# Supplementary material for: A Critical Role for The COP9 Signalosome Subunit 3 as A Gatekeeper of Genome Integrity in 2-Cell Mouse Embryos
Source: Research Square preprint supplement (doi:10.21203/rs.3.rs-135716/v1), 2021-01-04
Supplement: Supplementary file 1 [file 1896e6e57068d153597cc0d0.xlsx]

## Sheet: Tabelle1
A critical role for the COP9 signalosome subunit 3 as a gatekeeper of genome integrity in 2-cell mouse embryos
Gene Symbol	Public Gene IDs	ID	non-manipulated 2-cell embryo, replica1	non-manipulated 2-cell embryo, replica2	mCherry-Trim21 only 2-cell embryo, replica1	mCherry-Trim21 only 2-cell embryo, replica2	mCherry-Trim21 + antiCOPS3 2-cell embryo, replica1	mCherry-Trim21 + antiCOPS3 2-cell embryo, replica2	antiCOPS3 only 2-cell embryo, replica 1	antiCOPS3 only 2-cell embryo, replica 2	Description	Group
Mir466h	NR_030570; uc029uwl.1	TC0400002921.mm.1	621.668	916.506	849.223	1112.82	1398.83	792.353	1226.22	714.109	microRNA 466h	Multiple_Complex
Mir297a-2	NR_029648	TC0800002804.mm.1	467.882	729.114	515.561	861.078	995.999	942.272	1031.12	467.882	microRNA 297a-2	Multiple_Complex
Mir467c	NR_030571	TC1100001314.mm.1	282.088	292.036	401.707	448.822	319.573	36.5044	560.278	235.568	microRNA 467c	Multiple_Complex
Mir3470a	NR_037301; uc029rka.1	TC1100002080.mm.1	60305.4	84695.6	122295	127488	327242	482443	437827	69754.6	microRNA 3470a	Multiple_Complex
Mir466n	NR_037269	TC1100004045.mm.1	22.1618	23.4254	27.2843	26.7228	39.9466	30.4844	32.2226	23.4254	microRNA 466n	Multiple_Complex
Mir5125	NR_039586	TC1200001697.mm.1	935.763	519.147	709.176	625.992	36.7583	38.5859	5330.3	270.597	microRNA 5125	Multiple_Complex
Lypla1	NM_008866; ENSMUST00000027036; ENSMUST00000115529; ENSMUST00000119612; ENSMUST00000131119; ENSMUST00000134384; ENSMUST00000137887; ENSMUST00000141278; ENSMUST00000150971; BC013536; BC052848; NM_008866.2; OTTMUST00000051162; OTTMUST00000051163; OTTMUST00000051164; OTTMUST00000051165; OTTMUST00000051167; OTTMUST00000051168; OTTMUST00000051169; OTTMUST00000051170; uc007afg.1; uc007afh.1	TC0100003860.mm.1	685.019	704.277	634.73	600.491	657.114	576.03	330.842	809.002	lysophospholipase 1	Multiple_Complex
Tcea1	NM_001159750; NM_001159751; NM_011541; ENSMUST00000081551; ENSMUST00000165720; BC006022; BC061490; BC083127; NM_001159750.1; NM_001159751.1; NM_011541.4; OTTMUST00000111602; OTTMUST00000111603; uc007afi.2; uc011wht.1; uc011whu.1	TC0100003861.mm.1	9475.59	8422.31	8306.36	7967.99	3191.46	2164.77	9216.48	7131.55	transcription elongation factor A (SII) 1	Multiple_Complex
Oprk1	NM_001204371; NM_011011; ENSMUST00000027038; ENSMUST00000159083; ENSMUST00000160339; ENSMUST00000160777; BC116795; BC119026; NM_001204371.1; NM_011011.2; OTTMUST00000088255; OTTMUST00000088256; OTTMUST00000088257; OTTMUST00000088258; uc007afo.2; uc007afp.2; uc007afq.2	TC0100000018.mm.1	14.8254	15.7797	16.3362	15.7797	19.1597	19.0273	21.5557	17.2677	opioid receptor, kappa 1	Multiple_Complex
Rb1cc1	NM_009826; ENSMUST00000027040; ENSMUST00000159206; ENSMUST00000159349; ENSMUST00000159530; ENSMUST00000159656; ENSMUST00000159661; ENSMUST00000159802; ENSMUST00000159906; ENSMUST00000160062; ENSMUST00000160871; ENSMUST00000161183; ENSMUST00000161327; ENSMUST00000162210; ENSMUST00000162257; ENSMUST00000162418; ENSMUST00000162795; BC150774; NM_009826.4; OTTMUST00000084091; OTTMUST00000084094; OTTMU…	TC0100000021.mm.1	7033.37	7131.55	7434.4	7332.05	2683.69	2149.82	6165.49	4329.55	RB1-inducible coiled-coil 1	Multiple_Complex
St18	NM_001244692; NM_001244693; NM_173868; NR_045188; NR_045189; ENSMUST00000043578; ENSMUST00000124167; ENSMUST00000126379; ENSMUST00000130338; ENSMUST00000131467; ENSMUST00000131494; ENSMUST00000132207; ENSMUST00000139756; ENSMUST00000139838; ENSMUST00000140079; ENSMUST00000142304; ENSMUST00000150761; ENSMUST00000151015; ENSMUST00000151281; ENSMUST00000155921; ENSMUST00000163727; BC118528; NM_00124…	TC0100000023.mm.1	62.2499	63.5579	56.1028	53.0765	89.2636	87.4266	92.4115	58.0812	suppression of tumorigenicity 18	Multiple_Complex
Pcmtd1	NM_183028; ENSMUST00000061280; ENSMUST00000182114; ENSMUST00000182306; ENSMUST00000182388; ENSMUST00000182675; ENSMUST00000182823; ENSMUST00000182892; ENSMUST00000183204; BC052741; BC064801; BC110360; BC117941; BC117942; NM_183028.3; OTTMUST00000113805; OTTMUST00000113808; OTTMUST00000113809; OTTMUST00000113810; OTTMUST00000113811; OTTMUST00000113813; OTTMUST00000113814; OTTMUST00000113815; uc007…	TC0100000027.mm.1	306.555	288.015	216.767	188.706	219.793	188.706	497.999	333.144	protein-L-isoaspartate (D-aspartate) O-methyltransferase domain containing 1	Multiple_Complex
Adhfe1	NM_175236; NR_027664; ENSMUST00000027044; ENSMUST00000130927; ENSMUST00000144177; BC026584; NM_175236.4; NR_027664.1; OTTMUST00000053148; OTTMUST00000053149; OTTMUST00000053150; uc007agl.2; uc007agm.2	TC0100000039.mm.1	61.3929	67.1819	70.5219	67.1819	53.0765	57.68	53.8174	42.5179	alcohol dehydrogenase, iron containing, 1	Multiple_Complex
Sgk3	NM_001037759; NM_133220; NM_177547; ENSMUST00000097826; ENSMUST00000166384; ENSMUST00000168907; ENSMUST00000171265; BC018363; NM_001037759.1; NM_133220.2; NM_177547.3; uc007agu.1; uc007agv.1; uc007agw.1; uc007agx.1; uc007agy.1; uc011wid.1	TC0100000044.mm.1	203.657	202.251	195.361	203.657	93.0542	94.3532	160.898	184.823	serum/glucocorticoid regulated kinase 3	Multiple_Complex
Mcmdc2	NM_177722; ENSMUST00000052843; ENSMUST00000118098; ENSMUST00000125294; ENSMUST00000140948; ENSMUST00000171802; ENSMUST00000183059; NM_177722.3; OTTMUST00000051859; OTTMUST00000078009; OTTMUST00000078010; OTTMUST00000078011; OTTMUST00000113822; uc007agz.1; uc011wie.1	TC0100000045.mm.1	21.1121	22.7848	22.1618	24.0839	25.1067	29.2426	27.0958	20.9663	minichromosome maintenance domain containing 2	Multiple_Complex
Cspp1	NM_026493; ENSMUST00000071087; ENSMUST00000117415; ENSMUST00000118263; ENSMUST00000119714; ENSMUST00000122156; ENSMUST00000123261; ENSMUST00000128164; ENSMUST00000134716; ENSMUST00000136283; ENSMUST00000136898; ENSMUST00000143606; ENSMUST00000148663; ENSMUST00000149214; ENSMUST00000153804; ENSMUST00000155974; BC151042; NM_026493.3; OTTMUST00000067775; OTTMUST00000067776; OTTMUST00000067777; OTTMU…	TC0100000048.mm.1	107.635	103.25	103.968	100.427	82.7106	99.0442	163.144	89.2636	centrosome and spindle pole associated protein 1	Multiple_Complex
Gm15603	ENSMUST00000119252	TC0100000052.mm.1	22.1618	24.761	27.8576	34.5353	42.8137	53.0765	23.2636	19.5622	predicted gene 15603 [Source:MGI Symbol;Acc:MGI:3783050]	Multiple_Complex
Prex2	NM_001033636; NM_029525; ENSMUST00000027056; NM_001033636.4; NM_029525.1; uc007ahs.2; uc007aht.1; uc007ahu.1; uc007ahv.2	TC0100000055.mm.1	43.7133	39.9466	41.3553	37.5307	42.2243	45.5696	45.2548	45.8866	phosphatidylinositol-3,4,5-trisphosphate-dependent Rac exchange factor 2	Multiple_Complex
A830018L16Rik	NM_001160369; NM_001160370; NM_001160371; NM_177173; ENSMUST00000048613; ENSMUST00000135014; ENSMUST00000137824; ENSMUST00000141339; ENSMUST00000141512; ENSMUST00000142117; ENSMUST00000150870; ENSMUST00000171690; ENSMUST00000179089; BC137903; BC145022; BC145023; NM_001160369.2; NM_001160370.2; NM_001160371.2; NM_177173.6; uc007ahw.2; uc007ahx.2; uc007ahy.2; uc007ahz.1; uc011wii.1; uc011wij.1; uc0…	TC0100000056.mm.1	28.443	29.446	31.5594	28.6408	42.5179	44.6318	29.0406	28.2465	RIKEN cDNA A830018L16 gene	Multiple_Complex
Sulf1	NM_001198565; NM_001198566; NM_172294; ENSMUST00000088585; ENSMUST00000177608; ENSMUST00000180062; BC034547; BC049276; NM_001198565.1; NM_001198566.1; NM_172294.1; uc007aia.2; uc007aib.2; uc007aic.1; uc007aid.1; uc007aie.1	TC0100000064.mm.1	24.9333	28.84	26.1729	26.7228	30.0647	32.4467	34.0598	33.1285	sulfatase 1	Multiple_Complex
Gm9947	ENSMUST00000067599	TC0100000079.mm.1	22.1618	19.4271	25.4572	23.4254	35.0174	36.0019	33.3589	22.4711	predicted gene 9947 [Source:MGI Symbol;Acc:MGI:3642739]	Multiple_Complex
Kcnb2	NM_001098528; ENSMUST00000170146; ENSMUST00000171715; ENSMUST00000175681; BC146609; NM_001098528.2; OTTMUST00000110860; uc007aje.1	TC0100000082.mm.1	18.2522	17.7531	16.2234	19.0273	19.1597	19.6983	20.2521	18.2522	potassium voltage gated channel, Shab-related subfamily, member 2	Multiple_Complex
Rdh10	NM_133832; ENSMUST00000027053; ENSMUST00000152626; BC019796; NM_133832.3; OTTMUST00000062152; OTTMUST00000062153; uc007ajm.1	TC0100000097.mm.1	8480.89	7181.15	7912.95	6793.79	10660.6	7281.4	11268.4	12161.2	retinol dehydrogenase 10 (all-trans)	Multiple_Complex
Tmem70	NM_026392; NM_027415; ENSMUST00000065373; ENSMUST00000176451; ENSMUST00000177501; ENSMUST00000177532; BC011320; NM_026392.1; NM_027415.2; OTTMUST00000110681; OTTMUST00000110682; OTTMUST00000110683; OTTMUST00000110684; uc007ajx.1; uc007ajy.1	TC0100000101.mm.1	1509.65	1341.84	1060.11	955.426	206.5	199.466	471.136	910.175	transmembrane protein 70	Multiple_Complex
Gdap1	NM_010267; ENSMUST00000026879; ENSMUST00000150457; BC048177; BC051135; NM_010267.3; OTTMUST00000053130; OTTMUST00000053131; uc007akb.2; uc007akc.2	TC0100000109.mm.1	689.784	792.353	481.036	461.44	749.612	617.374	1488.87	1184.45	ganglioside-induced differentiation-associated-protein 1	Multiple_Complex
Tfap2d	NM_153154; ENSMUST00000037294; ENSMUST00000149505; BC152324; BC152325; NM_153154.2; OTTMUST00000065512; OTTMUST00000065513; uc007akp.1	TC0100000115.mm.1	18.507	19.2929	19.9733	20.6776	32.4467	32.8996	26.9087	19.0273	transcription factor AP-2, delta	Multiple_Complex
Tfap2b	NM_001025305; NM_001286340; NM_009334; ENSMUST00000027059; ENSMUST00000064976; NM_001025305.1; NM_009334.2; uc007akq.1; uc007akr.1; uc007akt.1; uc007aku.1; uc007aks.1	TC0100000116.mm.1	72.0037	79.8932	65.7993	65.3448	118.603	95.6704	73.0089	114.563	transcription factor AP-2 beta; transcription factor AP-2 beta (Tfap2b), transcript variant 1, mRNA.	Multiple_Complex
Mir206; Mir133b	NR_029593; NR_029902; NR_029593.1; NR_029902.1; uc011win.1	TC0100000125.mm.1	18.8959	17.8766	18.2522	18.507	21.1121	19.8353	26.3549	21.259	microRNA 206; microRNA 133b	Multiple_Complex
Paqr8	NM_028829; ENSMUST00000068880; ENSMUST00000167119; BC059813; NM_028829.3; uc007ald.1; uc007ale.1	TC0100000129.mm.1	26.9087	24.4201	25.1067	25.1067	26.5382	26.1729	27.8576	26.3549	progestin and adipoQ receptor family member VIII	Multiple_Complex
Efhc1	NM_027974; ENSMUST00000038447; ENSMUST00000160782; NM_027974.1; OTTMUST00000074047; OTTMUST00000074048; uc007alf.2	TC0100000131.mm.1	20.1122	20.9663	17.5087	19.4271	25.9921	28.0514	24.2515	20.2521	EF-hand domain (C-terminal) containing 1	Multiple_Complex
Gsta3	NM_001077353; NM_001288617; NM_010356; ENSMUST00000027067; ENSMUST00000121676; ENSMUST00000124990; BC147272; BC147273; NM_001077353.1; NM_010356.3; OTTMUST00000065121; OTTMUST00000065122; OTTMUST00000065123; uc007alk.1; uc007all.1	TC0100000135.mm.1	20.9663	20.8215	19.8353	23.2636	23.1029	30.4844	31.779	22.6274	glutathione S-transferase, alpha 3	Multiple_Complex
Khdc1a	NM_183322; ENSMUST00000088407; BC165941; NM_183322.2; OTTMUST00000085058; uc007aln.1	TC0100000137.mm.1	24491.6	26249.5	26068.1	26432	30362.4	22381.2	26249.5	28133.5	KH domain containing 1A; Synthetic construct Mus musculus clone IMAGE:100066241, MGC:195378 KH domain containing 1A (Khdc1a) mRNA, encodes complete protein.	Multiple_Complex
Gm16329	ENSMUST00000148174	TC0100000138.mm.1	1820.35	2005.85	1305.15	1296.13	1074.91	770.686	588.134	1200.98	predicted gene 16329 [Source:MGI Symbol;Acc:MGI:3840126]	Multiple_Complex
Gm16327	ENSMUST00000137146	TC0100000139.mm.1	4389.98	4211.15	2740.08	2836.7	407.315	155.417	393.44	2759.13	predicted gene 16327 [Source:MGI Symbol;Acc:MGI:3840125]	Multiple_Complex
Khdc1c; Khdc1a	NM_001033904; ENSMUST00000070223; BC099381; BC141037; BC165941_2; NM_001033904.1; OTTMUST00000097914; uc007alo.1	TC0100000140.mm.1	65536	65991.8	64633.7	66913.1	79573.5	68319	65083.3	70728.3	KH domain containing 1C; Synthetic construct Mus musculus clone IMAGE:100066241, MGC:195378 KH domain containing 1A (Khdc1a) mRNA, encodes complete protein.	Multiple_Complex
Gm16533	ENSMUST00000140035	TC0100000142.mm.1	3640.7	3281.18	2194.99	2149.82	342.509	192.672	321.795	1845.76	predited gene 16533 [Source:MGI Symbol;Acc:MGI:4410373]	Multiple_Complex
Mir30c-2	NR_029717; NR_029717.1; uc007ama.2	TC0100000156.mm.1	22.4711	28.2465	28.2465	28.443	32.6724	66.257	37.7918	36.0019	microRNA 30c-2	Multiple_Complex
Col9a1	NM_007740; ENSMUST00000054588; ENSMUST00000088349; ENSMUST00000124600; ENSMUST00000147902; BC038017; BC046970; NM_007740.3; OTTMUST00000054775; OTTMUST00000054776; OTTMUST00000054777; OTTMUST00000054778; uc007amo.2	TC0100000164.mm.1	22.4711	23.1029	24.59	26.5382	35.5062	36.2523	31.779	25.2813	collagen, type IX, alpha 1	Multiple_Complex
Gm15702	ENSMUST00000119680	TC0100000174.mm.1	31.3414	25.2813	26.3549	37.5307	26.1729	27.6652	29.2426	20.8215	predicted gene 15702 [Source:MGI Symbol;Acc:MGI:3783142]	Multiple_Complex
Lgsn	NM_153601; ENSMUST00000062560; ENSMUST00000161773; BC117745; BC117746; BC128067; NM_153601.1; OTTMUST00000065715; OTTMUST00000065716; uc007ank.1	TC0100000193.mm.1	30.91	29.6508	32	30.0647	36.0019	47.5048	34.2968	28.84	lengsin, lens protein with glutamine synthetase domain	Multiple_Complex
1700001G17Rik	NR_033199; ENSMUST00000051203; NR_033199.1; uc007ant.2	TC0100000214.mm.1	36.0019	50.5626	37.7918	33.1285	31.3414	25.1067	20.393	36.5044	RIKEN cDNA 1700001G17 gene	Multiple_Complex
Rab23	NM_001159729; NM_008999; ENSMUST00000088287; ENSMUST00000115174; ENSMUST00000122822; ENSMUST00000132066; ENSMUST00000135330; ENSMUST00000138024; ENSMUST00000140354; ENSMUST00000150593; ENSMUST00000151482; BC025578; NM_001159729.1; NM_008999.4; OTTMUST00000051907; OTTMUST00000051908; OTTMUST00000051909; OTTMUST00000051910; OTTMUST00000051911; OTTMUST00000051912; OTTMUST00000051913; OTTMUST00000051…	TC0100000215.mm.1	122.786	119.428	105.42	95.0095	86.8227	73.0089	75.0614	103.968	RAB23, member RAS oncogene family	Multiple_Complex
Dst	NM_001276764; NM_010081; NM_133833; NM_134448; ENSMUST00000097785; ENSMUST00000097786; ENSMUST00000115104; ENSMUST00000182018; ENSMUST00000182296; ENSMUST00000182314; ENSMUST00000182335; ENSMUST00000182410; ENSMUST00000182507; ENSMUST00000182513; ENSMUST00000182697; ENSMUST00000183006; ENSMUST00000183034; ENSMUST00000183100; ENSMUST00000183302; ENSMUST00000183331; NM_133833.2; NM_134448.2; OTTMUS…	TC0100000216.mm.1	227.544	233.941	221.322	206.5	165.421	142.025	168.897	184.823	dystonin; dystonin (Dst), transcript variant a, mRNA.	Multiple_Complex
Imp4	NM_178601; ENSMUST00000027303; ENSMUST00000128086; ENSMUST00000134327; ENSMUST00000136770; ENSMUST00000137794; ENSMUST00000147317; ENSMUST00000149962; BC069930; NM_178601.3; OTTMUST00000073351; OTTMUST00000073352; OTTMUST00000073353; OTTMUST00000073354; OTTMUST00000073355; OTTMUST00000073356; OTTMUST00000073357; uc007aor.2	TC0100000222.mm.1	14664.1	11993.8	11268.4	10513.8	1758.34	1795.29	2033.85	6841.04	IMP4, U3 small nucleolar ribonucleoprotein, homolog (yeast)	Multiple_Complex
Arhgef4; C230030N03Rik	NM_183019; ENSMUST00000047664; ENSMUST00000054582; ENSMUST00000159021; ENSMUST00000159059; ENSMUST00000159747; ENSMUST00000160855; ENSMUST00000162599; ENSMUST00000162760; BC139371; BC139397; NM_183019.2; OTTMUST00000083450; OTTMUST00000083451; OTTMUST00000083452; OTTMUST00000083453; OTTMUST00000083454; OTTMUST00000083455; OTTMUST00000083469; uc007apf.1; uc007apg.1; uc007aph.1; uc007api.1	TC0100000230.mm.1	46.8507	46.5271	48.1679	46.5271	40.7859	42.2243	39.3966	42.5179	Rho guanine nucleotide exchange factor (GEF) 4; RIKEN cDNA C230030N03 gene	Multiple_Complex
Plekhb2	NM_145516; NM_175421; ENSMUST00000027297; ENSMUST00000152654; ENSMUST00000156687; BC057994; NM_145516.2; NM_175421.1; OTTMUST00000073322; OTTMUST00000073323; OTTMUST00000073324; uc007apk.2; uc007apl.1	TC0100000233.mm.1	111.43	122.786	150.123	198.088	168.897	178.527	51.9842	128	pleckstrin homology domain containing, family B (evectins) member 2	Multiple_Complex
Arid5a	NM_001172205; NM_001172206; NM_145996; NR_033310; ENSMUST00000097778; ENSMUST00000115029; ENSMUST00000115031; ENSMUST00000115032; ENSMUST00000116629; ENSMUST00000124280; ENSMUST00000126413; ENSMUST00000137906; ENSMUST00000140218; ENSMUST00000141121; ENSMUST00000142319; ENSMUST00000145179; ENSMUST00000147123; ENSMUST00000150747; BC027152; NM_001172205.1; NM_001172206.1; NM_145996.4; NR_033310.1; O…	TC0100000240.mm.1	73.0089	80.4489	75.5835	76.6386	80.4489	75.0614	59.7141	62.2499	AT rich interactive domain 5A (MRF1-like)	Multiple_Complex
Fer1l5	NM_001277076; ENSMUST00000140452; ENSMUST00000179162; OTTMUST00000084899; OTTMUST00000111661; uc007aqb.1	TC0100000242.mm.1	23.5883	23.5883	26.5382	27.4741	42.2243	46.2057	39.3966	25.8125	fer-1-like 5 (C. elegans)	Multiple_Complex
Cnnm4	NM_033570; ENSMUST00000153128; BC172662; NM_033570.2; OTTMUST00000083926; uc007aqg.2	TC0100000244.mm.1	218.275	207.937	242.191	250.732	235.568	310.834	76.6386	218.275	cyclin M4; Synthetic construct Mus musculus clone IMAGE:100069470, MGC:199372 Cnnm4 protein (Cnnm4) mRNA, encodes complete protein.	Multiple_Complex
Cnnm3	NM_001039551; NM_053186; ENSMUST00000001166; ENSMUST00000097776; ENSMUST00000135100; ENSMUST00000154225; NM_001039551.1; NM_053186.2; OTTMUST00000051653; OTTMUST00000051654; OTTMUST00000051655; OTTMUST00000051656; uc007aqi.1; uc007aqj.1; uc007aqk.1; uc011wjk.1	TC0100000247.mm.1	84.4485	82.1393	83.2859	87.4266	59.7141	64.8934	56.8859	50.5626	cyclin M3	Multiple_Complex
Vwa3b	BC050813; BC147491; OTTMUST00000072793; OTTMUST00000072823; OTTMUST00000072824; OTTMUST00000086761; XM_003084438.1; uc007are.1; uc007arf.1; uc011wjo.1	TC0100000257.mm.1	22.3159	23.7524	25.6342	25.4572	31.125	36.2523	31.3414	25.6342	von Willebrand factor A domain containing 3B	Multiple_Complex
Inpp4a	NM_030266; NM_172971; ENSMUST00000027287; ENSMUST00000058307; ENSMUST00000114933; ENSMUST00000123124; ENSMUST00000132401; ENSMUST00000132615; ENSMUST00000136846; ENSMUST00000137266; ENSMUST00000140264; ENSMUST00000146676; ENSMUST00000168546; BC120541; BC144748; NM_030266.3; NM_172971.2; OTTMUST00000083008; OTTMUST00000083009; OTTMUST00000083011; OTTMUST00000083012; OTTMUST00000083030; OTTMUST0000…	TC0100000259.mm.1	359.538	333.144	340.144	349.706	942.272	608.874	328.557	254.232	inositol polyphosphate-4-phosphatase, type I	Multiple_Complex
Unc50	NM_026123; ENSMUST00000027285; ENSMUST00000114925; ENSMUST00000118059; ENSMUST00000134184; ENSMUST00000144617; BC019484; NM_026123.3; OTTMUST00000051682; OTTMUST00000051683; OTTMUST00000051684; OTTMUST00000051685; OTTMUST00000075443; uc007arp.1; uc007arq.1	TC0100000260.mm.1	33456.5	30152.7	16961.8	11910.9	12503.1	5595.3	48644.9	94629.3	unc-50 homolog (C. elegans)	Multiple_Complex
Mrpl30	NM_027098; ENSMUST00000027256; ENSMUST00000160082; ENSMUST00000161694; ENSMUST00000162513; BC004614; NM_027098.2; OTTMUST00000065720; OTTMUST00000065721; OTTMUST00000065722; OTTMUST00000065723; uc007asj.1	TC0100000268.mm.1	97.6806	103.25	101.829	101.829	93.7015	99.7331	116.162	94.3532	mitochondrial ribosomal protein L30	Multiple_Complex
Eif5b	NM_198303; ENSMUST00000027252; BC166034; NM_198303.2; uc007aso.1	TC0100000271.mm.1	12854.6	13216	11113.3	8964.45	2646.74	1060.11	2241.11	6427.31	eukaryotic translation initiation factor 5B; Synthetic construct Mus musculus clone IMAGE:100066334, MGC:195471 eukaryotic translation initiation factor 5B (Eif5b) mRNA, encodes complete protein.	Multiple_Complex
Npas2	NM_008719; ENSMUST00000056815; ENSMUST00000172825; ENSMUST00000173050; BC109166; NM_008719.2; OTTMUST00000094904; OTTMUST00000094905; OTTMUST00000094906; uc007atd.2	TC0100000282.mm.1	36.5044	38.8542	34.7755	34.2968	58.0812	51.6251	53.8174	72.5046	neuronal PAS domain protein 2	Multiple_Complex
Gm24826	ENSMUST00000083695	TC0100000285.mm.1	68.1197	60.1295	112.986	121.095	519.147	415.873	78.249	116.97	predicted gene, 24826 [Source:MGI Symbol;Acc:MGI:5454603]	Multiple_Complex
Cnot11	NM_028043; ENSMUST00000003219; ENSMUST00000160145; ENSMUST00000161515; BC049091; BC050812; NM_028043.2; OTTMUST00000065794; OTTMUST00000065795; uc007ati.1; uc007atj.1	TC0100000286.mm.1	237.207	227.544	199.466	213.783	396.177	442.643	203.657	290.018	CCR4-NOT transcription complex, subunit 11	Multiple_Complex
Map4k4	NM_001252200; NM_001252201; NM_001252202; NM_008696; ENSMUST00000163854; ENSMUST00000168431; BC141109; BC145390; BC145391; BC168387; NM_001252200.1; NM_001252201.1; NM_001252202.1; NM_008696.2; uc007atr.1; uc007ats.1; uc011wjv.1; uc011wjw.1; uc011wjx.1	TC0100000289.mm.1	224.411	270.597	190.019	199.466	344.892	261.379	142.025	151.167	mitogen-activated protein kinase kinase kinase kinase 4; Synthetic construct Mus musculus clone IMAGE:100068356, MGC:195900 mitogen-activated protein kinase kinase kinase kinase 4 (Map4k4) mRNA, encodes complete protein.	Multiple_Complex
Il18r1	NM_001161842; NM_001161843; NM_008365; ENSMUST00000087983; ENSMUST00000108044; ENSMUST00000167723; BC023240; NM_001161842.1; NM_001161843.1; NM_008365.2; uc007aud.1; uc007aue.1; uc007auf.1; uc007aug.1; uc011wjz.1	TC0100000299.mm.1	30.91	30.2738	29.0406	30.91	41.9326	35.0174	37.2715	31.779	interleukin 18 receptor 1	Multiple_Complex
Il18rap	NM_010553; ENSMUST00000027237; ENSMUST00000159724; ENSMUST00000160468; ENSMUST00000163057; BC120598; BC120600; NM_010553.3; OTTMUST00000088425; OTTMUST00000088426; OTTMUST00000088427; OTTMUST00000088447; uc007auk.1; uc007aui.1; uc007auj.1	TC0100000300.mm.1	19.6983	22.0087	19.6983	20.6776	25.4572	29.2426	26.5382	42.2243	interleukin 18 receptor accessory protein	Multiple_Complex
Tmem182	NM_001081198; ENSMUST00000114765; BC147440; BC147458; BC147740; BC147743; NM_001081198.1; OTTMUST00000110674; uc007auq.1	TC0100000304.mm.1	458.253	430.539	310.834	274.374	962.071	1251.98	2256.7	1782.89	transmembrane protein 182	Multiple_Complex
Pou3f3; 2900092D14Rik	NM_008900; NR_027891; ENSMUST00000054883; NM_008900.2; NR_027891.1; OTTMUST00000054069; uc007auw.1; uc007aux.2	TC0100000312.mm.1	28.443	29.0406	30.4844	32.8996	46.2057	56.493	39.1245	33.8246	POU domain, class 3, transcription factor 3; RIKEN cDNA 2900092D14 gene; RIKEN cDNA 2900092D14 gene (2900092D14Rik), non-coding RNA.	Multiple_Complex
Gpr45	NM_053107; ENSMUST00000114761; ENSMUST00000179655; ENSMUST00000179766; BC118506; BC118510; NM_053107.4; uc007avc.2; uc007avd.2	TC0100000317.mm.1	23.1029	20.6776	22.7848	22.1618	27.8576	34.0598	24.9333	20.2521	G protein-coupled receptor 45	Multiple_Complex
AI597479	NM_133818; ENSMUST00000010434; BC006931; NM_133818.1; uc007avj.1	TC0100000320.mm.1	689.784	613.109	362.039	261.379	326.288	261.379	685.019	814.629	expressed sequence AI597479	Multiple_Complex
Rpl29; Gm8210	BC002062; BC082292; BC094039; BC096575; XM_985134.4	TC0100000321.mm.1	18305.6	17198.6	21469.5	26068.1	3396.89	2998.45	8135.41	7804.01	ribosomal protein L29; predicted pseudogene 8210	Multiple_Complex
Nck2	NM_010879; ENSMUST00000086421; ENSMUST00000114744; ENSMUST00000124817; ENSMUST00000136648; BC011071; BC034255; NM_010879.3; OTTMUST00000049828; OTTMUST00000049829; OTTMUST00000049830; OTTMUST00000049831; XM_003688768.1; uc007avn.1; uc007avo.2	TC0100000323.mm.1	22.7848	22.6274	26.3549	27.0958	23.1029	22.6274	24.4201	18.7654	non-catalytic region of tyrosine kinase adaptor protein 2	Multiple_Complex
Bivm	NM_144558; ENSMUST00000035991; ENSMUST00000114709; ENSMUST00000129068; ENSMUST00000138521; ENSMUST00000155917; BC082584; NM_144558.4; OTTMUST00000055463; OTTMUST00000055464; OTTMUST00000055465; OTTMUST00000055466; OTTMUST00000055467; uc007awd.2; uc007awe.2; uc007awf.2	TC0100000333.mm.1	91.7731	101.125	95.6704	90.5097	369.646	261.379	56.493	187.403	basic, immunoglobulin-like variable motif containing	Multiple_Complex
Ercc5	NM_011729; ENSMUST00000027214; ENSMUST00000131177; ENSMUST00000137380; ENSMUST00000139510; ENSMUST00000145406; ENSMUST00000155862; BC141070; NM_011729.2; OTTMUST00000050813; OTTMUST00000050814; OTTMUST00000050815; OTTMUST00000050816; OTTMUST00000075845; OTTMUST00000075846; uc007awh.2; uc007awi.2; uc007awj.1	TC0100000334.mm.1	140.07	123.64	101.125	95.0095	83.8652	91.1392	82.7106	114.563	excision repair cross-complementing rodent repair deficiency, complementation group 5	Multiple_Complex
Gulp1	NM_028450; ENSMUST00000074525; ENSMUST00000159555; ENSMUST00000160854; ENSMUST00000161066; ENSMUST00000161793; ENSMUST00000162600; BC032154; NM_028450.3; OTTMUST00000075110; OTTMUST00000075111; OTTMUST00000075112; OTTMUST00000075113; OTTMUST00000075114; OTTMUST00000075115; uc007awl.2; uc007awm.2; uc007awn.2	TC0100000338.mm.1	28.84	36.7583	33.1285	33.5909	44.6318	45.8866	40.2244	53.4456	GULP, engulfment adaptor PTB domain containing 1	Multiple_Complex
Col3a1	NM_009930; ENSMUST00000087883; ENSMUST00000123204; ENSMUST00000129611; BC043089; BC052398; BC058724; NM_009930.2; OTTMUST00000050577; OTTMUST00000050578; OTTMUST00000050579; uc007awp.2; uc007awq.2	TC0100000343.mm.1	25.9921	26.5382	25.9921	26.3549	34.7755	34.5353	41.0696	31.3414	collagen, type III, alpha 1	Multiple_Complex
Wdr75	NM_028599; ENSMUST00000027139; ENSMUST00000135662; ENSMUST00000142145; ENSMUST00000143737; ENSMUST00000146602; ENSMUST00000147308; ENSMUST00000154436; BC117880; BC117881; NM_028599.2; OTTMUST00000053315; OTTMUST00000053316; OTTMUST00000053317; OTTMUST00000053318; OTTMUST00000053319; OTTMUST00000053320; OTTMUST00000053321; uc007awt.1; uc011wkg.1	TC0100000351.mm.1	4182.07	4420.52	4737.79	4938.99	809.002	975.501	2033.85	1606.83	WD repeat domain 75	Multiple_Complex
Tmeff2	NM_019790; ENSMUST00000081851; ENSMUST00000114565; ENSMUST00000139157; BC034850; NM_019790.4; OTTMUST00000053512; OTTMUST00000053513; OTTMUST00000053514; uc007axi.1; uc007axj.1	TC0100000364.mm.1	34.0598	39.3966	34.2968	39.9466	41.3553	39.3966	36.7583	48.5029	transmembrane protein with EGF-like and two follistatin-like domains 2	Multiple_Complex
Tmem194b	NM_001142647; NR_024590; ENSMUST00000165859; NM_001142647.1; NR_024590.1; uc007ayk.3; uc011wkp.1; uc029qoj.1; uc029qok.1; uc029qol.1	TC0100000380.mm.1	25.9921	24.2515	24.4201	24.59	25.8125	22.9433	149.086	26.3549	transmembrane protein 194B	Multiple_Complex
Hibch	NM_146108; ENSMUST00000044478; ENSMUST00000159352; ENSMUST00000159431; ENSMUST00000161125; ENSMUST00000161552; ENSMUST00000162609; BC026437; NM_146108.1; OTTMUST00000075675; OTTMUST00000075676; OTTMUST00000075677; OTTMUST00000075678; OTTMUST00000075679; OTTMUST00000075680; uc007ayp.1; uc011wkr.1	TC0100000381.mm.1	93.0542	83.2859	93.0542	89.2636	44.0173	40.5042	90.5097	44.9422	3-hydroxyisobutyryl-Coenzyme A hydrolase	Multiple_Complex
Ormdl1	NM_145517; ENSMUST00000027266; ENSMUST00000135746; BC012315; BC023695; BC025572; NM_145517.4; OTTMUST00000051803; OTTMUST00000051804; uc007ayy.2; uc011wks.1	TC0100000386.mm.1	18.507	19.5622	18.3792	19.0273	24.0839	18.1261	23.4254	19.6983	ORM1-like 1 (S. cerevisiae)	Multiple_Complex
Osgepl1	NM_001285839; NR_104360; NR_104361; ENSMUST00000027265; ENSMUST00000114484; ENSMUST00000135614; ENSMUST00000135786; ENSMUST00000150115; ENSMUST00000151296; ENSMUST00000153939; BC058172; NM_028091.3; OTTMUST00000051976; OTTMUST00000051977; OTTMUST00000051978; OTTMUST00000051979; OTTMUST00000051980; OTTMUST00000051981; OTTMUST00000051982; uc007aza.1; uc007azb.1; uc007azc.1; uc007azd.1; uc011wkt.1	TC0100000387.mm.1	194.012	206.5	184.823	230.72	548.748	515.561	359.538	259.574	O-sialoglycoprotein endopeptidase-like 1; O-sialoglycoprotein endopeptidase-like 1 (Osgepl1), mRNA.	Multiple_Complex
Ccdc150	NM_030025; ENSMUST00000027128; ENSMUST00000159682; ENSMUST00000160472; ENSMUST00000161988; ENSMUST00000163072; NM_030025.2; OTTMUST00000088448; OTTMUST00000088449; OTTMUST00000088450; OTTMUST00000088451; OTTMUST00000088452; uc007azn.1; uc007azo.1; uc011wkx.1	TC0100000390.mm.1	25.1067	29.2426	26.5382	26.1729	29.8571	32	29.6508	25.2813	coiled-coil domain containing 150	Multiple_Complex
Coq10b	NM_001039710; NM_026424; ENSMUST00000027125; ENSMUST00000087617; BC062129; NM_001039710.1; NM_026424.3; uc007azz.1; uc007baa.1	TC0100000393.mm.1	831.746	820.296	533.742	600.491	765.363	820.296	1499.22	1176.27	coenzyme Q10 homolog B (S. cerevisiae)	Multiple_Complex
Hspe1	NM_008303; ENSMUST00000075242; ENSMUST00000134628; BC024385; BC099385; NM_008303.4; OTTMUST00000051785; OTTMUST00000051786; uc007bac.2	TC0100000395.mm.1	699.413	666.287	1045.52	1052.79	1314.23	1031.12	666.287	776.047	heat shock protein 1 (chaperonin 10)	Multiple_Complex
Gm16581	ENSMUST00000160730	TC0100000396.mm.1	477.713	326.288	352.139	245.572	148.056	179.769	266.871	196.72	predicted gene 16581 [Source:MGI Symbol;Acc:MGI:4415001]	Multiple_Complex
Mob4	NM_025283; ENSMUST00000027122; ENSMUST00000159311; ENSMUST00000159743; ENSMUST00000161122; ENSMUST00000162364; ENSMUST00000162553; ENSMUST00000162930; BC037499; BC058168; NM_025283.3; OTTMUST00000088312; OTTMUST00000088313; OTTMUST00000088314; OTTMUST00000088315; OTTMUST00000088316; OTTMUST00000088317; OTTMUST00000088318; uc007bad.1; uc007bae.1	TC0100000397.mm.1	548.748	519.147	548.748	556.408	418.766	390.722	352.139	560.278	MOB family member 4, phocein	Multiple_Complex
Spats2l	NM_001164566; NM_144882; ENSMUST00000163239; ENSMUST00000163922; ENSMUST00000164302; ENSMUST00000164353; ENSMUST00000165235; ENSMUST00000167085; ENSMUST00000167971; ENSMUST00000168016; ENSMUST00000168895; ENSMUST00000168905; ENSMUST00000169772; ENSMUST00000170139; ENSMUST00000171699; ENSMUST00000172068; ENSMUST00000172287; BC014764; BC021879; NM_001164566.1; NM_144882.4; OTTMUST00000089542; OTTMU…	TC0100000424.mm.1	21.5557	21.7057	22.1618	22.1618	25.1067	27.2843	27.4741	23.5883	spermatogenesis associated, serine-rich 2-like	Multiple_Complex
Sgol2a	NM_001177867; NM_199007; ENSMUST00000027202; BC052742; OTTMUST00000051809; uc007bbk.2; uc011wlj.1	TC0100000426.mm.1	982.286	903.888	781.445	820.296	530.056	564.175	613.109	556.408	shugoshin-like 2a (S. pombe)	Multiple_Complex
Aox1	NM_009676; ENSMUST00000001027; ENSMUST00000160168; BC026132; NM_009676.2; OTTMUST00000073919; OTTMUST00000073920; uc007bbl.1	TC0100000427.mm.1	21.4068	22.3159	21.259	22.7848	26.1729	28.0514	29.2426	20.6776	aldehyde oxidase 1	Multiple_Complex
Aox3	NM_023617; ENSMUST00000040999; ENSMUST00000159014; ENSMUST00000160815; ENSMUST00000161549; ENSMUST00000162011; BC138876; NM_023617.2; OTTMUST00000051933; OTTMUST00000051934; OTTMUST00000051935; OTTMUST00000064418; OTTMUST00000064419; uc007bbm.1; uc007bbn.1	TC0100000428.mm.1	18.3792	17.5087	20.8215	20.1122	28.84	32.6724	28.2465	19.2929	aldehyde oxidase 3	Multiple_Complex
Aox4	NM_023631; ENSMUST00000040442; ENSMUST00000159240; ENSMUST00000161833; ENSMUST00000161926; BC117975; BC117976; NM_023631.2; OTTMUST00000064268; OTTMUST00000064269; OTTMUST00000064270; OTTMUST00000064353; uc007bbo.1	TC0100000430.mm.1	38.0546	39.6706	37.5307	38.0546	45.8866	49.5221	40.7859	42.5179	aldehyde oxidase 4	Multiple_Complex
Bzw1	NM_025824; ENSMUST00000050552; BC005466; BC028865; NM_025824.3; uc007bbq.1; uc007bbr.1	TC0100000433.mm.1	41476.3	39239	31216	25531.7	4182.07	2521.38	15825.9	42055.3	basic leucine zipper and W2 domains 1	Multiple_Complex
Nif3l1	NM_022988; ENSMUST00000087521; ENSMUST00000114337; ENSMUST00000129759; ENSMUST00000140723; ENSMUST00000151272; ENSMUST00000171597; BC065163; BC089475; NM_022988.2; OTTMUST00000052148; OTTMUST00000052149; OTTMUST00000052150; OTTMUST00000052151; OTTMUST00000052152; uc007bbz.1; uc007bca.1; uc007bcb.1	TC0100000434.mm.1	123.64	105.42	124.5	147.033	96.3358	115.36	71.5064	115.36	Ngg1 interacting factor 3-like 1 (S. pombe)	Multiple_Complex
Cflar	NM_001289704; NM_009805; NM_207653; NR_110361; ENSMUST00000069333; ENSMUST00000097722; ENSMUST00000097723; ENSMUST00000114309; ENSMUST00000114313; ENSMUST00000123032; ENSMUST00000123553; ENSMUST00000124567; ENSMUST00000140940; ENSMUST00000149874; ENSMUST00000156870; ENSMUST00000164900; BC029223; NM_009805.4; NM_207653.3; OTTMUST00000046764; OTTMUST00000046765; OTTMUST00000046766; OTTMUST000000467…	TC0100000439.mm.1	63.5579	64.8934	61.3929	63.1189	85.0359	76.1093	49.5221	55.7152	CASP8 and FADD-like apoptosis regulator; CASP8 and FADD-like apoptosis regulator (Cflar), transcript variant 4, long non-coding RNA.	Multiple_Complex
Stradb	NM_172656; ENSMUST00000027185; ENSMUST00000114296; ENSMUST00000123301; ENSMUST00000123965; ENSMUST00000147637; ENSMUST00000152318; ENSMUST00000153990; BC060956; NM_172656.5; OTTMUST00000049162; OTTMUST00000049163; OTTMUST00000049164; OTTMUST00000049165; OTTMUST00000049166; OTTMUST00000049167; OTTMUST00000049169; uc007bcw.1; uc007bcx.1; uc007bcy.1; uc007bcz.1; uc007bda.1	TC0100000442.mm.1	694.581	770.686	522.758	487.751	1734.13	1314.23	1478.58	1351.18	STE20-related kinase adaptor beta	Multiple_Complex
Cdk15	NM_001033373; ENSMUST00000114248; ENSMUST00000160662; ENSMUST00000162487; ENSMUST00000162906; BC147314; BC147315; BC147758; BC147763; BC172036; NM_001033373.2; OTTMUST00000074023; OTTMUST00000074319; OTTMUST00000074320; uc007bdq.2; uc007bdr.2; uc007bds.2	TC0100000447.mm.1	57.68	53.8174	43.4113	39.3966	48.1679	53.4456	44.3235	75.0614	cyclin-dependent kinase 15	Multiple_Complex
Bmpr2	NM_007561; ENSMUST00000087435; BC156868; NM_007561.3; uc007bdz.1	TC0100000462.mm.1	8719.32	9410.14	6841.04	5752.61	6038.61	4482.23	9152.82	10369.1	bone morphogenetic protein receptor, type II (serine/threonine kinase); Synthetic construct Mus musculus clone IMAGE:100062725, MGC:190942 bone morphogenic protein receptor, type II (serine/threonine kinase) (Bmpr2) mRNA, encodes complete protein.	Multiple_Complex
Fam117b	NM_001037725; ENSMUST00000036540; ENSMUST00000151630; NM_001037725.2; OTTMUST00000049436; OTTMUST00000049437; uc011wlt.1	TC0100000464.mm.1	4182.07	4389.98	4011.71	3691.52	8192	5518.27	3468.27	3743.05	family with sequence similarity 117, member B	Multiple_Complex
Carf	NM_001285463; NM_001285473; NM_139150; NR_104344; ENSMUST00000027171; ENSMUST00000124986; ENSMUST00000130075; ENSMUST00000132949; ENSMUST00000150008; ENSMUST00000180952; BC138644; BC138645; NM_139150.4; OTTMUST00000053331; OTTMUST00000053332; OTTMUST00000053333; OTTMUST00000053334; OTTMUST00000053335; uc007beh.1; uc007bei.1; uc011wlu.1; uc011wlv.1; uc011wlw.1	TC0100000465.mm.1	78.249	79.8932	75.5835	79.8932	78.7932	75.0614	181.019	92.4115	calcium response factor; calcium response factor (Carf), mRNA.	Multiple_Complex
Nbeal1	NM_173444; ENSMUST00000035569; ENSMUST00000159344; ENSMUST00000160834; ENSMUST00000160980; ENSMUST00000162291; NM_173444.2; OTTMUST00000086714; OTTMUST00000086715; OTTMUST00000086762; OTTMUST00000086763; uc007bej.1; uc007bek.1; uc011wlx.1; uc011wly.1	TC0100000467.mm.1	135.298	144.007	107.635	99.0442	177.294	126.238	151.167	238.856	neurobeachin like 1	Multiple_Complex
Abi2	NM_001198570; NM_001198571; NM_198127; ENSMUST00000052332; BC056345; BC079545; BC079646; NM_001198570.1; NM_001198571.1; NM_198127.2; uc007bep.2; uc007beq.2; uc007ber.2	TC0100000471.mm.1	357.054	333.144	310.834	272.479	342.509	219.793	319.573	625.992	abl-interactor 2	Multiple_Complex
Gm11576	ENSMUST00000117433	TC0100000473.mm.1	20.1122	19.1597	21.8566	22.9433	21.4068	32.8996	28.0514	21.1121	predicted gene 11576 [Source:MGI Symbol;Acc:MGI:3649593]	Multiple_Complex
Gm11577	ENSMUST00000118030	TC0100000474.mm.1	12.4666	11.3924	14.8254	13.0864	19.5622	25.4572	23.5883	14.1232	predicted gene 11577 [Source:MGI Symbol;Acc:MGI:3650975]	Multiple_Complex
Cd28	NM_007642; ENSMUST00000027165; ENSMUST00000132833; ENSMUST00000153207; BC064058; NM_007642.4; OTTMUST00000004499; OTTMUST00000004500; OTTMUST00000005226; uc007bev.2; uc007bew.2	TC0100000476.mm.1	25.6342	26.1729	30.6965	29.8571	31.125	36.0019	36.2523	30.6965	CD28 antigen	Multiple_Complex
Gm11609	ENSMUST00000121926	TC0100000481.mm.1	12.996	15.455	17.6305	20.6776	17.3878	17.2677	23.5883	12.4666	predicted gene 11609 [Source:MGI Symbol;Acc:MGI:3694969]	Multiple_Complex
Ctla4	NM_001281976; NM_009843; ENSMUST00000027164; ENSMUST00000097720; ENSMUST00000124816; BC042741; BC052683; NM_009843.3; OTTMUST00000004524; OTTMUST00000004536; OTTMUST00000004540; uc007bez.1; uc007bfa.1	TC0100000485.mm.1	39.6706	48.1679	47.8352	49.5221	60.5477	60.5477	70.5219	81.5719	cytotoxic T-lymphocyte-associated protein 4; cytotoxic T-lymphocyte-associated protein 4 (Ctla4), mRNA.	Multiple_Complex
Pard3b	NM_001081050; ENSMUST00000046673; ENSMUST00000075374; ENSMUST00000094906; ENSMUST00000129030; ENSMUST00000138768; BC167176; NM_001081050.2; OTTMUST00000004714; OTTMUST00000004897; OTTMUST00000004898; OTTMUST00000004899; OTTMUST00000004902; uc007bfc.2; uc007bfd.2; uc007bfe.2; uc011wma.1	TC0100000497.mm.1	35.0174	32.8996	33.3589	34.5353	43.4113	40.2244	32	35.7532	par-3 family cell polarity regulator beta; Synthetic construct Mus musculus clone IMAGE:100068076, MGC:195693 Pard3b protein (Pard3b) mRNA, encodes complete protein.; par-3 partitioning defective 3 homolog B (C. elegans)	Multiple_Complex
Nrp2	NM_001077403; NM_001077404; NM_001077405; NM_001077406; NM_001077407; NM_010939; ENSMUST00000027112; ENSMUST00000063594; ENSMUST00000075144; ENSMUST00000102822; ENSMUST00000114155; ENSMUST00000114157; ENSMUST00000126344; BC156989; NM_001077403.1; NM_001077404.1; NM_001077405.1; NM_001077406.1; NM_001077407.1; NM_010939.2; OTTMUST00000004995; OTTMUST00000004997; OTTMUST00000004998; OTTMUST00000004…	TC0100000509.mm.1	22.6274	22.4711	25.2813	25.4572	39.3966	37.2715	33.8246	25.6342	neuropilin 2; Synthetic construct Mus musculus clone IMAGE:100062848, MGC:190972 neuropilin 2 (Nrp2) mRNA, encodes complete protein.	Multiple_Complex
Rps13-ps7	ENSMUST00000122045	TC0100000515.mm.1	42.8137	43.7133	43.1115	71.5064	38.0546	39.6706	51.6251	38.3193	ribosomal protein S13, pseudogene 7 [Source:MGI Symbol;Acc:MGI:3650301]	Multiple_Complex
Rps27-ps1	OTTMUST00000005072	TC0100000516.mm.1	143.013	182.278	170.072	212.306	50.5626	55.3304	93.7015	103.25	ribosomal protein S27, pseudogene 1	Multiple_Complex
Eef1b2	NM_018796; ENSMUST00000027108; ENSMUST00000126469; ENSMUST00000126795; ENSMUST00000129339; ENSMUST00000135877; ENSMUST00000142062; ENSMUST00000148553; ENSMUST00000174890; BC003899; BC023139; NM_018796.3; OTTMUST00000005070; OTTMUST00000005071; OTTMUST00000047129; OTTMUST00000047130; OTTMUST00000047131; OTTMUST00000047132; OTTMUST00000047133; OTTMUST00000095759; uc007bfz.2	TC0100000519.mm.1	445.722	477.713	439.586	369.646	227.544	171.255	689.784	831.746	eukaryotic translation elongation factor 1 beta 2	Multiple_Complex
Zdbf2	NM_001267872; NM_001285936; NM_001285937; NM_028673; ENSMUST00000029025; ENSMUST00000114132; ENSMUST00000126932; NM_028673.1; OTTMUST00000005182; OTTMUST00000018784; uc007bgb.2; uc007bgc.2	TC0100000523.mm.1	45.8866	47.8352	44.3235	46.8507	47.5048	43.4113	47.1766	40.2244	zinc finger, DBF-type containing 2	Multiple_Complex
Adam23	NM_001177600; NM_011780; ENSMUST00000087374; ENSMUST00000097717; ENSMUST00000114101; ENSMUST00000114103; ENSMUST00000114107; ENSMUST00000134704; ENSMUST00000141545; ENSMUST00000146403; ENSMUST00000182642; NM_001177600.1; NM_011780.2; OTTMUST00000004901; OTTMUST00000005207; OTTMUST00000005208; OTTMUST00000005209; OTTMUST00000005210; OTTMUST00000005211; OTTMUST00000005212; uc007bgd.1; uc007bge.1; u…	TC0100000524.mm.1	19.8353	18.6357	19.2929	19.1597	23.7524	25.4572	25.8125	20.1122	a disintegrin and metallopeptidase domain 23 (Adam23), transcript variant 1, mRNA.; a disintegrin and metallopeptidase domain 23	Multiple_Complex
Gm12748	ENSMUST00000120763	TC0100000525.mm.1	19.6983	16.9123	28.84	24.9333	45.8866	91.1392	44.3235	22.0087	predicted gene 12748 [Source:MGI Symbol;Acc:MGI:3652128]	Multiple_Complex
Fastkd2	NM_172422; ENSMUST00000027103; ENSMUST00000123945; ENSMUST00000128621; ENSMUST00000131478; ENSMUST00000134454; ENSMUST00000148758; BC008271; BC057208; BC080813; NM_172422.3; OTTMUST00000033153; OTTMUST00000033154; OTTMUST00000033155; OTTMUST00000033156; OTTMUST00000033157; OTTMUST00000060877; uc007bgk.3; uc007bgl.2	TC0100000526.mm.1	249	233.941	160.898	163.144	122.786	115.36	188.706	254.232	FAST kinase domains 2	Multiple_Complex
Gm13754	ENSMUST00000120486	TC0100000527.mm.1	20.1122	18.6357	22.0087	23.5883	32.4467	38.8542	26.5382	22.4711	predicted gene 13754 [Source:MGI Symbol;Acc:MGI:3651213]	Multiple_Complex
Gm13749	NR_027824; BC147571; BC147573; NR_027824.1; uc007bgm.1	TC0100000528.mm.1	22.3159	23.7524	20.2521	21.8566	46.8507	62.2499	46.2057	34.0598	predicted gene 13749	Multiple_Complex
Ccnyl1	NM_001097644; ENSMUST00000094898; ENSMUST00000114077; NM_001097644.1; OTTMUST00000051077; uc007bgx.1	TC0100000541.mm.1	2836.7	2288.2	2452.44	2503.97	2368.9	2048	3040.3	1370.04	cyclin Y-like 1	Multiple_Complex
Rpl31-ps24	OTTMUST00000112308	TC0100000543.mm.1	152.219	192.672	194.012	206.5	39.1245	49.5221	103.25	122.786	ribosomal protein L31, pseudogene 24	Multiple_Complex
Gm8550	ENSMUST00000161621	TC0100000544.mm.1	86.8227	133.436	67.1819	78.7932	20.9663	34.7755	85.0359	92.4115	predicted gene 8550 [Source:MGI Symbol;Acc:MGI:3779803]	Multiple_Complex
Pikfyve	NM_011086; ENSMUST00000081154; ENSMUST00000097707; NM_011086.2; uc007bho.1; uc007bhp.1; uc007bhq.1; uc007bhr.1; uc007bhs.1; uc007bht.1	TC0100000545.mm.1	430.539	448.822	413.001	398.932	439.586	390.722	312.996	324.034	phosphoinositide kinase, FYVE finger containing	Multiple_Complex
Gm8805	ENSMUST00000117848	TC0100000547.mm.1	719.076	657.114	699.413	749.612	382.681	312.996	544.958	604.668	predicted gene 8805 [Source:MGI Symbol;Acc:MGI:3643512]	Multiple_Complex
Gm15659	ENSMUST00000118881	TC0100000549.mm.1	436.549	481.036	455.087	608.874	126.238	145.009	136.239	186.108	predicted gene 15659 [Source:MGI Symbol;Acc:MGI:3801822]	Multiple_Complex
Gm8812	ENSMUST00000118496	TC0100000550.mm.1	19.9733	17.3878	21.259	20.8215	50.5626	54.1917	41.6429	32.6724	predicted gene 8812 [Source:MGI Symbol;Acc:MGI:3643091]	Multiple_Complex
Map2	NM_001039934; NM_008632; ENSMUST00000024639; ENSMUST00000077355; ENSMUST00000114012; ENSMUST00000114013; ENSMUST00000114015; ENSMUST00000114017; ENSMUST00000114018; ENSMUST00000123647; ENSMUST00000124873; ENSMUST00000125844; ENSMUST00000127388; ENSMUST00000128673; ENSMUST00000133522; ENSMUST00000137807; ENSMUST00000141148; ENSMUST00000145419; ENSMUST00000151423; ENSMUST00000156636; ENSMUST0000017…	TC0100000551.mm.1	68.1197	74.028	63.1189	64.8934	112.986	110.661	127.116	84.4485	microtubule-associated protein 2	Multiple_Complex
Unc80	NM_175510; ENSMUST00000061620; ENSMUST00000114008; ENSMUST00000136727; ENSMUST00000152844; BC116430; NM_175510.3; OTTMUST00000064844; OTTMUST00000064845; OTTMUST00000064846; OTTMUST00000103888; uc007bif.2; uc007bih.2; uc007bii.2; uc011wmk.1	TC0100000558.mm.1	21.5557	21.5557	22.9433	22.9433	29.2426	30.2738	26.3549	22.9433	unc-80 homolog (C. elegans)	Multiple_Complex
Gm15789	ENSMUST00000118992	TC0100000566.mm.1	18.0009	27.8576	23.2636	15.7797	20.9663	18.3792	25.4572	20.9663	predicted gene 15789 [Source:MGI Symbol;Acc:MGI:3783231]	Multiple_Complex
Gm15826	ENSMUST00000121328	TC0100000571.mm.1	23.1029	21.4068	23.5883	23.4254	37.5307	41.0696	50.5626	22.6274	predicted gene 15826 [Source:MGI Symbol;Acc:MGI:3801881]	Multiple_Complex
Cps1	NM_001080809; ENSMUST00000027144; BC126969; NM_001080809.1; OTTMUST00000065667; uc007biy.1; uc007biz.1	TC0100000572.mm.1	21.1121	19.2929	19.8353	21.259	31.3414	28.6408	30.0647	20.9663	carbamoyl-phosphate synthetase 1; carbamoyl-phosphate synthetase 1, mRNA (cDNA clone IMAGE:4160125), partial cds.	Multiple_Complex
Kif22-ps	OTTMUST00000051774	TC0100000575.mm.1	44.0173	44.3235	49.8665	56.8859	33.5909	48.1679	45.2548	38.8542	kinesin family member 22, pseudogene	Multiple_Complex
Spag16	NM_001271533; NM_025728; NM_029160; ENSMUST00000065425; ENSMUST00000113940; ENSMUST00000161131; ENSMUST00000161310; BC120668; BC145006; NM_025728.3; NM_029160.2; OTTMUST00000086830; OTTMUST00000086831; OTTMUST00000086832; OTTMUST00000086833; uc007bjg.1; uc007bjh.1; uc007bji.1	TC0100000585.mm.1	41.3553	45.2548	48.8403	45.2548	74.028	66.7178	147.033	104.691	sperm associated antigen 16; sperm associated antigen 16 (Spag16), transcript variant 2, mRNA.	Multiple_Complex
Vwc2l	NM_177164; ENSMUST00000053922; ENSMUST00000159205; ENSMUST00000161937; ENSMUST00000162182; BC094541; NM_177164.3; OTTMUST00000065892; OTTMUST00000065893; OTTMUST00000065894; OTTMUST00000065895; uc007bjj.1; uc007bjk.1; uc011wmn.1; uc011wmo.1; uc011wmp.1	TC0100000588.mm.1	16.1113	15.8895	16.2234	16.2234	24.9333	23.2636	22.6274	18.2522	von Willebrand factor C domain-containing protein 2-like	Multiple_Complex
Atic	NM_026195; ENSMUST00000027384; ENSMUST00000136443; ENSMUST00000148077; ENSMUST00000154855; ENSMUST00000155769; BC039925; NM_026195.3; OTTMUST00000084659; OTTMUST00000084660; OTTMUST00000084661; OTTMUST00000084662; OTTMUST00000084663; uc007bjr.2; uc007bjs.2; uc007bjt.2	TC0100000590.mm.1	219.793	183.546	205.074	207.937	137.187	121.095	66.7178	172.446	5-aminoimidazole-4-carboxamide ribonucleotide formyltransferase/IMP cyclohydrolase	Multiple_Complex
Apol7d	NR_040308; NR_040308.1; OTTMUST00000052539; OTTMUST00000052540; OTTMUST00000052541; OTTMUST00000052542; uc007bke.1; uc007bkf.1	TC0100000591.mm.1	18.2522	19.2929	21.259	22.0087	34.5353	33.8246	28.84	20.1122	apolipoprotein L 7d; novel protein	Multiple_Complex
Xrcc5	NM_009533; ENSMUST00000027379; BC051660; NM_009533.2; uc007bkl.2	TC0100000602.mm.1	137.187	179.769	128.89	128	143.013	145.009	195.361	142.025	X-ray repair complementing defective repair in Chinese hamster cells 5	Multiple_Complex
Smarcal1	NM_018817; ENSMUST00000047615; ENSMUST00000126832; ENSMUST00000133123; ENSMUST00000136498; ENSMUST00000145868; ENSMUST00000150725; ENSMUST00000152225; ENSMUST00000152814; ENSMUST00000156797; BC029078; NM_018817.2; OTTMUST00000050950; OTTMUST00000050951; OTTMUST00000050952; OTTMUST00000050953; OTTMUST00000050954; OTTMUST00000050955; OTTMUST00000050956; OTTMUST00000050957; OTTMUST00000050959; uc007…	TC0100000608.mm.1	140.07	143.013	106.891	106.891	167.73	112.206	93.7015	171.255	SWI/SNF related matrix associated, actin dependent regulator of chromatin, subfamily a-like 1	Multiple_Complex
Igfbp2	NM_008342; ENSMUST00000047328; ENSMUST00000120564; ENSMUST00000155703; BC012724; BC054473; NM_008342.3; OTTMUST00000073338; OTTMUST00000073339; OTTMUST00000073340; uc007bkw.2	TC0100000610.mm.1	63.5579	61.3929	82.7106	90.5097	63.5579	67.6492	87.4266	50.2134	insulin-like growth factor binding protein 2	Multiple_Complex
Arpc2	NM_029711; ENSMUST00000006467; ENSMUST00000113819; ENSMUST00000113820; BC115750; NM_029711.1; OTTMUST00000039637; OTTMUST00000041972; OTTMUST00000041973; uc007bln.1; uc007blo.1; uc007blp.1	TC0100000625.mm.1	9674.69	10085.5	8841.04	8192	7082.29	7332.05	11113.3	9475.59	actin related protein 2/3 complex, subunit 2	Multiple_Complex
Pnkd	NM_001039509; NM_019999; NM_025580; ENSMUST00000027370; ENSMUST00000087225; ENSMUST00000087226; ENSMUST00000113805; ENSMUST00000129219; ENSMUST00000138620; ENSMUST00000152492; BC058945; NM_001039509.1; NM_019999.2; NM_025580.2; OTTMUST00000051553; OTTMUST00000051554; OTTMUST00000051555; OTTMUST00000051563; OTTMUST00000051564; OTTMUST00000051565; OTTMUST00000051566; uc007bls.1; uc007blt.1; uc007bl…	TC0100000627.mm.1	113.772	116.162	109.137	113.772	154.343	160.898	101.829	145.009	paroxysmal nonkinesiogenic dyskinesia	Multiple_Complex
Slc11a1	NM_013612; ENSMUST00000027368; ENSMUST00000127487; ENSMUST00000131511; ENSMUST00000133896; ENSMUST00000134189; ENSMUST00000135137; ENSMUST00000136786; ENSMUST00000147233; ENSMUST00000149166; ENSMUST00000155865; BC109137; BC109138; NM_013612.2; OTTMUST00000040229; OTTMUST00000040230; OTTMUST00000040231; OTTMUST00000040232; OTTMUST00000040233; OTTMUST00000040234; OTTMUST00000040235; OTTMUST00000040…	TC0100000632.mm.1	36.0019	34.2968	38.0546	40.7859	37.7918	39.9466	35.7532	32.4467	solute carrier family 11 (proton-coupled divalent metal ion transporters), member 1	Multiple_Complex
Ctdsp1	NM_153088; ENSMUST00000027367; ENSMUST00000141175; ENSMUST00000152659; BC049184; BC065158; BC079638; NM_153088.2; OTTMUST00000051577; OTTMUST00000051578; OTTMUST00000051579; uc007blz.2	TC0100000633.mm.1	171.255	174.853	191.341	190.019	504.951	404.501	157.586	184.823	CTD (carboxy-terminal domain, RNA polymerase II, polypeptide A) small phosphatase 1	Multiple_Complex
Vil1	NM_009509; ENSMUST00000027366; ENSMUST00000159749; ENSMUST00000161087; ENSMUST00000163018; BC015267; BC117875; BC145671; NM_009509.2; OTTMUST00000051580; OTTMUST00000051581; OTTMUST00000051582; OTTMUST00000051583; uc007bmb.2	TC0100000635.mm.1	541.193	617.374	430.539	401.707	765.363	467.882	621.668	652.575	villin 1	Multiple_Complex
Rqcd1	NM_021383; ENSMUST00000087215; ENSMUST00000137100; ENSMUST00000147810; BC050898; BC051948; NM_021383.5; OTTMUST00000051585; OTTMUST00000051586; OTTMUST00000051587; uc007bmf.2	TC0100000636.mm.1	3444.31	3516.68	3396.89	3420.52	6746.86	4870.99	4544.8	3492.39	rcd1 (required for cell differentiation) homolog 1 (S. pombe)	Multiple_Complex
Plcd4	NM_001081456; NM_148937; ENSMUST00000027362; ENSMUST00000067916; ENSMUST00000113745; ENSMUST00000113747; ENSMUST00000113749; ENSMUST00000113750; ENSMUST00000135111; ENSMUST00000141412; ENSMUST00000152707; BC066156; NM_001081456.1; NM_148937.2; OTTMUST00000051213; OTTMUST00000051214; OTTMUST00000051215; OTTMUST00000051216; OTTMUST00000051217; OTTMUST00000051218; OTTMUST00000051219; uc007bmg.1; uc0…	TC0100000637.mm.1	238.856	212.306	218.275	221.322	74.028	89.2636	61.8199	113.772	phospholipase C, delta 4	Multiple_Complex
Bcs1l	NM_025784; ENSMUST00000027358; ENSMUST00000113732; ENSMUST00000113733; ENSMUST00000147464; BC019781; NM_025784.4; OTTMUST00000051600; OTTMUST00000051601; OTTMUST00000051602; OTTMUST00000051603	TC0100000638.mm.1	266.871	207.937	230.72	219.793	174.853	151.167	98.36	272.479	BCS1-like (yeast)	Multiple_Complex
Stk36	NM_175031; ENSMUST00000087183; ENSMUST00000087186; ENSMUST00000113694; ENSMUST00000123154; ENSMUST00000145673; ENSMUST00000148456; ENSMUST00000155473; ENSMUST00000157007; BC043103; BC058698; NM_175031.3; OTTMUST00000051614; OTTMUST00000051615; OTTMUST00000051616; OTTMUST00000051619; OTTMUST00000051620; OTTMUST00000051621; OTTMUST00000051622; OTTMUST00000051623; uc007bmu.1; uc007bmv.1; uc007bmw.1;…	TC0100000639.mm.1	333.144	335.461	221.322	194.012	533.742	328.557	372.217	362.039	serine/threonine kinase 36	Multiple_Complex
Ttll4	NM_001014974; ENSMUST00000042125; ENSMUST00000113678; ENSMUST00000128891; ENSMUST00000129890; ENSMUST00000140591; ENSMUST00000141119; ENSMUST00000143790; ENSMUST00000143925; ENSMUST00000145132; ENSMUST00000153636; ENSMUST00000155753; BC085151; NM_001014974.1; OTTMUST00000051630; OTTMUST00000051631; OTTMUST00000051632; OTTMUST00000051633; OTTMUST00000051634; OTTMUST00000051635; OTTMUST00000051636;…	TC0100000640.mm.1	2916.45	2876.3	3326.99	2936.74	4211.15	2778.33	1097.5	1758.34	tubulin tyrosine ligase-like family, member 4	Multiple_Complex
Cdk5r2	NM_009872; ENSMUST00000160379; BC157046; NM_009872.3; OTTMUST00000088334; uc007bng.2	TC0100000648.mm.1	49.18	39.3966	43.7133	41.0696	72.5046	66.257	60.1295	57.68	cyclin-dependent kinase 5, regulatory subunit 2 (p39); Synthetic construct Mus musculus clone IMAGE:100063282, MGC:191052 cyclin-dependent kinase 5, regulatory subunit 2 (p39) (Cdk5r2) mRNA, encodes complete protein.	Multiple_Complex
Zfand2b	NM_001159905; NM_001159906; NM_026846; ENSMUST00000027394; ENSMUST00000160033; ENSMUST00000160282; ENSMUST00000160439; ENSMUST00000160903; ENSMUST00000161106; ENSMUST00000161657; ENSMUST00000162768; BC011495; NM_001159905.1; NM_001159906.1; NM_026846.3; OTTMUST00000088510; OTTMUST00000088511; OTTMUST00000088512; OTTMUST00000088513; OTTMUST00000088515; OTTMUST00000088516; OTTMUST00000088517; OTTMU…	TC0100000653.mm.1	105.42	107.635	90.5097	101.125	90.5097	109.137	165.421	73.0089	zinc finger, AN1 type domain 2B	Multiple_Complex
Ankzf1	NM_001267620; NM_026187; NR_051998; NR_051999; ENSMUST00000127625; ENSMUST00000127860; ENSMUST00000131788; ENSMUST00000134233; ENSMUST00000134378; ENSMUST00000145459; ENSMUST00000151887; ENSMUST00000152233; BC150879; NM_026187.4; OTTMUST00000051179; OTTMUST00000051180; OTTMUST00000051181; OTTMUST00000051183; OTTMUST00000051184; OTTMUST00000051185; OTTMUST00000051187; uc029qpe.1; uc029qpf.1; uc029…	TC0100000654.mm.1	109.137	109.896	108.383	113.772	74.5429	74.028	69.551	86.2229	ankyrin repeat and zinc finger domain containing 1; ankyrin repeat and zinc finger domain containing 1 (Ankzf1), transcript variant 3, non-coding RNA.	Multiple_Complex
Stk16	NM_001277992; NM_011494; NR_102731; ENSMUST00000027401; ENSMUST00000123825; ENSMUST00000126328; ENSMUST00000131738; ENSMUST00000135484; ENSMUST00000139627; ENSMUST00000142052; ENSMUST00000144355; ENSMUST00000145144; ENSMUST00000156012; BC005703; BC028999; NM_011494.5; OTTMUST00000073490; OTTMUST00000073491; OTTMUST00000073492; OTTMUST00000073493; OTTMUST00000073494; OTTMUST00000073495; OTTMUST000…	TC0100000655.mm.1	770.686	814.629	1152.06	1314.23	154.343	192.672	77.1717	229.126	serine/threonine kinase 16; serine/threonine kinase 16 (Stk16), mRNA.	Multiple_Complex
Dnajb2	NM_001159883; NM_001159884; NM_001159885; NM_020266; NM_178055; ENSMUST00000055223; ENSMUST00000082158; BC011090; NM_001159883.1; NM_001159884.1; NM_001159885.1; NM_020266.2; NM_178055.4; uc007bom.2; uc007bon.2; uc007boo.2; uc007bop.2; uc011wnm.1	TC0100000656.mm.1	55.3304	60.5477	60.5477	57.68	62.2499	75.0614	57.68	58.0812	DnaJ (Hsp40) homolog, subfamily B, member 2	Multiple_Complex
Des	NM_010043; ENSMUST00000027409; ENSMUST00000125948; ENSMUST00000144894; BC031760; NM_010043.1; OTTMUST00000046346; OTTMUST00000046347; OTTMUST00000046348; uc007box.1	TC0100000657.mm.1	16.9123	18.0009	19.2929	19.1597	23.1029	25.4572	23.4254	18.1261	desmin	Multiple_Complex
Speg	NM_001085370; NM_001085371; NM_001173477; NM_007463; ENSMUST00000087122; ENSMUST00000113587; ENSMUST00000113588; ENSMUST00000113589; ENSMUST00000113590; ENSMUST00000122266; ENSMUST00000125118; ENSMUST00000125306; ENSMUST00000132222; ENSMUST00000132228; ENSMUST00000137868; ENSMUST00000143679; ENSMUST00000146705; ENSMUST00000148515; NM_001085370.1; NM_001085371.1; NM_001173477.1; NM_007463.4; OTTMU…	TC0100000658.mm.1	26.9087	26.1729	28.6408	29.8571	35.7532	39.9466	34.0598	31.3414	SPEG complex locus	Multiple_Complex
Gmppa	NM_133708; ENSMUST00000037796; ENSMUST00000113584; ENSMUST00000124539; ENSMUST00000131545; ENSMUST00000132291; ENSMUST00000133418; ENSMUST00000135453; ENSMUST00000140287; ENSMUST00000141124; ENSMUST00000143730; ENSMUST00000144874; ENSMUST00000145166; BC008116; NM_133708.3; OTTMUST00000046364; OTTMUST00000046365; OTTMUST00000046366; OTTMUST00000046367; OTTMUST00000046368; OTTMUST00000046369; OTTMU…	TC0100000659.mm.1	39.6706	50.2134	39.9466	35.0174	47.8352	46.2057	36.5044	63.1189	GDP-mannose pyrophosphorylase A	Multiple_Complex
Stk11ip	NM_027886; ENSMUST00000027414; ENSMUST00000113553; ENSMUST00000129652; ENSMUST00000129794; ENSMUST00000140963; ENSMUST00000146575; ENSMUST00000150560; ENSMUST00000154303; ENSMUST00000156838; BC061635; NM_027886.3; OTTMUST00000046356; OTTMUST00000046357; OTTMUST00000046358; OTTMUST00000046359; OTTMUST00000046360; OTTMUST00000046361; OTTMUST00000046362; OTTMUST00000046363; OTTMUST00000078147; uc007…	TC0100000663.mm.1	100.427	95.6704	103.25	95.6704	48.5029	60.9688	51.6251	56.8859	serine/threonine kinase 11 interacting protein	Multiple_Complex
Gm15183	ENSMUST00000118933	TC0100000664.mm.1	13.5479	14.6213	15.8895	16.4498	13.3614	16.1113	17.8766	14.42	predicted gene 15183 [Source:MGI Symbol;Acc:MGI:3705481]	Multiple_Complex
Slc4a3	NM_009208; ENSMUST00000027415; ENSMUST00000124341; ENSMUST00000129703; ENSMUST00000132110; ENSMUST00000132612; ENSMUST00000138814; ENSMUST00000142257; ENSMUST00000145258; ENSMUST00000145516; ENSMUST00000150142; ENSMUST00000154101; BC080271; NM_009208.3; OTTMUST00000046376; OTTMUST00000046377; OTTMUST00000046378; OTTMUST00000046379; OTTMUST00000046380; OTTMUST00000046381; OTTMUST00000046382; OTTMU…	TC0100000665.mm.1	51.2685	54.9482	61.8199	63.1189	53.4456	56.1028	50.5626	39.3966	solute carrier family 4 (anion exchanger), member 3	Multiple_Complex
Gm15180	ENSMUST00000117745	TC0100000666.mm.1	26.7228	31.779	24.9333	38.5859	31.3414	21.8566	38.3193	27.8576	predicted gene 15180 [Source:MGI Symbol;Acc:MGI:3705360]	Multiple_Complex
Gm15182; LOC100862333	ENSMUST00000120832; XM_003688769.1	TC0100000667.mm.1	32.6724	33.1285	39.1245	40.7859	44.6318	41.3553	42.5179	40.2244	predicted gene 15182 [Source:MGI Symbol;Acc:MGI:3705533]; PREDICTED: zinc finger protein 99-like (LOC100862333), mRNA.	Multiple_Complex
Mogat1	NM_026713; ENSMUST00000012331; ENSMUST00000113524; ENSMUST00000125458; ENSMUST00000134947; ENSMUST00000149732; ENSMUST00000152111; BC106135; NM_026713.3; OTTMUST00000053006; OTTMUST00000053007; OTTMUST00000053008; OTTMUST00000053009; OTTMUST00000053010; uc007bqk.1; uc007bql.2; uc007bqm.2	TC0100000681.mm.1	30.4844	33.5909	31.779	34.7755	39.3966	37.014	39.6706	33.8246	monoacylglycerol O-acyltransferase 1	Multiple_Complex
Utp14b; Acsl3	NM_001001981; NM_001033606; NM_001136222; NM_001136226; NM_028817; ENSMUST00000035779; ENSMUST00000053760; ENSMUST00000132997; ENSMUST00000134566; ENSMUST00000135642; ENSMUST00000142704; ENSMUST00000148608; ENSMUST00000151622; ENSMUST00000154777; BC031529; BC141102; NM_001001981.3; NM_001033606.2; NM_001136222.1; NM_001136226.1; NM_028817.3; OTTMUST00000082782; OTTMUST00000082783; OTTMUST00000082…	TC0100000682.mm.1	1606.83	1584.71	1428.22	1278.29	568.1	487.751	596.344	1541.37	UTP14, U3 small nucleolar ribonucleoprotein, homolog B (yeast); acyl-CoA synthetase long-chain family member 3	Multiple_Complex
Nyap2	NM_172849; ENSMUST00000068275; ENSMUST00000113494; ENSMUST00000123285; ENSMUST00000123720; ENSMUST00000137862; BC082310; NM_172849.3; OTTMUST00000066074; OTTMUST00000066075; OTTMUST00000066076; OTTMUST00000066077; OTTMUST00000066078; uc007brj.1; uc007brk.1; uc007brl.1; uc007brm.1; uc007brn.1	TC0100000697.mm.1	17.6305	18.0009	19.2929	20.393	27.6652	24.9333	24.0839	19.5622	neuronal tyrosine-phophorylated phosphoinositide 3-kinase adaptor 2	Multiple_Complex
Rhbdd1	NM_001122685; NM_029777; ENSMUST00000027322; ENSMUST00000140020; BC005518; NM_001122685.1; NM_029777.3; OTTMUST00000050884; OTTMUST00000050885; uc007brq.3; uc007brr.2	TC0100000703.mm.1	93.7015	97.6806	72.0037	82.7106	63.1189	69.0706	52.7098	97.0059	rhomboid domain containing 1	Multiple_Complex
Col4a3	NM_007734; ENSMUST00000113457; ENSMUST00000125563; ENSMUST00000141994; ENSMUST00000152664; NM_007734.2; OTTMUST00000051474; OTTMUST00000051475; OTTMUST00000051476; OTTMUST00000051477; uc007bru.1; uc007brv.1	TC0100000706.mm.1	20.9663	21.7057	22.0087	24.9333	35.0174	34.2968	30.91	29.446	collagen, type IV, alpha 3	Multiple_Complex
Mff	NM_029409; ENSMUST00000073025; ENSMUST00000078332; ENSMUST00000159279; ENSMUST00000160044; ENSMUST00000160632; ENSMUST00000160744; ENSMUST00000160750; ENSMUST00000160786; ENSMUST00000160972; ENSMUST00000161572; ENSMUST00000161648; ENSMUST00000162003; ENSMUST00000162056; ENSMUST00000162573; ENSMUST00000162794; BC016597; BC059229; NM_029409.2; OTTMUST00000088341; OTTMUST00000088342; OTTMUST00000088…	TC0100000708.mm.1	512	487.751	445.722	501.463	1499.22	1360.57	1389.16	1052.79	mitochondrial fission factor	Multiple_Complex
Agfg1	NM_010472; ENSMUST00000063380; ENSMUST00000113444; BC031154; NM_010472.2; uc007bse.1; uc007bsf.1; uc007bsg.1; uc007bsh.1	TC0100000711.mm.1	6251.56	6382.92	4299.64	4389.98	4451.27	3691.52	6936.54	7750.1	ArfGAP with FG repeats 1	Multiple_Complex
Krtap28-13	XM_896507.2	TC0100000717.mm.1	14.723	16.2234	15.8895	16.9123	20.393	19.8353	22.1618	16.6795	PREDICTED: keratin associated protein 28-13 (Krtap28-13), mRNA.	Multiple_Complex
Daw1	NM_027725; NR_027636; ENSMUST00000065403; ENSMUST00000065436; ENSMUST00000113436; ENSMUST00000133079; ENSMUST00000149342; BC145995; NM_027725.3; NR_027636.1; OTTMUST00000055298; OTTMUST00000055299; OTTMUST00000055300; OTTMUST00000064965; OTTMUST00000064966; uc007bsn.2; uc007bso.2; uc011wob.1	TC0100000719.mm.1	50.5626	58.4852	40.7859	37.5307	66.7178	69.551	45.8866	158.683	dynein assembly factor with WDR repeat domains 1	Multiple_Complex
Fbxo36	NM_025386; ENSMUST00000097672; ENSMUST00000139562; ENSMUST00000143656; ENSMUST00000151737; BC049581; NM_025386.3; OTTMUST00000050898; OTTMUST00000050899; OTTMUST00000050900; OTTMUST00000050901; uc007btc.2	TC0100000725.mm.1	165.421	165.421	133.436	118.603	85.6274	71.0124	101.125	122.786	F-box protein 36	Multiple_Complex
Rpl19-ps1	OTTMUST00000051265	TC0100000734.mm.1	47643.8	44453.2	47975.2	52136.3	1964.57	2164.77	16961.8	25355.3	ribosomal protein L19, pseudogene 1	Multiple_Complex
Gm16026	ENSMUST00000113408	TC0100003863.mm.1	34159.5	29944.4	38698.8	45703	11346.8	13216	17438.6	22226.6	predicted pseudogene 16026	Multiple_Complex
Gm6264	ENSMUST00000160802; ENSMUST00000162896	TC0100000742.mm.1	7434.4	7033.37	6793.79	7131.55	3590.58	3304	6793.79	4672.57	predicted gene 6264 [Source:MGI Symbol;Acc:MGI:3779580]	Multiple_Complex
Gm7609	NM_001081746; NM_001081746.1; uc007btq.1; uc007btr.1	TC0100000743.mm.1	240.518	213.783	190.019	219.793	97.0059	110.661	116.97	268.727	predicted pseudogene 7609	Multiple_Complex
Gm7592; Csprs	ENSMUST00000159601; XM_979370.3; uc007bty.1	TC0100000758.mm.1	282.088	249	221.322	196.72	119.428	112.206	114.563	268.727	predicted gene 7592; component of Sp100-rs	Multiple_Complex
Sp140	NM_001013817; ENSMUST00000080204; ENSMUST00000113385; ENSMUST00000159234; ENSMUST00000160119; ENSMUST00000161497; ENSMUST00000162925; BC069971; NM_001013817.2; OTTMUST00000074815; OTTMUST00000074816; OTTMUST00000074817; OTTMUST00000074899; OTTMUST00000074900; OTTMUST00000074901; uc007buc.1	TC0100000765.mm.1	6746.86	6165.49	6295.04	7332.05	3304	2957.17	5914.33	4039.61	Sp140 nuclear body protein	Multiple_Complex
Sp100	NM_013673; ENSMUST00000054279; ENSMUST00000066427; ENSMUST00000129951; ENSMUST00000132641; ENSMUST00000134283; ENSMUST00000140758; ENSMUST00000141709; ENSMUST00000141998; ENSMUST00000145440; ENSMUST00000147552; ENSMUST00000150967; ENSMUST00000153574; ENSMUST00000155094; BC069183; NM_013673.3; OTTMUST00000074495; OTTMUST00000074496; OTTMUST00000074497; OTTMUST00000074498; OTTMUST00000074554; OTTMU…	TC0100000766.mm.1	39.9466	42.5179	37.5307	38.8542	49.5221	58.892	44.9422	42.2243	nuclear antigen Sp100	Multiple_Complex
Cab39	NM_133781; ENSMUST00000097666; ENSMUST00000113360; ENSMUST00000126962; ENSMUST00000130754; BC020041; NM_133781.4; OTTMUST00000051256; OTTMUST00000051257; OTTMUST00000051258; OTTMUST00000051259; uc007bum.2	TC0100000771.mm.1	2977.74	2702.35	2998.45	3104.19	1924.14	1686.71	1408.55	2288.2	calcium binding protein 39	Multiple_Complex
Itm2c	NM_022417; ENSMUST00000027425; ENSMUST00000139837; BC012952; NM_022417.3; OTTMUST00000074348; OTTMUST00000074349; uc011wof.1	TC0100000774.mm.1	79.3413	113.772	89.2636	79.8932	115.36	149.086	106.891	89.8845	integral membrane protein 2C	Multiple_Complex
4933407L21Rik	NR_037692; NR_037692.1; uc007bup.2	TC0100000775.mm.1	17.5087	18.7654	17.5087	21.8566	21.1121	25.8125	23.9176	20.5348	RIKEN cDNA 4933407L21 gene	Multiple_Complex
Spata3	NM_001122732; NM_027029; NM_027300; NM_028647; ENSMUST00000052854; ENSMUST00000113344; ENSMUST00000125083; ENSMUST00000129169; ENSMUST00000130504; ENSMUST00000131151; ENSMUST00000135440; ENSMUST00000149469; ENSMUST00000152501; ENSMUST00000153247; ENSMUST00000159876; BC061025; NM_001122732.1; NM_027029.2; NM_027300.3; NM_028647.4; OTTMUST00000066171; OTTMUST00000066172; OTTMUST00000066173; OTTMUST…	TC0100000777.mm.1	14.3204	14.9285	16.4498	15.6707	18.507	21.7057	24.2515	16.4498	spermatogenesis associated 3	Multiple_Complex
Psmd1	NM_027357; ENSMUST00000027432; ENSMUST00000127104; ENSMUST00000133480; ENSMUST00000139715; ENSMUST00000143200; ENSMUST00000147807; ENSMUST00000149946; ENSMUST00000152184; BC138526; BC138527; NM_027357.2; OTTMUST00000085651; OTTMUST00000085652; OTTMUST00000085663; OTTMUST00000085664; OTTMUST00000085665; OTTMUST00000085666; OTTMUST00000085667; OTTMUST00000085669; uc007buy.1	TC0100003864.mm.1	797.865	797.865	643.591	576.03	388.023	306.555	280.139	929.3	proteasome (prosome, macropain) 26S subunit, non-ATPase, 1	Multiple_Complex
Armc9	NM_027456; NM_030184; ENSMUST00000027434; ENSMUST00000113309; ENSMUST00000123618; ENSMUST00000126579; ENSMUST00000131412; ENSMUST00000134858; ENSMUST00000135973; ENSMUST00000150059; ENSMUST00000153389; ENSMUST00000153653; ENSMUST00000155168; ENSMUST00000156675; BC028964; BC043101; NM_027456.1; NM_030184.2; OTTMUST00000085605; OTTMUST00000085606; OTTMUST00000085607; OTTMUST00000085608; OTTMUST0000…	TC0100003865.mm.1	58.892	54.1917	54.5686	54.1917	46.5271	41.9326	41.0696	48.8403	armadillo repeat containing 9	Multiple_Complex
B3gnt7	NM_145222; ENSMUST00000113306; BC031187; BC060507; NM_145222.2; uc007bvk.2	TC0100000783.mm.1	60.1295	48.1679	59.7141	58.0812	106.153	100.427	64.8934	89.8845	UDP-GlcNAc:betaGal beta-1,3-N-acetylglucosaminyltransferase 7	Multiple_Complex
Cops7b	NM_172974; ENSMUST00000027446; ENSMUST00000121534; ENSMUST00000122884; ENSMUST00000127219; ENSMUST00000138280; ENSMUST00000149542; BC012659; NM_172974.2; OTTMUST00000067485; OTTMUST00000067486; OTTMUST00000067487; OTTMUST00000067488; OTTMUST00000067546; uc007bvr.1; uc007bvs.1	TC0100000792.mm.1	749.612	739.292	754.826	843.357	803.414	630.346	916.506	765.363	COP9 (constitutive photomorphogenic) homolog, subunit 7b (Arabidopsis thaliana)	Multiple_Complex
Dis3l2	NM_001172157; NM_153530; ENSMUST00000065694; ENSMUST00000168237; BC036177; NM_001172157.1; NM_153530.2; uc007bvu.2; uc007bvv.2; uc007bvw.2	TC0100000794.mm.1	65.3448	71.0124	56.8859	54.1917	85.6274	73.0089	56.493	86.8227	DIS3 mitotic control homolog (S. cerevisiae)-like 2	Multiple_Complex
Prss56	NM_027084; ENSMUST00000044533; NM_027084.1; OTTMUST00000084503; uc007bwe.2	TC0100000808.mm.1	20.5348	21.1121	23.4254	21.8566	26.3549	28.0514	27.8576	21.8566	protease, serine 56	Multiple_Complex
Efhd1	NM_028889; ENSMUST00000027472; ENSMUST00000118687; ENSMUST00000150831; BC019531; BC085088; NM_028889.2; OTTMUST00000073234; OTTMUST00000073235; OTTMUST00000073236; uc007bwo.1	TC0100000813.mm.1	685.019	661.685	372.217	364.557	98.36	84.4485	184.823	393.44	EF hand domain containing 1	Multiple_Complex
Gigyf2	NM_001110212; NM_146112; ENSMUST00000027475; ENSMUST00000164992; ENSMUST00000172736; ENSMUST00000172776; ENSMUST00000172794; ENSMUST00000172964; ENSMUST00000172976; ENSMUST00000173148; ENSMUST00000173152; ENSMUST00000173173; ENSMUST00000173235; ENSMUST00000173636; ENSMUST00000173663; ENSMUST00000173850; ENSMUST00000174334; ENSMUST00000174482; ENSMUST00000174501; ENSMUST00000174535; ENSMUST0000017…	TC0100000814.mm.1	781.445	786.88	704.277	564.175	222.861	181.019	141.044	377.413	GRB10 interacting GYF protein 2	Multiple_Complex
Inpp5d	NM_001110192; NM_001110193; NM_010566; ENSMUST00000042275; ENSMUST00000072999; ENSMUST00000163222; ENSMUST00000163548; ENSMUST00000163576; ENSMUST00000164592; ENSMUST00000165554; ENSMUST00000167032; ENSMUST00000168783; ENSMUST00000169754; ENSMUST00000170300; BC108328; NM_001110192.1; NM_001110193.1; NM_010566.2; OTTMUST00000091932; OTTMUST00000091933; OTTMUST00000091934; OTTMUST00000091935; OTTMU…	TC0100000822.mm.1	58.892	55.7152	51.9842	57.68	115.36	113.772	85.0359	69.551	inositol polyphosphate-5-phosphatase D	Multiple_Complex
Atg16l1	NM_001205391; NM_001205392; NM_029846; ENSMUST00000027512; ENSMUST00000113186; ENSMUST00000113190; ENSMUST00000127884; ENSMUST00000129431; ENSMUST00000133072; ENSMUST00000134603; ENSMUST00000137638; ENSMUST00000139628; ENSMUST00000144047; ENSMUST00000151037; BC049122; NM_001205391.1; NM_001205392.1; NM_029846.4; OTTMUST00000039677; OTTMUST00000039678; OTTMUST00000039679; OTTMUST00000039680; OTTMU…	TC0100000824.mm.1	430.539	424.612	342.509	282.088	106.153	93.7015	78.7932	245.572	autophagy related 16-like 1 (S. cerevisiae)	Multiple_Complex
Sag	NM_009118; ENSMUST00000077772; ENSMUST00000128761; ENSMUST00000130886; ENSMUST00000136708; ENSMUST00000144334; ENSMUST00000145385; ENSMUST00000155393; ENSMUST00000156381; ENSMUST00000177757; BC016498; NM_009118.2; OTTMUST00000051793; OTTMUST00000051794; OTTMUST00000051795; OTTMUST00000051796; OTTMUST00000051797; OTTMUST00000051798; OTTMUST00000051799; OTTMUST00000051800; uc007bxp.1; uc007bxq.1; u…	TC0100000828.mm.1	28.443	30.2738	36.2523	35.261	42.5179	45.8866	38.0546	40.7859	S-antigen, retina and pineal gland (arrestin)	Multiple_Complex
Ugt1a2; Ugt1a6a; Ugt1a6b; Ugt1a10; Ugt1a7c; Ugt1a5; Ugt1a9; Ugt1a1	NM_013701; NM_145079; NM_201410; NM_201641; NM_201642; NM_201643; NM_201644; NM_201645; ENSMUST00000014263; ENSMUST00000049289; ENSMUST00000058237; ENSMUST00000073049; ENSMUST00000073772; ENSMUST00000097659; ENSMUST00000113134; ENSMUST00000113135; ENSMUST00000113137; ENSMUST00000113138; ENSMUST00000113142; ENSMUST00000124852; ENSMUST00000126203; ENSMUST00000138182; ENSMUST00000140092; ENSMUST0000…	TC0100000836.mm.1	21.1121	22.6274	23.7524	23.2636	28.0514	27.6652	28.2465	21.8566	UDP glucuronosyltransferase 1 family, polypeptide A2; UDP glucuronosyltransferase 1 family, polypeptide A6A; UDP glucuronosyltransferase 1 family, polypeptide A6B; UDP glycosyltransferase 1 family, polypeptide A10; UDP glucuronosyltransferase 1 family, polypeptide A7C; UDP glucuronosyltransferase 1 family, polypeptide A5; UDP glucuronosyltransferase 1 family, polypeptide A9; UDP glucuronosyltrans…	Multiple_Complex
Gm15373	ENSMUST00000121495	TC0100000837.mm.1	27.0958	34.2968	31.3414	30.4844	47.5048	38.5859	39.1245	36.5044	predicted gene 15373 [Source:MGI Symbol;Acc:MGI:3707583]	Multiple_Complex
Gm15372	ENSMUST00000120729	TC0100000838.mm.1	11.4716	12.4666	12.8171	11.9588	17.2677	30.4844	19.6983	15.455	predicted gene 15372 [Source:MGI Symbol;Acc:MGI:3707469]	Multiple_Complex
Gm15370	ENSMUST00000117158	TC0100000839.mm.1	23.9176	32.8996	28.6408	28.6408	48.1679	57.2816	48.5029	35.7532	predicted gene 15370 [Source:MGI Symbol;Acc:MGI:3707467]	Multiple_Complex
Gm15369	ENSMUST00000119681	TC0100000840.mm.1	20.393	20.6776	26.5382	22.7848	30.0647	34.7755	28.6408	25.8125	predicted gene 15369 [Source:MGI Symbol;Acc:MGI:3707466]	Multiple_Complex
Gm15374	ENSMUST00000119313	TC0100000841.mm.1	16.2234	16.7955	19.5622	17.7531	38.5859	25.1067	22.6274	19.2929	predicted gene 15374 [Source:MGI Symbol;Acc:MGI:3707463]	Multiple_Complex
Gm15371	ENSMUST00000117057	TC0100000842.mm.1	23.2636	17.3878	23.4254	18.6357	28.2465	39.6706	31.3414	25.2813	predicted gene 15371 [Source:MGI Symbol;Acc:MGI:3707464]	Multiple_Complex
Mroh2a	NM_001281466; ENSMUST00000061013; ENSMUST00000113130; ENSMUST00000135948; ENSMUST00000142632; ENSMUST00000148474; NM_001177364.1; OTTMUST00000049203; OTTMUST00000049204; OTTMUST00000049205; OTTMUST00000049206; uc011wov.1	TC0100000845.mm.1	22.3159	23.4254	23.5883	25.2813	27.6652	28.2465	31.3414	24.59	maestro heat-like repeat family member 2A	Multiple_Complex
Trpm8	NM_134252; ENSMUST00000040210; ENSMUST00000113114; ENSMUST00000148138; ENSMUST00000171176; BC117934; NM_134252.3; OTTMUST00000046774; OTTMUST00000046902; OTTMUST00000046903; uc029qrk.1; uc029qrl.1	TC0100000846.mm.1	15.8895	14.9285	18.507	17.8766	23.9176	27.6652	24.0839	17.0299	transient receptor potential cation channel, subfamily M, member 8	Multiple_Complex
Sh3bp4	NM_133816; ENSMUST00000066279; ENSMUST00000123745; BC012284; BC034733; NM_133816.2; OTTMUST00000072746; OTTMUST00000072747; uc007byv.1	TC0100000854.mm.1	60.5477	67.1819	48.8403	54.5686	133.436	125.366	52.3457	117.784	SH3-domain binding protein 4	Multiple_Complex
Agap1	NM_001037136; NM_178119; ENSMUST00000027521; ENSMUST00000074945; BC172673; NM_001037136.1; NM_178119.3; uc007byw.1; uc007byx.1; uc007byy.1; uc011wpa.1	TC0100000858.mm.1	461.44	458.253	304.437	308.687	1192.69	831.746	849.223	1105.13	ArfGAP with GTPase domain, ankyrin repeat and PH domain 1; Synthetic construct Mus musculus clone IMAGE:100069481, MGC:199383 ArfGAP with GTPase domain, ankyrin repeat and PH domain 1 (Agap1) mRNA, encodes complete protein.	Multiple_Complex
D130058E05Rik; RP23-118M14.1	ENSMUST00000173856; OTTMUST00000096175	TC0100000868.mm.1	16	15.3482	16.1113	17.6305	18.507	19.1597	16.1113	16.3362	RIKEN cDNA D130058E05 gene [Source:MGI Symbol;Acc:MGI:2444614]; novel protein	Multiple_Complex
Mlph	NM_053015; ENSMUST00000027528; ENSMUST00000125149; ENSMUST00000136220; BC150804; NM_053015.3; OTTMUST00000053516; OTTMUST00000053517; OTTMUST00000053518; uc007bzm.2	TC0100000882.mm.1	23.7524	25.6342	26.1729	26.1729	31.125	36.7583	29.6508	32.6724	melanophilin	Multiple_Complex
Ramp1	NM_001168392; NM_016894; NM_178401; ENSMUST00000097648; ENSMUST00000165855; BC012644; NM_001168392.1; NM_016894.3; NM_178401.3; uc007bzw.2; uc007bzx.2; uc011wpf.1	TC0100000886.mm.1	21.8566	21.8566	21.7057	22.1618	24.0839	24.4201	26.9087	24.0839	receptor (calcitonin) activity modifying protein 1	Multiple_Complex
Scly	NM_016717; ENSMUST00000027532; ENSMUST00000123651; ENSMUST00000124832; ENSMUST00000137074; ENSMUST00000142488; ENSMUST00000142802; ENSMUST00000145843; ENSMUST00000147523; ENSMUST00000153621; ENSMUST00000154045; BC019879; BC021389; NM_016717.3; OTTMUST00000053551; OTTMUST00000053552; OTTMUST00000053553; OTTMUST00000053554; OTTMUST00000053555; OTTMUST00000053556; OTTMUST00000053557; OTTMUST00000053…	TC0100000892.mm.1	48.1679	44.3235	49.18	54.1917	46.2057	50.2134	37.7918	43.4113	selenocysteine lyase	Multiple_Complex
Klhl30	NM_027551; ENSMUST00000027533; BC115428; BC115429; NM_027551.2; OTTMUST00000066168; uc007cai.1	TC0100000894.mm.1	22.7848	27.0958	24.0839	24.761	29.2426	31.3414	29.446	30.0647	kelch-like 30	Multiple_Complex
Asb1	NM_001039126; NM_023046; ENSMUST00000027538; ENSMUST00000086843; NM_001039126.2; NM_023046.4; uc007caz.1; uc007cba.1; uc007cbb.3; uc007cbc.1	TC0100000898.mm.1	23.5883	22.7848	24.59	24.9333	29.8571	34.5353	30.91	24.761	ankyrin repeat and SOCS box-containing 1	Multiple_Complex
Rnpepl1	NM_181405; ENSMUST00000027487; ENSMUST00000178116; ENSMUST00000178361; ENSMUST00000178662; ENSMUST00000178778; ENSMUST00000178816; ENSMUST00000179127; ENSMUST00000179531; ENSMUST00000179711; ENSMUST00000179837; ENSMUST00000179854; ENSMUST00000179993; ENSMUST00000180306; BC031789; NM_181405.4; OTTMUST00000111572; OTTMUST00000111573; OTTMUST00000111574; OTTMUST00000111575; OTTMUST00000111576; OTTMU…	TC0100000921.mm.1	36.7583	39.3966	38.0546	35.7532	36.0019	39.6706	36.0019	30.2738	arginyl aminopeptidase (aminopeptidase B)-like 1	Multiple_Complex
Capn10	NM_011796; ENSMUST00000027488; ENSMUST00000117814; ENSMUST00000128429; ENSMUST00000136598; ENSMUST00000152983; ENSMUST00000153828; BC005681; BC010969; NM_011796.2; OTTMUST00000065210; OTTMUST00000065211; OTTMUST00000065212; OTTMUST00000065213; OTTMUST00000065214; OTTMUST00000065215; uc007cbx.1; uc007cby.1	TC0100000922.mm.1	75.5835	80.4489	53.0765	51.2685	52.3457	47.8352	101.125	79.3413	calpain 10	Multiple_Complex
Crocc2	ENSMUST00000138595	TC0100000926.mm.1	25.4572	27.0958	25.6342	25.6342	26.1729	27.0958	27.0958	26.9087	ciliary rootlet coiled-coil, rootletin family member 2	Multiple_Complex
Sned1; Mir6901	NM_172463; NR_105866; ENSMUST00000062202; ENSMUST00000163688; ENSMUST00000165843; ENSMUST00000165883; ENSMUST00000168122; ENSMUST00000172289; BC145886; NM_172463.4; OTTMUST00000093349; OTTMUST00000093350; OTTMUST00000093351; OTTMUST00000093352; OTTMUST00000093353; OTTMUST00000093354; uc007cdn.1; uc007cdm.1	TC0100000927.mm.1	26.5382	25.6342	25.6342	25.2813	29.6508	30.0647	27.0958	24.4201	sushi, nidogen and EGF-like domains 1; microRNA 6901; sushi, nidogen and EGF-like domains 1 (Sned1), mRNA.	Multiple_Complex
Sept2	NM_001159717; NM_001159718; NM_001159719; NM_010891; ENSMUST00000027495; ENSMUST00000112912; ENSMUST00000129211; ENSMUST00000131175; ENSMUST00000136182; ENSMUST00000142401; ENSMUST00000149532; ENSMUST00000150931; ENSMUST00000152476; ENSMUST00000152778; ENSMUST00000153826; ENSMUST00000157021; ENSMUST00000168776; ENSMUST00000172165; ENSMUST00000179353; BC138636; BC138637; NM_001159717.1; NM_0011597…	TC0100000936.mm.1	1782.89	1710.26	1652	1552.09	1629.26	1341.84	867.067	2556.58	septin 2	Multiple_Complex
Atg4b	NM_174874; ENSMUST00000027502; ENSMUST00000135762; ENSMUST00000149436; BC027184; NM_174874.3; OTTMUST00000081166; OTTMUST00000081167; OTTMUST00000081168; uc007cej.1	TC0100000944.mm.1	1552.09	1438.15	1243.34	1217.75	515.561	522.758	278.204	843.357	autophagy related 4B, cysteine peptidase	Multiple_Complex
D2hgdh	NM_178882; ENSMUST00000097633; ENSMUST00000112881; ENSMUST00000141701; ENSMUST00000149397; BC023277; BC117794; NM_178882.3; OTTMUST00000051829; OTTMUST00000051830; OTTMUST00000051831; OTTMUST00000051832; uc007ceo.2; uc007cep.2; uc007ceq.2; uc007cer.2	TC0100000947.mm.1	38.0546	39.9466	35.0174	34.5353	34.2968	34.5353	33.1285	56.8859	D-2-hydroxyglutarate dehydrogenase	Multiple_Complex
Gm7889	XM_980899.3	TC0100000950.mm.1	48.1679	49.18	44.9422	45.8866	57.2816	64.4452	49.5221	147.033	PREDICTED: predicted gene 7889 (Gm7889), mRNA.	Multiple_Complex
Neu4	NM_173772; ENSMUST00000050890; BC070438; NM_173772.3; uc007ceu.1; uc011wpt.1	TC0100000954.mm.1	16.7955	16.6795	17.5087	19.0273	18.507	19.5622	18.6357	17.6305	sialidase 4	Multiple_Complex
Gm7133	XM_981711.2	TC0100000968.mm.1	17.6305	14.723	18.507	18.1261	23.4254	25.9921	32	20.5348	PREDICTED: predicted gene 7133 (Gm7133), mRNA.	Multiple_Complex
Gin1	NM_026250; ENSMUST00000027571; ENSMUST00000112842; ENSMUST00000112844; ENSMUST00000122925; ENSMUST00000138142; BC033572; NM_026250.2; OTTMUST00000050829; OTTMUST00000050830; OTTMUST00000050831; OTTMUST00000050832; OTTMUST00000050833; uc007cfm.1; uc007cfn.1; uc011wpx.1	TC0100000971.mm.1	73.0089	76.1093	77.1717	77.7085	63.5579	66.257	70.5219	80.4489	gypsy retrotransposon integrase 1	Multiple_Complex
Gm7952	ENSMUST00000180540	TC0100000976.mm.1	29.2426	32.6724	27.6652	35.261	41.6429	44.0173	38.3193	27.6652	predicted gene 7952 [Source:MGI Symbol;Acc:MGI:3648772]	Multiple_Complex
Slco6d1	NM_001164233; NM_027584; ENSMUST00000027575; ENSMUST00000160796; ENSMUST00000162468; ENSMUST00000162782; BC112423; BC113131; NM_001164233.1; NM_027584.1; OTTMUST00000073660; OTTMUST00000073661; OTTMUST00000073662; OTTMUST00000073663; uc007cfu.2; uc007cfv.2; uc007cfw.2	TC0100000977.mm.1	18.3792	19.1597	19.4271	22.3159	25.8125	23.1029	32.4467	20.6776	solute carrier organic anion transporter family, member 6d1	Multiple_Complex
2310035C23Rik	NM_029349; NM_173187; ENSMUST00000039173; ENSMUST00000086721; BC117949; BC117950; NM_029349.1; NM_173187.3; uc007cgi.2; uc007cgj.2; uc007cgk.2; uc007cgl.2; uc007cgm.2; uc007cgn.2	TC0100001008.mm.1	188.706	196.72	176.069	159.786	171.255	120.259	70.0348	192.672	RIKEN cDNA 2310035C23 gene	Multiple_Complex
Tnfrsf11a	NM_009399; ENSMUST00000027559; BC019185; NM_009399.3; uc007cgo.1; uc007cgp.1	TC0100001011.mm.1	24.59	22.7848	24.761	25.6342	28.84	33.5909	27.6652	29.0406	tumor necrosis factor receptor superfamily, member 11a, NFKB activator; tumor necrosis factor receptor superfamily, member 11a	Multiple_Complex
Zcchc2	NM_001122675; NM_001122676; ENSMUST00000118196; ENSMUST00000119166; ENSMUST00000131830; NM_001122675.1; NM_001122676.1; OTTMUST00000066616; OTTMUST00000066617; OTTMUST00000066618; uc007cgq.3; uc007cgr.3; uc007cgs.3; uc007cgt.3	TC0100001016.mm.1	1408.55	1499.22	1428.22	1428.22	1820.35	1530.73	1884.54	1686.71	zinc finger, CCHC domain containing 2	Multiple_Complex
Gm26509	ENSMUST00000180947	TC0100001017.mm.1	25.9921	25.6342	20.393	24.9333	69.551	53.0765	42.5179	30.0647	predicted gene, 26509 [Source:MGI Symbol;Acc:MGI:5477003]	Multiple_Complex
Phlpp1	NM_133821; ENSMUST00000061047; ENSMUST00000124895; ENSMUST00000135810; BC059254; NM_133821.3; OTTMUST00000051100; OTTMUST00000051101; OTTMUST00000051102; uc007cgu.2; uc007cgv.2	TC0100001018.mm.1	34.0598	34.5353	32.8996	32	38.5859	37.014	33.8246	41.3553	PH domain and leucine rich repeat protein phosphatase 1	Multiple_Complex
Serpinb12	NM_001199213; NM_027971; ENSMUST00000081277; ENSMUST00000112724; ENSMUST00000126812; BC062134; NM_001199213.1; NM_027971.2; OTTMUST00000049652; OTTMUST00000049653; OTTMUST00000049654; uc007chc.2; uc007chd.2; uc007che.2	TC0100001025.mm.1	48.5029	70.5219	34.5353	38.0546	69.551	50.2134	60.9688	156.498	serine (or cysteine) peptidase inhibitor, clade B (ovalbumin), member 12	Multiple_Complex
Serpinb10	NM_001160307; NM_198028; ENSMUST00000172762; ENSMUST00000173667; ENSMUST00000173703; ENSMUST00000182198; BC029736; BC069938; NM_001160307.1; NM_198028.3; OTTMUST00000049635; OTTMUST00000049636; uc011wqf.1; uc011wqg.1	TC0100003867.mm.1	22.4711	20.9663	23.5883	24.4201	29.446	25.4572	36.0019	23.2636	serine (or cysteine) peptidase inhibitor, clade B (ovalbumin), member 10	Multiple_Complex
Serpinb8	NM_001159748; NM_011459; ENSMUST00000000514; ENSMUST00000112706; ENSMUST00000123086; ENSMUST00000151283; BC025121; NM_001159748.1; NM_011459.4; OTTMUST00000049637; OTTMUST00000049638; OTTMUST00000049639; OTTMUST00000049640; uc007chr.2; uc007chs.2; uc007cht.2	TC0100001031.mm.1	32.2226	32.2226	29.0406	30.2738	42.2243	52.3457	31.5594	34.7755	serine (or cysteine) peptidase inhibitor, clade B, member 8	Multiple_Complex
Cdh7	NM_172853; ENSMUST00000027542; ENSMUST00000112701; ENSMUST00000129923; ENSMUST00000131464; ENSMUST00000134301; ENSMUST00000137092; ENSMUST00000145188; ENSMUST00000146282; ENSMUST00000172005; BC141119; NM_172853.2; OTTMUST00000053580; OTTMUST00000053581; OTTMUST00000053582; OTTMUST00000053583; OTTMUST00000053584; OTTMUST00000053585; OTTMUST00000053618; uc007chv.1; uc007chw.1; uc011wqi.1; uc011wqj.…	TC0100001037.mm.1	16.1113	16.7955	19.1597	18.3792	22.1618	25.8125	25.9921	19.0273	cadherin 7, type 2	Multiple_Complex
Clasp1	NM_001081276; NM_029709; NM_177548; ENSMUST00000049404; ENSMUST00000070989; ENSMUST00000165223; ENSMUST00000178710; BC094432; BC158064; NM_001081276.1; NM_029709.2; NM_177548.2; uc007cid.1; uc007cie.1; uc007cij.2	TC0100001060.mm.1	424.612	522.758	388.023	352.139	533.742	442.643	749.612	455.087	CLIP associating protein 1 (Clasp1), transcript variant 1, mRNA.; CLIP associating protein 1; CLIP associating protein 1 (Clasp1), transcript variant 2, mRNA.	Multiple_Complex
Tfcp2l1	NM_023755; ENSMUST00000027629; BC116663; NM_023755.2; uc007cik.1; uc007cil.1	TC0100001063.mm.1	99.7331	95.6704	89.2636	97.6806	103.968	110.661	135.298	114.563	transcription factor CP2-like 1	Multiple_Complex
Tmem185b	NM_146103; ENSMUST00000069755; ENSMUST00000183607; ENSMUST00000183952; BC024712; NM_146103.2; OTTMUST00000117293; OTTMUST00000117294; uc007ciu.2	TC0100001076.mm.1	106.153	89.2636	81.0084	96.3358	40.7859	38.8542	54.5686	66.7178	transmembrane protein 185B	Multiple_Complex
Gm3851	ENSMUST00000168653	TC0100001078.mm.1	136638	118950	83529.6	90147.5	10441.2	7804.01	44453.2	108701	predicted gene 3851 [Source:MGI Symbol;Acc:MGI:3782023]	Multiple_Complex
Gm8338	ENSMUST00000163928	TC0100001079.mm.1	48.1679	43.4113	40.7859	49.5221	56.493	56.8859	67.1819	55.7152	predicted gene 8338 [Source:MGI Symbol;Acc:MGI:3647186]	Multiple_Complex
Gm17973	ENSMUST00000174509	TC0100001082.mm.1	21.7057	25.2813	22.1618	23.1029	25.6342	23.2636	29.0406	21.5557	predicted gene, 17973 [Source:MGI Symbol;Acc:MGI:5010158]	Multiple_Complex
3110009E18Rik	NM_001172074; NM_028439; ENSMUST00000027637; ENSMUST00000056038; ENSMUST00000112644; ENSMUST00000128578; ENSMUST00000153037; BC028767; NM_001172074.1; NM_028439.2; uc007cjg.1; uc007cjh.2	TC0100001085.mm.1	196.72	184.823	143.013	167.73	481.036	377.413	145.009	481.036	RIKEN cDNA 3110009E18 gene	Multiple_Complex
Ccdc93	NM_001025156; NM_029955; ENSMUST00000036025; ENSMUST00000112621; ENSMUST00000128924; ENSMUST00000152959; ENSMUST00000155673; ENSMUST00000156459; BC054083; NM_001025156.2; NM_029955.3; OTTMUST00000049709; OTTMUST00000049710; OTTMUST00000049711; OTTMUST00000049712; OTTMUST00000049713; OTTMUST00000049714; uc007cjr.1; uc007cjs.1; uc007cju.2; uc011wqw.1	TC0100001096.mm.1	85.6274	77.7085	73.0089	76.6386	64.8934	66.257	53.0765	69.0706	coiled-coil domain containing 93	Multiple_Complex
Gm8217	ENSMUST00000119136	TC0100001097.mm.1	265.028	247.28	243.875	290.018	153.277	183.546	136.239	156.498	predicted gene 8217 [Source:MGI Symbol;Acc:MGI:3646717]	Multiple_Complex
Gm10543	ENSMUST00000097605	TC0100001106.mm.1	17.3878	17.2677	18.2522	21.1121	24.59	30.4844	26.3549	20.6776	predicted gene 10543	Multiple_Complex
		TC0100001108.mm.1	4420.52	3929.15	4211.15	4608.24	6038.61	4420.52	3821.7	4240.45		Multiple_Complex
Gpr39	NM_027677; ENSMUST00000027581; ENSMUST00000159359; BC085285; NM_027677.2; OTTMUST00000074925; OTTMUST00000074931; uc007ckh.2	TC0100001112.mm.1	25.4572	24.761	20.1122	22.0087	31.5594	33.1285	34.7755	25.6342	G protein-coupled receptor 39	Multiple_Complex
Ccnt2	NM_028399; ENSMUST00000027587; ENSMUST00000112570; ENSMUST00000125760; ENSMUST00000126850; ENSMUST00000143513; ENSMUST00000149760; ENSMUST00000153359; BC054122; NM_028399.1; OTTMUST00000051316; OTTMUST00000051317; OTTMUST00000051318; OTTMUST00000051319; OTTMUST00000051320; OTTMUST00000051321; OTTMUST00000051322; uc007cla.1; uc007ckx.1; uc007cky.1; uc007ckz.1; uc007clb.1	TC0100001124.mm.1	2164.77	2105.58	1722.16	1428.22	1951	1332.57	1652	2241.11	cyclin T2	Multiple_Complex
Rab3gap1	NM_178690; ENSMUST00000037649; ENSMUST00000131884; ENSMUST00000142662; ENSMUST00000150945; BC046297; NM_178690.4; OTTMUST00000062113; OTTMUST00000062114; OTTMUST00000062115; OTTMUST00000062116; uc007clc.2	TC0100001125.mm.1	125.366	116.162	85.0359	82.7106	152.219	131.599	150.123	205.074	RAB3 GTPase activating protein subunit 1	Multiple_Complex
R3hdm1	NM_181750; ENSMUST00000036288; BC137772; NM_181750.2; uc007clh.1; uc007cli.1; uc007clj.1; uc011wrb.1	TC0100001129.mm.1	3590.58	4011.71	2817.11	2304.12	1089.92	814.629	2435.5	3147.52	R3H domain containing 1	Multiple_Complex
Thsd7b	NM_172485; ENSMUST00000040311; ENSMUST00000073527; ENSMUST00000140629; ENSMUST00000140834; ENSMUST00000143130; ENSMUST00000148051; ENSMUST00000151700; ENSMUST00000152305; BC063250; NM_172485.3; OTTMUST00000064853; OTTMUST00000064854; OTTMUST00000064855; OTTMUST00000064856; OTTMUST00000064857; OTTMUST00000064858; OTTMUST00000064859; OTTMUST00000064860; uc007clu.2; uc007clv.2; uc007clw.1	TC0100001145.mm.1	41.0696	38.0546	40.2244	40.2244	60.5477	58.0812	68.1197	45.2548	thrombospondin, type I, domain containing 7B	Multiple_Complex
Pigr	NM_011082; ENSMUST00000027675; ENSMUST00000133792; ENSMUST00000137782; BC013556; NM_011082.3; OTTMUST00000054216; OTTMUST00000054217; OTTMUST00000054218; uc011wrk.1	TC0100001165.mm.1	19.1597	19.8353	22.6274	20.9663	23.1029	27.2843	24.9333	21.5557	polymeric immunoglobulin receptor	Multiple_Complex
Fcmr	NM_026976; ENSMUST00000038829; ENSMUST00000126821; ENSMUST00000145446; ENSMUST00000149355; BC116674; BC118505	TC0100001166.mm.1	18.2522	17.8766	23.4254	25.6342	34.2968	40.5042	30.2738	20.2521	Fc fragment of IgM receptor	Multiple_Complex
Eif2d	NM_001136070; NM_010709; ENSMUST00000068791; ENSMUST00000068805; ENSMUST00000112446; ENSMUST00000131855; ENSMUST00000139468; ENSMUST00000149119; ENSMUST00000151874; ENSMUST00000153651; BC025036; NM_001136070.1; NM_010709.3; OTTMUST00000051117; OTTMUST00000051118; OTTMUST00000051119; OTTMUST00000051120; OTTMUST00000051121; OTTMUST00000051122; OTTMUST00000051123; OTTMUST00000051124; uc007cmx.2; uc0…	TC0100001168.mm.1	613.109	544.958	572.051	621.668	326.288	349.706	75.5835	519.147	eukaryotic translation initiation factor 2D	Multiple_Complex
Ctse	NM_007799; ENSMUST00000073350; ENSMUST00000112411; ENSMUST00000141061; BC005432; NM_007799.3; OTTMUST00000054295; OTTMUST00000054296; OTTMUST00000054297; uc007cnm.1; uc007cnn.2; uc007cno.1	TC0100001172.mm.1	20.5348	20.393	24.4201	25.4572	26.3549	30.2738	28.84	20.8215	cathepsin E	Multiple_Complex
Rab7b	NM_145509; ENSMUST00000064664; ENSMUST00000064679; ENSMUST00000129905; ENSMUST00000130848; ENSMUST00000136247	TC0100001173.mm.1	25.9921	28.443	27.0958	26.7228	35.5062	39.9466	36.2523	30.2738	RAB7B, member RAS oncogene family	Multiple_Complex
Slc26a9	NM_177243; ENSMUST00000049027; ENSMUST00000130544; ENSMUST00000147800; BC160193; NM_177243.4; OTTMUST00000051188; OTTMUST00000051189; OTTMUST00000051190; uc007cns.1	TC0100001174.mm.1	362.039	319.573	247.28	250.732	709.176	537.455	232.325	1105.13	solute carrier family 26, member 9; Synthetic construct Mus musculus clone IMAGE:100063841, MGC:193308 solute carrier family 26, member 9 (Slc26a9) mRNA, encodes complete protein.	Multiple_Complex
Pm20d1	NM_178079; ENSMUST00000048660; ENSMUST00000112393; ENSMUST00000132450; ENSMUST00000152989; BC120725; BC125395; NM_178079.3; OTTMUST00000051086; OTTMUST00000051087; OTTMUST00000051088; OTTMUST00000051089; uc007cnt.2	TC0100001175.mm.1	17.6305	18.507	20.2521	21.4068	23.1029	24.4201	24.4201	18.7654	peptidase M20 domain containing 1	Multiple_Complex
Slc41a1	NM_173865; ENSMUST00000086559; ENSMUST00000132585; ENSMUST00000146360; BC096596; BC116280; BC116281; NM_173865.3; OTTMUST00000051727; OTTMUST00000051728; OTTMUST00000051729; uc007cnu.3	TC0100001176.mm.1	704.277	792.353	552.565	491.143	803.414	572.051	596.344	1858.6	solute carrier family 41, member 1	Multiple_Complex
Nucks1	NM_001145804; NM_175294; ENSMUST00000062264; BC039951; NM_001145804.1; NM_175294.3; uc007cnx.2; uc007cny.2	TC0100001178.mm.1	5077.84	5077.84	3956.48	3213.66	1045.52	455.087	2797.65	4608.24	nuclear casein kinase and cyclin-dependent kinase substrate 1	Multiple_Complex
Elk4	NM_007923; ENSMUST00000027696; ENSMUST00000086556; ENSMUST00000124579; ENSMUST00000131159; ENSMUST00000146188; ENSMUST00000146432; ENSMUST00000147218; BC144844; BC145795; NM_007923.2; OTTMUST00000061502; OTTMUST00000061503; OTTMUST00000061504; OTTMUST00000061505; OTTMUST00000061506; OTTMUST00000061507; OTTMUST00000061508; uc007cob.1; uc007coc.1; uc007cod.1	TC0100001181.mm.1	413.001	374.806	294.067	240.518	436.549	250.732	491.143	694.581	ELK4, member of ETS oncogene family	Multiple_Complex
Lemd1	NM_001033250; ENSMUST00000112357; BC115462; BC115463; NM_001033250.4; uc007coi.2; uc007coj.2; uc007cok.2; uc007col.1; uc007com.2	TC0100001186.mm.1	34.2968	38.3193	37.5307	41.6429	32.2226	43.7133	36.2523	37.7918	LEM domain containing 1	Multiple_Complex
Nuak2	NM_001195025; NM_028778; ENSMUST00000072177; ENSMUST00000082125; ENSMUST00000128661; ENSMUST00000133246; BC033302; BC046833; NM_001195025.1; NM_028778.4; OTTMUST00000052118; OTTMUST00000052119; OTTMUST00000052120; OTTMUST00000052121; uc007coo.2; uc007cop.2	TC0100001190.mm.1	28.0514	29.0406	29.0406	32	50.5626	49.8665	49.18	33.3589	NUAK family, SNF1-like kinase, 2	Multiple_Complex
Dstyk	NM_172516; ENSMUST00000045110; BC130226; NM_172516.4; uc007cou.1; uc007cov.1; uc011wrw.1	TC0100001193.mm.1	803.414	837.532	754.826	600.491	1184.45	739.292	879.171	1009.9	dual serine/threonine and tyrosine protein kinase	Multiple_Complex
Lrrn2	NM_010732; ENSMUST00000027706; ENSMUST00000159088; BC056458; NM_010732.4; OTTMUST00000072558; OTTMUST00000072559; uc007cpi.2	TC0100001200.mm.1	26.5382	29.8571	29.0406	32.6724	42.5179	49.5221	41.0696	26.9087	leucine rich repeat protein 2, neuronal	Multiple_Complex
Pik3c2b	NM_001099276; ENSMUST00000077730; ENSMUST00000124934; ENSMUST00000145153; ENSMUST00000153707; BC132141; NM_001099276.2; OTTMUST00000052037; OTTMUST00000052038; OTTMUST00000052039; OTTMUST00000052040; uc007cpq.1; uc007cpr.1; uc011wry.1	TC0100001201.mm.1	1052.79	989.119	982.286	916.506	1924.14	1217.75	1074.91	1002.93	phosphoinositide-3-kinase, class 2, beta polypeptide	Multiple_Complex
Ppp1r15b	NM_133819; ENSMUST00000052529; ENSMUST00000122956; BC156913; NM_133819.3; OTTMUST00000052463; OTTMUST00000052464; uc007cps.2; uc007cpt.2	TC0100001202.mm.1	5148.73	4359.66	4640.29	4705.07	2005.85	1530.73	4182.07	3125.78	protein phosphatase 1, regulatory (inhibitor) subunit 15b; Synthetic construct Mus musculus clone IMAGE:100062782, MGC:190960 protein phosphatase 1, regulatory (inhibitor) subunit 15b (Ppp1r15b) mRNA, encodes complete protein.	Multiple_Complex
Plekha6	NM_001160268; NM_182930; ENSMUST00000038295; ENSMUST00000105082; BC054547; NM_001160268.1; NM_182930.2; uc007cpu.2; uc007cpv.2; uc007cpx.2	TC0100001204.mm.1	139.102	136.239	174.853	168.897	398.932	302.334	95.6704	118.603	pleckstrin homology domain containing, family A member 6	Multiple_Complex
Etnk2	NM_175443; ENSMUST00000129213; ENSMUST00000131450; ENSMUST00000135222; ENSMUST00000147909; ENSMUST00000156832; BC145351; BC152310; NM_175443.5; OTTMUST00000066289; OTTMUST00000066290; OTTMUST00000066291; OTTMUST00000066292; OTTMUST00000066293; uc007cqg.2; uc007cqh.3; uc007cqi.3; uc011wsa.2	TC0100001207.mm.1	24.2515	30.6965	25.2813	26.7228	28.6408	37.7918	31.5594	29.2426	ethanolamine kinase 2	Multiple_Complex
Chil1	NM_007695; ENSMUST00000082060; ENSMUST00000132873; ENSMUST00000133701; ENSMUST00000134812; ENSMUST00000139254; ENSMUST00000144819; ENSMUST00000153856; ENSMUST00000156873; BC003780; BC004734; BC005611; OTTMUST00000074544; OTTMUST00000074545; OTTMUST00000074546; OTTMUST00000074547; OTTMUST00000074548; OTTMUST00000074549; OTTMUST00000077094; uc007crg.2	TC0100001222.mm.1	18.507	17.2677	22.0087	22.1618	32.2226	43.1115	34.7755	22.3159	chitinase-like 1	Multiple_Complex
Cyb5r1	NM_028057; ENSMUST00000027726; ENSMUST00000127412; ENSMUST00000130836; ENSMUST00000133686; ENSMUST00000154237; ENSMUST00000172496; ENSMUST00000172795; ENSMUST00000173908; ENSMUST00000174315; BC016266; BC024618; NM_028057.2; OTTMUST00000057943; OTTMUST00000057944; OTTMUST00000057945; OTTMUST00000057946; OTTMUST00000061671; OTTMUST00000097210; OTTMUST00000097211; OTTMUST00000097212; OTTMUST00000097…	TC0100001227.mm.1	25.8125	26.9087	26.9087	29.8571	35.261	33.1285	29.446	26.7228	cytochrome b5 reductase 1	Multiple_Complex
Adipor1	NM_028320; ENSMUST00000027727; ENSMUST00000112237; ENSMUST00000148822; ENSMUST00000156433; BC014875; NM_028320.3; OTTMUST00000051762; OTTMUST00000051763; OTTMUST00000051764; OTTMUST00000051765; uc007crx.1; uc007cry.1	TC0100001228.mm.1	296.112	292.036	278.204	227.544	115.36	140.07	103.968	202.251	adiponectin receptor 1	Multiple_Complex
Klhl12	NM_153128; ENSMUST00000027725; ENSMUST00000112232; ENSMUST00000116528; ENSMUST00000133721; ENSMUST00000141458; BC034514; NM_153128.2; OTTMUST00000050879; OTTMUST00000050880; OTTMUST00000050881; OTTMUST00000050882; uc007crz.1; uc007csa.1; uc007csb.1	TC0100001230.mm.1	433.534	396.177	380.038	326.288	176.069	191.341	362.039	442.643	kelch-like 12	Multiple_Complex
Gm15454	XM_003085327.2	TC0100001233.mm.1	580.037	537.455	537.455	694.581	192.672	257.781	337.794	268.727	predicted gene 15454	Multiple_Complex
Kdm5b	NM_152895; ENSMUST00000047714; ENSMUST00000112197; ENSMUST00000112198; ENSMUST00000133725; BC048180; BC057318; NM_152895.2; OTTMUST00000041390; OTTMUST00000041391; OTTMUST00000041392; OTTMUST00000041393; uc007csf.2; uc007csg.2; uc011wsg.1	TC0100001234.mm.1	12161.2	11747	10734.7	9026.81	989.119	955.426	2048	4420.52	lysine (K)-specific demethylase 5B	Multiple_Complex
Ube2t	NM_001278115; NM_026024; ENSMUST00000027687; ENSMUST00000139617; BC029213; NM_026024.2; OTTMUST00000050817; OTTMUST00000050825; uc007csp.1	TC0100001240.mm.1	1458.23	1217.75	1243.34	1478.58	1251.98	1269.46	792.353	1002.93	ubiquitin-conjugating enzyme E2T (putative)	Multiple_Complex
Arl8a	NM_026823; ENSMUST00000027684; ENSMUST00000123344; ENSMUST00000125774; ENSMUST00000141177; BC018479; NM_026823.2; OTTMUST00000052114; OTTMUST00000052115; OTTMUST00000052116; OTTMUST00000052117; uc007csu.1	TC0100001245.mm.1	196.72	171.255	200.854	265.028	484.382	809.002	210.839	324.034	ADP-ribosylation factor-like 8A	Multiple_Complex
Phlda3	NM_013750; ENSMUST00000038945; ENSMUST00000136445; BC023408; NM_013750.2; OTTMUST00000052474; OTTMUST00000052475; uc007ctq.2	TC0100001254.mm.1	23.7524	23.9176	22.4711	24.59	23.7524	22.7848	24.4201	26.3549	pleckstrin homology-like domain, family A, member 3	Multiple_Complex
Tnni1	NM_001112702; NM_021467; ENSMUST00000129217; ENSMUST00000137331; ENSMUST00000139986; ENSMUST00000148201; ENSMUST00000152075; ENSMUST00000152208; ENSMUST00000154463; BC023170; NM_001112702.1; NM_021467.5; OTTMUST00000082800; OTTMUST00000082801; OTTMUST00000082802; OTTMUST00000082803; OTTMUST00000082805; OTTMUST00000082806; OTTMUST00000082807; uc011wsm.1; uc011wsn.1	TC0100003869.mm.1	21.8566	23.4254	26.3549	25.6342	31.779	37.014	33.5909	21.7057	troponin I, skeletal, slow 1	Multiple_Complex
Tmem9	NM_001160145; NM_001160146; NM_025439; ENSMUST00000063719; ENSMUST00000117950; ENSMUST00000118832; ENSMUST00000140545; ENSMUST00000165125; BC016524; NM_001160145.1; NM_001160146.1; NM_025439.3; OTTMUST00000073582; OTTMUST00000073584; OTTMUST00000073585; uc007cue.2; uc011wsv.1; uc011wsw.1; uc011wsx.1	TC0100001258.mm.1	102.537	111.43	95.0095	91.1392	109.137	115.36	110.661	151.167	transmembrane protein 9	Multiple_Complex
Ascl5	NM_001270609; ENSMUST00000180436; OTTMUST00000112803	TC0100001259.mm.1	26.5382	27.4741	29.0406	32	30.2738	35.0174	38.0546	24.761	achaete-scute complex homolog 5 (Drosophila)	Multiple_Complex
Cacna1s	NM_001081023; NM_014193; ENSMUST00000112064; ENSMUST00000112068; ENSMUST00000159106; ENSMUST00000160641; ENSMUST00000161700; ENSMUST00000161865; BC172641; NM_001081023.1; NM_014193.2; OTTMUST00000085065; OTTMUST00000085066; OTTMUST00000085067; OTTMUST00000085068; OTTMUST00000085069; uc007cuf.1; uc007cug.1	TC0100001260.mm.1	24.2515	24.2515	27.8576	28.84	34.0598	40.7859	34.0598	27.8576	calcium channel, voltage-dependent, L type, alpha 1S subunit; Synthetic construct Mus musculus clone IMAGE:100069449, MGC:199351 calcium channel, voltage-dependent, L type, alpha 1S subunit (Cacna1s) mRNA, encodes complete protein.	Multiple_Complex
Kif21b	NM_001039472; ENSMUST00000075164; ENSMUST00000122892; ENSMUST00000127624; ENSMUST00000130864; ENSMUST00000165333; ENSMUST00000171381; NM_001039472.1; OTTMUST00000066456; OTTMUST00000066457; OTTMUST00000066458; OTTMUST00000066459; OTTMUST00000094308; OTTMUST00000094309; uc007cul.1; uc007cum.1	TC0100001262.mm.1	68.1197	70.0348	60.5477	55.3304	98.36	92.4115	47.1766	55.7152	kinesin family member 21B	Multiple_Complex
Ddx59	NM_026500; ENSMUST00000027655; ENSMUST00000122959; ENSMUST00000129218; ENSMUST00000149783; BC023840; NM_026500.3; OTTMUST00000051238; OTTMUST00000051239; OTTMUST00000051240; OTTMUST00000051241; uc007cut.1; uc007cuu.2	TC0100001268.mm.1	167.73	158.683	129.787	144.007	176.069	129.787	221.322	288.015	DEAD (Asp-Glu-Ala-Asp) box polypeptide 59	Multiple_Complex
A130050O07Rik	ENSMUST00000054333; XR_106099.1	TC0100001285.mm.1	14.0257	14.1232	16.9123	17.1484	24.59	24.0839	27.8576	16.3362	RIKEN cDNA A130050O07 gene	Multiple_Complex
Mir181a-1; Mir181b-1	NR_029795; NR_029820; NR_029795.1; NR_029820.1; uc007cve.2	TC0100001288.mm.1	15.3482	15.3482	19.4271	20.1122	18.1261	25.8125	22.7848	17.0299	microRNA 181a-1; microRNA 181b-1	Multiple_Complex
Dennd1b	NM_001166501; NM_181347; ENSMUST00000070283; ENSMUST00000094505; ENSMUST00000133941; ENSMUST00000137127; ENSMUST00000138872; ENSMUST00000145931; ENSMUST00000146369; ENSMUST00000168527; BC141388; BC141389; NM_001166501.1; NM_181347.3; OTTMUST00000083856; OTTMUST00000083857; OTTMUST00000083858; OTTMUST00000083859; OTTMUST00000083860; OTTMUST00000083867; OTTMUST00000085752; uc007cvy.2; uc007cvz.2; u…	TC0100001294.mm.1	57.2816	64.4452	66.7178	65.3448	91.1392	77.7085	57.68	56.493	DENN/MADD domain containing 1B	Multiple_Complex
Zbtb41	NM_172643; ENSMUST00000039867; BC150859; NM_172643.5; OTTMUST00000051928; uc007cwg.2; uc011wtd.1	TC0100001302.mm.1	1758.34	1858.6	1686.71	1468.37	968.763	675.588	891.444	1136.2	zinc finger and BTB domain containing 41 homolog	Multiple_Complex
Aspm	NM_009791; ENSMUST00000053364; ENSMUST00000097554; ENSMUST00000128413; ENSMUST00000155402; NM_009791.4; OTTMUST00000046913; OTTMUST00000046914; OTTMUST00000046915; OTTMUST00000046916; uc007cwh.1; uc007cwi.1; uc007cwj.1	TC0100001303.mm.1	675.588	680.287	530.056	421.679	215.269	229.126	421.679	372.217	asp (abnormal spindle)-like, microcephaly associated (Drosophila)	Multiple_Complex
F13b	NM_031164; ENSMUST00000027615; ENSMUST00000139080; ENSMUST00000141842; BC030166; NM_031164.2; OTTMUST00000050890; OTTMUST00000050891; OTTMUST00000050892; uc007cwk.2	TC0100001304.mm.1	18.0009	18.2522	18.7654	18.6357	25.6342	25.2813	30.4844	26.3549	coagulation factor XIII, beta subunit; coagulation factor XIII beta subunit	Multiple_Complex
Kcnt2	NM_001081027; ENSMUST00000060201; ENSMUST00000119786; ENSMUST00000120709; ENSMUST00000120796; ENSMUST00000145077; ENSMUST00000154966; NM_001081027.2; OTTMUST00000074033; OTTMUST00000074182; OTTMUST00000074238; OTTMUST00000074239; OTTMUST00000074240; OTTMUST00000074307; uc007cww.1; uc011wth.1	TC0100001308.mm.1	16.3362	17.8766	19.9733	18.3792	24.9333	28.6408	24.761	19.0273	potassium channel, subfamily T, member 2	Multiple_Complex
B3galt2	NM_020025; ENSMUST00000038252; BC046322; NM_020025.4; OTTMUST00000076604; uc007cwy.2	TC0100001313.mm.1	19.9733	22.4711	21.4068	24.2515	21.8566	24.9333	27.0958	22.9433	UDP-Gal:betaGlcNAc beta 1,3-galactosyltransferase, polypeptide 2	Multiple_Complex
Glrx2	NM_001038592; NM_001038593; NM_001038594; NM_023505; ENSMUST00000050491; ENSMUST00000111957; ENSMUST00000126514; ENSMUST00000129653; ENSMUST00000145571; ENSMUST00000145969; ENSMUST00000148600; ENSMUST00000149103; ENSMUST00000152435; BC132031; BC132033; BC145304; NM_001038592.1; NM_001038593.1; NM_001038594.1; NM_023505.2; OTTMUST00000049271; OTTMUST00000049272; OTTMUST00000049273; OTTMUST00000049…	TC0100001316.mm.1	184.823	178.527	159.786	164.279	113.772	99.7331	181.019	167.73	glutaredoxin 2 (thioltransferase)	Multiple_Complex
Gm25663	ENSMUST00000157698	TC0100001318.mm.1	23.1029	15.0324	18.507	15.2422	14.3204	14.1232	26.7228	21.1121	predicted gene, 25663 [Source:MGI Symbol;Acc:MGI:5455440]	Multiple_Complex
Brinp3	NM_001145807; NM_153539; ENSMUST00000074622; ENSMUST00000125331; ENSMUST00000128345; ENSMUST00000132847; ENSMUST00000166814; BC030498; BC099956; NM_001145807.1; NM_153539.3; OTTMUST00000058815; OTTMUST00000058816; OTTMUST00000058817; OTTMUST00000058818; uc007cxo.2; uc007cxp.2; uc007cxq.2; uc007cxr.1	TC0100001330.mm.1	26.3549	26.5382	24.0839	26.9087	32.6724	34.0598	31.125	29.2426	bone morphogenetic protein/retinoic acid inducible neural specific 3	Multiple_Complex
Tpr	NM_133780; ENSMUST00000119161; ENSMUST00000124484; ENSMUST00000124973; ENSMUST00000128417; ENSMUST00000130779; ENSMUST00000131701; ENSMUST00000132257; ENSMUST00000132522; ENSMUST00000138718; ENSMUST00000141827; ENSMUST00000147769; ENSMUST00000150752; ENSMUST00000151563; ENSMUST00000152967; BC141406; BC141410; NM_133780.3; OTTMUST00000073088; OTTMUST00000073201; OTTMUST00000073202; OTTMUST00000073…	TC0100001341.mm.1	9475.59	9877.98	9152.82	7858.29	1924.14	1305.15	4904.87	4482.23	translocated promoter region, nuclear basket protein; translocated promoter region	Multiple_Complex
Fam129a	NM_022018; ENSMUST00000086267; ENSMUST00000097541; ENSMUST00000111875; ENSMUST00000134499; ENSMUST00000148810; BC058234; BC137843; NM_022018.3; OTTMUST00000050970; OTTMUST00000050971; OTTMUST00000050972; OTTMUST00000050973; OTTMUST00000050974; uc007cyz.2; uc007cza.2; uc011wtn.1; uc011wto.1	TC0100001356.mm.1	56.1028	68.1197	55.7152	52.3457	58.892	55.7152	42.2243	56.1028	family with sequence similarity 129, member A	Multiple_Complex
Edem3	NM_001039644; ENSMUST00000059498; BC138658; BC138659; BC145357; BC145358; NM_001039644.2; uc007czb.1; uc007czc.2; uc011wtp.1; uc011wtq.1	TC0100001358.mm.1	568.1	592.224	572.051	481.036	116.162	98.36	65.3448	335.461	ER degradation enhancer, mannosidase alpha-like 3	Multiple_Complex
Arpc5	NM_026369; ENSMUST00000077755; ENSMUST00000097536; ENSMUST00000143008; BC060143; NM_026369.2; OTTMUST00000052610; OTTMUST00000052611; OTTMUST00000052612; uc007czj.2; uc007czk.2	TC0100001369.mm.1	675.588	729.114	694.581	803.414	352.139	259.574	1360.57	648.067	actin related protein 2/3 complex, subunit 5	Multiple_Complex
Ncf2	NM_010877; ENSMUST00000027754; BC003730; NM_010877.4; uc007czm.1	TC0100001370.mm.1	40.7859	41.3553	41.3553	40.2244	40.7859	45.5696	43.4113	43.1115	neutrophil cytosolic factor 2	Multiple_Complex
Nmnat2	NM_175460; ENSMUST00000043313; BC089007; NM_175460.3; uc007czq.1; uc011wts.1	TC0100001373.mm.1	80.4489	83.8652	92.4115	99.0442	159.786	123.64	96.3358	101.829	nicotinamide nucleotide adenylyltransferase 2	Multiple_Complex
Shcbp1l	NM_001033162; ENSMUST00000042373; ENSMUST00000136614; ENSMUST00000137861; BC113157; NM_001033162.2; OTTMUST00000055224; OTTMUST00000055225; OTTMUST00000055226; uc007czx.1	TC0100001377.mm.1	49.18	51.9842	48.8403	41.6429	54.1917	52.7098	58.892	88.0347	Shc SH2-domain binding protein 1-like	Multiple_Complex
Rgs8	NM_026380; ENSMUST00000041776; ENSMUST00000111810; ENSMUST00000111812; ENSMUST00000111814; ENSMUST00000111815; ENSMUST00000124500; ENSMUST00000147482; ENSMUST00000147700; ENSMUST00000147794; ENSMUST00000152114; BC065056; BC094577; NM_026380.3; OTTMUST00000051304; OTTMUST00000051305; OTTMUST00000051306; OTTMUST00000051307; OTTMUST00000051308; OTTMUST00000051309; OTTMUST00000051310; OTTMUST00000051…	TC0100001379.mm.1	33.8246	33.5909	34.5353	36.2523	41.6429	42.2243	39.9466	37.014	regulator of G-protein signaling 8	Multiple_Complex
Rnasel	NM_011882; ENSMUST00000086209; ENSMUST00000182016; ENSMUST00000182131; ENSMUST00000182538; ENSMUST00000182722; ENSMUST00000183138; ENSMUST00000183241; BC138013; NM_011882.2; OTTMUST00000114392; OTTMUST00000114394; OTTMUST00000114395; OTTMUST00000114396; OTTMUST00000114397; OTTMUST00000114398; uc007daf.1; uc007dag.2; uc007dah.1; uc007daj.2; uc011wtu.1	TC0100001382.mm.1	26.9087	31.125	29.2426	28.2465	32.8996	34.2968	36.5044	30.4844	ribonuclease L (2, 5-oligoisoadenylate synthetase-dependent); ribonuclease L (2', 5'-oligoisoadenylate synthetase-dependent)	Multiple_Complex
Glul; Mir8114	NM_008131; NR_106194; ENSMUST00000086199; ENSMUST00000139476; ENSMUST00000140685; ENSMUST00000153134; ENSMUST00000154576; BC015086; NM_008131.3; OTTMUST00000039662; OTTMUST00000039663; OTTMUST00000039664; OTTMUST00000039665; OTTMUST00000050906; uc007daq.1	TC0100001387.mm.1	3373.43	3125.78	3420.52	3147.52	1562.89	1351.18	1341.84	1770.57	glutamate-ammonia ligase (glutamine synthetase); microRNA 8114	Multiple_Complex
Stx6	NM_021433; ENSMUST00000027743; BC029205; NM_021433.3; uc007dbb.1; uc007dbc.1; uc007dbd.1	TC0100001397.mm.1	173.645	187.403	131.599	135.298	242.191	165.421	128	207.937	syntaxin 6	Multiple_Complex
Acbd6	NM_001145781; NM_026683; NM_028250; ENSMUST00000035560; ENSMUST00000080138; ENSMUST00000097529; ENSMUST00000159339; BC115580; BC115581; NM_001145781.1; NM_026683.1; NM_028250.3; OTTMUST00000088454; OTTMUST00000088455; OTTMUST00000088456; OTTMUST00000088457; uc007dbk.2; uc007dbl.2; uc011wtw.1	TC0100001402.mm.1	501.463	552.565	552.565	564.175	617.374	916.506	252.476	744.434	acyl-Coenzyme A binding domain containing 6	Multiple_Complex
Tor1aip2	NM_001160180; NM_001160181; NM_001160182; NM_022329; NM_172843; ENSMUST00000060404; ENSMUST00000065648; ENSMUST00000097526; ENSMUST00000111754; ENSMUST00000111757; ENSMUST00000125371; ENSMUST00000128941; ENSMUST00000131359; ENSMUST00000133152; BC064017; BC066790; BC092059; NM_001160180.1; NM_001160181.1; NM_001160182.1; NM_022329.4; NM_172843.4; OTTMUST00000052163; OTTMUST00000052164; OTTMUST0000…	TC0100001409.mm.1	77.1717	73.0089	80.4489	95.6704	67.1819	79.8932	85.0359	65.3448	torsin A interacting protein 2	Multiple_Complex
Gm10031	ENSMUST00000178028	TC0100001418.mm.1	23170.5	19484	14766.1	12590.1	16384	16046.8	41189.8	36611.3	predicted pseudogene 10031	Multiple_Complex
Abl2	NM_001136104; NM_009595; ENSMUST00000027888; ENSMUST00000166172; ENSMUST00000173929; BC137771; BC144897; BC157086; NM_001136104.1; NM_009595.3; OTTMUST00000095554; OTTMUST00000095555; OTTMUST00000095556; uc007dcl.2; uc011wuf.1; uc011wug.1	TC0100001419.mm.1	5404.7	5442.3	5220.6	4770.75	9809.75	5752.61	5712.87	5256.91	v-abl Abelson murine leukemia viral oncogene 2 (arg, Abelson-related gene); Synthetic construct Mus musculus clone IMAGE:100063361, MGC:191069 v-abl Abelson murine leukemia viral oncogene homolog 2 (arg, Abelson-related gene) (Abl2) mRNA, encodes complete protein.	Multiple_Complex
Gm15428	ENSMUST00000121352	TC0100001424.mm.1	40.2244	47.5048	48.1679	42.5179	28.6408	44.0173	254.232	58.892	predicted pseudogene 15428 [Source:MGI Symbol;Acc:MGI:3642670]	Multiple_Complex
2810025M15Rik	NR_027984; BC055845; BC055878; NR_027984.1; uc007ddi.1	TC0100001431.mm.1	1184.45	1192.69	982.286	897.644	689.784	436.549	982.286	1595.73	RIKEN cDNA 2810025M15 gene	Multiple_Complex
Sec16b	NM_001159986; NM_033354; NR_027641; ENSMUST00000027881; ENSMUST00000086130; ENSMUST00000111700; ENSMUST00000146873; ENSMUST00000155665; BC059194; NM_001159986.1; NM_033354.3; NR_027641.1; OTTMUST00000054129; OTTMUST00000054130; OTTMUST00000054131; OTTMUST00000054132; OTTMUST00000054133; uc007ddl.2; uc007ddm.2; uc007ddn.2; uc007ddo.1	TC0100001434.mm.1	62.6829	62.2499	58.892	62.6829	143.013	122.786	45.5696	66.257	SEC16 homolog B (S. cerevisiae)	Multiple_Complex
Rfwd2	NM_011931; ENSMUST00000076894; BC082804; BC158002; NM_011931.3; uc007ddz.1	TC0100001442.mm.1	5996.9	5955.47	5042.77	4544.8	5293.48	3304	7131.55	6338.83	ring finger and WD repeat domain 2	Multiple_Complex
Scarna3a; Mir1843b	NR_028518; NR_039543; NR_028518.1; uc011wul.1	TC0100001446.mm.1	81.0084	75.5835	87.4266	103.968	179.769	129.787	218.275	69.0706	small Cajal body-specific RNA 3A; microRNA 1843b	Multiple_Complex
4930523C07Rik	NM_001162896; NR_028111; ENSMUST00000060298; ENSMUST00000097513; ENSMUST00000163892; ENSMUST00000165923; ENSMUST00000168250; ENSMUST00000168359; NM_001162896.1; NR_028111.1; uc007deb.2; uc007dec.2	TC0100001451.mm.1	18.6357	16.6795	19.4271	19.1597	22.1618	26.3549	27.0958	21.5557	RIKEN cDNA 4930523C07 gene	Multiple_Complex
Rc3h1	NM_001024952; ENSMUST00000035911; ENSMUST00000161609; ENSMUST00000161708; BC138663; NM_001024952.2; OTTMUST00000088460; OTTMUST00000088461; OTTMUST00000088462; uc007del.2	TC0100001459.mm.1	5712.87	5873.48	4389.98	3821.7	5556.65	3590.58	10513.8	6038.61	RING CCCH (C3H) domains 1	Multiple_Complex
Serpinc1	NM_080844; ENSMUST00000064725; BC019447; BC033377; NM_080844.4; uc007dem.2	TC0100001462.mm.1	54.5686	58.4852	56.8859	63.1189	73.5167	69.551	83.2859	62.2499	serine (or cysteine) peptidase inhibitor, clade C (antithrombin), member 1	Multiple_Complex
Gas5; Snord47	NR_002840; NR_028543; NR_002840.2; NR_028543.1; OTTMUST00000089181; OTTMUST00000089182; OTTMUST00000089183; OTTMUST00000089184; OTTMUST00000089185; OTTMUST00000089186; OTTMUST00000089187; OTTMUST00000089188; OTTMUST00000089189; OTTMUST00000089190; OTTMUST00000089191; OTTMUST00000089192; OTTMUST00000089193; OTTMUST00000089194; OTTMUST00000089195; OTTMUST00000089196; OTTMUST00000089197; OTTMUST0000…	TC0100001464.mm.1	481.036	477.713	418.766	433.534	203.657	210.839	404.501	430.539	growth arrest specific 5; small nucleolar RNA, C/D box 47	Multiple_Complex
Cenpl	NM_001159930; NM_027429; ENSMUST00000028035; ENSMUST00000111618; ENSMUST00000111620; ENSMUST00000143486; ENSMUST00000155808; BC116944; BC116970; NM_001159930.1; NM_027429.3; OTTMUST00000052614; OTTMUST00000052615; OTTMUST00000052616; OTTMUST00000052617; OTTMUST00000052618	TC0100001465.mm.1	176.069	150.123	124.5	108.383	70.0348	61.3929	87.4266	121.095	centromere protein L; centromere protein L (Cenpl), transcript variant 2, mRNA.	Multiple_Complex
Ankrd45	NM_028664; ENSMUST00000052245; ENSMUST00000111608; ENSMUST00000125018; ENSMUST00000150721; BC049713; NM_028664.1; OTTMUST00000052534; OTTMUST00000052535; OTTMUST00000052536; uc007dfj.2	TC0100001466.mm.1	33.1285	34.2968	35.5062	35.5062	34.2968	31.779	31.779	32	ankyrin repeat domain 45	Multiple_Complex
Pigc	NM_001039045; NM_026078; ENSMUST00000028021; ENSMUST00000111594; ENSMUST00000159648; ENSMUST00000160881; BC006938; NM_001039045.1; NM_026078.2; OTTMUST00000072955; OTTMUST00000072956; OTTMUST00000073019; OTTMUST00000073020; OTTMUST00000073021; uc007dfx.1; uc007dfy.1	TC0100001473.mm.1	34.7755	36.0019	34.7755	31.779	41.0696	42.2243	43.7133	39.3966	phosphatidylinositol glycan anchor biosynthesis, class C	Multiple_Complex
Dnm3os; Mir214; Mir199a-2	NR_002870; NR_029796; NR_029810; NR_002870.2; NR_029796.1; NR_029810.1; OTTMUST00000073023; uc007dgf.1	TC0100001475.mm.1	17.3878	16.3362	17.5087	18.1261	21.5557	22.0087	24.0839	21.4068	dynamin 3, opposite strand; microRNA 214; microRNA 199a-2	Multiple_Complex
Gm16101	ENSMUST00000160695	TC0100001476.mm.1	13.6422	12.1257	13.2691	13.1775	14.42	17.8766	18.7654	14.6213	predicted gene 16101 [Source:MGI Symbol;Acc:MGI:3801814]	Multiple_Complex
Vamp4	NM_016796; ENSMUST00000050010; ENSMUST00000128704; ENSMUST00000132158; ENSMUST00000135241; ENSMUST00000138499; ENSMUST00000150040; ENSMUST00000155003; BC138753; BC138754; NM_016796.3; OTTMUST00000082750; OTTMUST00000082751; OTTMUST00000082752; OTTMUST00000082753; OTTMUST00000082754; OTTMUST00000082755; OTTMUST00000082756; uc007dgk.1; uc007dgl.1	TC0100001479.mm.1	148.056	150.123	151.167	129.787	207.937	179.769	138.141	191.341	vesicle-associated membrane protein 4	Multiple_Complex
Gm2343	ENSMUST00000161177	TC0100001490.mm.1	10.9283	11.3137	15.2422	13.737	13.9288	17.0299	15.6707	16.1113	predicted gene 2343 [Source:MGI Symbol;Acc:MGI:3780513]	Multiple_Complex
Scyl3	NM_001286002; NM_001286003; NM_028776; ENSMUST00000027876; ENSMUST00000159516; ENSMUST00000161908; ENSMUST00000162234; ENSMUST00000162920; ENSMUST00000163033; ENSMUST00000170359; BC043085; NM_028776.4; OTTMUST00000088468; OTTMUST00000088469; OTTMUST00000088470; OTTMUST00000088471; OTTMUST00000088472; OTTMUST00000088473; uc007dhq.1; uc007dhr.1; uc007dht.1; uc011wuu.1	TC0100001493.mm.1	73.0089	92.4115	86.2229	79.3413	67.6492	58.4852	58.892	76.6386	SCY1-like 3 (S. cerevisiae); SCY1-like 3 (S. cerevisiae) (Scyl3), mRNA.	Multiple_Complex
Selp	NM_011347; ENSMUST00000160000; ENSMUST00000161020; ENSMUST00000161152; ENSMUST00000162102; ENSMUST00000162746; BC109158; BC109159; NM_011347.2; OTTMUST00000088484; OTTMUST00000088485; OTTMUST00000088486; OTTMUST00000088487; OTTMUST00000088488; uc007dhz.2	TC0100001497.mm.1	51.2685	52.3457	48.1679	51.2685	127.116	95.0095	158.683	135.298	selectin, platelet	Multiple_Complex
Gm16588	ENSMUST00000162889	TC0100001499.mm.1	93.0542	194.012	164.279	152.219	202.251	178.527	91.1392	60.9688	predicted gene 16588 [Source:MGI Symbol;Acc:MGI:4415008]	Multiple_Complex
Slc19a2	NM_001276455; NM_054087; ENSMUST00000044021; ENSMUST00000159230; ENSMUST00000160773; ENSMUST00000169394; BC034659; NM_054087.2; OTTMUST00000078223; OTTMUST00000078291; OTTMUST00000078292; OTTMUST00000092810; uc007did.1; uc007die.1	TC0100001500.mm.1	95.0095	86.8227	75.0614	68.1197	80.4489	78.7932	93.7015	137.187	solute carrier family 19 (thiamine transporter), member 2	Multiple_Complex
Mpc2	NM_027430; ENSMUST00000027853; ENSMUST00000128633; ENSMUST00000138999; BC018324; NM_027430.2; OTTMUST00000054065; OTTMUST00000054066; OTTMUST00000054067; uc007djd.1	TC0100001520.mm.1	132.514	108.383	137.187	131.599	68.1197	54.9482	63.1189	78.249	mitochondrial pyruvate carrier 2	Multiple_Complex
Adcy10	NM_173029; ENSMUST00000027852; ENSMUST00000111439; ENSMUST00000111440; ENSMUST00000124037; ENSMUST00000148550; ENSMUST00000155216; BC138448; NM_173029.3; OTTMUST00000050855; OTTMUST00000050856; OTTMUST00000050857; OTTMUST00000050886; OTTMUST00000050887; OTTMUST00000050888; uc007dje.1; uc007djf.1; uc011wuz.1; uc011wva.1	TC0100001522.mm.1	16.7955	17.5087	18.8959	18.3792	22.7848	26.5382	23.7524	18.1261	adenylate cyclase 10	Multiple_Complex
Cd247	NM_001113391; NM_001113392; NM_001113393; NM_031162; NR_103716; ENSMUST00000005907; ENSMUST00000027849; ENSMUST00000086002; ENSMUST00000159070; ENSMUST00000161559; ENSMUST00000161971; ENSMUST00000162411; ENSMUST00000178336; BC052824; NM_001113391.2; NM_001113392.2; NM_001113393.2; NM_001113394.2; NM_031162.4; OTTMUST00000088612; OTTMUST00000088613; OTTMUST00000088614; OTTMUST00000088615; OTTMUST0…	TC0100001527.mm.1	23.9176	22.9433	24.9333	26.5382	31.779	37.5307	30.4844	25.2813	CD247 antigen	Multiple_Complex
Gpa33	NM_021610; ENSMUST00000027847; ENSMUST00000060833; ENSMUST00000166159; ENSMUST00000166860; BC008528; NM_021610.1; OTTMUST00000041022; OTTMUST00000092076; OTTMUST00000092077; uc007dkj.1	TC0100001532.mm.1	72.0037	69.0706	68.5935	68.5935	121.938	88.647	94.3532	68.1197	glycoprotein A33 (transmembrane)	Multiple_Complex
Ildr2	NM_001164528; ENSMUST00000111416; NM_001164528.1; OTTMUST00000051617; uc011wvd.1; uc011wve.1; uc011wvf.1; uc011wvg.1; uc011wvh.1; uc011wvi.1; uc011wvj.1	TC0100001533.mm.1	26.5382	27.4741	28.2465	27.2843	32.2226	38.8542	33.3589	29.446	immunoglobulin-like domain containing receptor 2	Multiple_Complex
Tada1	NM_030245; ENSMUST00000027846; ENSMUST00000132817; ENSMUST00000138148; ENSMUST00000138284; BC002307; BC027337; NM_030245.3; OTTMUST00000066478; OTTMUST00000066479; OTTMUST00000066480; OTTMUST00000066481; uc007dkl.2; uc007dkm.2	TC0100001537.mm.1	418.766	427.565	359.538	367.093	296.112	333.144	424.612	560.278	transcriptional adaptor 1	Multiple_Complex
Fam78b	NM_001160261; NM_001160262; NM_175461; ENSMUST00000122929; ENSMUST00000126198; ENSMUST00000128373; ENSMUST00000156025; ENSMUST00000165874; BC132161; BC132525; NM_001160261.1; NM_001160262.1; NM_175461.4; OTTMUST00000085670; OTTMUST00000085671; OTTMUST00000085672; OTTMUST00000085673; uc007dks.2; uc007dkt.2; uc011wvo.1	TC0100001541.mm.1	20.6776	20.1122	20.8215	20.9663	26.3549	32.6724	25.4572	21.4068	family with sequence similarity 78, member B	Multiple_Complex
Rgs5	NM_009063; ENSMUST00000027997; ENSMUST00000152809; BC037683; NM_009063.3; OTTMUST00000049406; OTTMUST00000049407; uc007dlm.1	TC0100001560.mm.1	16.7955	17.5087	19.2929	20.5348	20.1122	19.6983	20.8215	19.0273	regulator of G-protein signaling 5	Multiple_Complex
Olfml2b	NM_177068; ENSMUST00000046792; BC025654; NM_177068.4; OTTMUST00000066476; uc007dmi.2	TC0100001570.mm.1	40.7859	60.9688	35.261	30.0647	32.8996	35.5062	25.6342	43.4113	olfactomedin-like 2B	Multiple_Complex
Cfap126	NM_001081275; ENSMUST00000027959; ENSMUST00000124157; ENSMUST00000127394; ENSMUST00000129651; ENSMUST00000143623; ENSMUST00000148200; ENSMUST00000151340; ENSMUST00000156789; BC061017; OTTMUST00000051410; OTTMUST00000051411; OTTMUST00000051412; OTTMUST00000051413; OTTMUST00000051414; OTTMUST00000051415; OTTMUST00000051416; OTTMUST00000051417; uc007dna.1	TC0100001577.mm.1	64.8934	70.0348	88.647	79.8932	51.6251	65.3448	54.5686	52.3457	cilia and flagella associated protein 126	Multiple_Complex
Mpz	NM_008623; ENSMUST00000070758; ENSMUST00000111334; ENSMUST00000125565; ENSMUST00000149352; BC139139; BC141226; NM_008623.4; OTTMUST00000051092; OTTMUST00000051093; OTTMUST00000051094; OTTMUST00000051095; uc007dnc.1; uc007dnd.1	TC0100001578.mm.1	20.1122	20.6776	24.761	25.4572	32.6724	40.2244	34.0598	24.59	myelin protein zero	Multiple_Complex
Nr1i3	NM_001243062; NM_001243063; NM_009803; ENSMUST00000005820; ENSMUST00000075469; ENSMUST00000111328; ENSMUST00000133075; ENSMUST00000137298; ENSMUST00000149404; ENSMUST00000152865; ENSMUST00000155126; BC089541; NM_001243062.1; NM_001243063.1; NM_009803.5; OTTMUST00000053615; OTTMUST00000053711; OTTMUST00000053712; OTTMUST00000053713; OTTMUST00000053714; OTTMUST00000053715; OTTMUST00000053716; OTTMU…	TC0100001579.mm.1	29.2426	29.446	34.2968	35.261	33.8246	48.5029	35.261	23.9176	nuclear receptor subfamily 1, group I, member 3	Multiple_Complex
B4galt3	NM_020579; ENSMUST00000064272; ENSMUST00000111313; ENSMUST00000123954; ENSMUST00000125939; ENSMUST00000126699; ENSMUST00000129985; ENSMUST00000132890; ENSMUST00000138904; ENSMUST00000141114; ENSMUST00000141999; ENSMUST00000151863; BC013619; NM_020579.2; OTTMUST00000051448; OTTMUST00000051449; OTTMUST00000051450; OTTMUST00000051451; OTTMUST00000051452; OTTMUST00000051453; OTTMUST00000051454; OTTMU…	TC0100001582.mm.1	374.806	359.538	357.054	354.588	292.036	284.05	415.873	238.856	UDP-Gal:betaGlcNAc beta 1,4-galactosyltransferase, polypeptide 3	Multiple_Complex
Dedd	NM_001128609; NM_011615; ENSMUST00000064950; ENSMUST00000097467; ENSMUST00000111299; ENSMUST00000111300; ENSMUST00000127830; ENSMUST00000129116; ENSMUST00000131653; ENSMUST00000135150; ENSMUST00000142063; ENSMUST00000157015; BC023668; BC054445; NM_001128609.1; NM_011615.3; OTTMUST00000051499; OTTMUST00000051512; OTTMUST00000051513; OTTMUST00000051514; OTTMUST00000051515; OTTMUST00000051516; OTTMU…	TC0100001585.mm.1	592.224	560.278	491.143	526.394	843.357	704.277	666.287	584.071	death effector domain-containing	Multiple_Complex
Pfdn2	NM_011070; ENSMUST00000006579; ENSMUST00000135941; ENSMUST00000138323; BC026839; BC049606; NM_011070.3; OTTMUST00000051538; OTTMUST00000051539; OTTMUST00000051540; uc007doc.1	TC0100001586.mm.1	2856.44	3104.19	2556.58	1871.53	942.272	935.763	849.223	2817.11	prefoldin 2	Multiple_Complex
Arhgap30	NM_001005508; ENSMUST00000056449; ENSMUST00000131607; ENSMUST00000135312; BC082573; NM_001005508.2; OTTMUST00000051070; OTTMUST00000051071; OTTMUST00000051072; uc007doh.2; uc007doi.2	TC0100001590.mm.1	48.8403	46.2057	47.1766	48.1679	40.2244	44.3235	47.1766	32.6724	Rho GTPase activating protein 30	Multiple_Complex
Usf1	NM_009480; ENSMUST00000001284; ENSMUST00000159207; ENSMUST00000159371; ENSMUST00000159466; ENSMUST00000159929; ENSMUST00000160335; ENSMUST00000160486; ENSMUST00000161297; ENSMUST00000167546; BC049784; NM_009480.2; OTTMUST00000076758; OTTMUST00000076759; OTTMUST00000076760; OTTMUST00000076761; OTTMUST00000076762; OTTMUST00000076814; OTTMUST00000076815; OTTMUST00000081357	TC0100003870.mm.1	401.707	342.509	572.051	568.1	288.015	263.197	209.383	149.086	upstream transcription factor 1	Multiple_Complex
F11r	NM_172647; ENSMUST00000043839; ENSMUST00000144497; ENSMUST00000155913; BC021876; NM_172647.2; OTTMUST00000051546; OTTMUST00000051547; OTTMUST00000051548; uc007doo.1	TC0100001592.mm.1	3396.89	2683.69	2503.97	2352.53	176.069	128.89	131.599	1168.14	F11 receptor	Multiple_Complex
Itlnb	BC145376	TC0100001594.mm.1	38.0546	29.446	21.5557	22.7848	14.2215	18.507	19.8353	51.6251	intelectin b	Multiple_Complex
Cd244	NM_018729; ENSMUST00000004829; BC145067; BC160247; NM_018729.2; OTTMUST00000041041; uc007dor.1; uc007dos.1; uc029qup.1	TC0100001595.mm.1	26.5382	28.0514	23.7524	24.761	26.1729	23.9176	23.7524	36.0019	CD244 natural killer cell receptor 2B4; Synthetic construct Mus musculus clone IMAGE:100063895, MGC:193362 CD244 natural killer cell receptor 2B4 (Cd244) mRNA, encodes complete protein.	Multiple_Complex
Tma7-ps	ENSMUST00000177707; XM_001476805.2	TC0100001599.mm.1	67847.1	63303.6	70728.3	88906.4	3666.02	4329.55	18561.2	18561.2	translational machinery associated 7 homolog (S. cerevisiae), pseudogene	Multiple_Complex
Slamf1	NM_013730; ENSMUST00000015460; ENSMUST00000163992; BC117095; BC117099; NM_013730.4; OTTMUST00000091753; OTTMUST00000091754; uc007dpb.1; uc007dpc.1	TC0100001600.mm.1	181.019	181.019	138.141	143.013	317.365	304.437	530.056	424.612	signaling lymphocytic activation molecule family member 1	Multiple_Complex
Cd84	NM_001252472; NM_001289470; NM_013489; ENSMUST00000042302; ENSMUST00000128189; ENSMUST00000135386; ENSMUST00000136479; ENSMUST00000155802; BC140952; BC144736; NM_001252472.1; NM_013489.3; OTTMUST00000066580; OTTMUST00000066581; OTTMUST00000066582; OTTMUST00000066583; uc007dpf.2; uc007dpd.3; uc007dpe.2	TC0100001602.mm.1	29.0406	30.6965	30.4844	31.125	32.4467	31.3414	27.8576	34.5353	CD84 antigen	Multiple_Complex
Copa	NM_009938; ENSMUST00000027833; ENSMUST00000122845; ENSMUST00000124289; ENSMUST00000126634; ENSMUST00000133909; ENSMUST00000134468; ENSMUST00000135192; ENSMUST00000138407; ENSMUST00000142765; ENSMUST00000150298; ENSMUST00000152403; BC024070; BC047429; NM_009938.4; OTTMUST00000085713; OTTMUST00000085714; OTTMUST00000085715; OTTMUST00000085716; OTTMUST00000085717; OTTMUST00000085718; OTTMUST00000085…	TC0100001605.mm.1	694.581	699.413	770.686	739.292	675.588	714.109	458.253	393.44	coatomer protein complex subunit alpha	Multiple_Complex
Pex19	NM_001159525; NM_023041; ENSMUST00000075895; ENSMUST00000111252; ENSMUST00000127662; ENSMUST00000133081; ENSMUST00000133546; ENSMUST00000147799; BC019767; NM_001159525.1; NM_023041.3; OTTMUST00000073427; OTTMUST00000073428; OTTMUST00000073429; OTTMUST00000073430; OTTMUST00000073431; OTTMUST00000073432; uc007dpq.2; uc011wwj.1	TC0100001606.mm.1	4096	3516.68	4240.45	4211.15	1552.09	1398.83	1209.34	1541.37	peroxisomal biogenesis factor 19	Multiple_Complex
Dcaf8	NM_153555; ENSMUST00000074144; BC023704; BC023804; NM_153555.2; uc007dpr.2; uc007dps.2; uc007dpt.2; uc007dpu.2; uc007dpv.2; uc007dpw.2; uc007dpx.2	TC0100001607.mm.1	319.573	306.555	268.727	266.871	491.143	461.44	286.026	354.588	DDB1 and CUL4 associated factor 8	Multiple_Complex
Igsf8	NM_080419; ENSMUST00000039506; ENSMUST00000085912; ENSMUST00000128508; ENSMUST00000139528; ENSMUST00000150598; ENSMUST00000155363; BC048387; NM_080419.1; OTTMUST00000050841; OTTMUST00000050842; OTTMUST00000050843; OTTMUST00000050844; OTTMUST00000050845; OTTMUST00000050846; uc007dqe.1	TC0100001610.mm.1	33.5909	36.5044	35.261	35.7532	49.8665	47.5048	43.4113	41.6429	immunoglobulin superfamily, member 8	Multiple_Complex
Kcnj10	NM_001039484; ENSMUST00000056136; BC141088; NM_001039484.1; uc007dqj.1	TC0100001611.mm.1	28.443	25.8125	37.014	29.446	45.2548	53.0765	31.5594	25.1067	potassium inwardly-rectifying channel, subfamily J, member 10	Multiple_Complex
Pigm	NM_026234; ENSMUST00000052455; BC005650; BC083115; NM_026234.4; uc007dqk.2	TC0100001613.mm.1	2256.7	2091.03	2241.11	2033.85	191.341	242.191	1152.06	916.506	phosphatidylinositol glycan anchor biosynthesis, class M	Multiple_Complex
Igsf9	NM_001145800; NM_033608; ENSMUST00000052629; ENSMUST00000111235; ENSMUST00000125258; ENSMUST00000127052; ENSMUST00000127482; ENSMUST00000128638; ENSMUST00000132141; ENSMUST00000135267; ENSMUST00000140814; ENSMUST00000140816; ENSMUST00000141888; ENSMUST00000150855; ENSMUST00000155426; BC040281; NM_001145800.1; NM_033608.3; OTTMUST00000085492; OTTMUST00000085493; OTTMUST00000085494; OTTMUST00000085…	TC0100001616.mm.1	40.5042	44.6318	56.8859	51.6251	60.1295	72.0037	53.4456	39.9466	immunoglobulin superfamily, member 9	Multiple_Complex
Tagln2	NM_178598; ENSMUST00000111228; ENSMUST00000111230; ENSMUST00000138296; BC009076; BC049861; NM_178598.2; OTTMUST00000051327; OTTMUST00000051328; OTTMUST00000051329; uc007dqp.1	TC0100001617.mm.1	71.5064	73.5167	74.028	82.7106	59.3016	64.4452	78.249	103.968	transgelin 2	Multiple_Complex
Cfap45	NM_027972; ENSMUST00000085894; ENSMUST00000159395; ENSMUST00000159792; ENSMUST00000160303; ENSMUST00000160531; ENSMUST00000161140; ENSMUST00000162988; BC150929; BC151048; BC151055; OTTMUST00000087589; OTTMUST00000087590; OTTMUST00000087593; OTTMUST00000087594; OTTMUST00000087595; OTTMUST00000087596; OTTMUST00000087597; uc007dqq.2	TC0100001620.mm.1	34.7755	36.5044	32	33.3589	36.0019	39.3966	35.261	38.3193	cilia and flagella associated protein 45	Multiple_Complex
Vsig8	NM_177723; NR_027644; ENSMUST00000061835; ENSMUST00000177086; BC064106; NM_177723.4; NR_027644.1; OTTMUST00000110230; OTTMUST00000110231; uc007dqs.2; uc007dqt.2	TC0100001621.mm.1	18.7654	18.8959	19.9733	22.0087	25.8125	31.779	28.0514	18.8959	V-set and immunoglobulin domain containing 8	Multiple_Complex
Olfr1407-ps1	ENSMUST00000085885	TC0100001627.mm.1	21.1121	25.8125	25.9921	28.2465	35.7532	56.1028	40.2244	25.4572	olfactory receptor 1407, pseudogene 1 [Source:MGI Symbol;Acc:MGI:3031241]	Multiple_Complex
Olfr418	NM_146651; ENSMUST00000059754; BC119223	TC0100001630.mm.1	17.2677	17.1484	21.259	17.0299	19.9733	27.4741	20.2521	16.9123	olfactory receptor 418	Multiple_Complex
Aim2	NM_001013779; ENSMUST00000135370; ENSMUST00000147604; ENSMUST00000151176; ENSMUST00000166137; ENSMUST00000173023; ENSMUST00000174263; BC009664; NM_001013779.2; OTTMUST00000083366; OTTMUST00000084686; OTTMUST00000084687; OTTMUST00000098407; OTTMUST00000098408; uc011wws.1	TC0100001631.mm.1	25.1067	25.6342	30.0647	30.91	41.9326	39.9466	38.0546	46.5271	absent in melanoma 2	Multiple_Complex
Pydc3	NM_001162938; ENSMUST00000085876; ENSMUST00000169857; ENSMUST00000182880; NM_001162938.1; OTTMUST00000085790; OTTMUST00000114223; uc007drt.1	TC0100001634.mm.1	17.6305	18.3792	19.1597	19.0273	22.0087	23.1029	27.4741	19.1597	pyrin domain containing 3	Multiple_Complex
Olfr421-ps1	NM_146720; NR_047667; ENSMUST00000171570; ENSMUST00000179386; BC119233; NM_146720.2; OTTMUST00000111791; uc011wwy.1	TC0100001642.mm.1	10.3388	10.6295	12.295	11.9588	16	25.4572	17.8766	13.2691	olfactory receptor 421, pseudogene 1	Multiple_Complex
Spta1	NM_011465; ENSMUST00000027817; ENSMUST00000156092; BC150747; NM_011465.4; OTTMUST00000073524; OTTMUST00000073563; uc007dsw.2	TC0100001644.mm.1	16.7955	16.6795	16.5642	17.6305	20.2521	22.6274	23.5883	18.1261	spectrin alpha, erythrocytic 1	Multiple_Complex
Kmo	NM_133809; ENSMUST00000040250; ENSMUST00000097458; ENSMUST00000137174; ENSMUST00000140474; ENSMUST00000142223; ENSMUST00000150646; BC014683; NM_133809.1; OTTMUST00000062947; OTTMUST00000062948; OTTMUST00000062949; OTTMUST00000062950; OTTMUST00000062951; OTTMUST00000062952; uc007dto.1; uc007dtp.1; uc011wxc.1; uc011wxd.1	TC0100001653.mm.1	16.3362	16.5642	19.6983	17.7531	21.5557	26.7228	30.2738	18.2522	kynurenine 3-monooxygenase (kynurenine 3-hydroxylase)	Multiple_Complex
Exo1	NM_012012; ENSMUST00000039725; BC006671; NM_012012.4; uc007dtu.2	TC0100001656.mm.1	942.272	879.171	786.88	719.076	734.185	433.534	608.874	982.286	exonuclease 1	Multiple_Complex
Sdccag8	NM_029756; ENSMUST00000027785; ENSMUST00000056773; ENSMUST00000123409; ENSMUST00000133305; ENSMUST00000139589; ENSMUST00000150429; BC016244; BC025138; NM_029756.2; OTTMUST00000051035; OTTMUST00000051036; OTTMUST00000051037; OTTMUST00000051038; OTTMUST00000051039; OTTMUST00000051040; uc007duh.1; uc007dui.1; uc007duj.1; uc011wxh.1	TC0100001663.mm.1	23.7524	25.9921	23.2636	24.0839	26.7228	30.91	28.2465	27.0958	serologically defined colon cancer antigen 8; serologically defined colon cancer antigen 8 (Sdccag8), mRNA.	Multiple_Complex
Gm16432	NM_001034899; ENSMUST00000094273; BC147679; BC147686; NM_001034899.3; uc007duv.2; uc007duw.2; uc011wxj.1	TC0100001678.mm.1	54.5686	53.0765	41.9326	49.5221	54.1917	56.8859	39.6706	51.9842	predicted gene 16432	Multiple_Complex
Desi2	NM_024282; ENSMUST00000027783; ENSMUST00000159284; ENSMUST00000161075; BC002200; BC046816; NM_024282.3; OTTMUST00000073574; OTTMUST00000073575; OTTMUST00000073644; uc007dux.1; uc011wxk.1	TC0100001680.mm.1	1184.45	1160.07	1038.29	1184.45	2721.15	2134.97	1573.76	1499.22	desumoylating isopeptidase 2	Multiple_Complex
Cox20	NM_025511; ENSMUST00000027781; ENSMUST00000154437; BC055277; BC059717; NM_025511.2; OTTMUST00000052569; OTTMUST00000052570; uc007duz.1	TC0100001685.mm.1	99.7331	138.141	89.2636	72.5046	58.4852	45.2548	106.153	95.6704	COX20 Cox2 chaperone	Multiple_Complex
Gm15480	ENSMUST00000120442	TC0100001697.mm.1	72.5046	78.249	91.1392	116.162	56.8859	50.2134	64.8934	60.1295	predicted gene 15480 [Source:MGI Symbol;Acc:MGI:3705406]	Multiple_Complex
Cnst	NM_146105; ENSMUST00000040706; ENSMUST00000143270; ENSMUST00000144370; ENSMUST00000153962; BC034107; BC054802; NM_146105.3; OTTMUST00000054013; OTTMUST00000054014; OTTMUST00000054015; OTTMUST00000054016; uc007dvm.1; uc007dvn.1; uc007dvo.1	TC0100001698.mm.1	145.009	140.07	147.033	153.277	227.544	259.574	245.572	155.417	consortin, connexin sorting protein	Multiple_Complex
Sccpdh	NM_178653; ENSMUST00000040538; ENSMUST00000131039; ENSMUST00000134287; ENSMUST00000143936; ENSMUST00000144480; BC025803; NM_178653.3; OTTMUST00000052000; OTTMUST00000052001; OTTMUST00000052003; OTTMUST00000052004; OTTMUST00000052005; uc007dvp.1	TC0100001699.mm.1	59.3016	50.5626	33.1285	32.4467	39.1245	38.8542	36.5044	112.206	saccharopine dehydrogenase (putative)	Multiple_Complex
Cdc42bpa	NM_001033285; ENSMUST00000076687; ENSMUST00000097450; ENSMUST00000097453; ENSMUST00000111117; ENSMUST00000129754; ENSMUST00000132894; ENSMUST00000133890; ENSMUST00000134959; ENSMUST00000135056; ENSMUST00000139002; ENSMUST00000143161; ENSMUST00000143176; ENSMUST00000143350; ENSMUST00000145181; ENSMUST00000145274; ENSMUST00000152582; BC158017; BC158095; NM_001033285.1; OTTMUST00000051658; OTTMUST00…	TC0100001703.mm.1	116.97	116.97	103.25	86.8227	212.306	150.123	132.514	139.102	CDC42 binding protein kinase alpha	Multiple_Complex
Itpkb	NM_001081175; ENSMUST00000070181; BC151160; BC157986; BC158000; NM_001081175.1; OTTMUST00000051715; uc007dwg.1	TC0100001707.mm.1	29.6508	36.0019	32.2226	31.125	38.0546	34.0598	34.0598	28.2465	inositol 1,4,5-trisphosphate 3-kinase B	Multiple_Complex
Parp1; Mir6904	NM_007415; NR_105869; ENSMUST00000027777; BC012041; NM_007415.2; uc007dwi.1	TC0100001711.mm.1	1200.98	1089.92	1663.49	1370.04	174.853	158.683	171.255	171.255	poly (ADP-ribose) polymerase family, member 1; microRNA 6904	Multiple_Complex
Lin9	NM_001103182; NM_175186; ENSMUST00000085803; ENSMUST00000085804; NM_001103182.1; NM_175186.4; uc007dwn.1; uc007dwo.1	TC0100001712.mm.1	349.706	347.291	349.706	312.996	207.937	199.466	112.986	388.023	lin-9 homolog (C. elegans); lin-9 homolog (C. elegans) (Lin9), transcript variant 2, mRNA.	Multiple_Complex
Acbd3	NM_133225; ENSMUST00000027780; BC060602; NM_133225.3; uc007dwq.2	TC0100001713.mm.1	5184.54	4870.99	4153.18	3615.55	7082.29	5330.3	4513.4	5480.15	acyl-Coenzyme A binding domain containing 3	Multiple_Complex
Lefty2	NM_177099; ENSMUST00000085797; ENSMUST00000155546; BC066224; NM_177099.3; OTTMUST00000050909; OTTMUST00000050910; uc007dwu.1	TC0100001721.mm.1	23.4254	24.9333	27.2843	29.0406	32.4467	31.5594	28.6408	24.59	left-right determination factor 2	Multiple_Complex
Pycr2	NM_133705; ENSMUST00000027802; BC006882; NM_133705.2; uc007dwv.2	TC0100001722.mm.1	53.0765	62.2499	50.5626	54.5686	59.3016	63.1189	48.5029	49.18	pyrroline-5-carboxylate reductase family, member 2	Multiple_Complex
Lefty1	NM_010094; ENSMUST00000037361; ENSMUST00000132087; BC050221; NM_010094.3; OTTMUST00000050907; OTTMUST00000050908; uc007dww.1	TC0100001723.mm.1	19.2929	17.8766	19.2929	17.5087	24.9333	31.3414	20.9663	19.2929	left right determination factor 1	Multiple_Complex
Tmem63a	NM_144794; ENSMUST00000027800; ENSMUST00000159436; ENSMUST00000160508; ENSMUST00000160536; ENSMUST00000161523; ENSMUST00000161847; ENSMUST00000161942; ENSMUST00000162283; BC014795; BC019442; NM_144794.2; OTTMUST00000088576; OTTMUST00000088577; OTTMUST00000088578; OTTMUST00000088579; OTTMUST00000088580; OTTMUST00000088583; OTTMUST00000088584; OTTMUST00000088585; uc007dwx.1; uc007dwy.1	TC0100001724.mm.1	33.3589	33.3589	35.0174	35.0174	33.5909	35.261	33.5909	32.2226	transmembrane protein 63a	Multiple_Complex
Cnih4	NM_030131; ENSMUST00000075968; ENSMUST00000111057; ENSMUST00000111059; ENSMUST00000134115; BC065395; NM_030131.3; OTTMUST00000052605; OTTMUST00000052606; OTTMUST00000052607; OTTMUST00000052608; uc007dxe.2; uc011wxr.1	TC0100001730.mm.1	1305.15	1323.37	1184.45	1379.57	396.177	497.999	519.147	1468.37	cornichon homolog 4 (Drosophila)	Multiple_Complex
Dnah14	OTTMUST00000088638; OTTMUST00000088639; OTTMUST00000088640; XM_003688772.1; uc007dxk.1; uc007dxl.1	TC0100001736.mm.1	20.393	20.5348	20.9663	21.259	29.446	28.2465	31.125	24.59	dynein, axonemal, heavy chain 14	Multiple_Complex
Srp9	NM_012058; ENSMUST00000027792; ENSMUST00000111018; BC039648; BC090254; NM_012058.3; OTTMUST00000052511; OTTMUST00000052512; uc007dxu.2; uc007dxv.2	TC0100001740.mm.1	16612.7	16612.7	9152.82	8902.53	2856.44	1152.06	9345.14	13777.2	signal recognition particle 9	Multiple_Complex
Susd4	NM_144796; ENSMUST00000085724; ENSMUST00000153348; ENSMUST00000155229; BC021842; NM_144796.4; OTTMUST00000066786; OTTMUST00000067235; OTTMUST00000067236; uc007dyk.1	TC0100001752.mm.1	18.0009	19.1597	22.9433	20.8215	29.2426	29.8571	22.9433	20.9663	sushi domain containing 4	Multiple_Complex
Aida	NM_181732; ENSMUST00000109166; BC057183; BC086763; NM_181732.4; uc008icu.2; uc012bom.1; uc029quz.1	TC0100001755.mm.1	1038.29	1052.79	814.629	699.413	831.746	584.071	685.019	2256.7	axin interactor, dorsalization associated	Multiple_Complex
Taf1a	NM_001277957; NM_001277958; NM_001277959; NM_021466; ENSMUST00000097043; BC061106; BC138425; NM_021466.2; uc008idb.1; uc008idc.1; uc012boo.2; uc008icz.1; uc008ida.2	TC0100001756.mm.1	5996.9	5712.87	5792.62	4737.79	929.3	935.763	1341.84	2272.4	TATA box binding protein (Tbp)-associated factor, RNA polymerase I, A; TATA box binding protein (Tbp)-associated factor, RNA polymerase I, A (Taf1a), mRNA.	Multiple_Complex
Rab3gap2	NM_001163754; ENSMUST00000069652; BC057872; NM_001163754.1; uc007dyu.2; uc007dyv.2; uc007dyw.2; uc007dyx.1	TC0100001779.mm.1	685.019	749.612	613.109	515.561	3040.3	1722.16	1002.93	1351.18	RAB3 GTPase activating protein subunit 2	Multiple_Complex
Snora36b; Mir664	NR_034044; NR_035529; NR_034044.1; uc011wxz.1	TC0100001781.mm.1	18.7654	27.2843	31.3414	32	66.257	70.0348	43.7133	20.2521	small nucleolar RNA, H/ACA box 36B; microRNA 664	Multiple_Complex
Mir215	NR_029908; NR_029908.1; uc011wyc.1	TC0100001783.mm.1	68.5935	63.5579	59.7141	70.5219	74.5429	68.1197	116.162	64.8934	microRNA 215	Multiple_Complex
Bpnt1	NM_011794; ENSMUST00000027916; ENSMUST00000110965; ENSMUST00000137757; ENSMUST00000151769; BC011036; NM_011794.3; OTTMUST00000050820; OTTMUST00000050821; OTTMUST00000050822; OTTMUST00000050823; uc007dzc.1; uc007dzd.1	TC0100001786.mm.1	145.009	126.238	167.73	190.019	80.4489	82.7106	95.0095	116.97	bisphosphate 3-nucleotidase 1; bisphosphate 3'-nucleotidase 1	Multiple_Complex
Eprs	NM_029735; ENSMUST00000046514; BC141049; NM_029735.1; uc007dze.1; uc007dzf.1; uc007dzg.1; uc007dzh.1	TC0100001787.mm.1	1964.57	2048	1871.53	1734.13	261.379	250.732	308.687	916.506	glutamyl-prolyl-tRNA synthetase	Multiple_Complex
Slc30a10	NM_001033286; ENSMUST00000061093; NM_001033286.2; uc007dzl.1; uc007dzk.1	TC0100001788.mm.1	18.6357	18.8959	18.6357	20.393	22.3159	37.014	20.9663	20.2521	solute carrier family 30, member 10; solute carrier family 30, member 10 (Slc30a10), mRNA.	Multiple_Complex
Gpatch2	NM_026367; ENSMUST00000044812; ENSMUST00000065573; ENSMUST00000097443; ENSMUST00000110943; ENSMUST00000159748; ENSMUST00000160471; ENSMUST00000160481; ENSMUST00000160570; ENSMUST00000161260; BC054810; NM_026367.4; OTTMUST00000055489; OTTMUST00000055490; OTTMUST00000055491; OTTMUST00000055493; OTTMUST00000055646; OTTMUST00000055647; OTTMUST00000055648; OTTMUST00000055649; uc007dzx.2; uc007dzy.2; u…	TC0100001804.mm.1	200.854	188.706	183.546	158.683	132.514	106.891	74.028	148.056	G patch domain containing 2	Multiple_Complex
Esrrg	NM_001243792; NM_011935; ENSMUST00000027906; ENSMUST00000110938; ENSMUST00000110939; ENSMUST00000127489; ENSMUST00000152927; BC082324; NM_001243792.1; NM_011935.3; OTTMUST00000053412; OTTMUST00000053413; OTTMUST00000053430; OTTMUST00000053595; OTTMUST00000053596; uc007eaa.2; uc007eab.2; uc011wyg.2	TC0100001806.mm.1	111.43	112.986	88.647	88.647	156.498	150.123	88.647	119.428	estrogen-related receptor gamma	Multiple_Complex
Ush2a	NM_021408; ENSMUST00000060479; ENSMUST00000124358; ENSMUST00000127077; ENSMUST00000142159; ENSMUST00000142189; NM_021408.3; OTTMUST00000044109; OTTMUST00000044110; OTTMUST00000044111; OTTMUST00000044112; OTTMUST00000044113; uc007ead.1; uc007eae.1; uc007eaf.1; uc007eag.1; uc007eah.1	TC0100001812.mm.1	51.9842	49.8665	46.5271	44.6318	71.0124	61.8199	58.0812	56.1028	Usher syndrome 2A (autosomal recessive, mild)	Multiple_Complex
Ptpn14	NM_008976; ENSMUST00000027898; ENSMUST00000097442; ENSMUST00000128275; ENSMUST00000148129; BC167229; NM_008976.2; OTTMUST00000052440; OTTMUST00000064631; OTTMUST00000064632; uc007eas.1; uc007eat.1; uc007eau.1; uc007eav.1; uc007eaw.1; uc011wyk.1; uc011wyl.1	TC0100001821.mm.1	57.2816	55.3304	50.2134	51.6251	56.8859	58.892	44.3235	60.9688	protein tyrosine phosphatase, non-receptor type 14; Synthetic construct Mus musculus clone IMAGE:100068129, MGC:195746 protein tyrosine phosphatase, non-receptor type 14 (Ptpn14) mRNA, encodes complete protein.	Multiple_Complex
Angel2	NM_001199020; NM_021421; NR_037578; NR_037579; ENSMUST00000027947; ENSMUST00000066632; ENSMUST00000110899; ENSMUST00000123384; ENSMUST00000130298; ENSMUST00000134187; ENSMUST00000135364; ENSMUST00000137608; ENSMUST00000144693; ENSMUST00000146048; BC024907; NM_001199020.1; NM_021421.4; NR_037578.1; NR_037579.1; OTTMUST00000051004; OTTMUST00000051005; OTTMUST00000051006; OTTMUST00000051007; OTTMUST…	TC0100001831.mm.1	519.147	508.463	424.612	436.549	903.888	776.047	639.145	709.176	angel homolog 2 (Drosophila)	Multiple_Complex
A230020J21Rik	NR_027298; NR_027298.1; uc011wyo.1	TC0100001833.mm.1	12.7286	12.7286	14.6213	13.0864	13.5479	13.2691	18.8959	12.8171	RIKEN cDNA A230020J21 gene	Multiple_Complex
Batf3	NM_030060; ENSMUST00000027943; BC117083; BC117085; NM_030060.2; uc007ecc.1; uc007ecd.1	TC0100001837.mm.1	50.2134	53.0765	45.8866	48.8403	56.493	59.7141	94.3532	57.2816	basic leucine zipper transcription factor, ATF-like 3	Multiple_Complex
Ints7	NM_178632; ENSMUST00000045450; BC054120; NM_178632.5; uc007eco.1; uc007ecp.1; uc007ecq.1; uc007ecr.1	TC0100001853.mm.1	709.176	643.591	630.346	648.067	97.6806	128.89	40.5042	174.853	integrator complex subunit 7	Multiple_Complex
Lpgat1	NM_001134829; NM_172266; ENSMUST00000110855; ENSMUST00000110856; ENSMUST00000130876; ENSMUST00000133076; ENSMUST00000138494; BC013667; NM_001134829.1; NM_172266.3; OTTMUST00000051902; OTTMUST00000051903; OTTMUST00000051904; OTTMUST00000051905; OTTMUST00000051906; uc007ecs.3; uc007ect.3; uc007ecu.3	TC0100001855.mm.1	464.65	477.713	548.748	474.413	374.806	250.732	294.067	477.713	lysophosphatidylglycerol acyltransferase 1	Multiple_Complex
Nek2	NM_010892; ENSMUST00000027931; ENSMUST00000126446; ENSMUST00000136733; ENSMUST00000150839; BC010302; BC011316; BC057576; NM_010892.3; OTTMUST00000066790; OTTMUST00000066791; OTTMUST00000066792; OTTMUST00000066793; uc007ecw.2; uc007ecx.2; uc011wyv.1	TC0100001858.mm.1	4182.07	4039.61	4039.61	3743.05	849.223	760.076	2019.8	2120.22	NIMA (never in mitosis gene a)-related expressed kinase 2	Multiple_Complex
Slc30a1	NM_009579; ENSMUST00000044954; ENSMUST00000161756; BC052166; NM_009579.3; OTTMUST00000051885; OTTMUST00000051886; uc007edc.1	TC0100001859.mm.1	224.411	213.783	164.279	157.586	121.095	99.0442	113.772	168.897	solute carrier family 30 (zinc transporter), member 1	Multiple_Complex
Kcnh1	NM_001038607; NM_010600; ENSMUST00000078470; ENSMUST00000110844; ENSMUST00000151152; BC109012; BC109013; NM_001038607.1; NM_010600.2; OTTMUST00000060175; OTTMUST00000060176; OTTMUST00000060177	TC0100001863.mm.1	1606.83	1595.73	1595.73	1468.37	7643.41	6338.83	3125.78	2628.46	potassium voltage-gated channel, subfamily H (eag-related), member 1	Multiple_Complex
Irf6	NM_016851; ENSMUST00000076521; ENSMUST00000138826; ENSMUST00000140066; BC008515; NM_016851.2; OTTMUST00000083863; OTTMUST00000083864; OTTMUST00000083866; uc007edx.1; uc007edy.1; uc007edz.1	TC0100003872.mm.1	23.1029	23.1029	26.5382	26.1729	27.6652	25.2813	28.6408	24.2515	interferon regulatory factor 6	Multiple_Complex
A130010J15Rik	NM_001160359; NM_001160360; NM_181048; ENSMUST00000110831; ENSMUST00000160077; ENSMUST00000161235; ENSMUST00000178744; BC055955; NM_001160359.1; NM_001160360.1; NM_181048.3; uc007eeb.2; uc011wza.1; uc011wzb.1	TC0100003873.mm.1	27.6652	31.125	23.5883	20.9663	22.3159	21.7057	28.84	28.2465	RIKEN cDNA A130010J15 gene	Multiple_Complex
Lamb3	NM_001277928; NM_008484; ENSMUST00000016315; ENSMUST00000159955; ENSMUST00000161526; ENSMUST00000162180; ENSMUST00000162977; BC008516; NM_008484.2; OTTMUST00000062678; OTTMUST00000062679; OTTMUST00000062716; OTTMUST00000062717; uc007eee.1; uc007eek.1	TC0100001871.mm.1	20.1122	20.2521	21.8566	21.7057	24.2515	29.446	24.761	20.8215	laminin, beta 3	Multiple_Complex
Plxna2	NM_008882; ENSMUST00000027952; ENSMUST00000124785; ENSMUST00000125381; ENSMUST00000135664; BC068155; NM_008882.2; OTTMUST00000042096; OTTMUST00000042105; OTTMUST00000042106; OTTMUST00000042107; uc007een.1; uc007eeo.1	TC0100001877.mm.1	235.568	247.28	230.72	227.544	445.722	359.538	265.028	286.026	plexin A2	Multiple_Complex
Cd34	NM_001111059; NM_133654; ENSMUST00000016638; ENSMUST00000110815; BC006607; NM_001111059.1; NM_133654.3; uc007eep.2; uc007eeq.2	TC0100001882.mm.1	14.0257	14.0257	16.1113	14.723	21.7057	22.7848	19.8353	17.0299	CD34 antigen	Multiple_Complex
A330023F24Rik; Mir29c; Mir29b-2	NR_015566; NR_029745; NR_029809; NR_015566.2; NR_029745.1; NR_029809.1; uc007eer.2; uc007ees.1; uc011wzf.1; uc011wzg.1	TC0100001883.mm.1	20.5348	18.6357	21.259	22.6274	29.2426	32.4467	33.3589	23.2636	RIKEN cDNA A330023F24 gene; microRNA 29c; microRNA 29b-2	Multiple_Complex
Xkr4	NM_001011874; ENSMUST00000070533; ENSMUST00000159265; ENSMUST00000162897; NM_001011874.1; OTTMUST00000065166; OTTMUST00000086624; OTTMUST00000086625; uc007aeu.1	TC0100001889.mm.1	24.59	24.2515	30.6965	26.3549	39.6706	47.1766	56.1028	26.3549	X Kell blood group precursor related family member 4	Multiple_Complex
Rp1	NM_001195662; NM_011283; ENSMUST00000027032; BC120927; BC120928; NM_001195662.1; NM_011283.2; uc007aew.1; uc007aex.2	TC0100001904.mm.1	28.6408	26.3549	27.2843	26.5382	34.5353	58.892	35.261	30.0647	retinitis pigmentosa 1 (human)	Multiple_Complex
Mrpl15	NM_001177658; NM_025300; NR_033530; ENSMUST00000045689; ENSMUST00000115538; ENSMUST00000130201; ENSMUST00000132625; ENSMUST00000146665; ENSMUST00000156816; BC021304; BC027233; NM_001177658.1; NM_025300.4; NR_033530.1; OTTMUST00000072659; OTTMUST00000072660; OTTMUST00000072661; OTTMUST00000072662; OTTMUST00000072663; OTTMUST00000072664; uc007afd.3; uc007afe.3; uc007aff.3	TC0100001909.mm.1	292.036	300.246	292.036	286.026	123.64	101.829	172.446	203.657	mitochondrial ribosomal protein L15	Multiple_Complex
Rgs20	NM_001177795; NM_021374; ENSMUST00000002533; ENSMUST00000118000; ENSMUST00000119256; ENSMUST00000133521; ENSMUST00000147158; ENSMUST00000156289; ENSMUST00000170566; BC116925; BC116929; NM_001177795.1; NM_021374.4; OTTMUST00000072687; OTTMUST00000072688; OTTMUST00000072704; OTTMUST00000072705; OTTMUST00000072706; OTTMUST00000072707; OTTMUST00000092053; uc007afl.2	TC0100001914.mm.1	15.5625	16.1113	17.5087	18.2522	21.4068	23.2636	28.2465	18.1261	regulator of G-protein signaling 20	Multiple_Complex
Gm17100	ENSMUST00000168963	TC0100001915.mm.1	28.443	30.6965	38.8542	38.5859	48.1679	31.125	25.9921	22.7848	predicted gene 17100 [Source:MGI Symbol;Acc:MGI:4937927]	Multiple_Complex
Gm26983	ENSMUST00000182051	TC0100001927.mm.1	942.272	861.078	1243.34	1629.26	1089.92	1595.73	522.758	568.1	predicted gene, 26983 [Source:MGI Symbol;Acc:MGI:5504098]	Multiple_Complex
Sntg1	NM_027671; ENSMUST00000115484; ENSMUST00000115488; ENSMUST00000126083; ENSMUST00000132064; ENSMUST00000134075; ENSMUST00000135046; ENSMUST00000140295; ENSMUST00000140302; ENSMUST00000144593; BC160286; NM_027671.4; OTTMUST00000082929; OTTMUST00000082930; OTTMUST00000082931; OTTMUST00000082932; OTTMUST00000082933; OTTMUST00000082934; OTTMUST00000082935; OTTMUST00000082936	TC0100001932.mm.1	24.2515	24.0839	25.6342	26.5382	33.3589	34.7755	36.2523	29.8571	syntrophin, gamma 1; Synthetic construct Mus musculus clone IMAGE:100063934, MGC:193401 syntrophin, gamma 1 (Sntg1) mRNA, encodes complete protein.	Multiple_Complex
Gm16284	ENSMUST00000140995	TC0100001934.mm.1	1458.23	1184.45	1640.59	1499.22	1314.23	1176.27	1031.12	1097.5	predicted gene 16284 [Source:MGI Symbol;Acc:MGI:3826541]	Multiple_Complex
Gm15452	ENSMUST00000119877	TC0100001937.mm.1	61572.6	59064.4	74761.1	87076.8	90147.5	85877.9	54350.3	71220.3	predicted gene 15452 [Source:MGI Symbol;Acc:MGI:3768636]	Multiple_Complex
Gm6152	ENSMUST00000151704	TC0100001938.mm.1	74.028	69.551	71.0124	69.551	56.8859	57.68	65.3448	61.8199	predicted gene 6152 [Source:MGI Symbol;Acc:MGI:3648859]	Multiple_Complex
Gm7493	ENSMUST00000085919	TC0100001939.mm.1	4737.79	4705.07	5007.93	5007.93	3983.99	1884.54	6746.86	4039.61	predicted gene 7493 [Source:MGI Symbol;Acc:MGI:3643471]	Multiple_Complex
2610203C22Rik	NR_015470; NR_015470.1; uc007agn.2; uc007ago.2	TC0100001942.mm.1	24.9333	29.2426	27.2843	28.6408	26.5382	39.9466	31.5594	32.8996	RIKEN cDNA 2610203C22 gene	Multiple_Complex
Mybl1	NM_008651; ENSMUST00000088658; ENSMUST00000115468; ENSMUST00000160022; ENSMUST00000160451; BC103533; NM_008651.2; OTTMUST00000088260; OTTMUST00000088261; OTTMUST00000088262; OTTMUST00000088263	TC0100001943.mm.1	3104.19	3125.78	2062.24	1795.29	2105.58	1746.2	4576.41	4837.35	myeloblastosis oncogene-like 1	Multiple_Complex
Vcpip1	NM_173443; ENSMUST00000057438; BC059209; NM_173443.2; OTTMUST00000052491	TC0100001944.mm.1	1698.45	1734.13	1016.93	652.575	263.197	206.5	1060.11	1820.35	valosin containing protein (p97)/p47 complex interacting protein 1	Multiple_Complex
Tcf24	NM_001285425; ENSMUST00000097824; ENSMUST00000185184; OTTMUST00000118029; XM_003688767.1; XR_140429.1	TC0100001949.mm.1	36.7583	39.1245	41.3553	41.0696	36.5044	42.5179	40.5042	41.0696	transcription factor 24	Multiple_Complex
Ppp1r42	NM_027033; NM_145692; ENSMUST00000027049; ENSMUST00000124874; ENSMUST00000130102; ENSMUST00000147000; ENSMUST00000155163; ENSMUST00000176398; BC022722; NM_027033.4; NM_145692.1; OTTMUST00000065319; OTTMUST00000065320; OTTMUST00000065321; OTTMUST00000065323; OTTMUST00000065324; OTTMUST00000110132	TC0100001950.mm.1	32	31.779	27.2843	30.0647	30.2738	41.9326	34.0598	43.7133	protein phosphatase 1, regulatory subunit 42 (Ppp1r42), transcript variant 1, mRNA.; protein phosphatase 1, regulatory subunit 42	Multiple_Complex
Cops5	NM_001277101; NM_013715; NR_102282; ENSMUST00000027050; ENSMUST00000139578; ENSMUST00000150509; BC046753; NM_013715.1; OTTMUST00000072996; OTTMUST00000072997; OTTMUST00000072998; uc007ahe.1; uc007ahf.1	TC0100001952.mm.1	1176.27	1031.12	1060.11	942.272	347.291	337.794	192.672	1052.79	COP9 (constitutive photomorphogenic) homolog, subunit 5 (Arabidopsis thaliana); COP9 (constitutive photomorphogenic) homolog, subunit 5 (Arabidopsis thaliana) (Cops5), mRNA.	Multiple_Complex
Arfgef1	NM_001102430; ENSMUST00000088615; ENSMUST00000128834; ENSMUST00000131556; ENSMUST00000142497; ENSMUST00000156563; NM_001102430.1; OTTMUST00000085576; OTTMUST00000085577; OTTMUST00000085578; OTTMUST00000085579; OTTMUST00000085580; uc007ahn.1; uc007aho.1; uc007ahp.1	TC0100001955.mm.1	9809.75	9946.68	9877.98	8719.32	17682.1	12077.2	9741.98	12245.8	ADP-ribosylation factor guanine nucleotide-exchange factor 1(brefeldin A-inhibited)	Multiple_Complex
Cpa6	NM_001289497; NM_177834; ENSMUST00000035577; ENSMUST00000140938; ENSMUST00000147575; ENSMUST00000153695; BC119559; BC119560; NM_177834.3; OTTMUST00000059299; OTTMUST00000059300; OTTMUST00000059301; OTTMUST00000059302; uc007ahq.1; uc007ahr.1	TC0100001957.mm.1	17.3878	16.9123	18.2522	17.6305	24.761	31.5594	22.1618	18.7654	carboxypeptidase A6; carboxypeptidase A6 (Cpa6), mRNA.	Multiple_Complex
Mir467e	NR_030645; uc029qmw.1	TC0100001961.mm.1	62.6829	25.4572	71.5064	60.9688	104.691	421.679	181.019	48.1679	microRNA 467e	Multiple_Complex
Slco5a1	NM_172841; ENSMUST00000115402; ENSMUST00000115403; ENSMUST00000133201; ENSMUST00000136197; ENSMUST00000146763; ENSMUST00000147606; BC117943; NM_172841.2; OTTMUST00000053228; OTTMUST00000053229; OTTMUST00000053230; OTTMUST00000053231; OTTMUST00000053232; OTTMUST00000053233; uc007aif.1; uc007aig.1; uc007aih.1; uc007aii.1	TC0100001967.mm.1	44.9422	46.5271	43.1115	44.6318	59.3016	49.8665	44.0173	58.0812	solute carrier organic anion transporter family, member 5A1	Multiple_Complex
Ncoa2	NM_001077695; NM_008678; ENSMUST00000006037; ENSMUST00000068304; ENSMUST00000081713; ENSMUST00000124088; ENSMUST00000133232; ENSMUST00000139970; ENSMUST00000143603; ENSMUST00000145280; ENSMUST00000146784; ENSMUST00000147927; BC053387; NM_001077695.1; NM_008678.2; OTTMUST00000051358; OTTMUST00000051367; OTTMUST00000051368; OTTMUST00000051369; OTTMUST00000051370; OTTMUST00000051371; OTTMUST00000051…	TC0100001969.mm.1	968.763	1038.29	849.223	754.826	1360.57	1045.52	1226.22	786.88	nuclear receptor coactivator 2 (Ncoa2), transcript variant 2, mRNA.; nuclear receptor coactivator 2	Multiple_Complex
Lactb2	NM_145381; ENSMUST00000027071; ENSMUST00000156222; BC004045; NM_145381.2; OTTMUST00000051280; OTTMUST00000051281; uc007aiu.2	TC0100001980.mm.1	604.668	522.758	560.278	613.109	265.028	270.597	548.748	288.015	lactamase, beta 2	Multiple_Complex
Gm5523	NR_004447; uc011wil.1	TC0100001983.mm.1	349.706	427.565	396.177	390.722	393.44	451.944	1795.29	326.288	glyceraldehyde-3-phosphate dehydrogenase pseudogene	Multiple_Complex
Eya1	NM_001252192; NM_010164; ENSMUST00000027066; ENSMUST00000080664; ENSMUST00000168081; BC060260; BC066860; NM_001252192.1; NM_010164.2; uc007aiw.1; uc007aix.1; uc007aiy.1; uc007aiz.1	TC0100001985.mm.1	843.357	861.078	576.03	533.742	1105.13	776.047	661.685	2256.7	eyes absent 1 homolog (Drosophila)	Multiple_Complex
Gm10566	ENSMUST00000086739	TC0100001991.mm.1	21027.6	24154.4	19619.5	20882.4	16844.6	14263.1	26432	20171.1	predicted gene 10566 [Source:MGI Symbol;Acc:MGI:3642220]	Multiple_Complex
Rpl7	NM_011291; ENSMUST00000058437; ENSMUST00000125005; ENSMUST00000140597; ENSMUST00000141217; ENSMUST00000149566; ENSMUST00000151017; BC025909; BC051261; BC086786; BC096452; NM_011291.5; OTTMUST00000041073; OTTMUST00000041074; OTTMUST00000041075; OTTMUST00000041076; OTTMUST00000041077; OTTMUST00000041078; uc007ajl.3	TC0100001996.mm.1	604.668	588.134	630.346	600.491	90.5097	83.2859	374.806	430.539	ribosomal protein L7	Multiple_Complex
Stau2	NM_001111272; NM_025303; ENSMUST00000027052; ENSMUST00000054668; ENSMUST00000115359; ENSMUST00000115360; ENSMUST00000127420; ENSMUST00000128957; ENSMUST00000131257; ENSMUST00000144138; ENSMUST00000145092; ENSMUST00000149320; ENSMUST00000151888; ENSMUST00000153966; ENSMUST00000159558; ENSMUST00000162007; ENSMUST00000162435; ENSMUST00000162627; ENSMUST00000162751; BC025118; NM_001111272.1; NM_02530…	TC0100001999.mm.1	132.514	152.219	125.366	130.69	209.383	178.527	142.025	167.73	staufen (RNA binding protein) homolog 2 (Drosophila)	Multiple_Complex
Ube2w	NM_001271016; NM_001271017; NM_025773; NR_073122; ENSMUST00000117146; ENSMUST00000132919; ENSMUST00000133639; ENSMUST00000136455; ENSMUST00000182080; ENSMUST00000182554; ENSMUST00000182984; BC020124; NM_025773.2; OTTMUST00000073645; OTTMUST00000073646; OTTMUST00000073647; OTTMUST00000073648; OTTMUST00000113103; OTTMUST00000113104; uc007ajs.1; uc007ajt.1; uc007aju.1	TC0100002002.mm.1	261.379	276.282	243.875	219.793	352.139	292.036	306.555	354.588	ubiquitin-conjugating enzyme E2W (putative); ubiquitin-conjugating enzyme E2W (putative) (Ube2w), transcript variant 1, mRNA.	Multiple_Complex
Crisp4	NM_030033; ENSMUST00000026876; ENSMUST00000115340; ENSMUST00000115344; ENSMUST00000130669; BC148787; NM_030033.1; OTTMUST00000053108; OTTMUST00000053109; OTTMUST00000053110; uc007aki.1; uc007akj.1; uc007akk.1	TC0100002019.mm.1	18.2522	15.8895	20.2521	20.393	22.4711	25.6342	24.59	18.7654	cysteine-rich secretory protein 4; Synthetic construct Mus musculus clone IMAGE:100015779, MGC:183434 cysteine-rich secretory protein 4 (Crisp4) mRNA, encodes complete protein.	Multiple_Complex
Defb44-ps	NR_002879; OTTMUST00000049515; uc007akl.1	TC0100002020.mm.1	31.779	27.6652	50.5626	39.3966	66.7178	82.1393	109.137	40.7859	defensin beta 44, pseudogene	Multiple_Complex
Gm2710; Gm10075	ENSMUST00000073196; ENSMUST00000162030	TC0100002025.mm.1	9741.98	8364.13	9541.5	8480.89	4870.99	3082.75	4269.94	6608.01	predicted gene 2710 [Source:MGI Symbol;Acc:MGI:3780879]; predicted gene 10075 [Source:MGI Symbol;Acc:MGI:3710521]	Multiple_Complex
Pkhd1	NM_153179; ENSMUST00000088448; ENSMUST00000128051; ENSMUST00000132647; ENSMUST00000147480; NM_153179.3; OTTMUST00000064911; OTTMUST00000064912; OTTMUST00000064913; OTTMUST00000064914; uc007akv.1; uc007akw.1	TC0100002028.mm.1	30.0647	27.8576	33.3589	33.1285	37.2715	41.0696	32.2226	32.2226	polycystic kidney and hepatic disease 1	Multiple_Complex
Tram2	NM_177409; ENSMUST00000037998; BC018212; NM_133252.2; NM_177409.3; OTTMUST00000065709; uc007alg.1	TC0100002038.mm.1	156.498	158.683	133.436	106.153	172.446	163.144	359.538	254.232	translocating chain-associating membrane protein 2	Multiple_Complex
Gm4956	NR_002858; uc007alm.1	TC0100002039.mm.1	70.0348	78.7932	80.4489	64.4452	32.6724	29.446	48.5029	49.8665	predicted gene 4956	Multiple_Complex
Kcnq5	NM_001160139; NM_023872; ENSMUST00000029667; ENSMUST00000115299; ENSMUST00000115300; ENSMUST00000134505; ENSMUST00000173058; ENSMUST00000173404; ENSMUST00000174183; BC157041; NM_001160139.1; NM_023872.3; OTTMUST00000047088; OTTMUST00000047089; OTTMUST00000054606; OTTMUST00000054607; OTTMUST00000097898; OTTMUST00000097899; OTTMUST00000097900; uc007alq.2; uc009uzv.1; uc011wio.1	TC0100002042.mm.1	25.2813	25.4572	25.2813	28.443	30.4844	35.5062	30.0647	24.4201	potassium voltage-gated channel, subfamily Q, member 5; Synthetic construct Mus musculus clone IMAGE:100063281, MGC:191051 potassium voltage-gated channel, subfamily Q, member 5 (Kcnq5) mRNA, encodes complete protein.	Multiple_Complex
4933415F23Rik	NM_025746; ENSMUST00000073179; BC115556; NM_025746.2; uc007alz.1	TC0100002061.mm.1	9.64646	10.1965	11.2356	10.6295	11.3924	17.3878	15.5625	11.9588	RIKEN cDNA 4933415F23 gene	Multiple_Complex
Ogfrl1	NM_001081079; ENSMUST00000027343; NM_001081079.1; uc007amb.1	TC0100002063.mm.1	143.013	147.033	101.829	77.1717	192.672	79.8932	140.07	123.64	opioid growth factor receptor-like 1	Multiple_Complex
Smap1	NM_028534; ENSMUST00000027339; ENSMUST00000129254; ENSMUST00000133398; ENSMUST00000136506; ENSMUST00000141330; ENSMUST00000148710; ENSMUST00000149737; BC006946; NM_028534.2; OTTMUST00000065602; OTTMUST00000065603; OTTMUST00000065604; OTTMUST00000065710; OTTMUST00000065711; OTTMUST00000065712; OTTMUST00000065836; uc007ami.1	TC0100002067.mm.1	382.681	418.766	300.246	282.088	401.707	317.365	556.408	617.374	small ArfGAP 1	Multiple_Complex
Sdhaf4	NM_026503; ENSMUST00000027338; ENSMUST00000155767; BC028981; uc007amj.2	TC0100002070.mm.1	50.5626	63.1189	34.7755	41.0696	133.436	97.0059	268.727	165.421	succinate dehydrogenase complex assembly factor 4	Multiple_Complex
Fam135a	NM_026604; ENSMUST00000027337; BC070446; NM_026604.4; uc007amk.2; uc007aml.2; uc007amn.2; uc011wiq.1	TC0100002071.mm.1	770.686	843.357	680.287	600.491	508.463	413.001	195.361	826.001	family with sequence similarity 135, member A	Multiple_Complex
Col19a1	NM_007733; ENSMUST00000051344; ENSMUST00000115244; ENSMUST00000144297; BC118970; NM_007733.2; OTTMUST00000050756; OTTMUST00000050757; OTTMUST00000050758; uc007amq.1; uc007amr.1; uc011wir.1	TC0100002073.mm.1	18.0009	18.3792	18.2522	19.1597	23.1029	27.6652	30.2738	20.1122	collagen, type XIX, alpha 1	Multiple_Complex
Gm10925	BC069931	TC0100002076.mm.1	565826	531607	550354	546552	546552	397336	598089	569762	predicted gene 10925	Multiple_Complex
Adgrb3	NM_175642; ENSMUST00000041838; ENSMUST00000126096; ENSMUST00000126626; ENSMUST00000134022; ENSMUST00000135518; ENSMUST00000146592; ENSMUST00000151309; ENSMUST00000153568; ENSMUST00000154102; BC099951; uc007amv.2; uc007amw.2; uc007amy.1; uc011wis.1	TC0100002081.mm.1	86.8227	80.4489	88.0347	88.647	150.123	139.102	129.787	165.421	adhesion G protein-coupled receptor B3	Multiple_Complex
Gm7846	ENSMUST00000145844	TC0100002105.mm.1	116.162	99.0442	97.6806	126.238	61.3929	50.2134	292.036	59.7141	predicted gene 7846 [Source:MGI Symbol;Acc:MGI:3645212]	Multiple_Complex
Phf3	NM_001081080; ENSMUST00000088310; BC137913; NM_001081080.1; uc007ane.1; uc007anf.1; uc007ang.1	TC0100002118.mm.1	15608	16158.4	16961.8	16046.8	25888.1	18951.2	18951.2	13682.1	PHD finger protein 3	Multiple_Complex
Ptp4a1; Gm13363	NM_011200; NR_002688; ENSMUST00000178652; BC055039; BC086787; BC094447; BC150972; BC150981; NM_011200.2; OTTMUST00000050557; OTTMUST00000050558; OTTMUST00000050559; OTTMUST00000050560; OTTMUST00000050561; OTTMUST00000111880; uc007anh.1; uc007ani.1	TC0100002121.mm.1	14362.3	13682.1	13493.7	11993.8	11113.3	7750.1	10513.8	15286.8	protein tyrosine phosphatase 4a1; predicted gene 13363	Multiple_Complex
4931428L18Rik	NR_033445; BC147514; BC147546; BC172083; NR_033445.1; uc007anj.2; uc007anl.2	TC0100002127.mm.1	135.298	151.167	72.0037	88.0347	296.112	288.015	99.7331	481.036	RIKEN cDNA 4931428L18 gene	Multiple_Complex
Gm9839	NM_001199956; ENSMUST00000050429; NM_001199956.1; uc011wiv.1	TC0100002131.mm.1	19.0273	19.5622	20.6776	21.4068	39.6706	45.2548	47.5048	20.393	predicted gene 9839	Multiple_Complex
Prim2	NM_008922; ENSMUST00000027312; BC019500; NM_008922.1; uc007anq.1; uc007anr.1	TC0100002136.mm.1	935.763	776.047	797.865	685.019	171.255	227.544	188.706	484.382	DNA primase, p58 subunit	Multiple_Complex
Bag2	NM_145392; ENSMUST00000044691; ENSMUST00000155484; BC016230; BC028944; NM_145392.2; OTTMUST00000051772; OTTMUST00000051773; uc007any.1	TC0100002140.mm.1	16	16.7955	15.2422	17.0299	15.7797	18.7654	17.1484	14.5203	BCL2-associated athanogene 2	Multiple_Complex
Zfp451	NM_133817; ENSMUST00000019861; ENSMUST00000044455; ENSMUST00000115164; ENSMUST00000115167; ENSMUST00000125723; ENSMUST00000130376; ENSMUST00000139143; ENSMUST00000140163; ENSMUST00000143591; ENSMUST00000151055; BC019546; BC062154; NM_133817.2; OTTMUST00000051953; OTTMUST00000051954; OTTMUST00000051955; OTTMUST00000051956; OTTMUST00000051957; OTTMUST00000051958; OTTMUST00000051959; OTTMUST00000051…	TC0100002141.mm.1	544.958	537.455	508.463	410.148	364.557	210.839	328.557	548.748	zinc finger protein 451	Multiple_Complex
Gm15455	NM_001161816; ENSMUST00000171875; NM_001161816.1; uc011wiy.1	TC0100002142.mm.1	84695.6	82379.6	97289.7	82952.6	19349.4	8306.36	28924.4	48308.9	predicted gene 15455	Multiple_Complex
Bend6	NM_177235; ENSMUST00000062289; ENSMUST00000115161; ENSMUST00000126724; ENSMUST00000129464; ENSMUST00000139700; BC057378; NM_177235.3; OTTMUST00000050966; OTTMUST00000050967; OTTMUST00000050968; OTTMUST00000050969; OTTMUST00000077983; uc007aoc.1; uc007aod.1; uc007aoe.1; uc011wiz.1	TC0100002143.mm.1	37.5307	35.0174	34.0598	32.8996	35.7532	31.125	41.9326	30.2738	BEN domain containing 6	Multiple_Complex
AA619741	NR_033627; NR_033627.1; uc011wjd.1	TC0100002157.mm.1	3040.3	3104.19	1782.89	1845.76	6984.79	4329.55	12245.8	5113.16	PHD finger protein 19 pseudogene; expressed sequence AA619741 (AA619741), non-coding RNA.	Multiple_Complex
Fam168b	NM_001160235; NM_001160236; NM_174997; ENSMUST00000047534; ENSMUST00000140534; ENSMUST00000167518; ENSMUST00000170092; BC040511; BC043098; BC059247; NM_001160235.1; NM_001160236.1; NM_174997.2; OTTMUST00000051861; OTTMUST00000051862; uc007apj.2; uc011wje.1; uc011wjf.1	TC0100002163.mm.1	670.921	675.588	666.287	568.1	458.253	491.143	504.951	442.643	family with sequence similarity 168, member B	Multiple_Complex
Uggt1	NM_198899; ENSMUST00000046875; ENSMUST00000172592; ENSMUST00000173082; ENSMUST00000173166; ENSMUST00000173250; ENSMUST00000173999; ENSMUST00000174142; ENSMUST00000174224; ENSMUST00000174266; ENSMUST00000174716; BC062936; BC068283; NM_198899.2; OTTMUST00000097354; OTTMUST00000097355; OTTMUST00000097356; OTTMUST00000097357; OTTMUST00000097358; OTTMUST00000097359; OTTMUST00000097360; OTTMUST00000097…	TC0100002175.mm.1	564.175	552.565	604.668	560.278	101.829	92.4115	87.4266	148.056	UDP-glucose glycoprotein glucosyltransferase 1	Multiple_Complex
Neurl3	NM_153408; ENSMUST00000056946; BC056622; NM_153408.2; uc007aps.1; uc007apt.1	TC0100002177.mm.1	29.6508	22.1618	26.1729	29.446	29.6508	28.6408	27.4741	29.2426	neuralized E3 ubiquitin protein ligase 3; neuralized homolog 3 homolog (Drosophila)	Multiple_Complex
Kansl3	NM_172652; ENSMUST00000010597; BC132293; NM_172652.3; uc007apz.1; uc007aqa.1; uc011wji.1; uc011wjj.1	TC0100002179.mm.1	4359.66	4359.66	4451.27	3717.2	515.561	407.315	172.446	709.176	KAT8 regulatory NSL complex subunit 3	Multiple_Complex
Lman2l	NM_001013374; ENSMUST00000001171; ENSMUST00000115011; ENSMUST00000123583; ENSMUST00000125304; ENSMUST00000134594; ENSMUST00000152088; BC027226; BC046969; NM_001013374.1; OTTMUST00000051147; OTTMUST00000051148; OTTMUST00000051149; OTTMUST00000051150; OTTMUST00000051151; OTTMUST00000051152; uc007aqc.1; uc007aqd.1; uc007aqe.1; uc007aqf.1	TC0100002184.mm.1	101.829	114.563	90.5097	78.249	115.36	104.691	102.537	144.007	lectin, mannose-binding 2-like	Multiple_Complex
Ankrd23	NM_153502; ENSMUST00000054665; BC132370; BC138797; BC145421; NM_153502.3; uc007aql.1; uc007aqm.1; uc011wjl.1	TC0100003874.mm.1	122.786	128.89	99.7331	91.1392	54.1917	60.1295	56.8859	170.072	ankyrin repeat domain 23	Multiple_Complex
Ankrd39	NM_026241; ENSMUST00000001172; BC117004; BC119100; NM_026241.3; uc007aqo.1; uc007aqp.1; uc011wjm.1	TC0100003875.mm.1	62.6829	62.2499	68.1197	68.1197	64.4452	69.551	55.7152	53.4456	ankyrin repeat domain 39	Multiple_Complex
Sema4c	NM_001126047; ENSMUST00000027295; ENSMUST00000114990; ENSMUST00000114991; ENSMUST00000114992; ENSMUST00000123055; ENSMUST00000128104; ENSMUST00000136452; ENSMUST00000154493; NM_001126047.1; OTTMUST00000049349; OTTMUST00000049350; OTTMUST00000049351; OTTMUST00000049352; OTTMUST00000049353; OTTMUST00000049354; OTTMUST00000049355; OTTMUST00000049356; uc007aqq.2; uc007aqr.2; uc007aqs.2	TC0100002187.mm.1	51.2685	49.18	54.1917	60.5477	63.1189	66.257	49.8665	52.3457	sema domain, immunoglobulin domain (Ig), transmembrane domain (TM) and short cytoplasmic domain, (semaphorin) 4C	Multiple_Complex
Fam178b	NM_001126046; NM_027957; NM_201365; ENSMUST00000027294; ENSMUST00000114981; ENSMUST00000114986; ENSMUST00000128412; ENSMUST00000131336; ENSMUST00000142789; ENSMUST00000170295; BC050210; NM_001126046.1; NM_027957.1; NM_201365.2; OTTMUST00000051776; OTTMUST00000051777; OTTMUST00000051778; OTTMUST00000051779; OTTMUST00000051781; OTTMUST00000087259; uc007aqu.2; uc007aqv.3; uc011wjn.1	TC0100002188.mm.1	60.5477	56.1028	53.4456	56.8859	44.9422	46.8507	41.0696	48.8403	family with sequence similarity 178, member B	Multiple_Complex
Actr1b	NM_146107; ENSMUST00000043951; ENSMUST00000159448; ENSMUST00000159675; ENSMUST00000160043; ENSMUST00000160084; ENSMUST00000162662; ENSMUST00000162684; BC023020; NM_146107.2; OTTMUST00000086602; OTTMUST00000086603; OTTMUST00000086604; OTTMUST00000086605; OTTMUST00000086606; OTTMUST00000086607; OTTMUST00000086608; uc007aqx.1	TC0100002189.mm.1	47.5048	45.2548	41.6429	44.0173	50.5626	48.8403	50.2134	47.5048	ARP1 actin-related protein 1B, centractin beta; ARP1 actin-related protein 1 homolog B, centractin beta (yeast)	Multiple_Complex
Gm18828	ENSMUST00000180475; ENSMUST00000181035	TC0100002191.mm.1	23.7524	25.2813	24.2515	24.59	26.7228	29.8571	18.507	17.2677	predicted gene, 18828 [Source:MGI Symbol;Acc:MGI:5011013]	Multiple_Complex
Coa5	NM_198006; ENSMUST00000027286; BC002137; NM_198006.4; OTTMUST00000052497; uc007aro.2	TC0100002203.mm.1	238.856	261.379	200.854	195.361	186.108	188.706	530.056	685.019	cytochrome C oxidase assembly factor 5	Multiple_Complex
Mgat4a	NM_173870; ENSMUST00000042161; ENSMUST00000143636; ENSMUST00000148047; ENSMUST00000149791; ENSMUST00000151952; ENSMUST00000154819; BC165942; NM_173870.2; OTTMUST00000085506; OTTMUST00000085524; OTTMUST00000085536; OTTMUST00000085537; OTTMUST00000085538; uc007arr.2; uc007aru.2	TC0100002204.mm.1	477.713	461.44	382.681	326.288	362.039	270.597	261.379	1389.16	mannoside acetylglucosaminyltransferase 4, isoenzyme A; Synthetic construct Mus musculus clone IMAGE:100066242, MGC:195379 mannoside acetylglucosaminyltransferase 4, isoenzyme A (Mgat4a) mRNA, encodes complete protein.	Multiple_Complex
4930594C11Rik	NR_024017; uc011wjs.1	TC0100002205.mm.1	44.0173	47.1766	55.3304	55.7152	40.7859	42.2243	33.5909	24.761	G1 to S phase transition pseudogene	Multiple_Complex
Tsga10	NM_207228; ENSMUST00000041815; ENSMUST00000088072; ENSMUST00000114902; ENSMUST00000123082; ENSMUST00000134024; ENSMUST00000151735; ENSMUST00000155852; BC066782; NM_207228.2; OTTMUST00000058199; OTTMUST00000058200; OTTMUST00000058201; OTTMUST00000058202; OTTMUST00000058203; OTTMUST00000058204; OTTMUST00000058205; uc007asa.1; uc007asb.1; uc007asc.1; uc007asd.1	TC0100002209.mm.1	123.64	130.69	86.2229	78.249	131.599	108.383	321.795	292.036	testis specific 10	Multiple_Complex
Mitd1	NM_026913; ENSMUST00000027257; ENSMUST00000127170; ENSMUST00000131754; ENSMUST00000138806; ENSMUST00000139725; BC020137; NM_026913.2; OTTMUST00000065724; OTTMUST00000065791; OTTMUST00000065792; OTTMUST00000065793; OTTMUST00000086539; uc007asi.1	TC0100002210.mm.1	146.018	150.123	108.383	83.2859	71.0124	66.7178	200.854	186.108	MIT, microtubule interacting and transport, domain containing 1	Multiple_Complex
Lyg1	NM_027111; ENSMUST00000027254; ENSMUST00000114894; ENSMUST00000144184; BC119394; BC119396; NM_027111.3; OTTMUST00000052642; OTTMUST00000052643; uc007asl.1	TC0100002212.mm.1	18.0009	17.6305	21.4068	19.9733	21.8566	27.4741	23.5883	21.7057	lysozyme G-like 1	Multiple_Complex
Txndc9	NM_172054; ENSMUST00000072243; ENSMUST00000160254; ENSMUST00000161323; ENSMUST00000162031; ENSMUST00000162058; ENSMUST00000162472; BC022947; BC083077; NM_172054.4; OTTMUST00000065804; OTTMUST00000065805; OTTMUST00000065806; OTTMUST00000065870; OTTMUST00000065871; OTTMUST00000065872; uc007asm.1; uc007asn.1	TC0100002213.mm.1	294.067	284.05	230.72	203.657	99.0442	86.2229	139.102	202.251	thioredoxin domain containing 9	Multiple_Complex
Aff3	NM_010678; ENSMUST00000027250; ENSMUST00000039827; ENSMUST00000095027; ENSMUST00000134963; ENSMUST00000136641; ENSMUST00000142875; NM_010678.2; OTTMUST00000047163; OTTMUST00000047164; OTTMUST00000076584; OTTMUST00000076585; uc007asu.1	TC0100002215.mm.1	81.5719	88.647	66.7178	62.2499	160.898	102.537	100.427	106.153	AF4/FMR2 family, member 3 (Aff3), mRNA.; AF4/FMR2 family, member 3	Multiple_Complex
Lonrf2	NM_001029878; ENSMUST00000039612; ENSMUST00000147695; BC139127; BC139130; NM_001029878.1; OTTMUST00000065718; uc007asx.1	TC0100002228.mm.1	46.5271	46.2057	45.8866	41.3553	56.493	54.1917	40.7859	54.5686	LON peptidase N-terminal domain and ring finger 2	Multiple_Complex
Chst10	NM_145142; ENSMUST00000027249; BC132223; BC132225; NM_145142.2; uc007asy.1; uc007asz.1; uc007ata.1; uc011wjt.1	TC0100002229.mm.1	19.6983	19.5622	20.8215	20.8215	23.1029	24.0839	26.3549	23.4254	carbohydrate sulfotransferase 10	Multiple_Complex
Gm20428	ENSMUST00000174365	TC0100002234.mm.1	97.6806	87.4266	85.0359	93.0542	62.2499	74.5429	115.36	77.1717	predicted gene 20428 [Source:MGI Symbol;Acc:MGI:5141893]	Multiple_Complex
Rnf149	NM_001033135; ENSMUST00000062525; ENSMUST00000153381; BC115968; NM_001033135.3; OTTMUST00000051939; OTTMUST00000051940; uc007atl.3	TC0100002237.mm.1	178.527	158.683	205.074	195.361	134.364	112.986	145.009	148.056	ring finger protein 149	Multiple_Complex
Rfx8	NM_001145660; ENSMUST00000126760; ENSMUST00000151913; NM_001145660.1; OTTMUST00000085534; OTTMUST00000085535; uc007atn.2	TC0100002242.mm.1	20.1122	18.8959	19.2929	19.1597	19.4271	21.7057	24.9333	21.259	regulatory factor X 8	Multiple_Complex
Mfsd9	NM_172499; ENSMUST00000039672; ENSMUST00000131390; ENSMUST00000144385; BC057633; NM_172499.2; OTTMUST00000054180; OTTMUST00000054181; OTTMUST00000054182; uc007auo.1; uc007aup.1	TC0100002251.mm.1	57.68	75.5835	62.6829	66.7178	99.0442	74.5429	87.4266	150.123	major facilitator superfamily domain containing 9	Multiple_Complex
Tgfbrap1	NM_001013025; ENSMUST00000095014; BC138866; BC138867; NM_001013025.2; uc007avi.1; uc007ave.1; uc007avf.1; uc007avg.1; uc007avh.1	TC0100002260.mm.1	634.73	588.134	552.565	458.253	685.019	396.177	229.126	666.287	transforming growth factor, beta receptor associated protein 1; transforming growth factor, beta receptor associated protein 1 (Tgfbrap1), mRNA.	Multiple_Complex
Uxs1	NM_026430; ENSMUST00000076997; ENSMUST00000126008; ENSMUST00000128261; ENSMUST00000134860; ENSMUST00000136179; ENSMUST00000136704; ENSMUST00000139451; ENSMUST00000153317; BC037049; NM_026430.3; OTTMUST00000075193; OTTMUST00000075194; OTTMUST00000075195; OTTMUST00000075196; OTTMUST00000075197; OTTMUST00000075198; OTTMUST00000075199; OTTMUST00000075200; uc007avq.1; uc011wka.1	TC0100002266.mm.1	1112.82	929.3	910.175	849.223	1884.54	1675.06	364.557	1499.22	UDP-glucuronate decarboxylase 1	Multiple_Complex
Mettl21c	NM_001013799; ENSMUST00000061421; ENSMUST00000159881; ENSMUST00000162750; BC147328; BC147329; NM_001013799.1; OTTMUST00000065797; OTTMUST00000065798; OTTMUST00000065799; uc007avv.1; uc007avw.1	TC0100002269.mm.1	20.5348	20.2521	21.8566	21.8566	24.2515	24.2515	30.0647	22.9433	methyltransferase like 21C	Multiple_Complex
Tex30	NM_029368; ENSMUST00000027215; ENSMUST00000125540; ENSMUST00000127923; ENSMUST00000128190; ENSMUST00000129702; ENSMUST00000133677; ENSMUST00000143327; ENSMUST00000147571; ENSMUST00000147661; ENSMUST00000149502; ENSMUST00000150911; ENSMUST00000152239; ENSMUST00000156392; BC099557; BC116881; BC119032; NM_029368.1; OTTMUST00000085988; OTTMUST00000085989; OTTMUST00000085990; OTTMUST00000085991; OTTMU…	TC0100003876.mm.1	826.001	820.296	809.002	719.076	342.509	396.177	608.874	1184.45	testis expressed 30	Multiple_Complex
Kdelc1	NM_023645; ENSMUST00000027213; ENSMUST00000065767; ENSMUST00000141125; ENSMUST00000149665; ENSMUST00000152643; BC023141; NM_023645.3; OTTMUST00000085981; OTTMUST00000085982; OTTMUST00000085983; OTTMUST00000085985; OTTMUST00000086001; uc007awb.1; uc007awc.1; uc011wkc.1	TC0100003877.mm.1	50.9143	57.68	42.2243	41.9326	78.7932	47.1766	265.028	131.599	KDEL (Lys-Asp-Glu-Leu) containing 1	Multiple_Complex
Mettl21e	NM_207281; ENSMUST00000054801; ENSMUST00000150062; BC100531; NM_207281.3; OTTMUST00000065801; OTTMUST00000065802; uc007awk.1	TC0100002274.mm.1	20.8215	21.259	20.8215	23.2636	31.125	28.2465	32.2226	24.761	methyltransferase like 21E	Multiple_Complex
Col5a2	NM_007737; ENSMUST00000086430; ENSMUST00000131535; ENSMUST00000134681; ENSMUST00000150143; BC055077; NM_007737.2; OTTMUST00000050640; OTTMUST00000050641; OTTMUST00000050642; OTTMUST00000050643; uc007awr.1; uc007aws.1	TC0100002278.mm.1	21.7057	22.3159	21.8566	22.7848	27.4741	27.4741	29.8571	24.761	collagen, type V, alpha 2	Multiple_Complex
Gm5269	ENSMUST00000183590; ENSMUST00000184038	TC0100002284.mm.1	119.428	156.498	100.427	105.42	60.1295	34.2968	89.2636	97.6806	predicted gene 5269 [Source:MGI Symbol;Acc:MGI:3646793]	Multiple_Complex
Slc40a1	NM_016917; ENSMUST00000027137; BC003438; NM_016917.2; uc007awu.1; uc007awv.1; uc011wkh.1; uc011wki.1	TC0100002285.mm.1	122.786	249	81.0084	78.7932	67.6492	77.1717	233.941	186.108	solute carrier family 40 (iron-regulated transporter), member 1	Multiple_Complex
Gm3852	ENSMUST00000169792; NM_001177356.1; uc011wkj.1	TC0100002286.mm.1	290.018	300.246	276.282	227.544	477.713	252.476	342.509	487.751	predicted gene 3852; SubName: Full=MCG1031563; SubName: Full=Uncharacterized protein;	Multiple_Complex
Stk-ps2	NR_037690; NR_037691; BC145241; BC145242; BC150733	TC0100002287.mm.1	11.7127	11.8762	13.3614	13.4543	20.8215	16.2234	19.2929	13.0864	serine/threonine kinase 2	Multiple_Complex
Slc39a10	NM_172653; ENSMUST00000027131; ENSMUST00000141226; BC052880; BC062918; NM_172653.2; OTTMUST00000050811; OTTMUST00000050812; uc007axc.1; uc007axd.1	TC0100002288.mm.1	16046.8	15500.2	12854.6	10660.6	13682.1	7912.95	21769.2	30786.3	solute carrier family 39 (zinc transporter), member 10	Multiple_Complex
Nabp1	NM_028696; ENSMUST00000027279; BC095967; BC131923; BC132532; NM_028696.3; uc007axm.1; uc007axn.1; uc007axo.1; uc007axp.1	TC0100002305.mm.1	11505.2	10297.5	8779.97	7181.15	1251.98	1152.06	3444.31	5914.33	nucleic acid binding protein 1	Multiple_Complex
Myo1b	NM_001161817; NM_010863; ENSMUST00000018561; ENSMUST00000046390; ENSMUST00000114537; ENSMUST00000114541; ENSMUST00000123299; ENSMUST00000126657; ENSMUST00000126952; ENSMUST00000135125; ENSMUST00000136273; ENSMUST00000136701; ENSMUST00000140731; ENSMUST00000140930; ENSMUST00000144694; ENSMUST00000145367; ENSMUST00000151525; BC046300; BC054786; NM_001161817.1; NM_010863.3; OTTMUST00000039699; OTTMU…	TC0100002308.mm.1	776.047	797.865	729.114	694.581	227.544	184.823	407.315	487.751	myosin IB	Multiple_Complex
Gls	NM_001081081; NM_001113383; ENSMUST00000114509; ENSMUST00000114510; ENSMUST00000114512; ENSMUST00000114513; ENSMUST00000123324; ENSMUST00000126221; ENSMUST00000129107; ENSMUST00000136654; ENSMUST00000138906; ENSMUST00000139273; ENSMUST00000142976; ENSMUST00000145514; ENSMUST00000147825; ENSMUST00000148917; ENSMUST00000151694; ENSMUST00000155587; ENSMUST00000156887; NM_001081081.2; NM_001113383.1;…	TC0100002314.mm.1	418.766	401.707	340.144	328.557	254.232	237.207	393.44	335.461	glutaminase	Multiple_Complex
Nab1	NM_008667; ENSMUST00000069792; ENSMUST00000164747; ENSMUST00000167732; ENSMUST00000168082; ENSMUST00000170269; BC005627; BC016886; NM_008667.3; OTTMUST00000092056; OTTMUST00000092057; OTTMUST00000092058; OTTMUST00000092059; OTTMUST00000092060; uc007ayh.2	TC0100002319.mm.1	374.806	374.806	328.557	347.291	580.037	451.944	544.958	451.944	Ngfi-A binding protein 1	Multiple_Complex
Mfsd6	NM_133829; NM_178081; ENSMUST00000087701; ENSMUST00000147421; ENSMUST00000147758; ENSMUST00000149887; ENSMUST00000156876; BC017534; NM_133829.2; NM_178081.4; OTTMUST00000083797; OTTMUST00000083798; OTTMUST00000083799; OTTMUST00000083800; OTTMUST00000083801; uc007ayl.3; uc007aym.1; uc007ayn.1	TC0100002324.mm.1	477.713	494.559	388.023	354.588	634.73	436.549	240.518	897.644	major facilitator superfamily domain containing 6	Multiple_Complex
Inpp1	NM_008384; ENSMUST00000027271; ENSMUST00000159607; ENSMUST00000159725; ENSMUST00000162351; ENSMUST00000162576; ENSMUST00000177279; BC025072; NM_008384.2; OTTMUST00000065807; OTTMUST00000065808; OTTMUST00000065809; OTTMUST00000065810; OTTMUST00000065811; OTTMUST00000111209; uc007ayo.2	TC0100002327.mm.1	36.7583	37.2715	44.9422	41.6429	41.3553	44.0173	41.0696	37.014	inositol polyphosphate-1-phosphatase	Multiple_Complex
Gm16107	ENSMUST00000162523	TC0100002329.mm.1	20.8215	22.4711	28.0514	21.259	29.6508	28.0514	43.7133	24.0839	predicted gene 16107 [Source:MGI Symbol;Acc:MGI:3801820]	Multiple_Complex
1700019D03Rik	NM_144953; ENSMUST00000050567; ENSMUST00000114492; ENSMUST00000114493; BC048645; NM_144953.2; uc007ayr.1; uc007ays.1	TC0100002330.mm.1	58.0812	64.4452	50.9143	64.4452	79.8932	67.1819	222.861	103.25	RIKEN cDNA 1700019D03 gene	Multiple_Complex
Pms1	NM_153556; ENSMUST00000027267; ENSMUST00000126412; ENSMUST00000126590; ENSMUST00000128337; ENSMUST00000133358; ENSMUST00000135246; ENSMUST00000142922; BC028939; NM_153556.1; OTTMUST00000051984; OTTMUST00000052021; OTTMUST00000052022; OTTMUST00000052023; OTTMUST00000052024; OTTMUST00000052025; OTTMUST00000052026; uc007ayv.2; uc007ayx.1	TC0100002332.mm.1	89.8845	82.7106	82.7106	76.6386	75.0614	84.4485	508.463	72.5046	postmeiotic segregation increased 1 (S. cerevisiae)	Multiple_Complex
Asnsd1	NM_133728; ENSMUST00000027264; ENSMUST00000123519; ENSMUST00000136468; ENSMUST00000147021; ENSMUST00000154402; BC013617; NM_133728.2; OTTMUST00000051332; OTTMUST00000051333; OTTMUST00000051334; OTTMUST00000051335; OTTMUST00000051336; uc007azf.1	TC0100002333.mm.1	206.5	232.325	192.672	167.73	270.597	284.05	541.193	390.722	asparagine synthetase domain containing 1	Multiple_Complex
Dnah7a	NM_001252070; ENSMUST00000094964; NM_001252070.1; uc007azi.1; uc029qom.1	TC0100002335.mm.1	98.36	101.125	92.4115	89.2636	128.89	112.206	198.088	131.599	dynein, axonemal, heavy chain 7A	Multiple_Complex
Stk17b	NM_133810; ENSMUST00000027263; BC006579; NM_133810.3; OTTMUST00000050819; uc007azj.2	TC0100002337.mm.1	218.275	196.72	215.269	229.126	179.769	252.476	249	159.786	serine/threonine kinase 17b (apoptosis-inducing)	Multiple_Complex
Hecw2	NM_001001883; NM_172655; ENSMUST00000087659; ENSMUST00000097741; ENSMUST00000120904; ENSMUST00000146850; ENSMUST00000150677; ENSMUST00000152870; NM_001001883.3; NM_172655.3; OTTMUST00000072479; OTTMUST00000072480; OTTMUST00000072493; OTTMUST00000072494; uc007azk.2; uc007azl.2; uc007azm.1; uc011wkw.2	TC0100002338.mm.1	53.4456	49.18	48.8403	47.1766	49.8665	48.8403	48.8403	53.4456	HECT, C2 and WW domain containing E3 ubiquitin protein ligase 2	Multiple_Complex
Pgap1	NM_001163314; ENSMUST00000097739; NM_001163314.2; uc007azr.3; uc011wky.2	TC0100002349.mm.1	118.603	143.013	81.0084	84.4485	128.89	109.896	51.6251	237.207	post-GPI attachment to proteins 1	Multiple_Complex
Ankrd44	NM_001081433; ENSMUST00000044359; ENSMUST00000177679; ENSMUST00000177704; ENSMUST00000177919; ENSMUST00000178156; ENSMUST00000178226; ENSMUST00000178685; ENSMUST00000178905; ENSMUST00000178935; ENSMUST00000179030; ENSMUST00000179242; ENSMUST00000179398; ENSMUST00000180189; ENSMUST00000180327; BC157918; BC157951; BC172102; NM_001081433.3; OTTMUST00000111387; OTTMUST00000111388; OTTMUST00000111389;…	TC0100002350.mm.1	2320.15	2469.49	1833.01	1552.09	3169.41	2759.13	3019.3	3902.01	ankyrin repeat domain 44	Multiple_Complex
Sf3b1	NM_031179; ENSMUST00000027127; NM_031179.2; uc007azw.2; uc007azx.2; uc007azy.1	TC0100002353.mm.1	5955.47	6295.04	5712.87	5042.77	2019.8	1629.26	3281.18	3743.05	splicing factor 3b, subunit 1	Multiple_Complex
Rftn2	NM_028713; ENSMUST00000027121; ENSMUST00000114428; ENSMUST00000132055; ENSMUST00000133294; ENSMUST00000141107; BC026871; BC038341; NM_028713.1; OTTMUST00000051756; OTTMUST00000051757; OTTMUST00000051758; OTTMUST00000051759; OTTMUST00000051760; uc007bag.1; uc007bah.1; uc011wla.1	TC0100002356.mm.1	28.0514	26.5382	30.6965	33.1285	29.2426	32.6724	33.1285	33.8246	raftlin family member 2	Multiple_Complex
Boll	NM_001113367; NM_029267; ENSMUST00000087585; ENSMUST00000114423; ENSMUST00000159398; ENSMUST00000159564; ENSMUST00000161472; ENSMUST00000161810; ENSMUST00000173983; ENSMUST00000174065; NM_001113367.1; NM_029267.3; OTTMUST00000074608; OTTMUST00000074609; OTTMUST00000074610; OTTMUST00000074813; OTTMUST00000077676; OTTMUST00000095998; OTTMUST00000096025; uc007bal.1; uc007bam.1; uc011wlb.1	TC0100002357.mm.1	24.761	23.2636	23.7524	22.7848	27.6652	27.0958	29.0406	24.0839	bol, boule-like (Drosophila)	Multiple_Complex
Satb2	NM_139146; ENSMUST00000042857; ENSMUST00000114415; ENSMUST00000176759; ENSMUST00000177282; ENSMUST00000177424; BC138625; BC138626; NM_139146.2; OTTMUST00000055482; OTTMUST00000055483; OTTMUST00000104375; OTTMUST00000104376; OTTMUST00000104377; uc007bas.1; uc011wlc.1	TC0100002365.mm.1	544.958	568.1	461.44	439.586	903.888	639.145	855.13	1024	special AT-rich sequence binding protein 2	Multiple_Complex
Tyw5	NM_001037742; NM_001114102; NR_004860; ENSMUST00000079998; ENSMUST00000097732; ENSMUST00000160118; ENSMUST00000160837; ENSMUST00000161092; ENSMUST00000161727; ENSMUST00000161780; ENSMUST00000162663; ENSMUST00000162686; ENSMUST00000163039; BC132289; NM_001037742.2; NM_001114102.1; NR_004860.1; OTTMUST00000073855; OTTMUST00000073912; OTTMUST00000073913; OTTMUST00000073914; OTTMUST00000073916; OTTMU…	TC0100002371.mm.1	110.661	117.784	112.986	116.162	68.5935	57.2816	76.1093	164.279	tRNA-yW synthesizing protein 5; tRNA-yW synthesizing protein 5 (Tyw5), transcript variant 2, mRNA.; tRNA-yW synthesizing protein 5 (Tyw5), transcript variant 3, long non-coding RNA.	Multiple_Complex
Kctd18	NM_001159864; NM_001159865; NR_027630; ENSMUST00000068000; ENSMUST00000114410; ENSMUST00000159826; ENSMUST00000160130; ENSMUST00000160614; ENSMUST00000161608; ENSMUST00000162410; ENSMUST00000163006; ENSMUST00000163061; ENSMUST00000164963; BC075692; NM_001159864.1; NM_001159865.1; NR_027630.1; OTTMUST00000089405; OTTMUST00000089406; OTTMUST00000089407; OTTMUST00000089408; OTTMUST00000089409; OTTMU…	TC0100002376.mm.1	149.086	139.102	130.69	139.102	80.4489	91.7731	115.36	144.007	potassium channel tetramerisation domain containing 18	Multiple_Complex
Clk1	NM_001042634; NR_027853; NR_027854; ENSMUST00000034868; ENSMUST00000123580; ENSMUST00000129303; ENSMUST00000129577; ENSMUST00000131051; ENSMUST00000135380; ENSMUST00000139787; ENSMUST00000141570; ENSMUST00000147258; ENSMUST00000148330; ENSMUST00000151338; ENSMUST00000156931; BC160357; NM_001042634.2; NR_027853.1; NR_027854.1; OTTMUST00000051743; OTTMUST00000051744; OTTMUST00000051745; OTTMUST0000…	TC0100002381.mm.1	608.874	639.145	556.408	526.394	157.586	149.086	491.143	526.394	CDC-like kinase 1; Synthetic construct Mus musculus clone IMAGE:100064101, MGC:193472 CDC-like kinase 1 (Clk1) mRNA, encodes complete protein.; CDC-like kinase 1 (Clk1), transcript variant 2, non-coding RNA.	Multiple_Complex
Ppil3	NM_001285826; NM_001285827; NM_027351; NM_027374; ENSMUST00000081677; ENSMUST00000114345; ENSMUST00000114348; ENSMUST00000117069; ENSMUST00000124550; BC060993; BC061645; NM_027351.3; NM_027374.3; OTTMUST00000052203; OTTMUST00000052204; OTTMUST00000052205; OTTMUST00000052206; OTTMUST00000052207; uc007bbw.2; uc007bbv.2; uc007bbx.2; uc007bby.2	TC0100002382.mm.1	73.5167	76.1093	77.7085	75.5835	57.2816	71.5064	53.8174	114.563	peptidylprolyl isomerase (cyclophilin)-like 3	Multiple_Complex
Orc2	NM_001025378; NM_001271526; NM_008765; ENSMUST00000027198; ENSMUST00000114325; ENSMUST00000151723; BC015257; NM_001025378.1; NM_008765.2; OTTMUST00000052154; OTTMUST00000052155; OTTMUST00000052156; uc007bcd.1; uc007bce.1; uc007bcc.1	TC0100002383.mm.1	5752.61	5634.22	5148.73	4608.24	4096	3304	6208.38	4803.93	origin recognition complex, subunit 2; origin recognition complex, subunit 2 (Orc2), transcript variant a, mRNA.	Multiple_Complex
Fam126b	NM_172513; ENSMUST00000038372; ENSMUST00000097724; ENSMUST00000159185; ENSMUST00000159980; ENSMUST00000160546; ENSMUST00000161000; ENSMUST00000161600; BC068302; NM_172513.3; OTTMUST00000065877; OTTMUST00000065878; OTTMUST00000065879; OTTMUST00000065880; OTTMUST00000065881; OTTMUST00000065882; OTTMUST00000065883; uc007bch.2; uc007bci.2; uc007bcj.2	TC0100002385.mm.1	3304	3516.68	2435.5	2452.44	7033.37	5256.91	6427.31	4737.79	family with sequence similarity 126, member B	Multiple_Complex
Trak2	NM_172406; ENSMUST00000027186; ENSMUST00000172685; ENSMUST00000173590; ENSMUST00000173719; ENSMUST00000174120; ENSMUST00000174359; BC060681; NM_172406.3; OTTMUST00000097369; OTTMUST00000097370; OTTMUST00000097371; OTTMUST00000097372; OTTMUST00000097373; OTTMUST00000097376; uc007bcv.2	TC0100002392.mm.1	885.286	849.223	630.346	617.374	544.958	439.586	1120.56	776.047	trafficking protein, kinesin binding 2	Multiple_Complex
Als2cr11	NM_175200; ENSMUST00000097080; ENSMUST00000149784; BC118929; NM_175200.4; OTTMUST00000055877; OTTMUST00000055878; uc007bdc.1; uc011wln.1	TC0100002394.mm.1	24.59	26.5382	27.0958	29.8571	31.5594	35.0174	46.5271	28.2465	amyotrophic lateral sclerosis 2 (juvenile) chromosome region, candidate 11 (human)	Multiple_Complex
Mpp4	NM_145143; ENSMUST00000066374; ENSMUST00000078874; BC061694; BC116723; NM_145143.3; uc007bdh.1; uc007bdi.2; uc007bdj.1; uc007bdk.2; uc011wlo.1	TC0100003878.mm.1	73.5167	62.6829	66.7178	60.9688	60.9688	68.5935	56.8859	55.3304	membrane protein, palmitoylated 4 (MAGUK p55 subfamily member 4)	Multiple_Complex
Als2	NM_001159948; NM_028717; NM_146109; ENSMUST00000027178; ENSMUST00000159166; ENSMUST00000160945; ENSMUST00000163058; BC031479; BC046828; NM_001159948.2; NM_028717.6; NM_146109.3; OTTMUST00000051627; OTTMUST00000051628; OTTMUST00000051629; OTTMUST00000088324; uc007bdl.2; uc007bdm.2; uc007bdn.2; uc011wlp.1	TC0100003879.mm.1	1144.1	1360.57	1418.35	1144.1	464.65	349.706	666.287	576.03	amyotrophic lateral sclerosis 2 (juvenile)	Multiple_Complex
Sumo1	NM_009460; ENSMUST00000091374; ENSMUST00000123857; BC082566; BC083158; NM_009460.2; OTTMUST00000052620; OTTMUST00000052621; uc007bdx.1	TC0100002405.mm.1	8422.31	8659.09	8779.97	8719.32	1871.53	1595.73	8079.22	8964.45	small ubiquitin-like modifier 1; SMT3 suppressor of mif two 3 homolog 1 (yeast)	Multiple_Complex
Wdr12	NM_001199060; NM_001199061; NM_021312; ENSMUST00000027173; ENSMUST00000117438; ENSMUST00000122038; ENSMUST00000133767; ENSMUST00000136461; ENSMUST00000141417; ENSMUST00000143342; ENSMUST00000147413; BC004748; BC052386; BC096651; NM_001199060.1; NM_001199061.1; NM_021312.5; OTTMUST00000051272; OTTMUST00000051273; OTTMUST00000051274; OTTMUST00000051275; OTTMUST00000051276; OTTMUST00000051277; OTTMU…	TC0100002411.mm.1	1260.69	1160.07	1152.06	968.763	143.013	172.446	675.588	608.874	WD repeat domain 12	Multiple_Complex
Raph1	NM_001045513; ENSMUST00000027168; ENSMUST00000090293; ENSMUST00000127573; ENSMUST00000140485; ENSMUST00000142258; ENSMUST00000182085; NM_001045513.3; OTTMUST00000004432; OTTMUST00000004475; OTTMUST00000004476; OTTMUST00000004477; OTTMUST00000113093; uc007bet.2	TC0100002413.mm.1	139.102	152.219	121.938	131.599	230.72	151.167	178.527	164.279	Ras association (RalGDS/AF-6) and pleckstrin homology domains 1	Multiple_Complex
Gm11575	XM_001479482.2	TC0100002417.mm.1	1468.37	1269.46	1758.34	1746.2	2778.33	1951	2538.92	2225.63	predicted gene 11575	Multiple_Complex
Gm11582	ENSMUST00000121041	TC0100002426.mm.1	148.056	148.056	131.599	222.861	109.137	118.603	114.563	112.206	predicted gene 11582 [Source:MGI Symbol;Acc:MGI:3652084]	Multiple_Complex
Gm11590	ENSMUST00000118999	TC0100002428.mm.1	13.737	12.9063	14.1232	19.2929	17.8766	34.7755	20.2521	16.5642	predicted gene 11590 [Source:MGI Symbol;Acc:MGI:3652106]	Multiple_Complex
Gm11591	ENSMUST00000120063	TC0100002429.mm.1	42.5179	39.3966	60.5477	44.0173	71.5064	72.0037	66.257	52.3457	predicted gene 11591 [Source:MGI Symbol;Acc:MGI:3652105]	Multiple_Complex
Gm11600	ENSMUST00000119592	TC0100002435.mm.1	30.0647	24.761	45.2548	55.7152	39.9466	62.2499	73.0089	26.9087	predicted gene 11600 [Source:MGI Symbol;Acc:MGI:3651838]	Multiple_Complex
Ino80d	NM_001081436; NM_001114609; ENSMUST00000097718; ENSMUST00000133236; ENSMUST00000137511; ENSMUST00000153992; ENSMUST00000165066; ENSMUST00000172416; BC150989; NM_001081436.2; NM_001114609.1; OTTMUST00000005042; OTTMUST00000005043; OTTMUST00000005044; OTTMUST00000005045; uc007bfq.2; uc011wmb.1; uc011wmc.1	TC0100002442.mm.1	1144.1	1089.92	1082.39	1089.92	1128.35	910.175	670.921	861.078	INO80 complex subunit D; INO80 complex subunit D (Ino80d), transcript variant 2, mRNA.	Multiple_Complex
Ndufs1	NM_001160038; NM_001160039; NM_001160040; NM_145518; ENSMUST00000027111; ENSMUST00000140612; ENSMUST00000168099; BC006660; BC015300; NM_001160038.1; NM_001160039.1; NM_001160040.1; NM_145518.2; OTTMUST00000005068; OTTMUST00000005069; uc007bfu.2; uc007bfv.2; uc007bfw.1; uc007bfx.2; uc007bfy.2; uc011wmd.1	TC0100002445.mm.1	126.238	124.5	95.0095	91.7731	48.5029	51.9842	52.3457	122.786	NADH dehydrogenase (ubiquinone) Fe-S protein 1	Multiple_Complex
Gm11606	ENSMUST00000120706	TC0100002452.mm.1	27.0958	22.7848	31.3414	33.5909	39.9466	82.7106	56.8859	28.84	predicted gene 11606 [Source:MGI Symbol;Acc:MGI:3649658]	Multiple_Complex
Dytn	NM_001081658; ENSMUST00000090313; ENSMUST00000126954; NM_001081658.1; OTTMUST00000018790; OTTMUST00000081080; uc007bgi.1	TC0100002456.mm.1	19.4271	19.4271	20.8215	21.8566	28.0514	31.5594	37.014	26.1729	dystrotelin	Multiple_Complex
Klf7	NM_033563; ENSMUST00000055001; ENSMUST00000114086; ENSMUST00000135075; ENSMUST00000142009; BC004700; BC019604; BC040794; NM_033563.2; OTTMUST00000033149; OTTMUST00000033150; OTTMUST00000033151; uc007bgo.2; uc007bgp.2; uc007bgq.1	TC0100002461.mm.1	219.793	263.197	103.968	105.42	359.538	235.568	252.476	564.175	Kruppel-like factor 7 (ubiquitous)	Multiple_Complex
Mettl21a	NM_025964; ENSMUST00000053469; ENSMUST00000114079; ENSMUST00000161264; ENSMUST00000162806; BC026952; NM_025964.3; OTTMUST00000065884; OTTMUST00000065885; OTTMUST00000065886; OTTMUST00000065887; uc007bgu.1; uc007bgv.1	TC0100002468.mm.1	27.8576	29.2426	30.2738	31.779	32.6724	37.2715	34.5353	25.1067	methyltransferase like 21A	Multiple_Complex
Plekhm3	NM_001039493; ENSMUST00000097713; ENSMUST00000123225; ENSMUST00000134097; ENSMUST00000139649; ENSMUST00000140857; NM_001039493.1; OTTMUST00000052216; OTTMUST00000052217; OTTMUST00000052218; OTTMUST00000052219; OTTMUST00000052220; uc007bha.1; uc007bhb.1	TC0100002471.mm.1	526.394	537.455	580.037	451.944	120.259	109.896	212.306	163.144	pleckstrin homology domain containing, family M, member 3	Multiple_Complex
Akr1cl	NM_027582; ENSMUST00000069142; ENSMUST00000159566; ENSMUST00000159896; ENSMUST00000160283; ENSMUST00000161313; ENSMUST00000162800; BC051128; NM_027582.3; OTTMUST00000075187; OTTMUST00000075188; OTTMUST00000075189; OTTMUST00000075190; OTTMUST00000075191; OTTMUST00000077504; uc007bhc.1; uc007bhd.1; uc007bhe.2	TC0100002475.mm.1	131.599	588.134	86.2229	86.8227	70.0348	55.7152	196.72	843.357	aldo-keto reductase family 1, member C-like	Multiple_Complex
Crygd	NM_007776; ENSMUST00000045028; ENSMUST00000127762; ENSMUST00000146122; BC057013; BC132116; BC132118; NM_007776.2; OTTMUST00000083888; OTTMUST00000083889; OTTMUST00000083890; uc007bhg.2	TC0100002477.mm.1	41.0696	39.3966	44.6318	42.5179	63.1189	51.9842	59.7141	43.4113	crystallin, gamma D	Multiple_Complex
Cryga	NM_007774; ENSMUST00000061497; ENSMUST00000154012; BC056430; NM_007774.3; OTTMUST00000052487; OTTMUST00000052488; uc007bhk.1	TC0100003880.mm.1	16.4498	15.3482	17.6305	16.5642	23.7524	19.1597	23.2636	16.4498	crystallin, gamma A	Multiple_Complex
Gm8809	ENSMUST00000119367	TC0100002484.mm.1	50.9143	41.3553	41.9326	42.2243	24.2515	23.4254	34.2968	31.3414	predicted gene 8809 [Source:MGI Symbol;Acc:MGI:3645410]	Multiple_Complex
Kansl1l	NM_001122738; NM_177645; ENSMUST00000068168; ENSMUST00000113987; ENSMUST00000129190; ENSMUST00000132960; BC141036; NM_001122738.1; NM_177645.4; OTTMUST00000061560; OTTMUST00000064847; OTTMUST00000064848; OTTMUST00000079240; uc007bim.2; uc007bin.2; uc007bio.2; uc007bip.1; uc007biq.2; uc011wml.1	TC0100002488.mm.1	157.586	171.255	165.421	172.446	433.534	354.588	342.509	263.197	KAT8 regulatory NSL complex subunit 1-like	Multiple_Complex
Acadl	NM_007381; ENSMUST00000027153; ENSMUST00000139208; BC027412; NM_007381.3; OTTMUST00000064849; OTTMUST00000064850; uc007bir.1	TC0100002495.mm.1	77.7085	96.3358	86.2229	91.7731	62.2499	56.1028	62.2499	118.603	acyl-Coenzyme A dehydrogenase, long-chain	Multiple_Complex
Myl1	NM_001113387; NM_021285; ENSMUST00000027151; ENSMUST00000119429; ENSMUST00000120415; ENSMUST00000150542; ENSMUST00000151328; ENSMUST00000160100; BC059087; NM_001113387.1; NM_021285.3; OTTMUST00000064902; OTTMUST00000064973; OTTMUST00000064974; OTTMUST00000065668; OTTMUST00000086535; OTTMUST00000086536; uc007bis.2; uc007bit.2; uc007biu.2	TC0100002497.mm.1	33.3589	33.5909	38.0546	38.3193	44.3235	52.3457	41.6429	55.3304	myosin, light polypeptide 1	Multiple_Complex
Lancl1	NM_001190984; NM_001190985; NM_021295; ENSMUST00000027149; ENSMUST00000113979; ENSMUST00000119559; ENSMUST00000133508; ENSMUST00000149996; BC058560; NM_001190984.1; NM_001190985.1; NM_021295.3; OTTMUST00000051236; OTTMUST00000051237; OTTMUST00000065662; OTTMUST00000065663; OTTMUST00000065664; uc007biv.1; uc007biw.2; uc007bix.2; uc011wmm.1	TC0100002499.mm.1	183.546	173.645	134.364	125.366	205.074	186.108	393.44	319.573	LanC (bacterial lantibiotic synthetase component C)-like 1	Multiple_Complex
Erbb4	NM_010154; ENSMUST00000119142; ENSMUST00000121473; ENSMUST00000126682; ENSMUST00000131148; ENSMUST00000153432; NM_010154.1; OTTMUST00000061851; OTTMUST00000061852; OTTMUST00000061853; OTTMUST00000061854; OTTMUST00000061855; uc007bjb.1; uc007bjc.1	TC0100002503.mm.1	29.8571	26.7228	26.7228	29.0406	35.5062	38.0546	34.2968	27.2843	v-erb-a erythroblastic leukemia viral oncogene homolog 4 (avian)	Multiple_Complex
Gm15670	ENSMUST00000117740	TC0100002509.mm.1	20.9663	24.59	24.4201	25.2813	19.9733	32.8996	36.2523	23.5883	predicted gene 15670 [Source:MGI Symbol;Acc:MGI:3783112]	Multiple_Complex
Gm8840	ENSMUST00000122454	TC0100002531.mm.1	1168.14	1105.13	962.071	1217.75	173.645	128	776.047	734.185	predicted gene 8840 [Source:MGI Symbol;Acc:MGI:3647579]	Multiple_Complex
Ikzf2	NM_011770; ENSMUST00000027146; BC138606; BC138608; NM_011770.4; uc007bjd.2; uc029qoy.1	TC0100002534.mm.1	48.5029	44.6318	38.8542	35.7532	58.4852	57.68	43.7133	65.7993	IKAROS family zinc finger 2	Multiple_Complex
Bard1	NM_007525; ENSMUST00000027393; BC128370; BC128371; NM_007525.3; OTTMUST00000076570; uc007bjm.2	TC0100002541.mm.1	122.786	126.238	84.4485	82.7106	73.0089	63.5579	56.493	74.028	BRCA1 associated RING domain 1	Multiple_Complex
Gm16236	ENSMUST00000159588	TC0100002542.mm.1	18.1261	19.0273	12.8171	16.9123	19.2929	19.1597	21.259	17.7531	predicted gene 16236 [Source:MGI Symbol;Acc:MGI:3801868]	Multiple_Complex
Abca12	NM_175210; ENSMUST00000087268; BC158053; BC158063; NM_175210.3; uc007bjo.2; uc007bjp.1; uc007bjq.1; uc011wmq.1	TC0100002543.mm.1	25.1067	24.59	25.2813	26.3549	33.5909	39.9466	30.2738	33.3589	ATP-binding cassette, sub-family A (ABC1), member 12	Multiple_Complex
March4	NM_001045533; ENSMUST00000047786; BC098191; NM_001045533.1; OTTMUST00000065971; uc007bkn.1	TC0100002556.mm.1	36.7583	36.5044	39.3966	34.2968	38.8542	45.2548	47.8352	48.5029	membrane-associated ring finger (C3HC4) 4	Multiple_Complex
Igfbp5	NM_010518; ENSMUST00000027377; ENSMUST00000137339; BC054812; BC057447; NM_010518.2; OTTMUST00000042008; OTTMUST00000042009; uc007bkx.1	TC0100002562.mm.1	29.446	73.0089	49.5221	37.7918	44.6318	45.5696	61.3929	48.1679	insulin-like growth factor binding protein 5	Multiple_Complex
Tns1	NM_001289895; NM_027884; ENSMUST00000169786; NM_027884.3; uc007blg.2; uc011wmx.1; uc007blf.2; uc007bli.1	TC0100002576.mm.1	24.9333	28.443	27.4741	27.8576	32	35.7532	29.446	26.9087	tensin 1; tensin 1 (Tns1), mRNA.	Multiple_Complex
Tmbim1	NM_027154; ENSMUST00000016309; ENSMUST00000113796; ENSMUST00000128505; ENSMUST00000130763; ENSMUST00000135384; ENSMUST00000141560; ENSMUST00000152603; ENSMUST00000154859; BC004752; NM_027154.5; OTTMUST00000051568; OTTMUST00000051569; OTTMUST00000051570; OTTMUST00000051571; OTTMUST00000051572; OTTMUST00000051573; OTTMUST00000051574; OTTMUST00000051575; uc007blv.2	TC0100002583.mm.1	377.413	359.538	308.687	292.036	430.539	328.557	714.109	639.145	transmembrane BAX inhibitor motif containing 1	Multiple_Complex
Usp37	NM_176972; ENSMUST00000044260; BC139091; NM_176972.4; uc007bmc.2; uc007bmd.2; uc007bme.1	TC0100002584.mm.1	5712.87	5712.87	5042.77	4640.29	3666.02	2628.46	3743.05	3691.52	ubiquitin specific peptidase 37	Multiple_Complex
Zfp142	NM_029888; ENSMUST00000027315; ENSMUST00000066986; ENSMUST00000113737; ENSMUST00000127921; ENSMUST00000130112; ENSMUST00000136865; ENSMUST00000147011; ENSMUST00000156613; BC060118; NM_029888.2; OTTMUST00000051589; OTTMUST00000051590; OTTMUST00000051591; OTTMUST00000051592; OTTMUST00000051593; OTTMUST00000051594; OTTMUST00000051595; OTTMUST00000051596; uc007bml.1; uc007bmm.1; uc007bmn.1; uc007bmo.…	TC0100002586.mm.1	568.1	537.455	501.463	455.087	455.087	382.681	298.172	564.175	zinc finger protein 142	Multiple_Complex
Rnf25	NM_021313; ENSMUST00000027357; ENSMUST00000113721; ENSMUST00000127938; ENSMUST00000128491; ENSMUST00000132081; ENSMUST00000135140; ENSMUST00000136078; ENSMUST00000149649; ENSMUST00000151003; ENSMUST00000154874; BC048821; NM_021313.2; OTTMUST00000051604; OTTMUST00000051605; OTTMUST00000051606; OTTMUST00000051607; OTTMUST00000051608; OTTMUST00000051609; OTTMUST00000051610; OTTMUST00000051611; OTTMU…	TC0100002588.mm.1	292.036	317.365	328.557	357.054	270.597	347.291	170.072	261.379	ring finger protein 25	Multiple_Complex
Fev	NM_153111; ENSMUST00000068631; ENSMUST00000159232; ENSMUST00000162938; BC138435; BC138436; NM_153111.2; OTTMUST00000088326; OTTMUST00000088327; OTTMUST00000088328; uc007bnh.2; uc011wnd.1	TC0100002593.mm.1	15.8895	15.1369	21.8566	18.0009	30.0647	31.5594	18.8959	14.723	FEV (ETS oncogene family)	Multiple_Complex
Cryba2	NM_021541; ENSMUST00000006721; ENSMUST00000133833; BC052746; BC056989; NM_021541.2; OTTMUST00000049279; OTTMUST00000049288; uc007bni.1	TC0100002594.mm.1	12.2101	12.042	11.8762	12.5533	15.0324	14.6213	14.2215	12.3805	crystallin, beta A2	Multiple_Complex
Ccdc108	NM_001039495; ENSMUST00000094844; ENSMUST00000130489; ENSMUST00000139950; BC150939; NM_001039495.1; OTTMUST00000066060; OTTMUST00000066061; OTTMUST00000066062; uc007bnj.1; uc007bnk.1	TC0100002596.mm.1	31.5594	26.3549	29.0406	28.84	33.5909	36.7583	34.7755	26.1729	coiled-coil domain containing 108	Multiple_Complex
Cnppd1	NM_026977; ENSMUST00000041213; ENSMUST00000168720; BC028815; NM_026977.2; uc007bnp.1; uc007bnq.1; uc007bnr.1; uc007bns.1	TC0100002600.mm.1	1052.79	849.223	982.286	1060.11	1910.85	1770.57	284.05	680.287	cyclin Pas1/PHO80 domain containing 1	Multiple_Complex
Abcb6	NM_023732; ENSMUST00000027396; ENSMUST00000159219; ENSMUST00000160081; ENSMUST00000160757; ENSMUST00000161103; ENSMUST00000161215; BC006634; NM_023732.2; OTTMUST00000088204; OTTMUST00000088219; OTTMUST00000088220; OTTMUST00000088221; OTTMUST00000088222; OTTMUST00000088223; uc007bnx.1	TC0100002601.mm.1	115.36	112.986	105.42	111.43	112.986	109.137	62.2499	142.025	ATP-binding cassette, sub-family B (MDR/TAP), member 6	Multiple_Complex
Atg9a	NM_001003917; NM_001288612; NM_001288613; NR_109938; ENSMUST00000040689; BC079884; NM_001003917.3; uc007boa.1; uc007bob.1; uc011wnh.1; uc007bnz.1; uc007boc.1	TC0100002602.mm.1	3373.43	2977.74	3492.39	3281.18	401.707	398.932	826.001	849.223	autophagy related 9A; autophagy related 9A (Atg9a), mRNA.	Multiple_Complex
Glb1l	NM_029010; ENSMUST00000113623; ENSMUST00000131408; ENSMUST00000132507; ENSMUST00000143193; ENSMUST00000146713; ENSMUST00000153584; ENSMUST00000155716; BC021773; NM_029010.1; OTTMUST00000051172; OTTMUST00000051173; OTTMUST00000051174; OTTMUST00000051175; OTTMUST00000051176; OTTMUST00000051177; OTTMUST00000051178; uc007bog.1; uc011wnk.1; uc011wnl.1	TC0100002603.mm.1	51.6251	41.0696	44.6318	43.4113	34.0598	40.7859	37.7918	32.2226	galactosidase, beta 1-like	Multiple_Complex
Chpf	NM_001001565; NM_001001566; ENSMUST00000079205; ENSMUST00000094818; ENSMUST00000124042; ENSMUST00000138683; ENSMUST00000143020; ENSMUST00000143496; BC071273; NM_001001565.2; NM_001001566.3; OTTMUST00000046315; OTTMUST00000046316; OTTMUST00000046317; OTTMUST00000046318; OTTMUST00000046319; uc007bph.1; uc007bpi.2; uc007bpj.2; uc007bpk.2	TC0100003882.mm.1	19.8353	21.7057	21.4068	20.8215	28.84	26.1729	24.2515	22.0087	chondroitin polymerizing factor	Multiple_Complex
Obsl1	NM_178884; ENSMUST00000113565; ENSMUST00000113567; ENSMUST00000127507; ENSMUST00000129403; ENSMUST00000132252; ENSMUST00000138352; ENSMUST00000145306; ENSMUST00000145382; ENSMUST00000150293; ENSMUST00000154636; ENSMUST00000155084; ENSMUST00000156705; NM_178884.5; OTTMUST00000041038; OTTMUST00000046324; OTTMUST00000046325; OTTMUST00000046326; OTTMUST00000046327; OTTMUST00000046328; OTTMUST00000046…	TC0100003883.mm.1	23.4254	30.4844	26.1729	26.7228	30.4844	32.4467	30.2738	27.2843	obscurin-like 1	Multiple_Complex
Epha4	NM_007936; ENSMUST00000027451; BC004782; BC052164; NM_007936.3; uc007bpz.1; uc007bqa.1	TC0100002618.mm.1	225.972	215.269	173.645	164.279	335.461	302.334	304.437	809.002	Eph receptor A4	Multiple_Complex
Pax3	NM_001159520; NM_008781; ENSMUST00000004994; ENSMUST00000087086; ENSMUST00000172555; BC048699; NM_001159520.1; NM_008781.4; OTTMUST00000097090; OTTMUST00000097091; OTTMUST00000097092; uc007bqb.2; uc007bqc.2; uc007bqd.1	TC0100002624.mm.1	27.0958	23.7524	22.0087	24.2515	23.2636	28.443	24.4201	19.5622	paired box 3; paired box gene 3	Multiple_Complex
Farsb	NM_001278075; NM_011811; NR_102757; NR_102758; ENSMUST00000068333; ENSMUST00000170217; BC002313; BC016428; NM_011811.3; uc007bqf.1; uc007bqg.1; uc007bqh.1; uc007bqi.1	TC0100002631.mm.1	2336.28	2352.53	1937.53	1820.35	2120.22	2272.4	2435.5	4770.75	phenylalanyl-tRNA synthetase, beta subunit; phenylalanyl-tRNA synthetase, beta subunit (Farsb), mRNA.	Multiple_Complex
Wdfy1	NM_001111279; NM_027057; ENSMUST00000048820; ENSMUST00000113510; ENSMUST00000113511; ENSMUST00000113512; ENSMUST00000113513; ENSMUST00000113514; ENSMUST00000113515; ENSMUST00000125641; ENSMUST00000127771; ENSMUST00000130714; ENSMUST00000138319; ENSMUST00000143368; BC025226; NM_001111279.1; NM_027057.3; OTTMUST00000050848; OTTMUST00000050858; OTTMUST00000050859; OTTMUST00000050860; OTTMUST00000050…	TC0100002644.mm.1	205.074	167.73	265.028	319.573	330.842	252.476	109.896	100.427	WD repeat and FYVE domain containing 1	Multiple_Complex
Serpine2	NM_009255; ENSMUST00000027467; ENSMUST00000153862; BC010675; NM_009255.4; OTTMUST00000051625; OTTMUST00000051626; uc007bqz.2; uc007bra.2	TC0100002645.mm.1	831.746	1606.83	760.076	657.114	714.109	617.374	1045.52	1360.57	serine (or cysteine) peptidase inhibitor, clade E, member 2	Multiple_Complex
Fam124b	NM_173425; ENSMUST00000058748; ENSMUST00000161427; BC150872; NM_173425.3; OTTMUST00000088476; OTTMUST00000088477; uc007brb.2	TC0100002649.mm.1	17.1484	16.5642	18.8959	17.7531	19.5622	26.9087	20.9663	17.6305	family with sequence similarity 124, member B	Multiple_Complex
Cul3	NM_016716; ENSMUST00000163119; ENSMUST00000164108; ENSMUST00000167293; ENSMUST00000167794; ENSMUST00000168372; ENSMUST00000170897; BC027304; NM_016716.4; OTTMUST00000090232; OTTMUST00000090233; OTTMUST00000090234; OTTMUST00000090235; OTTMUST00000090236; OTTMUST00000090237; uc007brc.1; uc007brd.1	TC0100002651.mm.1	3640.7	3590.58	3420.52	2957.17	929.3	797.865	4269.94	3420.52	cullin 3	Multiple_Complex
Dock10	NM_001285927; NM_175291; ENSMUST00000077946; BC150753; NM_175291.3; uc007brg.2; uc007brh.2; uc011wnx.1; uc011wny.1; uc011wnz.1; uc007bre.1; uc007brf.1; uc007bri.2	TC0100002656.mm.1	39.3966	41.0696	40.2244	38.5859	57.2816	51.2685	37.014	49.18	dedicator of cytokinesis 10; dedicator of cytokinesis 10 (Dock10), mRNA.	Multiple_Complex
Irs1	NM_010570; ENSMUST00000069799; BC157089; NM_010570.4; OTTMUST00000039671; uc007brp.2	TC0100002667.mm.1	16.3362	15.0324	16.5642	11.7942	13.1775	15.2422	13.4543	13.8326	insulin receptor substrate 1; Synthetic construct Mus musculus clone IMAGE:100063397, MGC:191077 insulin receptor substrate 1 (Irs1) mRNA, encodes complete protein.	Multiple_Complex
Col4a4	NM_007735; ENSMUST00000087050; ENSMUST00000135271; NM_007735.2; OTTMUST00000051472; OTTMUST00000051473; uc007brt.1	TC0100002673.mm.1	25.8125	26.9087	27.8576	29.0406	32.8996	38.3193	38.8542	30.6965	collagen, type IV, alpha 4	Multiple_Complex
Tm4sf20	NM_025453; ENSMUST00000027331; ENSMUST00000138787; BC117736; NM_025453.3; OTTMUST00000052559; OTTMUST00000052560; uc007bsd.1	TC0100002677.mm.1	29.446	24.9333	25.8125	28.84	31.3414	19.5622	30.0647	31.5594	transmembrane 4 L six family member 20	Multiple_Complex
Slc19a3	NM_030556; ENSMUST00000045560; ENSMUST00000142805; ENSMUST00000164473; BC109154; BC109155; NM_030556.2; OTTMUST00000054192; OTTMUST00000054193; uc007bsi.2; uc007bsj.2	TC0100002681.mm.1	30152.7	29737.6	33689.2	33456.5	16046.8	18433	22536.9	21769.2	solute carrier family 19, member 3	Multiple_Complex
Sphkap	NM_172430; ENSMUST00000053075; ENSMUST00000159078; ENSMUST00000160237; ENSMUST00000160567; ENSMUST00000160953; BC069832; NM_172430.3; OTTMUST00000074976; OTTMUST00000074977; OTTMUST00000074997; OTTMUST00000075028; OTTMUST00000075029; uc007bsp.2; uc007bsq.2; uc007bsr.2	TC0100002685.mm.1	18.3792	18.8959	20.393	19.9733	22.1618	23.2636	22.6274	20.393	SPHK1 interactor, AKAP domain containing	Multiple_Complex
Pid1	NM_001003948; ENSMUST00000168574; ENSMUST00000175948; ENSMUST00000175996; ENSMUST00000176559; ENSMUST00000176720; ENSMUST00000176822; ENSMUST00000177458; BC080290; NM_001003948.2; OTTMUST00000104053; OTTMUST00000104054; OTTMUST00000104055; OTTMUST00000104056; OTTMUST00000104057; OTTMUST00000104058; OTTMUST00000104059; uc007bst.2; uc007bsv.2	TC0100002690.mm.1	68.5935	64.8934	61.8199	57.2816	90.5097	100.427	63.5579	82.7106	phosphotyrosine interaction domain containing 1	Multiple_Complex
Trip12	NM_133975; ENSMUST00000027421; NM_133975.4; uc007bsy.1; uc007bsz.1; uc007btb.1	TC0100002698.mm.1	14868.8	16158.4	11113.3	8719.32	21027.6	13034.1	38431.5	34877.3	thyroid hormone receptor interactor 12	Multiple_Complex
C130026I21Rik; A530032D15Rik	NM_001037909; NM_175219; NM_213615; ENSMUST00000160792; ENSMUST00000161675; ENSMUST00000161724; BC007193; BC107246; BC107247; NM_001037909.3; NM_175219.3; NM_213615.2; uc007btf.1; uc007bti.1; uc007btj.1; uc007btn.1; uc007btt.1; uc007btu.1	TC0100002707.mm.1	14462.2	12944	16384	17438.6	5042.77	4837.35	11505.2	7696.57	RIKEN cDNA C130026I21 gene; RIKEN cDNA A530032D15Rik gene	Multiple_Complex
Gm2619; Csprs	XR_140448.1; uc007bth.2	TC0100002711.mm.1	127.116	108.383	99.0442	113.772	77.7085	58.892	59.3016	115.36	predicted gene 2619; component of Sp100-rs	Multiple_Complex
Gm7281	ENSMUST00000160010	TC0100002718.mm.1	5256.91	5077.84	4672.57	4153.18	2778.33	1541.37	4182.07	4389.98	predicted gene 7281 [Source:MGI Symbol;Acc:MGI:3779713]	Multiple_Complex
Csprs; Gm2666	BC071209; XM_001474231.2	TC0100002721.mm.1	53.8174	65.7993	51.6251	51.2685	64.8934	74.028	99.0442	81.0084	component of Sp100-rs; predicted gene 2666	Multiple_Complex
Sp110	NM_030194; NM_175397; ENSMUST00000093508; ENSMUST00000128339; ENSMUST00000130727; ENSMUST00000131950; ENSMUST00000143363; ENSMUST00000150114; ENSMUST00000151690; ENSMUST00000152399; BC039938; BC094500; NM_030194.1; NM_175397.4; OTTMUST00000060409; OTTMUST00000060410; OTTMUST00000060411; OTTMUST00000060476; OTTMUST00000060477; OTTMUST00000060478; OTTMUST00000060479; OTTMUST00000060480; uc007btz.2;…	TC0100002725.mm.1	49667	45387.3	46663.3	50710.6	10587	11585.2	27554.5	32316.9	Sp110 nuclear body protein	Multiple_Complex
A630001G21Rik	NM_177055; ENSMUST00000064788; ENSMUST00000159122; ENSMUST00000159320; ENSMUST00000159325; ENSMUST00000161453; ENSMUST00000162038; BC052931; NM_177055.3; uc007bui.2; uc007buj.2; uc011wod.1	TC0100002729.mm.1	137.187	133.436	153.277	151.167	69.0706	74.5429	71.5064	128.89	RIKEN cDNA A630001G21 gene	Multiple_Complex
Ncl	NM_010880; ENSMUST00000027438; BC005460; NM_010880.3; uc007bvl.1	TC0100002739.mm.1	11190.6	11993.8	11910.9	10660.6	1389.16	1052.79	6888.62	4837.35	nucleolin	Multiple_Complex
Gm24148	NR_106184	TC0100002741.mm.1	170.072	152.219	224.411	242.191	786.88	837.532	172.446	100.427	predicted gene, 24148	Multiple_Complex
Pde6d	NM_008801; ENSMUST00000027444; ENSMUST00000143674; ENSMUST00000146220; ENSMUST00000148683; ENSMUST00000150653; BC005636; NM_008801.2; OTTMUST00000051929; OTTMUST00000051930; OTTMUST00000051931; OTTMUST00000051932; OTTMUST00000078762; uc007bvq.1; uc011wok.1	TC0100002748.mm.1	202.251	233.941	179.769	216.767	151.167	235.568	74.5429	147.033	phosphodiesterase 6D, cGMP-specific, rod, delta	Multiple_Complex
Ecel1	NM_001277925; NM_021306; ENSMUST00000027463; ENSMUST00000159662; ENSMUST00000160810; ENSMUST00000161002; ENSMUST00000162015; BC057569; NM_021306.2; OTTMUST00000088526; OTTMUST00000088527; OTTMUST00000088528; OTTMUST00000088529; uc007bwc.1; uc007bwd.1	TC0100002758.mm.1	26.7228	27.6652	24.761	27.2843	26.3549	30.91	27.6652	24.4201	endothelin converting enzyme-like 1	Multiple_Complex
Ngef	NM_001111314; NM_019867; ENSMUST00000027477; ENSMUST00000068681; ENSMUST00000166463; ENSMUST00000168235; BC039279; NM_001111314.1; NM_019867.2; OTTMUST00000094294; OTTMUST00000094295; OTTMUST00000094298; OTTMUST00000094299; uc007bwx.2; uc007bwy.2	TC0100002764.mm.1	53.4456	44.9422	53.4456	51.9842	106.891	92.4115	58.4852	53.0765	neuronal guanine nucleotide exchange factor	Multiple_Complex
Gm6153	XR_140465.1	TC0100002766.mm.1	1243.34	1031.12	1217.75	1160.07	630.346	481.036	820.296	572.051	predicted gene 6153	Multiple_Complex
Usp40	NM_001033291; NM_001198573; ENSMUST00000040783; BC117957; BC117958; NM_001033291.2; NM_001198573.1; uc007bxw.1; uc007bxx.1; uc007bxy.1; uc007bxz.1; uc011wot.1; uc011wou.1	TC0100002769.mm.1	36.5044	34.2968	32.8996	32.4467	32.4467	30.6965	43.7133	33.8246	ubiquitin specific peptidase 40	Multiple_Complex
A730008H23Rik; Hjurp; 6430706D22Rik	NM_172505; NM_198652; NR_040291; BC057309; BC062125; BC131919; NM_198652.2; NR_040291.1; OTTMUST00000049209; OTTMUST00000049210; OTTMUST00000049211; OTTMUST00000049212; OTTMUST00000049213; OTTMUST00000049214; OTTMUST00000049215; uc007bym.2; uc007byn.2; uc007byo.1; uc011wow.1; uc029qrj.1	TC0100002772.mm.1	1640.59	1884.54	1418.35	1120.56	548.748	519.147	765.363	666.287	RIKEN cDNA A730008H23 gene; Holliday junction recognition protein; RIKEN cDNA 6430706D22 gene; RIKEN cDNA 6430706D22 gene (6430706D22Rik), non-coding RNA.	Multiple_Complex
Gbx2	NM_010262; ENSMUST00000036954; BC116965; BC120492; NM_010262.3; OTTMUST00000096174; uc007bzb.1	TC0100002781.mm.1	109.137	115.36	97.6806	103.968	224.411	213.783	83.2859	182.278	gastrulation brain homeobox 2	Multiple_Complex
Col6a3	NM_001243008; NM_001243009; ENSMUST00000056925; ENSMUST00000097653; ENSMUST00000130846; ENSMUST00000136916; ENSMUST00000145750; ENSMUST00000150769; NM_001243008.1; NM_001243009.1; OTTMUST00000053364; OTTMUST00000053365; OTTMUST00000053366; OTTMUST00000053367; OTTMUST00000053368; uc007bzk.1; uc011wpc.2; uc029qrp.1	TC0100002789.mm.1	37.7918	38.3193	36.5044	38.8542	43.4113	45.5696	42.2243	37.014	collagen, type VI, alpha 3	Multiple_Complex
Rab17	NM_001159725; NM_008998; ENSMUST00000027529; ENSMUST00000128226; ENSMUST00000130042; ENSMUST00000131428; ENSMUST00000135819; BC013170; BC051071; NM_001159725.2; NM_008998.4; OTTMUST00000066163; OTTMUST00000066164; OTTMUST00000066165; OTTMUST00000066166; OTTMUST00000066217; uc007bzn.2; uc007bzo.2	TC0100002793.mm.1	24.59	26.9087	27.2843	28.443	35.5062	31.779	32.2226	37.7918	RAB17, member RAS oncogene family	Multiple_Complex
Hes6	NM_019479; ENSMUST00000086851; ENSMUST00000126136; ENSMUST00000132188; ENSMUST00000150520; ENSMUST00000155752; BC012897; NM_019479.3; OTTMUST00000049445; OTTMUST00000049446; OTTMUST00000049447; OTTMUST00000049448; OTTMUST00000049449; uc007cat.2; uc007cau.1	TC0100002800.mm.1	28.84	28.6408	30.4844	28.443	37.5307	36.2523	39.6706	37.2715	hairy and enhancer of split 6	Multiple_Complex
Hdac4	NM_207225; ENSMUST00000008995; BC066052; NM_207225.1; uc007cbe.2; uc007cbf.2; uc007cbg.2	TC0100002806.mm.1	153.277	177.294	137.187	133.436	121.938	116.97	49.8665	122.786	histone deacetylase 4	Multiple_Complex
Ndufa10	NM_024197; ENSMUST00000027478; ENSMUST00000153897; BC003439; NM_024197.1; OTTMUST00000051651; OTTMUST00000051652; uc007cbh.1	TC0100002810.mm.1	765.363	709.176	754.826	724.077	989.119	968.763	770.686	685.019	NADH dehydrogenase (ubiquinone) 1 alpha subcomplex 10	Multiple_Complex
Myeov2	NM_001163425; NR_028108; ENSMUST00000097642; ENSMUST00000112999; ENSMUST00000129730; ENSMUST00000148508; ENSMUST00000154129; BC147334; BC147335; BC147659; BC147669; NM_001163425.1; NR_028108.1; OTTMUST00000052502; OTTMUST00000052503; OTTMUST00000052504; OTTMUST00000052505; OTTMUST00000052506; uc007cbq.2; uc011wpj.1	TC0100002816.mm.1	342.509	330.842	290.018	240.518	155.417	109.896	374.806	776.047	myeloma overexpressed 2	Multiple_Complex
Otos	NM_153114; ENSMUST00000053144; ENSMUST00000159803; BC100323; BC132494; BC132498; NM_153114.2; OTTMUST00000088368; OTTMUST00000088369; uc007cbr.1	TC0100002817.mm.1	22.0087	23.2636	22.1618	21.4068	33.5909	36.5044	26.9087	24.59	otospiralin	Multiple_Complex
Kif1a	NM_001110315; NM_008440; ENSMUST00000086819; ENSMUST00000112958; ENSMUST00000171556; ENSMUST00000171796; BC062891; NM_001110315.1; NM_008440.3	TC0100002827.mm.1	22.1618	24.59	24.761	25.4572	28.6408	30.91	29.446	23.7524	kinesin family member 1A	Multiple_Complex
Mterf4	NM_178051; ENSMUST00000027492; ENSMUST00000112942; ENSMUST00000112944; ENSMUST00000136754; ENSMUST00000152307; BC002280; BC055877; BC064709; OTTMUST00000051042; OTTMUST00000051043; OTTMUST00000051044; OTTMUST00000051045; OTTMUST00000074620; uc007cdo.1; uc007cdp.1	TC0100002831.mm.1	107.635	95.0095	82.1393	85.0359	50.9143	70.5219	65.3448	74.5429	mitochondrial transcription termination factor 4	Multiple_Complex
Pask	NM_080850; ENSMUST00000027493; ENSMUST00000128253; ENSMUST00000128655; ENSMUST00000133886; ENSMUST00000139028; ENSMUST00000148355; BC150821; NM_080850.2; OTTMUST00000051730; OTTMUST00000051823; OTTMUST00000051824; OTTMUST00000051825; OTTMUST00000051826; OTTMUST00000051827; uc007cdq.1; uc007cdr.1; uc007cdt.2; uc007cdu.1	TC0100002832.mm.1	141.044	134.364	128	126.238	75.5835	99.7331	83.8652	112.986	PAS domain containing serine/threonine kinase	Multiple_Complex
Hdlbp	NM_133808; ENSMUST00000042498; ENSMUST00000170883; BC021765; BC023806; BC025648; BC027779; BC027788; BC035301; NM_133808.4	TC0100002833.mm.1	6841.04	6936.54	6472.02	6653.97	21618.8	14868.8	12854.6	8779.97	high density lipoprotein (HDL) binding protein	Multiple_Complex
Stk25	NM_021537; ENSMUST00000027498; ENSMUST00000125778; ENSMUST00000133769; ENSMUST00000151068; ENSMUST00000154008; BC052913; BC071218; NM_021537.3; OTTMUST00000065416; OTTMUST00000065417; OTTMUST00000065418; OTTMUST00000065419; OTTMUST00000065420; uc007ced.1	TC0100002836.mm.1	1360.57	1314.23	1128.35	1097.5	1323.37	1128.35	1408.55	1379.57	serine/threonine kinase 25 (yeast)	Multiple_Complex
Dtymk	NM_001105667; NM_023136; ENSMUST00000027503; ENSMUST00000112890; ENSMUST00000112893; ENSMUST00000144106; BC030178; BC069902; NM_001105667.1; NM_023136.2; OTTMUST00000052626; OTTMUST00000052627; OTTMUST00000052628; OTTMUST00000052629; uc007cek.2; uc007cel.1; uc007cem.2	TC0100002838.mm.1	803.414	776.047	694.581	704.277	172.446	147.033	252.476	377.413	deoxythymidylate kinase	Multiple_Complex
Slco4c1	NM_172658; ENSMUST00000071985; BC119022; NM_172658.3; uc007cfc.1	TC0100002856.mm.1	1398.83	1234.75	1438.15	1136.2	177.294	219.793	206.5	781.445	solute carrier organic anion transporter family, member 4C1	Multiple_Complex
Slco6b1	NM_001039475; ENSMUST00000060976; NM_001039475.1; OTTMUST00000094675	TC0100002857.mm.1	20.6776	21.259	20.5348	22.4711	24.2515	31.5594	28.443	24.9333	solute carrier organic anion transporter family, member 6b1 (Slco6b1), mRNA.; solute carrier organic anion transporter family, member 6b1	Multiple_Complex
Gm9499	ENSMUST00000180888	TC0100002858.mm.1	28.443	27.6652	28.84	26.9087	35.5062	47.1766	39.6706	32	predicted gene 9499 [Source:MGI Symbol;Acc:MGI:3779909]	Multiple_Complex
Ppip5k2	NM_173760; ENSMUST00000042509; ENSMUST00000112845; ENSMUST00000137758; ENSMUST00000152788; ENSMUST00000171129; BC053396; NM_173760.4; OTTMUST00000052011; OTTMUST00000052012; OTTMUST00000052013; OTTMUST00000052014; uc007cfi.2; uc007cfk.2; uc007cfl.1	TC0100002864.mm.1	1675.06	1652	1060.11	879.171	2225.63	1509.65	4770.75	5518.27	diphosphoinositol pentakisphosphate kinase 2; diphosphoinositol pentakisphosphate kinase 2 (Ppip5k2), mRNA.	Multiple_Complex
Pam	NM_013626; ENSMUST00000058762; ENSMUST00000097625; ENSMUST00000159041; ENSMUST00000159131; ENSMUST00000159428; ENSMUST00000159585; ENSMUST00000159841; ENSMUST00000160210; ENSMUST00000161071; ENSMUST00000161567; ENSMUST00000162426; ENSMUST00000162681; ENSMUST00000162803; ENSMUST00000163007; BC166013; NM_013626.3; OTTMUST00000088381; OTTMUST00000088382; OTTMUST00000088383; OTTMUST00000088384; OTTMU…	TC0100002866.mm.1	27.6652	32	31.125	30.6965	33.3589	37.2715	32.6724	32.4467	peptidylglycine alpha-amidating monooxygenase; Synthetic construct Mus musculus clone IMAGE:100066313, MGC:195450 peptidylglycine alpha-amidating monooxygenase (Pam) mRNA, encodes complete protein.	Multiple_Complex
Tdpx-ps1	OTTMUST00000052609	TC0100002871.mm.1	62.2499	57.68	46.5271	51.2685	56.1028	58.0812	114.563	79.3413	thioredoxin peroxidase, pseudogene 1	Multiple_Complex
Rnf152	NM_001160368; NM_178779; ENSMUST00000058688; ENSMUST00000172299; BC118961; NM_001160368.1; NM_178779.4; uc011wpy.1; uc011wpz.1	TC0100002887.mm.1	46.5271	36.0019	36.5044	36.0019	50.2134	40.2244	34.0598	55.3304	ring finger protein 152	Multiple_Complex
Pign	NM_013784; ENSMUST00000070699; BC021148; NM_013784.3; uc007cgf.3; uc007cgg.2; uc007cgh.2; uc011wqa.2	TC0100002888.mm.1	352.139	385.343	263.197	230.72	421.679	337.794	427.565	1067.48	phosphatidylinositol glycan anchor biosynthesis, class N	Multiple_Complex
Gm7160	XM_983271.2	TC0100002890.mm.1	71.0124	60.9688	63.5579	65.3448	85.0359	92.4115	71.5064	77.1717	PREDICTED: predicted gene 7160 (Gm7160), mRNA.	Multiple_Complex
Bcl2	NM_009741; NM_177410; ENSMUST00000112751; BC068988; BC095964; NM_009741.3; NM_177410.2; OTTMUST00000052517; uc007cgw.1; uc011wqb.2	TC0100002894.mm.1	35.0174	38.3193	35.0174	35.261	58.892	50.5626	42.8137	36.0019	B cell leukemia/lymphoma 2	Multiple_Complex
Kdsr	NM_027534; ENSMUST00000010049; BC023820; NM_027534.2; uc007cgy.2	TC0100002899.mm.1	213.783	200.854	173.645	147.033	106.891	91.7731	119.428	233.941	3-ketodihydrosphingosine reductase	Multiple_Complex
Vps4b	NM_009190; ENSMUST00000094646; ENSMUST00000112736; ENSMUST00000126057; ENSMUST00000127606; ENSMUST00000147705; BC003799; NM_009190.2; OTTMUST00000051389; OTTMUST00000051390; OTTMUST00000051391; OTTMUST00000051392; OTTMUST00000051393; uc007cgz.2	TC0100002900.mm.1	300.246	298.172	229.126	210.839	209.383	186.108	167.73	324.034	vacuolar protein sorting 4b (yeast)	Multiple_Complex
Gm15388	ENSMUST00000121578	TC0100002905.mm.1	53.0765	50.9143	58.4852	77.7085	33.1285	26.5382	36.5044	34.0598	predicted gene 15388 [Source:MGI Symbol;Acc:MGI:3705340]	Multiple_Complex
Gm15390	ENSMUST00000120323	TC0100002908.mm.1	73.5167	50.9143	83.2859	86.2229	43.7133	49.8665	88.647	33.5909	predicted gene 15390 [Source:MGI Symbol;Acc:MGI:3705482]	Multiple_Complex
2900060B14Rik	NR_027901; ENSMUST00000097615; NR_027901.1; uc007cih.2	TC0100002938.mm.1	424.612	388.023	494.559	497.999	218.275	477.713	120.259	121.095	RIKEN cDNA 2900060B14 gene	Multiple_Complex
Gli2	NM_001081125; ENSMUST00000062483; ENSMUST00000159678; ENSMUST00000159839; ENSMUST00000160991; ENSMUST00000161056; ENSMUST00000161301; ENSMUST00000161451; ENSMUST00000162552; ENSMUST00000162607; BC082604; BC085190; NM_001081125.1; OTTMUST00000088493; OTTMUST00000088494; OTTMUST00000088495; OTTMUST00000088496; OTTMUST00000088497; OTTMUST00000088498; OTTMUST00000088499; OTTMUST00000088500; OTTMUST00…	TC0100002942.mm.1	53.0765	57.2816	52.7098	54.9482	47.1766	58.0812	49.8665	43.4113	GLI-Kruppel family member GLI2	Multiple_Complex
Ralb	NM_022327; ENSMUST00000004565; ENSMUST00000142945; ENSMUST00000156213; BC006907; NM_022327.5; OTTMUST00000051693; OTTMUST00000051694; OTTMUST00000075366; uc007cis.2	TC0100002947.mm.1	50.9143	51.2685	48.1679	46.5271	54.9482	61.8199	60.5477	54.1917	v-ral simian leukemia viral oncogene homolog B (ras related)	Multiple_Complex
Epb41l5	NM_001113416; NM_145506; ENSMUST00000027632; ENSMUST00000052404; ENSMUST00000163147; BC003937; BC011476	TC0100002950.mm.1	770.686	814.629	584.071	519.147	588.134	522.758	724.077	1002.93	erythrocyte membrane protein band 4.1 like 5	Multiple_Complex
Ptpn4	NM_019933; ENSMUST00000064091; ENSMUST00000163179; ENSMUST00000163435; ENSMUST00000163621; ENSMUST00000164086; ENSMUST00000164269; ENSMUST00000166422; ENSMUST00000166624; ENSMUST00000168303; ENSMUST00000168429; ENSMUST00000168808; NM_019933.2; OTTMUST00000090386; OTTMUST00000090387; OTTMUST00000090390; OTTMUST00000090391; OTTMUST00000090434; OTTMUST00000090435; OTTMUST00000090436; OTTMUST00000090…	TC0100002954.mm.1	317.365	324.034	242.191	247.28	196.72	183.546	300.246	266.871	protein tyrosine phosphatase, non-receptor type 4	Multiple_Complex
Dbi	NM_001037999; NM_007830; ENSMUST00000027634; ENSMUST00000112648; ENSMUST00000128408; ENSMUST00000132118; ENSMUST00000135937; ENSMUST00000149628; ENSMUST00000151708; BC028874; NM_001037999.2; NM_007830.4; OTTMUST00000051289; OTTMUST00000051290; OTTMUST00000051291; OTTMUST00000051292; OTTMUST00000051293; OTTMUST00000051294; OTTMUST00000051295; uc007cje.1; uc007cjf.2	TC0100002964.mm.1	160.898	176.069	111.43	113.772	127.116	113.772	390.722	278.204	diazepam binding inhibitor	Multiple_Complex
Insig2	NM_001271531; NM_001271532; NM_133748; NM_178082; ENSMUST00000003818; ENSMUST00000071064; ENSMUST00000159085; ENSMUST00000159125; ENSMUST00000159192; ENSMUST00000159528; ENSMUST00000160688; ENSMUST00000160968; ENSMUST00000161068; ENSMUST00000161818; ENSMUST00000162019; ENSMUST00000162582; ENSMUST00000162790; BC015288; BC023067; BC023874; BC024411; NM_133748.1; NM_178082.2; OTTMUST00000088551; OTT…	TC0100002969.mm.1	60.9688	85.0359	51.9842	52.3457	61.3929	56.1028	90.5097	112.206	insulin induced gene 2	Multiple_Complex
Gm15393	ENSMUST00000120499	TC0100002972.mm.1	694.581	608.874	1251.98	2241.11	380.038	639.145	118.603	179.769	predicted gene 15393 [Source:MGI Symbol;Acc:MGI:3705387]	Multiple_Complex
Ddx18	NM_025860; ENSMUST00000001724; ENSMUST00000131471; ENSMUST00000134417; ENSMUST00000148809; BC028246; BC103776; BC141230; BC141231; NM_025860.3; OTTMUST00000047501; OTTMUST00000047502; OTTMUST00000049719; OTTMUST00000049720; uc007cjw.2	TC0100002974.mm.1	6472.02	5518.27	6653.97	5996.9	1089.92	1370.04	3236.01	3848.29	DEAD (Asp-Glu-Ala-Asp) box polypeptide 18	Multiple_Complex
Dpp10	NM_199021; ENSMUST00000112603; ENSMUST00000112606; ENSMUST00000140361; BC063074; BC067026; NM_199021.3; OTTMUST00000049175; OTTMUST00000049176; OTTMUST00000049177; uc007cjx.2	TC0100002977.mm.1	44.0173	43.4113	43.7133	37.2715	64	51.2685	41.3553	55.3304	dipeptidylpeptidase 10	Multiple_Complex
Nckap5	NM_001081756; NM_172484; NM_176957; ENSMUST00000057846; ENSMUST00000094609; ENSMUST00000094610; ENSMUST00000112583; ENSMUST00000159934; ENSMUST00000160693; ENSMUST00000160736; ENSMUST00000161954; ENSMUST00000162646; ENSMUST00000162647; ENSMUST00000162664; ENSMUST00000162877; BC066095; BC079551; NM_001081756.1; NM_172484.3; NM_176957.3; OTTMUST00000074895; OTTMUST00000074896; OTTMUST00000074897; O…	TC0100002998.mm.1	90.5097	85.0359	70.0348	70.5219	121.938	74.5429	69.0706	88.0347	NCK-associated protein 5	Multiple_Complex
Tmem163	NM_028135; ENSMUST00000027585; ENSMUST00000160111; ENSMUST00000160616; ENSMUST00000162406; BC046234; BC059048; NM_028135.2; OTTMUST00000075105; OTTMUST00000075106; OTTMUST00000075107; OTTMUST00000078911; uc007cku.1; uc011wqz.1	TC0100003010.mm.1	21.5557	21.4068	21.8566	22.0087	22.1618	24.0839	26.9087	25.6342	transmembrane protein 163	Multiple_Complex
Zranb3	NM_001285945; NM_027678; ENSMUST00000086614; ENSMUST00000097597; ENSMUST00000112538; ENSMUST00000124876; ENSMUST00000127393; ENSMUST00000131732; ENSMUST00000143389; BC066035; BC117921; BC117922; NM_027678.2; OTTMUST00000042232; OTTMUST00000042233; OTTMUST00000042234; OTTMUST00000042235; OTTMUST00000042236; OTTMUST00000042237; OTTMUST00000042238; uc007cld.1; uc007cle.1; uc007clf.1; uc007clg.1	TC0100003021.mm.1	84.4485	82.7106	74.5429	71.0124	62.2499	64.8934	53.4456	88.647	zinc finger, RAN-binding domain containing 3; zinc finger, RAN-binding domain containing 3 (Zranb3), mRNA.	Multiple_Complex
Lct	NM_001081078; ENSMUST00000073490; ENSMUST00000162067; NM_001081078.1; OTTMUST00000075103; OTTMUST00000075104; uc007clm.1	TC0100003025.mm.1	37.014	36.2523	33.1285	37.014	37.5307	48.5029	42.2243	42.8137	lactase	Multiple_Complex
Dars	NM_145507; NM_177445; ENSMUST00000027602; ENSMUST00000064309; BC008638; NM_145507.2; NM_177445.5; uc007clp.2; uc007clr.2; uc011wrd.1	TC0100003027.mm.1	1845.76	1770.57	1698.45	1640.59	576.03	867.067	3236.01	2256.7	aspartyl-tRNA synthetase	Multiple_Complex
Cd55b	NM_007827; ENSMUST00000112488; ENSMUST00000119432; ENSMUST00000136497; BC127150; OTTMUST00000061937; OTTMUST00000061938; OTTMUST00000074408	TC0100003035.mm.1	448.822	398.932	424.612	396.177	1192.69	1192.69	396.177	670.921	CD55 molecule, decay accelerating factor for complement B	Multiple_Complex
Cd55	NM_010016; ENSMUST00000027650; ENSMUST00000122830; ENSMUST00000133057; ENSMUST00000140400; ENSMUST00000140725; BC011314; NM_010016.2; OTTMUST00000061930; OTTMUST00000061931; OTTMUST00000061932; OTTMUST00000061933; OTTMUST00000061934; uc007cly.1; uc007clz.2; uc029qte.1	TC0100003037.mm.1	2876.3	3019.3	2574.36	2418.67	5595.3	4973.34	3769.09	4803.93	CD55 molecule, decay accelerating factor for complement; CD55 antigen	Multiple_Complex
Pfkfb2; C4bp-ps1	NM_001162415; NM_001162416; NM_008825; NR_027859; NR_028304; ENSMUST00000050406; ENSMUST00000066863; ENSMUST00000169659; ENSMUST00000171479; BC018418; BC051014; NM_001162415.1; NM_001162416.1; NM_008825.4; NR_027859.1; uc007cme.2; uc007cmf.2; uc007cmg.2; uc011wrf.1; uc011wrg.1; uc011wrh.1; uc011wri.1; uc011wrj.1	TC0100003042.mm.1	40.7859	40.5042	36.5044	38.8542	69.0706	60.1295	41.9326	49.5221	6-phosphofructo-2-kinase/fructose-2,6-biphosphatase 2; complement component 4 binding protein, pseudogene 1	Multiple_Complex
Mapkapk2	NM_008551; ENSMUST00000016672; BC063064; NM_008551.1; uc007cmv.1	TC0100003051.mm.1	709.176	704.277	724.077	744.434	600.491	576.03	117.784	596.344	MAP kinase-activated protein kinase 2	Multiple_Complex
Rassf5	NM_018750; ENSMUST00000027688; ENSMUST00000068564; ENSMUST00000112442; ENSMUST00000124796; BC089605; NM_018750.3; OTTMUST00000051125; OTTMUST00000051126; OTTMUST00000051127; OTTMUST00000051128; uc007cnc.1; uc007cnd.1; uc011wro.1	TC0100003056.mm.1	685.019	680.287	504.951	487.751	2272.4	1734.13	1552.09	770.686	Ras association (RalGDS/AF-6) domain family member 5	Multiple_Complex
Ikbke	NM_019777; ENSMUST00000062108; ENSMUST00000159195; ENSMUST00000160748; ENSMUST00000161764; ENSMUST00000162285; ENSMUST00000162437; ENSMUST00000163029; BC037446; NM_019777.3; OTTMUST00000088400; OTTMUST00000088401; OTTMUST00000088402; OTTMUST00000088403; OTTMUST00000088404; OTTMUST00000088405; OTTMUST00000088406; uc007cne.1; uc007cnf.1	TC0100003057.mm.1	19.4271	21.1121	20.9663	22.7848	26.9087	30.6965	30.6965	23.1029	inhibitor of kappaB kinase epsilon	Multiple_Complex
Mfsd4	NM_001114662; NM_172510; ENSMUST00000046658; ENSMUST00000112365; ENSMUST00000112370; ENSMUST00000126927; ENSMUST00000144548; ENSMUST00000146267; ENSMUST00000159038; ENSMUST00000159382; ENSMUST00000160656; ENSMUST00000161864; ENSMUST00000162628; ENSMUST00000163016; BC058790; NM_001114662.1; NM_172510.4; OTTMUST00000061509; OTTMUST00000061510; OTTMUST00000061511; OTTMUST00000061512; OTTMUST00000061…	TC0100003068.mm.1	49.8665	52.3457	51.2685	51.9842	60.5477	65.3448	56.8859	59.3016	major facilitator superfamily domain containing 4	Multiple_Complex
Tmcc2	NM_178874; ENSMUST00000045473; ENSMUST00000125439; ENSMUST00000132435; ENSMUST00000136828; ENSMUST00000138717; ENSMUST00000142609; BC052035; NM_178874.2; OTTMUST00000066282; OTTMUST00000066283; OTTMUST00000066284; OTTMUST00000066285; OTTMUST00000066286; OTTMUST00000066287; uc007cor.1; uc007cos.1; uc007cot.1	TC0100003074.mm.1	202.251	179.769	182.278	179.769	552.565	451.944	243.875	163.144	transmembrane and coiled-coil domains 2	Multiple_Complex
Cntn2	NM_177129; ENSMUST00000086521; BC066106; NM_177129.5; uc007cpa.1; uc007cpb.1; uc007cpc.1	TC0100003079.mm.1	49.5221	52.3457	49.18	48.1679	94.3532	73.0089	44.9422	62.2499	contactin 2	Multiple_Complex
Nfasc	NM_001160316; NM_001160317; NM_001160318; NM_182716; ENSMUST00000043189; ENSMUST00000094569; ENSMUST00000163770; NM_001160316.1; NM_001160317.1; NM_001160318.1; NM_182716.4; uc007cpd.2; uc007cpe.2; uc007cpf.2; uc007cpg.2; uc011wrx.1	TC0100003080.mm.1	23.4254	23.2636	25.9921	26.9087	33.8246	39.6706	34.5353	23.9176	neurofascin	Multiple_Complex
Mdm4	NM_008575; ENSMUST00000067398; ENSMUST00000067429; BC003750; NM_008575.3	TC0100003087.mm.1	160254	165905	136638	124002	153726	136638	165905	198668	transformed mouse 3T3 cell double minute 4	Multiple_Complex
Sox13	NM_011439; ENSMUST00000094551; ENSMUST00000126530; ENSMUST00000144386; ENSMUST00000145922; ENSMUST00000153799; BC007130; NM_011439.2; OTTMUST00000066297; OTTMUST00000066298; OTTMUST00000066299; OTTMUST00000066300; uc007cqj.1; uc007cqk.1	TC0100003090.mm.1	152.219	149.086	162.017	162.017	87.4266	92.4115	69.551	79.8932	SRY (sex determining region Y)-box 13; SRY-box containing gene 13	Multiple_Complex
Zbed6; Zc3h11a	NM_001166552; NM_001276767; NM_144530; ENSMUST00000027736; BC005786; BC066163; BC066848; NM_001166552.1; NM_144530.5; uc007cqn.1; uc007cqo.1; uc007cqq.1; uc007cqm.1; uc007cqp.1; uc007cqr.2; uc011wsb.1	TC0100003093.mm.1	1398.83	1314.23	1408.55	1251.98	544.958	404.501	266.871	891.444	zinc finger, BED type containing 6; zinc finger CCCH type containing 11A; zinc finger, BED domain containing 6; zinc finger CCCH type containing 11A (Zc3h11a), mRNA.	Multiple_Complex
Atp2b4; Mir6903	NM_001167949; NM_213616; NR_105868; ENSMUST00000048953; ENSMUST00000112264; ENSMUST00000125659; ENSMUST00000128692; ENSMUST00000140810; ENSMUST00000143567; ENSMUST00000165602; BC109172; BC109173; NM_001167949.2; NM_213616.4; OTTMUST00000039586; OTTMUST00000039594; OTTMUST00000039595; OTTMUST00000039596; OTTMUST00000039597; uc007cqu.3; uc007cqv.3; uc007cqw.1; uc007cqx.1; uc011wsc.2	TC0100003096.mm.1	149.086	136.239	142.025	130.69	224.411	166.572	195.361	288.015	ATPase, Ca++ transporting, plasma membrane 4; microRNA 6903	Multiple_Complex
Optc	NM_001160420; NM_001160421; NM_001160422; NM_054076; ENSMUST00000124051; ENSMUST00000124245; ENSMUST00000126123; ENSMUST00000149380; ENSMUST00000153617; BC099435; BC115928; NM_001160420.1; NM_001160421.1; NM_001160422.1; NM_054076.2; OTTMUST00000066466; OTTMUST00000066467; OTTMUST00000066468; OTTMUST00000066469; OTTMUST00000066470; uc007cqy.2; uc007cqz.2; uc007cra.2; uc007crb.3	TC0100003098.mm.1	24.4201	28.443	31.779	31.125	35.0174	42.5179	39.1245	24.4201	opticin	Multiple_Complex
Prelp	NM_054077; ENSMUST00000048432; ENSMUST00000127583; BC019775; NM_054077.4; OTTMUST00000066465; OTTMUST00000066608; uc007crc.3	TC0100003099.mm.1	78.249	77.1717	59.3016	68.5935	178.527	132.514	63.1189	97.0059	proline arginine-rich end leucine-rich repeat	Multiple_Complex
Mgat4e	NM_001145300; ENSMUST00000052911; ENSMUST00000172898; BC145149; BC145786; OTTMUST00000096412	TC0100003111.mm.1	26.3549	27.6652	28.443	24.2515	22.1618	28.0514	23.4254	19.2929	MGAT4 family, member E	Multiple_Complex
Ppp1r12b	NM_001081307; NR_015606; ENSMUST00000045665; ENSMUST00000086444; ENSMUST00000112163; ENSMUST00000132025; ENSMUST00000137022; ENSMUST00000141419; ENSMUST00000146639; ENSMUST00000156348; ENSMUST00000168381; BC145746; NM_001081307.1; NR_015606.3; OTTMUST00000051282; OTTMUST00000051283; OTTMUST00000051284; OTTMUST00000051285; OTTMUST00000051286; OTTMUST00000051287; OTTMUST00000051288; uc007csl.1; uc0…	TC0100003113.mm.1	57.2816	55.3304	51.6251	56.1028	82.7106	71.5064	64.4452	60.1295	protein phosphatase 1, regulatory (inhibitor) subunit 12B	Multiple_Complex
Lgr6	NM_001033409; ENSMUST00000044828; ENSMUST00000137968; ENSMUST00000139369; BC141210; NM_001033409.3; OTTMUST00000066294; OTTMUST00000066295; OTTMUST00000066296; uc007csq.1	TC0100003119.mm.1	46.8507	43.4113	44.9422	48.5029	64	63.5579	70.0348	48.1679	leucine-rich repeat-containing G protein-coupled receptor 6	Multiple_Complex
Ptprv	NM_007955; BC157049; NM_007955.3; OTTMUST00000114101; OTTMUST00000114102; OTTMUST00000114103; OTTMUST00000114104; OTTMUST00000114105; OTTMUST00000114106; OTTMUST00000114109; OTTMUST00000114110; OTTMUST00000114111; OTTMUST00000114112; uc007csr.2	TC0100003120.mm.1	32.8996	32.2226	33.1285	35.0174	46.2057	47.8352	34.5353	33.5909	protein tyrosine phosphatase, receptor type, V; Synthetic construct Mus musculus clone IMAGE:100063271, MGC:191047 protein tyrosine phosphatase, receptor type, V (Ptprv) mRNA, encodes complete protein.	Multiple_Complex
Gpr37l1	NM_134438; ENSMUST00000027682; BC098482; BC127619; BC127620; NM_134438.3; OTTMUST00000052472; uc007csv.2	TC0100003122.mm.1	36.2523	36.2523	33.8246	34.7755	42.5179	50.2134	43.1115	50.9143	G protein-coupled receptor 37-like 1	Multiple_Complex
Rnpep	NM_001159624; NM_145417; ENSMUST00000074357; ENSMUST00000077340; ENSMUST00000130069; ENSMUST00000141092; ENSMUST00000141234; ENSMUST00000152169; BC019200; NM_001159624.1; NM_145417.3; OTTMUST00000051810; OTTMUST00000051811; OTTMUST00000051812; OTTMUST00000051813; OTTMUST00000051814; OTTMUST00000051815; uc007csy.2; uc011wsi.1	TC0100003124.mm.1	592.224	530.056	797.865	849.223	199.466	252.476	310.834	213.783	arginyl aminopeptidase (aminopeptidase B)	Multiple_Complex
Timm17a	NM_011590; ENSMUST00000081104; ENSMUST00000125454; ENSMUST00000134088; ENSMUST00000152706; BC010830; BC098216; NM_011590.2; OTTMUST00000051974; OTTMUST00000078084; OTTMUST00000078085; OTTMUST00000078086; uc007csz.1	TC0100003125.mm.1	30786.3	26801	26432	23170.5	1458.23	867.067	10155.7	12245.8	translocase of inner mitochondrial membrane 17a	Multiple_Complex
Shisa4	NM_175259; ENSMUST00000041240; ENSMUST00000159181; ENSMUST00000159918; BC044813; NM_175259.4; OTTMUST00000066301; OTTMUST00000066302; OTTMUST00000066303; uc007ctc.1; uc007ctd.1	TC0100003127.mm.1	32.6724	34.2968	32.4467	30.91	33.8246	38.0546	46.8507	38.5859	shisa family member 4; shisa homolog 4 (Xenopus laevis)	Multiple_Complex
Ipo9	NM_153774; ENSMUST00000041023; ENSMUST00000159017; ENSMUST00000159089; ENSMUST00000159173; ENSMUST00000159487; ENSMUST00000161032; ENSMUST00000161135; ENSMUST00000161189; ENSMUST00000161258; ENSMUST00000161704; ENSMUST00000161750; ENSMUST00000161838; ENSMUST00000161934; ENSMUST00000162858; BC098508; NM_153774.1; OTTMUST00000088431; OTTMUST00000088432; OTTMUST00000088433; OTTMUST00000088434; OTTMU…	TC0100003128.mm.1	215.269	209.383	194.012	182.278	216.767	210.839	461.44	274.374	importin 9	Multiple_Complex
Nav1	NM_173437; ENSMUST00000040599; ENSMUST00000067414; BC059840; NM_173437.2; uc007ctg.2; uc007ctj.2; uc007ctk.1; uc007ctl.1; uc011wsl.1	TC0100003129.mm.1	112.206	131.599	118.603	101.125	205.074	166.572	115.36	160.898	neuron navigator 1	Multiple_Complex
Pkp1	NM_019645; ENSMUST00000027667; ENSMUST00000132793; ENSMUST00000163260; BC139041; BC139042; NM_019645.2; OTTMUST00000053857; OTTMUST00000053858; OTTMUST00000090231; uc007cub.1; uc011wss.1	TC0100003138.mm.1	21.1121	22.4711	23.7524	22.3159	29.6508	29.2426	25.2813	22.9433	plakophilin 1	Multiple_Complex
Igfn1	NM_177642; ENSMUST00000124134; ENSMUST00000127406; ENSMUST00000129302; ENSMUST00000140703; ENSMUST00000166193; BC107027; BC107028; NM_177642.3; OTTMUST00000046954; OTTMUST00000046955; OTTMUST00000047090; OTTMUST00000047091; uc007cuc.2; uc007cud.2; uc011wst.1; uc011wsu.1	TC0100003139.mm.1	20.8215	20.8215	23.1029	21.8566	27.0958	26.3549	28.2465	23.2636	immunoglobulin-like and fibronectin type III domain containing 1	Multiple_Complex
Mroh3	OTTMUST00000094206; OTTMUST00000094305; OTTMUST00000094306; OTTMUST00000094307; XR_033650.3; uc007cun.1	TC0100003141.mm.1	26.5382	28.2465	31.5594	31.5594	51.2685	50.2134	36.5044	36.5044	maestro heat-like repeat family member 3	Multiple_Complex
Camsap2	NM_001081360; ENSMUST00000048309; BC138367; BC145258; NM_001081360.1; uc007cuq.1; uc007cur.2; uc011wsz.1; uc011wta.1	TC0100003146.mm.1	5752.61	5832.91	5148.73	3956.48	7696.57	5148.73	6295.04	8135.41	calmodulin regulated spectrin-associated protein family, member 2	Multiple_Complex
Ptprc	NM_001111316; NM_001268286; NM_011210; ENSMUST00000027645; ENSMUST00000112036; ENSMUST00000182138; ENSMUST00000182283; ENSMUST00000182536; ENSMUST00000182755; ENSMUST00000183229; ENSMUST00000183262; ENSMUST00000183301; BC167212; NM_001111316.1; NM_011210.3; OTTMUST00000113094; OTTMUST00000113095; OTTMUST00000113096; OTTMUST00000113097; OTTMUST00000113099; OTTMUST00000113100; OTTMUST00000113101; u…	TC0100003167.mm.1	19.5622	19.0273	20.393	20.6776	26.5382	28.0514	26.5382	20.5348	protein tyrosine phosphatase, receptor type, C; Synthetic construct Mus musculus clone IMAGE:100068112, MGC:195729 protein tyrosine phosphatase, receptor type, C (Ptprc) mRNA, encodes complete protein.; protein tyrosine phosphatase, receptor type, C (Ptprc), transcript variant 3, mRNA.	Multiple_Complex
Nek7	NM_021605; ENSMUST00000027642; BC037697; NM_021605.3; uc007cvn.1; uc007cvo.1; uc011wtb.1	TC0100003170.mm.1	855.13	843.357	576.03	458.253	1024	843.357	6841.04	1468.37	NIMA (never in mitosis gene a)-related expressed kinase 7	Multiple_Complex
Lhx9	NM_001025565; NM_001042577; NM_010714; ENSMUST00000019374; ENSMUST00000046870; ENSMUST00000093486; ENSMUST00000112026; ENSMUST00000112030; BC072623; NM_001025565.2; NM_001042577.1; NM_010714.3; OTTMUST00000054112; OTTMUST00000054113; OTTMUST00000054114; OTTMUST00000054115; uc007cvr.1; uc007cvs.1; uc007cvt.1; uc007cvu.2	TC0100003175.mm.1	20.9663	18.507	22.7848	21.4068	27.0958	34.7755	26.7228	20.5348	LIM homeobox protein 9	Multiple_Complex
2310009B15Rik	NM_001081226; ENSMUST00000112025; NM_001081226.1; uc007cvv.1; uc007cvw.1	TC0100003176.mm.1	44.6318	47.5048	42.8137	43.1115	42.2243	41.6429	41.9326	41.3553	RIKEN cDNA 2310009B15 gene	Multiple_Complex
Gm16304	ENSMUST00000129972	TC0100003182.mm.1	29.8571	30.2738	32.6724	32.4467	22.4711	26.1729	38.5859	25.8125	predicted gene 16304 [Source:MGI Symbol;Acc:MGI:3826518]	Multiple_Complex
Crb1	NM_133239; ENSMUST00000059825; ENSMUST00000123065; ENSMUST00000131586; ENSMUST00000132845; ENSMUST00000133765; ENSMUST00000136062; ENSMUST00000137030; ENSMUST00000145244; BC167170; NM_133239.2; OTTMUST00000085739; OTTMUST00000085740; OTTMUST00000085741; OTTMUST00000085742; OTTMUST00000085743; OTTMUST00000085744; OTTMUST00000085745; OTTMUST00000085746; uc007cwc.1; uc007cwd.1; uc007cwe.1; uc007cwf.1	TC0100003183.mm.1	32.8996	31.5594	31.5594	31.779	38.3193	44.0173	34.7755	58.0812	crumbs family member 1, photoreceptor morphogenesis associated; crumbs homolog 1 (Drosophila); Synthetic construct Mus musculus clone IMAGE:100068070, MGC:195687 crumbs homolog 1 (Drosophila) (Crb1) mRNA, encodes complete protein.	Multiple_Complex
Cfhr1	NM_015780; ENSMUST00000023965; ENSMUST00000160423; ENSMUST00000161224; BC111870; NM_015780.2; OTTMUST00000088574; OTTMUST00000088575; OTTMUST00000088593; uc007cwl.1	TC0100003186.mm.1	17.8766	19.0273	19.4271	18.2522	23.7524	31.3414	45.8866	30.2738	complement factor H-related 1	Multiple_Complex
Cfhr3	XM_003085329.1	TC0100003187.mm.1	23.1029	22.1618	22.6274	22.7848	32.2226	32	31.779	27.4741	complement factor H-related 3	Multiple_Complex
Cfhr2	NM_001025575; ENSMUST00000094489; NM_001025575.2; OTTMUST00000084792; uc007cwp.2; uc007cwq.1; uc007cwr.1	TC0100003191.mm.1	39.3966	50.9143	42.2243	43.4113	53.0765	51.6251	44.3235	75.5835	complement factor H-related 2	Multiple_Complex
Cfh	NM_009888; ENSMUST00000066859; ENSMUST00000111976; ENSMUST00000111977; ENSMUST00000123238; ENSMUST00000148225; BC066092; NM_009888.3; OTTMUST00000060596; OTTMUST00000060597; OTTMUST00000060598; OTTMUST00000060599; uc007cws.1; uc007cwt.1; uc007cwu.1; uc011wtg.1	TC0100003193.mm.1	36.5044	44.3235	40.2244	41.3553	47.5048	48.8403	43.7133	75.0614	complement component factor h	Multiple_Complex
Cdc73	NM_145991; ENSMUST00000018337; ENSMUST00000105081; ENSMUST00000159794; ENSMUST00000162638; BC027756; BC031127; NM_145991.1; OTTMUST00000076702; OTTMUST00000076703; OTTMUST00000076704; uc007cwx.1	TC0100003202.mm.1	418.766	396.177	404.501	390.722	238.856	173.645	195.361	278.204	cell division cycle 73, Paf1/RNA polymerase II complex component	Multiple_Complex
Trove2	NM_013835; ENSMUST00000018343; ENSMUST00000159879; BC051974; BC052380; NM_013835.2; OTTMUST00000051883; OTTMUST00000051884; uc007cxd.1	TC0100003203.mm.1	42.8137	44.0173	43.4113	36.7583	42.8137	44.6318	40.7859	60.5477	TROVE domain family, member 2	Multiple_Complex
Rgs2	NM_009061; ENSMUST00000027606; ENSMUST00000127206; ENSMUST00000134817; ENSMUST00000153527; BC023001; NM_009061.4; OTTMUST00000049364; OTTMUST00000049365; OTTMUST00000049366; OTTMUST00000049367; uc007cxg.2	TC0100003204.mm.1	1820.35	1992	1398.83	1562.89	1009.9	3040.3	809.002	2503.97	regulator of G-protein signaling 2	Multiple_Complex
Rgs1	NM_015811; ENSMUST00000167317; ENSMUST00000167812; ENSMUST00000169042; ENSMUST00000169409; ENSMUST00000170870; ENSMUST00000172388; BC028634; NM_015811.2; OTTMUST00000089512; OTTMUST00000089513; OTTMUST00000089514; OTTMUST00000089515; OTTMUST00000089516; OTTMUST00000089517; uc007cxj.2; uc007cxk.1	TC0100003207.mm.1	20.393	18.6357	20.2521	18.8959	25.1067	25.6342	27.8576	23.9176	regulator of G-protein signaling 1	Multiple_Complex
Gm15443	ENSMUST00000118947	TC0100003225.mm.1	2778.33	2418.67	2797.65	3019.3	439.586	385.343	1428.22	1234.75	predicted gene 15443 [Source:MGI Symbol;Acc:MGI:3642525]	Multiple_Complex
Pla2g4a	NM_008869; ENSMUST00000070200; ENSMUST00000111926; ENSMUST00000134676; ENSMUST00000142040; ENSMUST00000155438; BC003816; NM_008869.3; OTTMUST00000039570; OTTMUST00000039571; OTTMUST00000039572; OTTMUST00000039573; OTTMUST00000047354	TC0100003233.mm.1	27.0958	29.0406	30.6965	31.3414	31.125	37.014	33.1285	31.5594	phospholipase A2, group IVA (cytosolic, calcium-dependent)	Multiple_Complex
Gm15453	ENSMUST00000179686; XM_001480197.2	TC0100003237.mm.1	580.037	501.463	604.668	481.036	278.204	212.306	349.706	600.491	predicted gene 15453	Multiple_Complex
BC003331	NM_001077237; NM_145511; ENSMUST00000006167; ENSMUST00000094477; ENSMUST00000097546; ENSMUST00000097547; ENSMUST00000111913; ENSMUST00000132809; ENSMUST00000140112; ENSMUST00000148389; ENSMUST00000150615; BC003331; NM_001077237.1; NM_145511.2; uc007cxy.1; uc007cxz.1; uc007cya.1	TC0100003239.mm.1	335.461	413.001	344.892	354.588	186.108	186.108	98.36	390.722	cDNA sequence BC003331	Multiple_Complex
Hmcn1	NM_001024720; ENSMUST00000074783; ENSMUST00000137197; ENSMUST00000137909; ENSMUST00000151899; ENSMUST00000155715; ENSMUST00000177036; NM_001024720.3; OTTMUST00000051425; OTTMUST00000083230; OTTMUST00000083231; OTTMUST00000083232; OTTMUST00000083233; OTTMUST00000103345; uc007cyj.1; uc007cyl.1	TC0100003241.mm.1	17.3878	17.3878	17.6305	18.8959	22.4711	27.0958	24.4201	18.1261	hemicentin 1	Multiple_Complex
Gm10138	ENSMUST00000076388	TC0100003252.mm.1	76.6386	83.8652	110.661	91.1392	71.5064	71.5064	25.9921	37.5307	predicted gene 10138	Multiple_Complex
Swt1	NM_025819; ENSMUST00000064771; ENSMUST00000111883; ENSMUST00000124880; ENSMUST00000129939; ENSMUST00000131312; ENSMUST00000138095; ENSMUST00000139244; ENSMUST00000141977; BC055064; BC060204; NM_025819.4; OTTMUST00000085525; OTTMUST00000085526; OTTMUST00000085527; OTTMUST00000085528; OTTMUST00000085529; OTTMUST00000085530; OTTMUST00000085531; OTTMUST00000085532; uc007cyq.2; uc011wtm.1	TC0100003253.mm.1	3929.15	3848.29	3615.55	3468.27	2149.82	1595.73	5256.91	3717.2	SWT1 RNA endoribonuclease homolog (S. cerevisiae)	Multiple_Complex
1700025G04Rik	NM_197990; ENSMUST00000044581; ENSMUST00000121533; ENSMUST00000128433; BC022177; BC034723; BC055912; NM_197990.3; uc007czd.2; uc007cze.2	TC0100003258.mm.1	71.0124	65.3448	54.9482	60.5477	97.0059	88.0347	101.125	120.259	RIKEN cDNA 1700025G04 gene	Multiple_Complex
Tsen15	NM_025677; ENSMUST00000015124; ENSMUST00000159270; ENSMUST00000159717; ENSMUST00000161717; ENSMUST00000162371; ENSMUST00000163027; BC024342; BC145701; NM_025677.3; OTTMUST00000088597; OTTMUST00000088600; OTTMUST00000088601; OTTMUST00000088602; OTTMUST00000088603; OTTMUST00000088604; uc007czf.2	TC0100003262.mm.1	548.748	560.278	604.668	560.278	112.986	115.36	580.037	207.937	tRNA splicing endonuclease 15 homolog (S. cerevisiae)	Multiple_Complex
Gm15618	ENSMUST00000121610	TC0100003263.mm.1	72.5046	57.68	61.3929	67.1819	40.7859	63.5579	89.8845	69.0706	predicted gene 15618 [Source:MGI Symbol;Acc:MGI:3783063]	Multiple_Complex
Rgl1	NM_016846; ENSMUST00000027760; ENSMUST00000111857; ENSMUST00000111859; ENSMUST00000128251; ENSMUST00000148865; ENSMUST00000149536; BC017678; NM_016846.3; OTTMUST00000053905; OTTMUST00000053906; OTTMUST00000053907; OTTMUST00000053908; OTTMUST00000053994; OTTMUST00000053995; uc007czh.1	TC0100003264.mm.1	41.6429	47.8352	41.6429	42.5179	37.014	40.2244	51.6251	37.7918	ral guanine nucleotide dissociation stimulator,-like 1	Multiple_Complex
Smg7	NM_001005507; NM_001160256; NM_001160257; ENSMUST00000043560; ENSMUST00000073441; ENSMUST00000111836; BC082789; BC086651; NM_001005507.2; NM_001160256.1; NM_001160257.1; uc007czn.1; uc007czo.2; uc007czp.2	TC0100003271.mm.1	3983.99	3125.78	4299.64	4011.71	2091.03	1370.04	5148.73	1858.6	Smg-7 homolog, nonsense mediated mRNA decay factor (C. elegans)	Multiple_Complex
Lamc1	NM_010683; ENSMUST00000027752; ENSMUST00000159251; ENSMUST00000160515; ENSMUST00000161744; ENSMUST00000163011; BC165945; NM_010683.2; OTTMUST00000076764; OTTMUST00000076765; OTTMUST00000076766; OTTMUST00000076767; OTTMUST00000076768; uc007czu.1	TC0100003273.mm.1	38.5859	44.3235	34.7755	36.2523	37.5307	36.2523	34.0598	32	laminin, gamma 1; Synthetic construct Mus musculus clone IMAGE:100066245, MGC:195382 laminin, gamma 1 (Lamc1) mRNA, encodes complete protein.	Multiple_Complex
E330020D12Rik	NR_033736; NR_033736.1; uc007czv.2; uc007czw.2	TC0100003276.mm.1	71.0124	69.0706	77.1717	98.36	101.125	114.563	86.2229	66.257	Riken cDNA E330020D12 gene	Multiple_Complex
Dhx9	NM_007842; ENSMUST00000042141; NM_007842.2; uc007czy.1; uc007czz.1; uc007daa.1; uc007dab.1	TC0100003279.mm.1	5077.84	4770.75	5330.3	4451.27	1351.18	1097.5	1200.98	2385.37	DEAH (Asp-Glu-Ala-His) box polypeptide 9	Multiple_Complex
Rgsl1	NM_001243223; ENSMUST00000124558; ENSMUST00000134030; ENSMUST00000141249; ENSMUST00000145308; ENSMUST00000184095; ENSMUST00000185164; NM_001243223.1; OTTMUST00000051789; OTTMUST00000051790; OTTMUST00000058867; OTTMUST00000073137; OTTMUST00000117295; OTTMUST00000117296; uc007dal.2; uc029quf.1	TC0100003282.mm.1	23.7524	22.9433	25.6342	26.9087	37.2715	51.2685	36.0019	24.761	regulator of G-protein signaling like 1	Multiple_Complex
Teddm2	NM_178243; ENSMUST00000059607; ENSMUST00000123490; BC120491; BC131905; OTTMUST00000084901; OTTMUST00000084902; uc007dam.1	TC0100003283.mm.1	17.5087	17.6305	19.4271	18.1261	21.1121	28.0514	21.259	19.1597	transmembrane epididymal family member 2	Multiple_Complex
Cacna1e	NM_009782; ENSMUST00000004214; BC150750; NM_009782.3; uc007dav.1	TC0100003294.mm.1	20.9663	20.6776	22.6274	22.4711	24.9333	30.6965	26.3549	20.8215	calcium channel, voltage-dependent, R type, alpha 1E subunit	Multiple_Complex
BC034090	ENSMUST00000035914; XM_148974.7; uc007dbe.1	TC0100003302.mm.1	25.2813	26.9087	33.1285	34.0598	59.7141	66.257	35.0174	22.3159	cDNA sequence BC034090	Multiple_Complex
Xpr1	NM_011273; ENSMUST00000027741; ENSMUST00000111774; ENSMUST00000111775; ENSMUST00000129271; ENSMUST00000139925; ENSMUST00000143529; BC153872; BC160346; NM_011273.2; OTTMUST00000053871; OTTMUST00000053872; OTTMUST00000053873; OTTMUST00000053874; OTTMUST00000053875; OTTMUST00000053876; uc007dbf.1; uc007dbg.1; uc007dbh.1	TC0100003304.mm.1	10884.6	10297.5	7332.05	6382.92	3590.58	2646.74	5595.3	10297.5	xenotropic and polytropic retrovirus receptor 1; Synthetic construct Mus musculus clone IMAGE:100064090, MGC:193461 xenotropic and polytropic retrovirus receptor 1 (Xpr1) mRNA, encodes complete protein.	Multiple_Complex
Lhx4; Pdzrn4	NM_010712; ENSMUST00000027740; ENSMUST00000183600; ENSMUST00000184267; BC049834; NM_010712.2; OTTMUST00000103346; OTTMUST00000117045; OTTMUST00000117046; uc007dbn.2	TC0100003308.mm.1	23.1029	26.5382	26.3549	27.0958	34.7755	35.261	30.4844	25.8125	LIM homeobox protein 4; PDZ domain containing RING finger 4	Multiple_Complex
Qsox1	NM_001024945; NM_023268; ENSMUST00000035325; ENSMUST00000111764; ENSMUST00000130701; ENSMUST00000132495; ENSMUST00000140809; ENSMUST00000151368; BC076590; NM_001024945.1; NM_023268.2; OTTMUST00000062568; OTTMUST00000062569; OTTMUST00000062570; OTTMUST00000062675; OTTMUST00000062676; OTTMUST00000062677; uc007dbo.1; uc007dbp.1; uc007dbq.1; uc011wtx.1	TC0100003309.mm.1	352.139	367.093	382.681	372.217	259.574	178.527	237.207	237.207	quiescin Q6 sulfhydryl oxidase 1	Multiple_Complex
Cep350	NM_001039184; ENSMUST00000124495; ENSMUST00000129865; ENSMUST00000132189; ENSMUST00000137330; ENSMUST00000138762; ENSMUST00000146987; NM_001039184.1; OTTMUST00000085691; OTTMUST00000085692; OTTMUST00000085693; OTTMUST00000085694; OTTMUST00000085695; OTTMUST00000085696; uc007dbr.1; uc007dbs.2; uc011wty.1	TC0100003310.mm.1	242.191	247.28	230.72	249	324.034	245.572	284.05	162.017	centrosomal protein 350	Multiple_Complex
Tor1aip1	NM_001160018; NM_001160019; NM_144791; ENSMUST00000027738; ENSMUST00000097527; ENSMUST00000123705; ENSMUST00000124212; ENSMUST00000126448; ENSMUST00000130995; ENSMUST00000136331; ENSMUST00000136397; ENSMUST00000141878; ENSMUST00000141980; ENSMUST00000169241; BC010841; NM_001160018.1; NM_001160019.1; NM_144791.2; OTTMUST00000052168; OTTMUST00000052169; OTTMUST00000052170; OTTMUST00000052171; OTTMU…	TC0100003313.mm.1	604.668	537.455	744.434	786.88	166.572	224.411	78.249	300.246	torsin A interacting protein 1	Multiple_Complex
Tdrd5	NM_001134741; NM_001277730; ENSMUST00000121146; ENSMUST00000141760; ENSMUST00000148277; ENSMUST00000167528; BC099972; NM_001134741.1; OTTMUST00000065358; OTTMUST00000065359; OTTMUST00000065360; OTTMUST00000065361; uc007dcf.3; uc029qui.1; uc029quj.1	TC0100003316.mm.1	191.341	159.786	192.672	194.012	249	196.72	163.144	152.219	tudor domain containing 5	Multiple_Complex
Axdnd1	BC150932; BC172088; OTTMUST00000055453; OTTMUST00000111489; OTTMUST00000111509; OTTMUST00000111510; OTTMUST00000111511; OTTMUST00000111512; OTTMUST00000111513; OTTMUST00000111514; XM_003688771.1; uc007dci.1; uc011wue.1	TC0100003318.mm.1	56.1028	63.1189	50.5626	53.0765	61.3929	60.1295	57.68	54.9482	axonemal dynein light chain domain containing 1	Multiple_Complex
Soat1	NM_009230; ENSMUST00000051396; BC083092; NM_009230.3; uc007dcj.1; uc007dck.1	TC0100003319.mm.1	724.077	792.353	572.051	526.394	445.722	357.054	491.143	464.65	sterol O-acyltransferase 1	Multiple_Complex
Tor3a	NM_023141; ENSMUST00000079625; ENSMUST00000122242; ENSMUST00000150557; ENSMUST00000152604; ENSMUST00000154353; ENSMUST00000156861; BC071216; NM_023141.2; OTTMUST00000051191; OTTMUST00000051192; OTTMUST00000051193; OTTMUST00000051194; OTTMUST00000051195; OTTMUST00000078065; uc011wuh.1; uc007dcn.2; uc007dco.2	TC0100003320.mm.1	202.251	205.074	205.074	195.361	70.0348	86.2229	86.8227	128.89	torsin family 3, member A	Multiple_Complex
Fam20b	NM_145413; ENSMUST00000086153; ENSMUST00000122424; ENSMUST00000147931; BC019381; BC023737; BC024412; BC031473; NM_145413.4; OTTMUST00000073573; OTTMUST00000073578; uc007dcp.1; uc007dcq.1; uc007dcr.1	TC0100003321.mm.1	1074.91	891.444	843.357	916.506	310.834	396.177	382.681	439.586	family with sequence similarity 20, member B	Multiple_Complex
Ralgps2	NM_001159965; NM_001159966; NM_001159967; NM_001159968; NM_023884; NR_027640; ENSMUST00000027886; ENSMUST00000063199; ENSMUST00000171292; ENSMUST00000172057; BC043132; BC052663; NM_001159965.1; NM_001159966.1; NM_001159967.1; NM_001159968.1; NM_023884.4; NR_027640.1; uc007dcs.2; uc007dcu.2; uc007dcv.2; uc007dcw.2; uc007dcx.2; uc007dcy.2; uc007dcz.2; uc007dda.1; uc007ddb.2; uc011wui.1; uc011wuj.1	TC0100003323.mm.1	760.076	694.581	604.668	564.175	867.067	657.114	272.479	873.098	Ral GEF with PH domain and SH3 binding motif 2	Multiple_Complex
Rasal2	NM_177644; ENSMUST00000078308; ENSMUST00000128538; ENSMUST00000129880; ENSMUST00000132699; ENSMUST00000134543; ENSMUST00000139470; ENSMUST00000143080; ENSMUST00000143358; BC120902; NM_177644.5; OTTMUST00000082979; OTTMUST00000082980; OTTMUST00000082981; OTTMUST00000082982; OTTMUST00000082983; OTTMUST00000082984; OTTMUST00000082985; uc007ddg.2; uc007ddh.2	TC0100003328.mm.1	359.538	377.413	442.643	401.707	172.446	168.897	51.2685	222.861	RAS protein activator like 2	Multiple_Complex
Gm6058	ENSMUST00000154261	TC0100003334.mm.1	116.162	101.829	81.0084	101.125	24.4201	35.0174	43.4113	33.5909	predicted gene 6058 [Source:MGI Symbol;Acc:MGI:3648617]	Multiple_Complex
Brinp2	NM_207583; ENSMUST00000004133; BC076572; NM_207583.2; uc007ddp.2; uc007ddq.2	TC0100003338.mm.1	15.7797	16.2234	17.8766	18.507	19.1597	18.7654	18.6357	15.6707	bone morphogenic protein/retinoic acid inducible neural-specific 2	Multiple_Complex
Pappa2; 1600012P17Rik	NM_001085376; ENSMUST00000159860; ENSMUST00000159861; ENSMUST00000159892; ENSMUST00000160206; ENSMUST00000161589; ENSMUST00000177789; NM_001085376.2; OTTMUST00000074130; OTTMUST00000074672; OTTMUST00000074673; OTTMUST00000074717; OTTMUST00000077148; OTTMUST00000111518; XR_104618.1; uc007ddv.1; uc007ddx.1	TC0100003341.mm.1	33.3589	38.0546	41.0696	39.9466	40.5042	40.7859	39.1245	35.5062	pappalysin 2; RIKEN cDNA 1600012P17 gene	Multiple_Complex
4930562F07Rik	NR_038030; NR_038031; NR_038030.1; NR_038031.1; uc007ded.1; uc029quk.1	TC0100003349.mm.1	18.8959	19.0273	17.8766	23.1029	31.3414	26.3549	25.4572	25.9921	RIKEN cDNA 4930562F07 gene	Multiple_Complex
Rabgap1l	NM_001038621; NM_013862; ENSMUST00000028049; ENSMUST00000028052; BC145811; BC145813; NM_001038621.2; NM_013862.5; uc007deh.1; uc007dei.2; uc007dej.2; uc007dek.1	TC0100003352.mm.1	158.683	146.018	116.162	105.42	173.645	129.787	73.0089	182.278	RAB GTPase activating protein 1-like	Multiple_Complex
Dars2	NM_172644; ENSMUST00000035430; ENSMUST00000159922; ENSMUST00000160591; ENSMUST00000160759; ENSMUST00000161748; ENSMUST00000162398; ENSMUST00000162654; BC076606; BC089191; NM_172644.3; OTTMUST00000076822; OTTMUST00000076840; OTTMUST00000076841; OTTMUST00000076842; OTTMUST00000076843; OTTMUST00000076922; OTTMUST00000076923; uc007dey.1; uc007dez.1	TC0100003371.mm.1	133.436	116.162	105.42	99.0442	47.5048	51.9842	75.5835	78.7932	aspartyl-tRNA synthetase 2 (mitochondrial)	Multiple_Complex
Klhl20	NM_001039482; ENSMUST00000111611; ENSMUST00000117467; ENSMUST00000140905; ENSMUST00000145736; ENSMUST00000148952; BC019571; NM_001039482.1; OTTMUST00000052188; OTTMUST00000052189; OTTMUST00000052190; OTTMUST00000052191; OTTMUST00000075516; uc007dff.1; uc007dfg.1; uc007dfh.1; uc007dfi.1	TC0100003372.mm.1	116.97	117.784	115.36	103.968	72.5046	67.6492	66.7178	56.493	kelch-like 20	Multiple_Complex
4930469G21Rik	NM_001195189; NM_001195189.1; uc011wup.1	TC0100003373.mm.1	16.1113	15.5625	15.5625	15.1369	22.9433	37.014	23.5883	20.393	RIKEN cDNA 4930469G21 gene	Multiple_Complex
Prdx6	NM_007453; BC013489; BC061181; NM_007453.3; OTTMUST00000039666; OTTMUST00000039667; OTTMUST00000039668; OTTMUST00000039669; OTTMUST00000039670; OTTMUST00000047466; OTTMUST00000047467	TC0100003374.mm.1	77.7085	73.5167	75.5835	70.5219	54.1917	65.7993	75.0614	76.6386	peroxiredoxin 6	Multiple_Complex
Gm15429	ENSMUST00000180320	TC0100003376.mm.1	2005.85	1978.24	1758.34	1552.09	3281.18	2646.74	1200.98	3444.31	predicted pseudogene 15429	Multiple_Complex
Suco	NM_172645; ENSMUST00000048377; BC138379; NM_172645.2; uc007dft.2	TC0100003380.mm.1	1698.45	1845.76	1478.58	1305.15	1710.26	1488.87	3236.01	2091.03	SUN domain containing ossification factor	Multiple_Complex
4930558K02Rik	NM_001204904; NM_001204905; ENSMUST00000141397; ENSMUST00000162676; NM_001204904.1; NM_001204905.1; uc007dfw.2; uc029qum.1	TC0100003381.mm.1	16.6795	15.8895	18.8959	20.6776	29.0406	29.446	27.2843	20.393	RIKEN cDNA 4930558K02 gene	Multiple_Complex
Dnm3	NM_001038619; NM_172646; ENSMUST00000070330; ENSMUST00000086074; ENSMUST00000159763; ENSMUST00000160173; ENSMUST00000160665; ENSMUST00000161155; ENSMUST00000161539; ENSMUST00000161894; ENSMUST00000162330; BC141143; BC141144; NM_001038619.1; NM_172646.2; OTTMUST00000073026; OTTMUST00000073176; OTTMUST00000073177; OTTMUST00000073178; OTTMUST00000073179; OTTMUST00000073180; OTTMUST00000073181; OTTMU…	TC0100003382.mm.1	44.0173	43.7133	40.5042	42.2243	54.1917	55.7152	32.8996	58.4852	dynamin 3	Multiple_Complex
Mettl13	NM_144877; ENSMUST00000028017; ENSMUST00000159255; ENSMUST00000159316; ENSMUST00000159817; ENSMUST00000161760; ENSMUST00000176220; ENSMUST00000176689; BC014872; NM_144877.1; OTTMUST00000054289; OTTMUST00000054290; OTTMUST00000054291; OTTMUST00000054293; OTTMUST00000103350; OTTMUST00000103351; OTTMUST00000103352; uc007dgh.1; uc007dgi.1; uc007dgj.1; uc011wuq.1	TC0100003393.mm.1	97.6806	112.986	89.8845	81.0084	37.7918	46.5271	45.8866	58.4852	methyltransferase like 13	Multiple_Complex
Prrc2c	NM_001081290; ENSMUST00000028016; ENSMUST00000182149; ENSMUST00000182288; ENSMUST00000182308; ENSMUST00000182331; ENSMUST00000182393; ENSMUST00000182448; ENSMUST00000182535; ENSMUST00000182593; ENSMUST00000182660; ENSMUST00000183011; ENSMUST00000183223; ENSMUST00000183286; NM_001081290.1; OTTMUST00000113960; OTTMUST00000113984; OTTMUST00000113985; OTTMUST00000113986; OTTMUST00000114019; OTTMUST00…	TC0100003397.mm.1	8841.04	9877.98	9026.81	7486.11	2646.74	2194.99	1992	3902.01	proline-rich coiled-coil 2C	Multiple_Complex
Fmo4	NM_144878; ENSMUST00000028014; ENSMUST00000111525; ENSMUST00000140031; ENSMUST00000140274; ENSMUST00000144916; BC106858; BC106859; NM_144878.1; OTTMUST00000050894; OTTMUST00000050895; OTTMUST00000050896; OTTMUST00000050897; uc007dgv.1; uc007dgw.1	TC0100003399.mm.1	38.0546	33.1285	35.261	33.1285	44.9422	63.1189	39.6706	52.3457	flavin containing monooxygenase 4	Multiple_Complex
Fmo1	NM_010231; ENSMUST00000046049; ENSMUST00000111518; ENSMUST00000131058; ENSMUST00000134098; ENSMUST00000136120; ENSMUST00000143902; BC011229; NM_010231.2; OTTMUST00000058842; OTTMUST00000058843; OTTMUST00000058844; OTTMUST00000058845; OTTMUST00000058846; OTTMUST00000058847; uc007dgx.1; uc007dgy.1	TC0100003401.mm.1	24.761	26.5382	23.9176	22.3159	27.2843	30.6965	32.6724	26.3549	flavin containing monooxygenase 1	Multiple_Complex
Fmo2	NM_018881; ENSMUST00000045902; ENSMUST00000111510; ENSMUST00000143123; ENSMUST00000147617; ENSMUST00000156860; BC031415; NM_018881.3; OTTMUST00000059044; OTTMUST00000059045; OTTMUST00000059046; OTTMUST00000059047; OTTMUST00000059048; uc007dgz.1; uc007dha.1; uc007dhb.1	TC0100003402.mm.1	16.6795	17.5087	18.2522	19.0273	23.7524	28.84	27.0958	19.6983	flavin containing monooxygenase 2	Multiple_Complex
Fmo3	NM_008030; ENSMUST00000028010; ENSMUST00000142759; BC148678; NM_008030.1; OTTMUST00000059064; OTTMUST00000059065; uc007dhe.1; uc007dhf.1	TC0100003406.mm.1	40.2244	36.2523	34.2968	40.5042	62.6829	77.7085	54.9482	63.1189	flavin containing monooxygenase 3; Synthetic construct Mus musculus clone IMAGE:100015660, MGC:183393 flavin containing monooxygenase 3 (Fmo3) mRNA, encodes complete protein.	Multiple_Complex
Prrx1	NM_001025570; NM_011127; NM_175686; ENSMUST00000027878; ENSMUST00000075805; ENSMUST00000174098; ENSMUST00000174397; ENSMUST00000183691; BC092372; NM_001025570.1; NM_011127.2; NM_175686.3; OTTMUST00000097460; OTTMUST00000097461; OTTMUST00000097462; OTTMUST00000097463; OTTMUST00000117336; uc007dhh.1; uc007dhi.1; uc007dhk.1	TC0100003409.mm.1	24.59	23.9176	19.2929	22.7848	29.0406	39.9466	20.1122	31.779	paired related homeobox 1	Multiple_Complex
Gorab	NM_178883; ENSMUST00000045138; BC119132; BC119134; NM_178883.5; uc007dhl.1; uc007dhm.1; uc007dhn.1	TC0100003412.mm.1	46.2057	46.2057	40.2244	42.8137	43.7133	53.4456	37.5307	50.2134	golgin, RAB6-interacting	Multiple_Complex
BC055324	NM_201364; ENSMUST00000045876; ENSMUST00000097493; ENSMUST00000159617; ENSMUST00000160926; ENSMUST00000161321; ENSMUST00000162949; BC052855; BC055324; NM_201364.1; uc007dhs.1; uc007dhu.1	TC0100003416.mm.1	1038.29	1082.39	910.175	797.865	191.341	145.009	916.506	1152.06	cDNA sequence BC055324	Multiple_Complex
Blzf1	NM_001160208; NM_001160209; NM_025505; ENSMUST00000027866; ENSMUST00000086032; ENSMUST00000120447; ENSMUST00000124007; ENSMUST00000148884; BC027025; NM_001160208.1; NM_001160209.1; NM_025505.4; OTTMUST00000072775; OTTMUST00000072776; OTTMUST00000072777; OTTMUST00000072778; OTTMUST00000072779; uc007dig.1; uc007dih.1; uc007dii.2	TC0100003421.mm.1	471.136	515.561	410.148	445.722	526.394	442.643	186.108	396.177	basic leucine zipper nuclear factor 1	Multiple_Complex
Tbx19	NM_032005; ENSMUST00000027859; ENSMUST00000160350; ENSMUST00000161144; ENSMUST00000161777; BC120635; BC137731; NM_032005.4; OTTMUST00000088588; OTTMUST00000088589; OTTMUST00000088590; OTTMUST00000088591; uc007diw.1	TC0100003437.mm.1	975.501	1016.93	519.147	382.681	885.286	560.278	2033.85	3191.46	T-box 19	Multiple_Complex
Tiprl	NM_145513; ENSMUST00000043235; ENSMUST00000142191; ENSMUST00000156102; BC002098; BC058250; NM_145513.4; OTTMUST00000073548; OTTMUST00000073549; OTTMUST00000073557; uc007diz.2	TC0100003440.mm.1	5518.27	5873.48	4359.66	3848.29	873.098	765.363	2120.22	5042.77	TIP41, TOR signalling pathway regulator-like (S. cerevisiae)	Multiple_Complex
Dcaf6	NM_028759; ENSMUST00000027856; NM_028759.1; OTTMUST00000095553; uc007djb.2	TC0100003443.mm.1	198.088	202.251	141.044	157.586	292.036	179.769	286.026	300.246	DDB1 and CUL4 associated factor 6	Multiple_Complex
Mpzl1	NM_001001880; NM_001083897; ENSMUST00000068705; ENSMUST00000111435; BC072563; NM_001001880.2; NM_001083897.1; uc007djg.1; uc007djh.1; uc007dji.1	TC0100003449.mm.1	2486.67	3104.19	2210.26	2076.59	3373.43	2194.99	4482.23	2998.45	myelin protein zero-like 1	Multiple_Complex
Rcsd1; Gm19627	NM_001038846; NM_178593; ENSMUST00000040357; ENSMUST00000097474; BC025872; NM_001038846.1; NM_178593.3; XR_104606.1; uc007djj.1; uc007djk.1	TC0100003451.mm.1	28.2465	28.0514	33.1285	29.6508	37.014	37.2715	41.0696	32	RCSD domain containing 1; PREDICTED: predicted gene, 19627 (Gm19627), miscRNA.	Multiple_Complex
Pou2f1	NM_011137; NM_198932; NM_198933; NM_198934; ENSMUST00000027850; ENSMUST00000069609; ENSMUST00000082225; ENSMUST00000111426; ENSMUST00000111427; ENSMUST00000111429; ENSMUST00000159212; ENSMUST00000160260; ENSMUST00000160908; ENSMUST00000176004; ENSMUST00000176101; ENSMUST00000176800; ENSMUST00000176942; ENSMUST00000177358; ENSMUST00000177472; ENSMUST00000184643; ENSMUST00000184799; BC148748; NM_01…	TC0100003457.mm.1	192.672	209.383	132.514	132.514	227.544	184.823	212.306	487.751	POU domain, class 2, transcription factor 1; Synthetic construct Mus musculus clone IMAGE:100015808, MGC:183446 POU domain, class 2, transcription factor 1 (Pou2f1) mRNA, encodes complete protein.	Multiple_Complex
Pogk	NM_001142948; NM_175170; ENSMUST00000079972; ENSMUST00000111411; ENSMUST00000127596; ENSMUST00000128861; ENSMUST00000131487; ENSMUST00000135673; ENSMUST00000148243; ENSMUST00000169324; BC072587; NM_001142948.1; NM_175170.4; OTTMUST00000066482; OTTMUST00000066483; OTTMUST00000066484; OTTMUST00000066549; OTTMUST00000066550; uc007dkn.2; uc007dko.2; uc007dkp.3; uc011wvk.2	TC0100003468.mm.1	43.7133	44.0173	47.8352	46.8507	56.493	54.9482	50.2134	42.2243	pogo transposable element with KRAB domain	Multiple_Complex
Mgst3	NM_025569; ENSMUST00000028005; BC029669; NM_025569.1; OTTMUST00000054194; uc007dky.1	TC0100003483.mm.1	826.001	792.353	1351.18	1858.6	7967.99	7033.37	1520.15	2778.33	microsomal glutathione S-transferase 3	Multiple_Complex
Pbx1	NM_008783; NM_183355; ENSMUST00000064438; ENSMUST00000072863; ENSMUST00000097471; ENSMUST00000176309; ENSMUST00000176482; ENSMUST00000176540; ENSMUST00000176790; ENSMUST00000176791; BC002244; BC058390; NM_008783.2; NM_183355.2; OTTMUST00000104168; OTTMUST00000104169; OTTMUST00000104170; OTTMUST00000104171; OTTMUST00000104172; OTTMUST00000104173; OTTMUST00000104174; OTTMUST00000104175	TC0100003487.mm.1	38.8542	43.7133	38.3193	39.1245	54.5686	50.9143	51.6251	43.1115	pre B cell leukemia homeobox 1; pre B-cell leukemia transcription factor 1	Multiple_Complex
Nuf2	NM_023284; ENSMUST00000028000; ENSMUST00000111368; BC020026; NM_023284.3; uc007dlj.1; uc007dlk.1; uc007dll.1	TC0100003500.mm.1	820.296	792.353	415.873	312.996	393.44	265.028	159.786	1389.16	NUF2, NDC80 kinetochore complex component, homolog (S. cerevisiae)	Multiple_Complex
Rgs4	NM_009062; ENSMUST00000027991; ENSMUST00000111357; ENSMUST00000132567; BC003882; BC055293; NM_009062.3; OTTMUST00000049422; OTTMUST00000049423; OTTMUST00000049424; uc007dln.1	TC0100003502.mm.1	18.8959	22.6274	21.1121	21.1121	26.3549	33.3589	24.0839	22.3159	regulator of G-protein signaling 4	Multiple_Complex
Hsd17b7	NM_010476; ENSMUST00000027989; ENSMUST00000111353; ENSMUST00000123230; ENSMUST00000133563; NM_010476.3; OTTMUST00000049128; OTTMUST00000049129; OTTMUST00000049158; OTTMUST00000049159; uc007dlp.1; uc007dlq.1	TC0100003505.mm.1	263.197	249	138.141	121.095	158.683	141.044	35.7532	276.282	hydroxysteroid (17-beta) dehydrogenase 7	Multiple_Complex
Ddr2	NM_022563; ENSMUST00000027985; ENSMUST00000170800; BC138826; BC138827; NM_022563.2; uc007dlu.2; uc011wvr.1	TC0100003506.mm.1	430.539	372.217	337.794	272.479	224.411	215.269	190.019	308.687	discoidin domain receptor family, member 2	Multiple_Complex
Uap1	NM_133806; ENSMUST00000027981; ENSMUST00000111350; ENSMUST00000111351; ENSMUST00000160848; ENSMUST00000161112; ENSMUST00000161492; ENSMUST00000162253; BC016406; BC017547; NM_133806.4; OTTMUST00000055485; OTTMUST00000055486; OTTMUST00000055487; OTTMUST00000055505; OTTMUST00000055506; OTTMUST00000055507	TC0100003507.mm.1	548.748	548.748	508.463	458.253	142.025	158.683	364.557	436.549	UDP-N-acetylglucosamine pyrophosphorylase 1	Multiple_Complex
Uhmk1	NM_010633; ENSMUST00000027979; ENSMUST00000123399; ENSMUST00000150821; BC058732; NM_010633.3; OTTMUST00000051082; OTTMUST00000051083; OTTMUST00000051085; uc007dma.1	TC0100003508.mm.1	1746.2	1734.13	1060.11	955.426	526.394	266.871	1595.73	2368.9	U2AF homology motif (UHM) kinase 1	Multiple_Complex
Gm6345	XR_104612.1	TC0100003509.mm.1	53.4456	49.5221	46.2057	49.18	59.3016	63.1189	51.2685	51.6251	predicted gene 6345	Multiple_Complex
Nos1ap	NM_001109985; NM_027528; ENSMUST00000159665; ENSMUST00000160456; ENSMUST00000160466; ENSMUST00000160816; ENSMUST00000161485; ENSMUST00000161966; ENSMUST00000162090; ENSMUST00000162709; BC160272; NM_001109985.1; NM_027528.2; OTTMUST00000074045; OTTMUST00000074046; OTTMUST00000074154; OTTMUST00000074155; OTTMUST00000074156; OTTMUST00000074157; OTTMUST00000076093; OTTMUST00000076094; uc007dme.1; uc0…	TC0100003887.mm.1	109.896	125.366	99.0442	92.4115	207.937	172.446	205.074	155.417	nitric oxide synthase 1 (neuronal) adaptor protein; Synthetic construct Mus musculus clone IMAGE:100063920, MGC:193387 nitric oxide synthase 1 (neuronal) adaptor protein (Nos1ap) mRNA, encodes complete protein.	Multiple_Complex
Atf6	NM_001081304; ENSMUST00000027974; ENSMUST00000182787; BC141028; NM_001081304.1; OTTMUST00000114360; OTTMUST00000114361; uc007dmj.1	TC0100003513.mm.1	448.822	455.087	388.023	398.932	421.679	427.565	265.028	533.742	activating transcription factor 6	Multiple_Complex
Fcrla	NM_001160215; NM_145141; NR_027666; ENSMUST00000046322; ENSMUST00000159149; ENSMUST00000159171; ENSMUST00000161050; ENSMUST00000162136; ENSMUST00000162887; BC064708; NM_001160215.1; NM_145141.2; NR_027666.1; OTTMUST00000074170; OTTMUST00000074171; OTTMUST00000077089; OTTMUST00000077090; OTTMUST00000077091; OTTMUST00000077092; uc007dmq.2; uc007dmr.2; uc011wvu.1	TC0100003520.mm.1	19.0273	18.7654	19.8353	20.8215	34.0598	26.3549	31.3414	19.4271	Fc receptor-like A	Multiple_Complex
Fcgr2b	NM_001077189; NM_010187; ENSMUST00000027966; ENSMUST00000081103; ENSMUST00000159688; ENSMUST00000159969; ENSMUST00000160106; ENSMUST00000161503; ENSMUST00000161730; BC038070; NM_001077189.1; NM_010187.2; OTTMUST00000051686; OTTMUST00000051687; OTTMUST00000051688; OTTMUST00000051689; OTTMUST00000051690; OTTMUST00000051691; OTTMUST00000051692; uc007dmu.2; uc007dms.2; uc007dmt.2; uc007dmv.1; uc011wv…	TC0100003522.mm.1	22.3159	19.5622	19.5622	22.9433	20.9663	22.1618	22.3159	21.7057	Fc receptor, IgG, low affinity IIb	Multiple_Complex
Fcgr3	NM_010188; ENSMUST00000164044; ENSMUST00000164179; ENSMUST00000168817; ENSMUST00000169017; BC052819; NM_010188.5; OTTMUST00000089518; OTTMUST00000089519; OTTMUST00000089520; OTTMUST00000089521; uc007dmy.2; uc007dmz.2; uc011wvw.1	TC0100003524.mm.1	2957.17	2646.74	3350.13	4576.41	1120.56	1287.18	803.414	968.763	Fc receptor, IgG, low affinity III	Multiple_Complex
Tomm40l	NM_001037170; ENSMUST00000005817; ENSMUST00000111326; ENSMUST00000111327; ENSMUST00000130529; ENSMUST00000138184; ENSMUST00000143405; ENSMUST00000147246; ENSMUST00000154106; BC058978; NM_001037170.2; OTTMUST00000051242; OTTMUST00000051243; OTTMUST00000051244; OTTMUST00000051245; OTTMUST00000051246; OTTMUST00000051247; OTTMUST00000051248; OTTMUST00000051249; uc007dni.1; uc007dnj.1	TC0100003532.mm.1	24.4201	24.59	27.4741	30.91	40.5042	54.5686	44.3235	26.5382	translocase of outer mitochondrial membrane 40 homolog-like (yeast)	Multiple_Complex
Fcer1g	NM_010185; ENSMUST00000079957; ENSMUST00000150997; BC034163; NM_010185.4; OTTMUST00000050975; OTTMUST00000050976; uc007dnl.1	TC0100003533.mm.1	20.1122	20.8215	19.8353	21.1121	20.9663	26.9087	23.7524	19.8353	Fc receptor, IgE, high affinity I, gamma polypeptide	Multiple_Complex
Ndufs2	NM_153064; ENSMUST00000013737; ENSMUST00000111318; ENSMUST00000131286; ENSMUST00000136976; ENSMUST00000138069; ENSMUST00000150108; BC016097; NM_153064.4; OTTMUST00000051199; OTTMUST00000051200; OTTMUST00000051201; OTTMUST00000051202; OTTMUST00000051203; OTTMUST00000078129; uc007dnm.1; uc011wvz.1	TC0100003534.mm.1	235.568	282.088	278.204	265.028	160.898	133.436	187.403	170.072	NADH dehydrogenase (ubiquinone) Fe-S protein 2	Multiple_Complex
Ppox	NM_008911; ENSMUST00000073120; ENSMUST00000126765; ENSMUST00000133050; ENSMUST00000145019; ENSMUST00000151442; ENSMUST00000152689; ENSMUST00000155083; BC002047; NM_008911.2; OTTMUST00000051129; OTTMUST00000051130; OTTMUST00000051131; OTTMUST00000051132; OTTMUST00000051133; OTTMUST00000051134; OTTMUST00000051135; uc007dns.1	TC0100003536.mm.1	42.8137	47.5048	45.8866	46.2057	46.5271	68.1197	50.2134	38.0546	protoporphyrinogen oxidase	Multiple_Complex
Usp21	NM_013919; ENSMUST00000065941; ENSMUST00000111305; ENSMUST00000111306; ENSMUST00000126557; ENSMUST00000126729; ENSMUST00000127101; ENSMUST00000142656; ENSMUST00000144393; ENSMUST00000147176; ENSMUST00000149187; ENSMUST00000153164; ENSMUST00000174720; BC021903; NM_013919.4; OTTMUST00000051488; OTTMUST00000051489; OTTMUST00000051490; OTTMUST00000051491; OTTMUST00000051492; OTTMUST00000051493; OTTMU…	TC0100003537.mm.1	128.89	128	116.162	108.383	183.546	166.572	203.657	166.572	ubiquitin specific peptidase 21	Multiple_Complex
Ufc1	NM_025388; ENSMUST00000080001; ENSMUST00000111302; ENSMUST00000138974; ENSMUST00000144576; ENSMUST00000152621; BC021936; NM_025388.2; OTTMUST00000051397; OTTMUST00000051398; OTTMUST00000051399; OTTMUST00000051400; OTTMUST00000051401; uc007dnw.1	TC0100003538.mm.1	321.795	270.597	522.758	497.999	150.123	213.783	190.019	168.897	ubiquitin-fold modifier conjugating enzyme 1	Multiple_Complex
Nit1	NM_001242580; NM_012049; ENSMUST00000111289; ENSMUST00000111295; ENSMUST00000111296; ENSMUST00000136339; ENSMUST00000141357; ENSMUST00000146428; ENSMUST00000148339; ENSMUST00000156856; BC021634; NM_001242580.1; NM_012049.2; OTTMUST00000051528; OTTMUST00000051529; OTTMUST00000051530; OTTMUST00000051531; OTTMUST00000051532; OTTMUST00000051533; OTTMUST00000051534; OTTMUST00000051537; uc007doa.2; uc0…	TC0100003541.mm.1	139.102	153.277	132.514	116.97	108.383	90.5097	335.461	97.6806	nitrilase 1	Multiple_Complex
Gm24871; B930036N10Rik; RP23-116M12.2	ENSMUST00000083099; ENSMUST00000165827; ENSMUST00000181170; OTTMUST00000111990	TC0100003545.mm.1	54.1917	56.1028	64.4452	54.9482	66.257	78.7932	33.5909	56.493	predicted gene, 24871 [Source:MGI Symbol;Acc:MGI:5454648]; RIKEN cDNA B930036N10 gene [Source:MGI Symbol;Acc:MGI:3702496]; novel transcript, antisense to Alyref2	Multiple_Complex
Ly9	NM_001277968; NM_008534; NR_102726; ENSMUST00000004827; ENSMUST00000068878; ENSMUST00000111277; ENSMUST00000143463; ENSMUST00000146596; BC095921; NM_008534.2; OTTMUST00000041044; OTTMUST00000050707; OTTMUST00000050708; OTTMUST00000050709; OTTMUST00000050710; uc007dou.1; uc011wwg.1	TC0100003549.mm.1	17.3878	18.1261	20.1122	20.8215	23.9176	26.3549	26.5382	21.5557	lymphocyte antigen 9	Multiple_Complex
Vangl2	NM_033509; ENSMUST00000027837; ENSMUST00000111263; ENSMUST00000111264; ENSMUST00000138714; ENSMUST00000148363; ENSMUST00000153662; BC052195; NM_033509.3; OTTMUST00000051230; OTTMUST00000051231; OTTMUST00000051232; OTTMUST00000051233; OTTMUST00000051234; OTTMUST00000078154; uc007dpi.1; uc011wwi.1	TC0100003558.mm.1	29.2426	30.4844	29.6508	30.0647	40.2244	40.2244	40.7859	30.4844	vang-like 2 (van gogh, Drosophila)	Multiple_Complex
Ncstn	NM_021607; ENSMUST00000003550; ENSMUST00000122986; ENSMUST00000135928; ENSMUST00000140643; ENSMUST00000142825; ENSMUST00000146137; BC019998; NM_021607.3; OTTMUST00000050982; OTTMUST00000050983; OTTMUST00000050984; OTTMUST00000050985; OTTMUST00000050986; OTTMUST00000050987; uc007dpk.2	TC0100003560.mm.1	155.417	172.446	117.784	125.366	206.5	157.586	206.5	424.612	nicastrin	Multiple_Complex
Pea15a	NM_011063; ENSMUST00000013842; ENSMUST00000111247; ENSMUST00000125361; ENSMUST00000152432; ENSMUST00000155109; BC038282; NM_011063.2; OTTMUST00000052554; OTTMUST00000052555; OTTMUST00000052556; OTTMUST00000052557; OTTMUST00000052558; uc007dpy.1	TC0100003563.mm.1	29.0406	27.0958	31.5594	32.6724	25.9921	28.0514	33.3589	34.0598	phosphoprotein enriched in astrocytes 15A	Multiple_Complex
Casq1	NM_009813; ENSMUST00000003554; ENSMUST00000170638; ENSMUST00000170700; BC064057; NM_009813.2; OTTMUST00000089560; OTTMUST00000089561; OTTMUST00000089562; uc007dpz.2; uc007dqa.2	TC0100003564.mm.1	18.6357	18.8959	19.8353	19.1597	23.7524	25.4572	36.2523	20.1122	calsequestrin 1	Multiple_Complex
Atp1a2	NM_178405; ENSMUST00000085913; ENSMUST00000097464; ENSMUST00000131751; ENSMUST00000137679; BC036127; NM_178405.3; OTTMUST00000051816; OTTMUST00000051817; OTTMUST00000051818; OTTMUST00000051819; uc007dqc.1; uc007dqd.1; uc011wwl.1	TC0100003566.mm.1	26.9087	25.9921	30.91	32.2226	39.6706	41.9326	42.8137	29.6508	ATPase, Na+/K+ transporting, alpha 2 polypeptide	Multiple_Complex
Kcnj9	NM_008429; ENSMUST00000062387; BC065161; NM_008429.2; uc007dqg.1; uc007dqh.1; uc007dqi.1	TC0100003568.mm.1	17.0299	16.6795	20.5348	16.7955	24.4201	36.7583	34.2968	18.2522	potassium inwardly-rectifying channel, subfamily J, member 9	Multiple_Complex
Cadm3	NM_053199; ENSMUST00000005470; ENSMUST00000111220; ENSMUST00000126963; ENSMUST00000136540; ENSMUST00000157032; BC115417; BC115418; NM_053199.3; OTTMUST00000059629; OTTMUST00000059630; OTTMUST00000059631; OTTMUST00000059632; OTTMUST00000083363; uc007drh.1; uc007dri.1; uc007drj.1; uc007drk.1	TC0100003587.mm.1	21.7057	21.5557	23.4254	25.2813	32.4467	28.443	28.6408	23.4254	cell adhesion molecule 3	Multiple_Complex
Pydc4	NM_001177349; NM_001177350; ENSMUST00000097462; ENSMUST00000150649; ENSMUST00000178186; ENSMUST00000179648; ENSMUST00000180215; NM_001177349.1; NM_001177350.1; OTTMUST00000085766; OTTMUST00000111666; OTTMUST00000111667; OTTMUST00000111841; OTTMUST00000111842; uc007drq.2; uc011wwt.1	TC0100003591.mm.1	18.2522	17.8766	19.5622	19.2929	23.9176	23.9176	22.7848	19.6983	pyrin domain containing 4	Multiple_Complex
Mnda	NM_001033450; ENSMUST00000009340; BC132314; BC132316; BC145397; NM_001033450.3; uc007drx.1	TC0100003889.mm.1	26.3549	31.125	23.5883	23.5883	25.6342	32	31.779	36.5044	myeloid cell nuclear differentiation antigen	Multiple_Complex
Mndal	NM_001170853; NM_001170853.1; uc007dry.2; uc007drz.2	TC0100003890.mm.1	19.5622	22.0087	21.5557	24.59	27.2843	37.2715	30.4844	23.1029	myeloid nuclear differentiation antigen like	Multiple_Complex
Ifi203	NM_001045481; NM_008328; BC008167; NM_001045481.1; NM_008328.2; OTTMUST00000066681; OTTMUST00000066682; OTTMUST00000066683; OTTMUST00000066684; OTTMUST00000066685; OTTMUST00000066947; OTTMUST00000066948; uc007dsi.2; uc007dsj.1	TC0100003891.mm.1	18.7654	19.0273	22.9433	22.7848	26.5382	31.5594	32	22.4711	interferon activated gene 203 (Ifi203), transcript variant 1, mRNA.; interferon activated gene 203 (Ifi203), transcript variant 2, mRNA.; interferon activated gene 203	Multiple_Complex
Rgs7	NM_001199003; NM_011880; ENSMUST00000027812; BC051133; NM_001199003.1; NM_011880.3; uc007dtg.2; uc007dth.2; uc007dti.2; uc007dtj.2; uc007dtk.2; uc007dtl.2	TC0100003604.mm.1	29.8571	32.4467	27.2843	29.446	50.9143	54.9482	33.3589	44.0173	regulator of G protein signaling 7	Multiple_Complex
Fh1	NM_010209; ENSMUST00000027810; ENSMUST00000130996; ENSMUST00000133218; ENSMUST00000154956; ENSMUST00000176740; BC006048; NM_010209.2; OTTMUST00000062946; OTTMUST00000062956; OTTMUST00000062957; OTTMUST00000062958; OTTMUST00000111211; uc007dtn.2	TC0100003610.mm.1	107.635	113.772	103.968	98.36	143.013	138.141	118.603	143.013	fumarate hydratase 1	Multiple_Complex
Chml	NM_021350; ENSMUST00000104984; BC118932; NM_021350.2; OTTMUST00000050916; uc007dtr.2	TC0100003612.mm.1	337.794	413.001	455.087	308.687	227.544	257.781	694.581	312.996	choroideremia-like	Multiple_Complex
Pld5	NM_001195816; NM_176916; ENSMUST00000065967; ENSMUST00000111166; ENSMUST00000111167; ENSMUST00000125404; ENSMUST00000144340; ENSMUST00000156184; BC100428; NM_001195816.1; NM_176916.4; OTTMUST00000059102; OTTMUST00000059164; OTTMUST00000059165; OTTMUST00000059166; OTTMUST00000059182; OTTMUST00000059183; uc007dtv.2; uc007dtw.1; uc007dtx.1; uc007dtz.2	TC0100003614.mm.1	24.761	24.4201	24.761	26.1729	24.761	26.9087	26.1729	24.2515	phospholipase D family, member 5	Multiple_Complex
Adss	NM_007422; ENSMUST00000016105; ENSMUST00000159184; ENSMUST00000161808; BC139404; BC139417; NM_007422.3; OTTMUST00000088544; OTTMUST00000088545; OTTMUST00000088546; uc007dus.1; uc007dut.1; uc007duu.1	TC0100003639.mm.1	4359.66	4124.49	2977.74	2452.44	3147.52	1978.24	8079.22	6888.62	adenylosuccinate synthetase, non muscle	Multiple_Complex
Hnrnpu	NM_016805; ENSMUST00000037748; ENSMUST00000134291; ENSMUST00000146362; ENSMUST00000150825; ENSMUST00000162916; BC018353; NM_016805.2; OTTMUST00000051942; OTTMUST00000051943; OTTMUST00000051944; OTTMUST00000051945; OTTMUST00000088549; OTTMUST00000088550; uc007dvb.2; uc011wxl.1	TC0100003645.mm.1	1168.14	1184.45	1038.29	855.13	270.597	213.783	903.888	792.353	heterogeneous nuclear ribonucleoprotein U	Multiple_Complex
Smyd3	NM_027188; ENSMUST00000068437; ENSMUST00000111134; ENSMUST00000125756; ENSMUST00000128302; ENSMUST00000129393; ENSMUST00000131684; BC052431; BC061485; NM_027188.3; OTTMUST00000041394; OTTMUST00000041395; OTTMUST00000041396; OTTMUST00000041397; OTTMUST00000041398; OTTMUST00000041399; uc007dvj.1; uc007dvk.1	TC0100003649.mm.1	194.012	219.793	170.072	163.144	80.4489	89.8845	87.4266	142.025	SET and MYND domain containing 3	Multiple_Complex
Gm5561	ENSMUST00000178932	TC0100003656.mm.1	9216.48	8599.28	9345.14	10085.5	1937.53	1758.34	3640.7	4269.94	predicted gene 5561 [Source:MGI Symbol;Acc:MGI:3804971]	Multiple_Complex
Tfb2m	NM_008249; ENSMUST00000027769; ENSMUST00000129009; ENSMUST00000129982; ENSMUST00000139993; ENSMUST00000150778; BC138836; BC138837; NM_008249.4; OTTMUST00000054001; OTTMUST00000054002; OTTMUST00000054003; OTTMUST00000054004; OTTMUST00000054005; uc007dvl.1; uc011wxm.1	TC0100003657.mm.1	7281.4	7033.37	5914.33	4837.35	995.999	760.076	4067.71	4904.87	transcription factor B2, mitochondrial	Multiple_Complex
Ahctf1	NM_026375; ENSMUST00000027768; ENSMUST00000125816; ENSMUST00000127250; ENSMUST00000140489; ENSMUST00000145968; ENSMUST00000147137; ENSMUST00000151734; BC138343; BC138344; NM_026375.2; OTTMUST00000085085; OTTMUST00000085086; OTTMUST00000085087; OTTMUST00000085088; OTTMUST00000085089; OTTMUST00000085090; OTTMUST00000085091; uc007dvq.1; uc011wxn.1	TC0100003893.mm.1	7967.99	8719.32	8539.88	6793.79	2592.27	1951	1710.26	5792.62	AT hook containing transcription factor 1	Multiple_Complex
Adck3	NM_001163290; NM_023341; ENSMUST00000027766; ENSMUST00000159591; ENSMUST00000159914; ENSMUST00000160102; ENSMUST00000160121; ENSMUST00000160169; ENSMUST00000160482; ENSMUST00000160879; ENSMUST00000161300; ENSMUST00000161379; ENSMUST00000161632; ENSMUST00000161743; ENSMUST00000161746; ENSMUST00000161814; ENSMUST00000162725; ENSMUST00000162769; ENSMUST00000170472; BC030937; NM_001163290.1; NM_02334…	TC0100003662.mm.1	75.5835	73.5167	80.4489	80.4489	56.493	64.4452	71.0124	47.8352	aarF domain containing kinase 3	Multiple_Complex
Psen2	NM_001128605; NM_011183; ENSMUST00000010753; ENSMUST00000111104; ENSMUST00000111105; ENSMUST00000111106; ENSMUST00000111108; ENSMUST00000128223; ENSMUST00000130029; ENSMUST00000130711; ENSMUST00000133340; ENSMUST00000136291; ENSMUST00000149590; BC010403; NM_001128605.1; NM_011183.3; OTTMUST00000050924; OTTMUST00000050925; OTTMUST00000050926; OTTMUST00000050927; OTTMUST00000050928; OTTMUST00000050…	TC0100003664.mm.1	43.4113	48.1679	42.2243	49.5221	60.5477	71.5064	53.8174	52.3457	presenilin 2	Multiple_Complex
Gm5069	NR_003623; uc007dwf.1	TC0100003665.mm.1	26.1729	24.0839	30.6965	22.3159	28.84	37.014	36.2523	27.6652	glyceraldehyde-3-phosphate dehydrogenase pseudogene	Multiple_Complex
H3f3a	NM_008210; BC002268; BC012687; BC083353; BC088835; BC106177; NM_008210.4; OTTMUST00000051055; OTTMUST00000051056; OTTMUST00000051057; OTTMUST00000051058; OTTMUST00000051059; OTTMUST00000075153; OTTMUST00000075154; uc007dwr.1; uc007dws.1	TC0100003671.mm.1	1234.75	1112.82	1152.06	1082.39	501.463	461.44	652.575	989.119	H3 histone, family 3A	Multiple_Complex
Nvl	NM_026171; ENSMUST00000027797; BC031847; NM_026171.1; uc007dxb.1; uc007dxc.1; uc007dxd.1	TC0100003682.mm.1	1937.53	1710.26	1573.76	1296.13	319.573	237.207	1351.18	1795.29	nuclear VCP-like	Multiple_Complex
Wdr26	NM_145514; ENSMUST00000036329; ENSMUST00000159290; ENSMUST00000159625; ENSMUST00000159673; ENSMUST00000159698; ENSMUST00000161531; ENSMUST00000162819; ENSMUST00000162963; BC139336; BC139337; NM_145514.5; OTTMUST00000088630; OTTMUST00000088631; OTTMUST00000088632; OTTMUST00000088633; OTTMUST00000088634; OTTMUST00000088635; OTTMUST00000088636; OTTMUST00000088637; uc007dxf.2; uc007dxg.2	TC0100003683.mm.1	2836.7	2856.44	2702.35	2665.15	2646.74	2149.82	1734.13	2592.27	WD repeat domain 26	Multiple_Complex
Gm16547	ENSMUST00000159474	TC0100003687.mm.1	86.2229	91.7731	96.3358	88.647	79.3413	130.69	54.9482	63.1189	predicted gene 16547 [Source:MGI Symbol;Acc:MGI:4414967]	Multiple_Complex
Enah	NM_001083120; NM_001083121; NM_008680; NM_010135; ENSMUST00000078719; ENSMUST00000111024; ENSMUST00000111025; ENSMUST00000111030; ENSMUST00000177811; BC062927; NM_001083120.1; NM_001083121.1; NM_008680.2; NM_010135.2; uc007dxp.1; uc007dxq.1; uc007dxr.1; uc007dxs.1; uc007dxt.1	TC0100003700.mm.1	1002.93	1128.35	968.763	929.3	1038.29	929.3	2352.53	1168.14	enabled homolog (Drosophila)	Multiple_Complex
Degs1	NM_007853; ENSMUST00000035295; ENSMUST00000132551; ENSMUST00000133052; BC003751; NM_007853.4; OTTMUST00000051340; OTTMUST00000051341; OTTMUST00000051342; uc007dxw.1; uc007dxx.1	TC0100003709.mm.1	254.232	227.544	218.275	196.72	192.672	168.897	237.207	259.574	degenerative spermatocyte homolog 1 (Drosophila)	Multiple_Complex
Fbxo28	NM_175127; ENSMUST00000051431; BC094542; NM_175127.2; uc007dya.1; uc007dyb.1	TC0100003710.mm.1	237.207	238.856	184.823	132.514	188.706	144.007	113.772	235.568	F-box protein 28	Multiple_Complex
Mia3	NM_177389; NM_177389.3; uc008icw.1; uc008icx.1; uc008icy.1; uc012bon.1	TC0100003725.mm.1	98.36	115.36	75.5835	73.0089	69.0706	66.7178	46.8507	108.383	melanoma inhibitory activity 3	Multiple_Complex
Marc2	NM_133684; ENSMUST00000068725; ENSMUST00000159293; ENSMUST00000160318; ENSMUST00000160982; ENSMUST00000161341; ENSMUST00000161359; ENSMUST00000161821; ENSMUST00000162261; ENSMUST00000162501; ENSMUST00000162866; BC006888; NM_133684.3; OTTMUST00000088656; OTTMUST00000088657; OTTMUST00000088658; OTTMUST00000088659; OTTMUST00000088660; OTTMUST00000088661; OTTMUST00000088662; OTTMUST00000088663; OTTMU…	TC0100003739.mm.1	230.72	229.126	212.306	174.853	73.5167	69.551	342.509	278.204	mitochondrial amidoxime reducing component 2	Multiple_Complex
Mark1	NM_145515; ENSMUST00000027929; BC112400; NM_145515.2; uc007dyt.2; uc011wxy.1	TC0100003743.mm.1	64.8934	59.7141	56.1028	54.9482	40.2244	38.3193	39.9466	32.2226	MAP/microtubule affinity regulating kinase 1; MAP/microtubule affinity-regulating kinase 1	Multiple_Complex
Iars2	NM_198653; ENSMUST00000027921; ENSMUST00000110974; ENSMUST00000110975; ENSMUST00000131770; ENSMUST00000153211; BC052403; NM_198653.2; OTTMUST00000051852; OTTMUST00000051853; OTTMUST00000051854; OTTMUST00000051855; OTTMUST00000051856; uc007dyy.1; uc007dyz.1; uc007dza.1; uc007dzb.1	TC0100003747.mm.1	38.8542	37.014	32	35.7532	34.5353	32	32.6724	35.7532	isoleucine-tRNA synthetase 2, mitochondrial	Multiple_Complex
9630028B13Rik	NR_038006; BC147657; NR_038006.1; uc007dzi.1	TC0100003749.mm.1	20.5348	29.6508	25.2813	24.761	36.0019	57.68	33.3589	30.2738	RIKEN cDNA 9630028B13 gene	Multiple_Complex
Rrp15	NM_026041; ENSMUST00000001339; ENSMUST00000162336; BC006787; NM_026041.2; OTTMUST00000088735; OTTMUST00000088736; uc007dzq.2	TC0100003757.mm.1	326.288	230.72	233.941	227.544	80.4489	78.249	195.361	168.897	ribosomal RNA processing 15 homolog (S. cerevisiae)	Multiple_Complex
Spata17	NM_028848; NM_029067; ENSMUST00000027908; ENSMUST00000110945; ENSMUST00000183469; ENSMUST00000183656; ENSMUST00000183819; ENSMUST00000183931; ENSMUST00000183996; ENSMUST00000184543; BC089520; NM_028848.3; NM_029067.1; OTTMUST00000055330; OTTMUST00000055390; OTTMUST00000055391; OTTMUST00000055392; OTTMUST00000055393; OTTMUST00000117173; OTTMUST00000117175; uc007dzt.2; uc007dzv.1; uc007dzw.2	TC0100003761.mm.1	23.1029	18.6357	21.259	21.4068	28.443	35.261	26.5382	21.1121	spermatogenesis associated 17	Multiple_Complex
Gm15508	ENSMUST00000160330	TC0100003762.mm.1	13.3614	13.1775	15.5625	15.3482	17.3878	20.8215	13.737	17.7531	predicted gene 15508 [Source:MGI Symbol;Acc:MGI:3782956]	Multiple_Complex
Kctd3	NM_172650; ENSMUST00000085678; BC079581; NM_172650.2; uc007eai.1; uc007eaj.1; uc011wyi.1; uc029qve.1	TC0100003776.mm.1	2352.53	2486.67	1924.14	1640.59	5404.7	2998.45	1722.16	3019.3	potassium channel tetramerisation domain containing 3	Multiple_Complex
Cenpf	NM_001081363; ENSMUST00000165663; ENSMUST00000165798; ENSMUST00000165962; ENSMUST00000171929; NM_001081363.2; OTTMUST00000089577; OTTMUST00000089578; OTTMUST00000089579; OTTMUST00000089580; uc007eao.2; uc007eaq.1	TC0100003783.mm.1	1448.15	1408.55	843.357	729.114	491.143	374.806	625.992	739.292	centromere protein F	Multiple_Complex
Smyd2	NM_026796; ENSMUST00000027897; ENSMUST00000130804; ENSMUST00000132289; ENSMUST00000144452; BC023119; NM_026796.1; OTTMUST00000041402; OTTMUST00000041403; OTTMUST00000041404; OTTMUST00000050715; uc011wym.1; uc007eax.1; uc007eay.1; uc007eaz.1	TC0100003786.mm.1	56.493	51.2685	51.6251	53.0765	55.3304	48.8403	43.4113	58.892	SET and MYND domain containing 2	Multiple_Complex
Prox1	NM_008937; ENSMUST00000010319; ENSMUST00000175916; ENSMUST00000177288; BC051411; NM_008937.2; OTTMUST00000104400; OTTMUST00000104401; OTTMUST00000104402; uc007ebb.2; uc007ebc.1	TC0100003791.mm.1	24.9333	22.4711	23.5883	22.7848	43.7133	36.0019	40.2244	23.2636	prospero homeobox 1; prospero-related homeobox 1; prospero-related homeobox 1 (Prox1), mRNA.	Multiple_Complex
Rps6kc1	NM_178775; ENSMUST00000061611; ENSMUST00000159066; ENSMUST00000159367; ENSMUST00000159624; ENSMUST00000159823; ENSMUST00000160889; ENSMUST00000160891; ENSMUST00000162500; ENSMUST00000162692; BC058403; NM_178775.4; OTTMUST00000088705; OTTMUST00000088706; OTTMUST00000088707; OTTMUST00000088709; OTTMUST00000088710; OTTMUST00000088711; OTTMUST00000088712; OTTMUST00000088713; OTTMUST00000088714; uc007…	TC0100003795.mm.1	26.3549	28.2465	28.2465	26.7228	33.3589	38.0546	31.5594	25.1067	ribosomal protein S6 kinase polypeptide 1	Multiple_Complex
Vash2	NM_144879; NR_027352; ENSMUST00000047409; ENSMUST00000166139; BC024141; NM_144879.2; NR_027352.1; uc007ebr.2; uc007ebs.2	TC0100003796.mm.1	19.0273	20.8215	22.9433	23.2636	29.446	32	24.9333	21.259	vasohibin 2	Multiple_Complex
Mfsd7b	NM_001081259; ENSMUST00000085635; BC157992; BC172689; NM_001081259.1; uc007ebt.1; uc007ebu.1; uc007ebv.1; uc011wyn.1	TC0100003797.mm.1	584.071	533.742	344.892	296.112	62.2499	74.5429	75.0614	186.108	major facilitator superfamily domain containing 7B; Synthetic construct Mus musculus clone IMAGE:100069497, MGC:199399 major facilitator superfamily domain containing 7B (Mfsd7b) mRNA, encodes complete protein.	Multiple_Complex
Tatdn3	NM_001163421; NM_001163422; NM_026895; ENSMUST00000027945; ENSMUST00000085633; ENSMUST00000110891; ENSMUST00000110893; ENSMUST00000124497; ENSMUST00000143876; ENSMUST00000153757; ENSMUST00000156341; ENSMUST00000156527; NM_001163421.1; NM_001163422.1; NM_026895.1; OTTMUST00000051108; OTTMUST00000051109; OTTMUST00000051110; OTTMUST00000051111; OTTMUST00000051112; OTTMUST00000051113; OTTMUST00000051…	TC0100003799.mm.1	661.685	724.077	1144.1	1200.98	330.842	455.087	1038.29	849.223	TatD DNase domain containing 3	Multiple_Complex
Atf3	NM_007498; ENSMUST00000027941; ENSMUST00000131854; BC019946; BC064799; NM_007498.3; OTTMUST00000050734; OTTMUST00000050735; uc007ece.1; uc011wys.1; uc011wyt.1	TC0100003804.mm.1	28.2465	26.7228	30.6965	29.6508	61.8199	36.7583	44.6318	53.8174	activating transcription factor 3	Multiple_Complex
Ppp2r5a	NM_144880; ENSMUST00000067976; BC059026; NM_144880.4; uc007eci.1	TC0100003806.mm.1	326.288	328.557	315.173	347.291	280.139	182.278	123.64	221.322	protein phosphatase 2, regulatory subunit B, alpha; protein phosphatase 2, regulatory subunit B (B56), alpha isoform; protein phosphatase 2, regulatory subunit B', alpha	Multiple_Complex
Dtl	NM_029766; ENSMUST00000027933; NM_029766.2	TC0100003814.mm.1	7858.29	7231.1	5832.91	4837.35	1009.9	1045.52	2977.74	4705.07	denticleless homolog (Drosophila)	Multiple_Complex
1700034H15Rik	NR_030669; NR_030669.1; uc007eda.1; uc007edb.2	TC0100003820.mm.1	151.167	152.219	191.341	194.012	64	74.5429	60.5477	86.8227	RIKEN cDNA 1700034H15 gene	Multiple_Complex
Rcor3	NM_144814; ENSMUST00000073279; ENSMUST00000110849; BC057141; BC138938; BC138939; NM_144814.2	TC0100003826.mm.1	48.5029	54.5686	46.2057	48.8403	48.8403	52.7098	40.7859	82.1393	REST corepressor 3	Multiple_Complex
Hhat	NM_144881; ENSMUST00000044190; ENSMUST00000123721; ENSMUST00000128619; ENSMUST00000154203; ENSMUST00000154755; BC008159; NM_144881.4; OTTMUST00000067019; OTTMUST00000067020; OTTMUST00000067021; OTTMUST00000067022; OTTMUST00000067232; uc007edp.2; uc007edq.2	TC0100003827.mm.1	34.2968	33.8246	34.2968	32.8996	36.7583	39.6706	36.2523	33.1285	hedgehog acyltransferase	Multiple_Complex
Sertad4	NM_001177794; NM_198247; ENSMUST00000016406; ENSMUST00000125391; ENSMUST00000155503; ENSMUST00000155579; BC060251; NM_001177794.1; NM_198247.2; OTTMUST00000066794; OTTMUST00000066887; OTTMUST00000066888; uc007eds.2; uc011wyx.1	TC0100003830.mm.1	20.5348	21.8566	22.3159	23.5883	23.4254	31.125	25.8125	23.1029	SERTA domain containing 4	Multiple_Complex
Diexf	NM_145415; ENSMUST00000085555; BC019218; NM_145415.2; uc007edw.1; uc011wyz.1	TC0100003834.mm.1	776.047	739.292	699.413	639.145	302.334	243.875	173.645	537.455	digestive organ expansion factor homolog (zebrafish)	Multiple_Complex
Traf3ip3	NM_153137; ENSMUST00000043550; ENSMUST00000159666; ENSMUST00000159805; ENSMUST00000160302; ENSMUST00000160332; ENSMUST00000160397; ENSMUST00000161145; ENSMUST00000161151; ENSMUST00000161367; ENSMUST00000161403; ENSMUST00000162480; ENSMUST00000162905; BC137605; BC171933; NM_153137.4; OTTMUST00000066950; OTTMUST00000066951; OTTMUST00000066952; OTTMUST00000066953; OTTMUST00000066954; OTTMUST00000066…	TC0100003835.mm.1	21.259	22.1618	24.0839	23.4254	29.2426	37.7918	30.6965	23.7524	TRAF3 interacting protein 3	Multiple_Complex
Hsd11b1	NM_001044751; NM_008288; ENSMUST00000016338; ENSMUST00000159644; ENSMUST00000160929; ENSMUST00000161406; ENSMUST00000161737; ENSMUST00000162842; BC132364; BC138780; BC145415; NM_001044751.1; NM_008288.2; OTTMUST00000075988; OTTMUST00000075989; OTTMUST00000075990; OTTMUST00000075991; OTTMUST00000075992; OTTMUST00000079283; uc007eef.1; uc007eeg.1; uc007eeh.1	TC0100003836.mm.1	27.4741	24.2515	26.9087	28.84	35.5062	37.5307	45.5696	31.5594	hydroxysteroid 11-beta dehydrogenase 1	Multiple_Complex
Camk1g	NM_144817; ENSMUST00000016323; ENSMUST00000163202; ENSMUST00000165718; ENSMUST00000167700; ENSMUST00000169907; BC021840; NM_144817.2; OTTMUST00000091732; OTTMUST00000091733; OTTMUST00000091734; OTTMUST00000091735; OTTMUST00000091736; uc007eel.1	TC0100003840.mm.1	20.8215	21.8566	23.1029	22.7848	26.7228	30.2738	25.9921	23.4254	calcium/calmodulin-dependent protein kinase I gamma	Multiple_Complex
Mir205	NR_029592; NR_029592.1; uc011wzc.1	TC0100003841.mm.1	14.723	14.8254	16.4498	13.1775	17.1484	15.0324	21.5557	14.5203	microRNA 205	Multiple_Complex
Cd46	NM_010778; ENSMUST00000016637; ENSMUST00000159563; ENSMUST00000160817; ENSMUST00000161772; ENSMUST00000162614; ENSMUST00000162650; ENSMUST00000162951; BC150660; NM_010778.3; OTTMUST00000088873; OTTMUST00000088874; OTTMUST00000088875; OTTMUST00000088876; OTTMUST00000088877; OTTMUST00000088878; OTTMUST00000088879; uc007eet.1; uc011wzh.1	TC0100003853.mm.1	27.8576	26.9087	28.6408	28.2465	35.0174	43.4113	34.5353	26.3549	CD46 antigen, complement regulatory protein	Multiple_Complex
Cr2	NM_007758; ENSMUST00000082321; BC109344; NM_007758.2; uc007eey.1; uc007eez.1; uc007efa.1; uc011wzi.1	TC0100003856.mm.1	19.5622	22.9433	24.2515	24.0839	25.2813	29.446	29.2426	21.8566	complement receptor 2	Multiple_Complex
Nmt2	NM_008708; ENSMUST00000081932; ENSMUST00000091504; ENSMUST00000102989; ENSMUST00000155761; BC037647; NM_008708.1; OTTMUST00000025232; OTTMUST00000025233; OTTMUST00000025234; OTTMUST00000025235	TC0200000004.mm.1	613.109	639.145	556.408	494.559	354.588	324.034	533.742	916.506	N-myristoyltransferase 2	Multiple_Complex
Dclre1c	NM_001110214; NM_146114; NM_175683; ENSMUST00000061852; ENSMUST00000100463; ENSMUST00000102988; ENSMUST00000115066; ENSMUST00000129657; ENSMUST00000131433; ENSMUST00000132565; ENSMUST00000146027; ENSMUST00000152468; BC108935; NM_001110214.1; NM_146114.3; NM_175683.4; OTTMUST00000025189; OTTMUST00000025190; OTTMUST00000025191; OTTMUST00000025192; OTTMUST00000025193; OTTMUST00000025194; OTTMUST0000…	TC0200000006.mm.1	312.996	364.557	464.65	533.742	97.0059	108.383	77.1717	76.6386	DNA cross-link repair 1C, PSO2 homolog (S. cerevisiae)	Multiple_Complex
Phxr1	BC119608; BC119609; XR_140483.1; uc008iec.1	TC0200000007.mm.1	70.5219	58.892	61.8199	63.1189	27.0958	25.8125	38.0546	28.0514	per-hexamer repeat gene 1; PREDICTED: per-hexamer repeat gene 1 (Phxr1), miscRNA.	Multiple_Complex
Cdnf	NM_177647; ENSMUST00000036350; ENSMUST00000132566; ENSMUST00000140610; BC110560; NM_177647.4; OTTMUST00000025227; OTTMUST00000025228; OTTMUST00000025229; uc008iej.1	TC0200000009.mm.1	27.4741	26.1729	24.761	29.6508	36.2523	24.9333	37.5307	27.8576	cerebral dopamine neurotrophic factor	Multiple_Complex
Gm13186	ENSMUST00000118031	TC0200000011.mm.1	968.763	873.098	1052.79	1287.18	265.028	256	333.144	1045.52	predicted gene 13186 [Source:MGI Symbol;Acc:MGI:3649441]	Multiple_Complex
Frmd4a	NM_001177843; NM_001177844; NM_172475; ENSMUST00000075767; ENSMUST00000091497; ENSMUST00000115037; ENSMUST00000115039; ENSMUST00000123919; ENSMUST00000132710; ENSMUST00000137809; ENSMUST00000138735; ENSMUST00000141746; ENSMUST00000142452; ENSMUST00000147156; ENSMUST00000153160; ENSMUST00000175669; ENSMUST00000175944; ENSMUST00000176803; ENSMUST00000176828; ENSMUST00000176864; ENSMUST00000176962; …	TC0200000019.mm.1	26.7228	29.0406	27.8576	26.7228	40.7859	37.5307	30.0647	27.0958	FERM domain containing 4A	Multiple_Complex
Bend7	NM_001190400; NM_178663; ENSMUST00000056914; ENSMUST00000115022; ENSMUST00000138322; ENSMUST00000184139; BC096430; BC119370; BC144864; NM_001190400.1; NM_178663.4; OTTMUST00000025073; OTTMUST00000025074; OTTMUST00000025075; OTTMUST00000025076; uc008iey.2; uc008iez.2; uc008ifa.2; uc012bou.1	TC0200000033.mm.1	25.9921	25.4572	24.0839	25.1067	33.1285	37.7918	33.1285	23.7524	BEN domain containing 7	Multiple_Complex
Sephs1	NM_175400; ENSMUST00000027973; ENSMUST00000115019; ENSMUST00000140045; ENSMUST00000144565; BC065165; BC066037; NM_175400.6; OTTMUST00000025291; OTTMUST00000025292; OTTMUST00000025293; OTTMUST00000025294; uc008ifb.1; uc008ifc.1	TC0200000036.mm.1	522.758	487.751	421.679	340.144	96.3358	91.7731	74.5429	380.038	selenophosphate synthetase 1	Multiple_Complex
Phyh	NM_010726; ENSMUST00000027975; ENSMUST00000128738; ENSMUST00000146933; BC002018; NM_010726.2; OTTMUST00000025296; OTTMUST00000025297; OTTMUST00000025298; uc008ifd.2	TC0200000037.mm.1	385.343	385.343	335.461	312.996	129.787	86.8227	186.108	333.144	phytanoyl-CoA hydroxylase	Multiple_Complex
Gm13194	XM_355309.6	TC0200000038.mm.1	613.109	643.591	675.588	754.826	352.139	367.093	568.1	344.892	predicted gene 13194	Multiple_Complex
Ucma	NM_001113558; NM_001165932; NM_026754; ENSMUST00000027978; ENSMUST00000115010; ENSMUST00000127282; ENSMUST00000167607; BC115608; BC115609; NM_001113558.2; NM_001165932.1; NM_026754.3; OTTMUST00000025299; OTTMUST00000025300; OTTMUST00000025301; uc008ife.2; uc008iff.2; uc012bov.1; uc012bow.1	TC0200000040.mm.1	42.2243	36.5044	40.7859	38.0546	54.1917	51.9842	56.493	39.6706	upper zone of growth plate and cartilage matrix associated	Multiple_Complex
Gm13197	ENSMUST00000117204	TC0200000050.mm.1	52.3457	48.5029	54.9482	65.7993	82.7106	63.1189	58.892	39.9466	predicted gene 13197 [Source:MGI Symbol;Acc:MGI:3652146]	Multiple_Complex
Mir466d	NR_030601; uc029tvp.1	TC0200000051.mm.1	192.672	261.379	233.941	254.232	216.767	219.793	222.861	173.645	microRNA 466d	Multiple_Complex
Nudt5	NM_016918; ENSMUST00000026927; ENSMUST00000127116; ENSMUST00000128604; ENSMUST00000138549; ENSMUST00000179748; BC004571; BC049595; NM_016918.3; OTTMUST00000025460; OTTMUST00000025461; OTTMUST00000025462; OTTMUST00000025463; uc008ifv.1	TC0200000055.mm.1	92.4115	83.2859	70.5219	70.5219	106.891	92.4115	372.217	284.05	nudix (nucleoside diphosphate linked moiety X)-type motif 5	Multiple_Complex
Upf2	NM_001081132; ENSMUST00000060092; ENSMUST00000128200; ENSMUST00000144901; BC138358; BC138359; NM_001081132.1; OTTMUST00000026301; OTTMUST00000026302; OTTMUST00000027851; uc008igc.1; uc008igd.1	TC0200000057.mm.1	680.287	685.019	621.668	564.175	333.144	249	105.42	508.463	UPF2 regulator of nonsense transcripts homolog (yeast)	Multiple_Complex
Usp6nl	NM_001080548; NM_181399; ENSMUST00000042503; ENSMUST00000114937; ENSMUST00000132391; ENSMUST00000150515; NM_001080548.1; NM_181399.3; OTTMUST00000027675; OTTMUST00000027676; OTTMUST00000027677; OTTMUST00000027678; uc008igk.1; uc008igl.1	TC0200000060.mm.1	224.411	215.269	184.823	168.897	238.856	173.645	81.0084	337.794	USP6 N-terminal like	Multiple_Complex
Gm13255	ENSMUST00000117255	TC0200000071.mm.1	13.1775	11.5514	10.8528	11.8762	19.6983	22.1618	17.5087	12.996	predicted gene 13255 [Source:MGI Symbol;Acc:MGI:3652189]	Multiple_Complex
Gm13220	ENSMUST00000121535	TC0200000075.mm.1	12.8171	13.4543	17.5087	15.5625	17.5087	31.779	23.7524	23.4254	predicted gene 13220 [Source:MGI Symbol;Acc:MGI:3651907]	Multiple_Complex
4930412O13Rik	NR_024257; NR_024257.1; uc008ihh.2	TC0200000079.mm.1	34.7755	38.8542	38.3193	38.3193	45.5696	66.7178	47.1766	35.7532	RIKEN cDNA 4930412O13 gene	Multiple_Complex
Kin	NM_025280; ENSMUST00000042512; ENSMUST00000142599; ENSMUST00000142773; BC028860; NM_025280.2; OTTMUST00000026264; OTTMUST00000026265; OTTMUST00000026266; uc008iho.1; uc008ihp.1; uc012bpd.1	TC0200000082.mm.1	242.191	237.207	274.374	294.067	75.0614	82.1393	149.086	128.89	antigenic determinant of rec-A protein	Multiple_Complex
Itih5	NM_172471; ENSMUST00000026886; BC043314; BC062196; NM_172471.2; OTTMUST00000026269; uc008ihr.1	TC0200000083.mm.1	19.1597	19.4271	22.1618	20.5348	26.1729	26.7228	27.2843	37.2715	inter-alpha (globulin) inhibitor H5	Multiple_Complex
Sfmbt2	NM_001198808; NM_001198809; NM_177386; ENSMUST00000041105; ENSMUST00000114861; ENSMUST00000114862; ENSMUST00000114864; ENSMUST00000116594; ENSMUST00000126531; ENSMUST00000145398; BC139354; BC145610; NM_001198808.1; NM_001198809.1; NM_177386.5; OTTMUST00000026258; OTTMUST00000026259; OTTMUST00000026260; OTTMUST00000026261; OTTMUST00000026262; OTTMUST00000026263; uc008iht.2; uc008ihu.2; uc008ihv.2;…	TC0200000087.mm.1	29.8571	32.6724	37.014	36.7583	35.0174	39.3966	34.0598	30.91	Scm-like with four mbt domains 2	Multiple_Complex
Gm13297	ENSMUST00000120205	TC0200000210.mm.1	22.1618	21.259	17.5087	20.393	21.4068	29.446	20.9663	22.9433	predicted gene 13297 [Source:MGI Symbol;Acc:MGI:3649442]	Multiple_Complex
Gm13295	ENSMUST00000118572	TC0200000216.mm.1	1305.15	1418.35	1795.29	1820.35	4770.75	4904.87	1663.49	1209.34	predicted gene 13295	Multiple_Complex
Il2ra	NM_008367; ENSMUST00000028111; ENSMUST00000150890; BC114437; NM_008367.3; OTTMUST00000026233; OTTMUST00000026234; uc008iip.2; uc008iiq.2	TC0200000220.mm.1	35.5062	32.2226	30.6965	30.0647	42.8137	50.2134	60.1295	32.8996	interleukin 2 receptor, alpha chain	Multiple_Complex
Il15ra	NM_001271497; NM_001271498; NM_001271499; NM_001271500; NM_001271501; NM_008358; NM_133836; NR_073191; NR_073192; ENSMUST00000078834; ENSMUST00000091456; ENSMUST00000114831; ENSMUST00000114832; ENSMUST00000114833; ENSMUST00000114834; ENSMUST00000123600; ENSMUST00000124448; ENSMUST00000126394; ENSMUST00000128156; ENSMUST00000130245; ENSMUST00000133975; ENSMUST00000135341; ENSMUST00000138349; ENSMU…	TC0200000222.mm.1	26.9087	26.3549	29.2426	31.3414	38.5859	48.5029	44.0173	26.1729	interleukin 15 receptor, alpha chain; interleukin 15 receptor, alpha chain (Il15ra), transcript variant 2, mRNA.; interleukin 15 receptor, alpha chain (Il15ra), transcript variant 1, mRNA.	Multiple_Complex
Ankrd16	NM_177268; ENSMUST00000056108; ENSMUST00000125024; ENSMUST00000128774; ENSMUST00000130186; ENSMUST00000133664; ENSMUST00000142622; ENSMUST00000145547; ENSMUST00000148498; ENSMUST00000150213; ENSMUST00000150320; ENSMUST00000156067; BC116229; BC116230; NM_177268.4; OTTMUST00000026464; OTTMUST00000026465; OTTMUST00000026466; OTTMUST00000026468; OTTMUST00000026469; OTTMUST00000026470; OTTMUST00000026…	TC0200000223.mm.1	35.5062	40.5042	34.7755	36.2523	33.1285	32.4467	32.8996	36.2523	ankyrin repeat domain 16	Multiple_Complex
Pter	NM_008961; ENSMUST00000028063; ENSMUST00000114796; ENSMUST00000134794; ENSMUST00000150283; ENSMUST00000154269; BC003793; NM_008961.2; OTTMUST00000026042; OTTMUST00000026043; OTTMUST00000026044; OTTMUST00000026045; OTTMUST00000026046	TC0200000228.mm.1	897.644	975.501	639.145	481.036	1562.89	1105.13	729.114	2486.67	phosphotriesterase related	Multiple_Complex
Gm9875	ENSMUST00000064229; XR_140490.1	TC0200000239.mm.1	16.9123	14.2215	19.0273	19.4271	26.9087	25.8125	26.3549	20.6776	predicted gene 9875	Multiple_Complex
Vim	NM_011701; ENSMUST00000028062; ENSMUST00000141365; ENSMUST00000148248; ENSMUST00000155605; BC089335; NM_011701.4; OTTMUST00000026365; OTTMUST00000026366; OTTMUST00000026367; OTTMUST00000026368; uc008ikb.2	TC0200000240.mm.1	57.2816	97.0059	39.6706	39.6706	37.5307	36.5044	43.1115	113.772	vimentin	Multiple_Complex
Stam	NM_011484; ENSMUST00000028050; ENSMUST00000102960; ENSMUST00000128777; ENSMUST00000131734; ENSMUST00000138989; ENSMUST00000140694; ENSMUST00000144944; ENSMUST00000156901; BC044666; BC055326; NM_011484.2; OTTMUST00000026673; OTTMUST00000026674; OTTMUST00000026675; OTTMUST00000026676; OTTMUST00000026677; OTTMUST00000026678; OTTMUST00000026679; OTTMUST00000026680; uc008ikg.1; uc008ikh.1; uc008iki.1	TC0200000242.mm.1	168.897	165.421	150.123	145.009	165.421	177.294	317.365	128	signal transducing adaptor molecule (SH3 domain and ITAM motif) 1	Multiple_Complex
Tmem236	NM_001081310; ENSMUST00000077517; NM_001081310.2; OTTMUST00000026693; uc008ikj.1	TC0200000244.mm.1	14.9285	14.0257	15.6707	16.2234	22.4711	16.6795	31.125	15.3482	transmembrane protein 236	Multiple_Complex
Mrc1	NM_008625; ENSMUST00000028045; ENSMUST00000146168; BC141338; NM_008625.2; OTTMUST00000026697; OTTMUST00000026698; uc008ikk.2	TC0200000245.mm.1	120.259	127.116	98.36	83.8652	178.527	135.298	63.1189	196.72	mannose receptor, C type 1	Multiple_Complex
Cacnb2	NM_001252533; NM_023116; NR_045533; ENSMUST00000114718; ENSMUST00000114719; ENSMUST00000114723; ENSMUST00000123719; ENSMUST00000137746; ENSMUST00000144423; ENSMUST00000148676; ENSMUST00000156027; BC109156; BC109157; NM_001252533.1; NM_023116.4; NR_045533.1; OTTMUST00000026325; OTTMUST00000026326; OTTMUST00000026327; OTTMUST00000026328; OTTMUST00000026329; OTTMUST00000026330; OTTMUST00000026331; O…	TC0200000250.mm.1	64.8934	64.4452	54.9482	58.892	171.255	141.044	199.466	129.787	calcium channel, voltage-dependent, beta 2 subunit; calcium channel, voltage-dependent, beta 2 subunit (Cacnb2), transcript variant 3, long non-coding RNA.	Multiple_Complex
Gm13312	ENSMUST00000119631	TC0200000252.mm.1	64	82.7106	55.3304	97.6806	35.0174	35.5062	37.014	35.0174	predicted gene 13312 [Source:MGI Symbol;Acc:MGI:3651094]	Multiple_Complex
Gm13315	NR_028497; uc012bra.1	TC0200000256.mm.1	24.4201	37.014	31.3414	32.6724	34.0598	39.1245	32.2226	26.7228	lactate dehydrogenase A pseudogene	Multiple_Complex
Arl5b	NM_029466; ENSMUST00000017562; ENSMUST00000069870; ENSMUST00000128682; ENSMUST00000129509; BC066810; NM_029466.4; OTTMUST00000026651; OTTMUST00000026652; OTTMUST00000077810; OTTMUST00000077811; uc008iky.1	TC0200000261.mm.1	385.343	398.932	321.795	337.794	213.783	202.251	935.763	415.873	ADP-ribosylation factor-like 5B	Multiple_Complex
Gm13313	ENSMUST00000118938	TC0200000263.mm.1	73.0089	68.1197	64.8934	62.2499	72.5046	101.125	62.6829	65.3448	predicted gene 13313 [Source:MGI Symbol;Acc:MGI:3651091]	Multiple_Complex
Gm13367	ENSMUST00000119955	TC0200000265.mm.1	18.6357	16.7955	16.3362	17.1484	19.9733	19.8353	26.5382	19.0273	predicted gene 13367 [Source:MGI Symbol;Acc:MGI:3651223]	Multiple_Complex
Gm13366	ENSMUST00000122198	TC0200000266.mm.1	13.1775	14.3204	15.455	14.3204	17.0299	13.737	24.9333	18.1261	predicted gene 13366 [Source:MGI Symbol;Acc:MGI:3651974]	Multiple_Complex
Gm13368	ENSMUST00000122443	TC0200000268.mm.1	32.2226	33.3589	37.2715	40.2244	49.18	47.8352	35.7532	27.0958	predicted gene 13368 [Source:MGI Symbol;Acc:MGI:3651966]	Multiple_Complex
Gm6587	ENSMUST00000120219	TC0200000271.mm.1	27.4741	37.7918	31.3414	35.261	36.2523	32.8996	38.5859	28.6408	predicted gene 6587 [Source:MGI Symbol;Acc:MGI:3645486]	Multiple_Complex
Gm13317; RP23-119O19.2	ENSMUST00000122060; OTTMUST00000026657	TC0200000273.mm.1	16.4498	17.5087	17.5087	16.6795	20.393	16.7955	21.4068	21.1121	predicted gene 13317; novel pseudogene	Multiple_Complex
Plxdc2	NM_026162; ENSMUST00000028081; ENSMUST00000114702; ENSMUST00000114703; ENSMUST00000126173; BC057881; NM_026162.5; OTTMUST00000026660; OTTMUST00000026769; OTTMUST00000026770; OTTMUST00000026771	TC0200000274.mm.1	242.191	235.568	202.251	240.518	621.668	474.413	32.8996	352.139	plexin domain containing 2	Multiple_Complex
Gm13325	ENSMUST00000118746	TC0200000284.mm.1	65.3448	63.1189	82.7106	106.891	51.6251	76.1093	77.7085	78.7932	predicted gene 13325 [Source:MGI Symbol;Acc:MGI:3650421]	Multiple_Complex
Mllt10	NM_001252560; NM_001252561; NM_010804; NR_045538; NR_045539; ENSMUST00000028076; ENSMUST00000114669; ENSMUST00000114671; ENSMUST00000114680; ENSMUST00000133649; ENSMUST00000148229; ENSMUST00000149786; ENSMUST00000150422; ENSMUST00000153279; ENSMUST00000154041; ENSMUST00000155352; BC070475; NM_001252560.1; NM_001252561.1; NM_010804.4; NR_045538.1; NR_045539.1; OTTMUST00000026803; OTTMUST0000002694…	TC0200000293.mm.1	1468.37	1428.22	1260.69	1209.34	2418.67	1698.45	1734.13	2005.85	myeloid/lymphoid or mixed-lineage leukemia (trithorax homolog, Drosophila); translocated to, 10	Multiple_Complex
Commd3	NM_147778; ENSMUST00000061158; ENSMUST00000130537; ENSMUST00000131369; ENSMUST00000133685; ENSMUST00000133828; ENSMUST00000137317; ENSMUST00000137817; ENSMUST00000150590; ENSMUST00000151230; ENSMUST00000151974; ENSMUST00000154519; ENSMUST00000171845; BC038077; BC048815; NM_147778.3; OTTMUST00000026751; OTTMUST00000026752; OTTMUST00000026753; OTTMUST00000026754; OTTMUST00000026755; OTTMUST00000026…	TC0200000301.mm.1	274.374	280.139	254.232	282.088	548.748	617.374	232.325	541.193	COMM domain containing 3	Multiple_Complex
Bmi1	NM_007552; ENSMUST00000028071; ENSMUST00000051929; ENSMUST00000132014; ENSMUST00000134734; ENSMUST00000147365; ENSMUST00000150834; ENSMUST00000156284; BC053708; BC056384; NM_007552.4; OTTMUST00000026762; OTTMUST00000026763; OTTMUST00000026764; OTTMUST00000026765; OTTMUST00000026766; OTTMUST00000026767; uc008ily.1; uc008ilz.1	TC0200000302.mm.1	38431.5	39511.9	32768	31000.4	41764.8	31651.8	57449.2	43538.4	Bmi1 polycomb ring finger oncogene	Multiple_Complex
Gm13333	ENSMUST00000119424	TC0200000304.mm.1	139.102	132.514	155.417	176.069	126.238	91.7731	202.251	127.116	predicted gene 13333 [Source:MGI Symbol;Acc:MGI:3649264]	Multiple_Complex
4930426L09Rik	NR_024323; NR_024323.1; uc012bre.1	TC0200000306.mm.1	17.7531	14.8254	15.0324	16.7955	19.0273	17.2677	19.1597	19.1597	RIKEN cDNA 4930426L09 gene	Multiple_Complex
Msrb2	NM_029619; ENSMUST00000023856; ENSMUST00000126894; ENSMUST00000137812; ENSMUST00000153289; BC021619; NM_029619.2; OTTMUST00000026863; OTTMUST00000026864; OTTMUST00000026865; OTTMUST00000026866; uc008imf.2	TC0200000312.mm.1	45.5696	46.2057	51.2685	54.1917	63.1189	70.5219	53.4456	49.18	methionine sulfoxide reductase B2	Multiple_Complex
Etl4	NM_001081006; NM_001177630; NM_001177631; NM_029895; NM_178059; ENSMUST00000045555; ENSMUST00000066509; ENSMUST00000114604; ENSMUST00000114606; ENSMUST00000114607; ENSMUST00000114608; ENSMUST00000114610; ENSMUST00000114614; ENSMUST00000114627; ENSMUST00000123383; ENSMUST00000125556; ENSMUST00000125772; ENSMUST00000129278; ENSMUST00000131714; ENSMUST00000136870; ENSMUST00000139531; ENSMUST00000146…	TC0200000319.mm.1	86.8227	89.2636	88.647	85.0359	93.0542	89.2636	81.0084	80.4489	enhancer trap locus 4	Multiple_Complex
Gpr158	NM_001004761; ENSMUST00000055946; ENSMUST00000155760; BC156791; NM_001004761.1; OTTMUST00000026780; OTTMUST00000026781; uc008ine.1; uc008inf.1	TC0200000342.mm.1	68.5935	75.0614	60.1295	58.0812	67.6492	71.0124	61.3929	88.0347	G protein-coupled receptor 158; Synthetic construct Mus musculus clone IMAGE:100062508, MGC:190898 G protein-coupled receptor 158 (Gpr158) mRNA, encodes complete protein.	Multiple_Complex
Myo3a	NM_148413; ENSMUST00000044749; ENSMUST00000138850; ENSMUST00000138863; ENSMUST00000142435; ENSMUST00000149423; ENSMUST00000153002; uc008ing.2; uc029tvw.1; uc029tvx.1	TC0200000346.mm.1	60.1295	64.4452	54.9482	58.0812	75.0614	83.2859	66.257	48.5029	myosin IIIA	Multiple_Complex
Gad2	NM_008078; ENSMUST00000028123; ENSMUST00000156728; BC018380; NM_008078.2; OTTMUST00000026891; OTTMUST00000026892; uc008ini.1; uc008inj.1; uc008ink.1	TC0200000347.mm.1	25.8125	25.1067	25.8125	27.6652	33.8246	35.5062	29.8571	28.6408	glutamic acid decarboxylase 2	Multiple_Complex
Mir3967	NR_039548; NR_039548.1; uc029tvy.1	TC0200000348.mm.1	20.6776	25.2813	18.3792	26.1729	22.6274	26.9087	21.7057	22.9433	microRNA 3967; microRNA 3967 (Mir3967), microRNA.	Multiple_Complex
Apbb1ip	NM_019456; ENSMUST00000014290; ENSMUST00000131195; ENSMUST00000132993; ENSMUST00000148315; BC023110; NM_019456.2; OTTMUST00000026985; OTTMUST00000026986; OTTMUST00000026987; OTTMUST00000040191; uc008inl.2; uc008inm.2; uc008inn.2; uc008ino.2	TC0200000352.mm.1	24.4201	26.5382	26.3549	30.4844	32.6724	39.3966	33.5909	27.8576	amyloid beta (A4) precursor protein-binding, family B, member 1 interacting protein	Multiple_Complex
Pdss1	NM_019501; ENSMUST00000053729; ENSMUST00000135621; ENSMUST00000139472; ENSMUST00000141215; ENSMUST00000148072; ENSMUST00000149229; ENSMUST00000152170; BC026820; NM_019501.3; OTTMUST00000040189; OTTMUST00000040190; OTTMUST00000083319; OTTMUST00000083320; OTTMUST00000083321; OTTMUST00000083322; OTTMUST00000083323; uc008inp.1; uc008inq.1	TC0200000354.mm.1	304.437	288.015	263.197	212.306	64.4452	74.028	74.028	212.306	prenyl (solanesyl) diphosphate synthase, subunit 1	Multiple_Complex
Acbd5	NM_001102436; NM_001102437; NM_001102438; NM_028793; ENSMUST00000028121; ENSMUST00000114523; ENSMUST00000114526; ENSMUST00000114529; ENSMUST00000144088; ENSMUST00000155602; BC061484; BC084584; NM_001102436.1; NM_001102437.1; NM_001102438.1; NM_028793.3; OTTMUST00000026995; OTTMUST00000026996; OTTMUST00000026997; OTTMUST00000027211; uc008inx.1; uc008iny.1; uc008inz.1; uc008ioa.1	TC0200000361.mm.1	1016.93	1052.79	648.067	522.758	349.706	227.544	494.559	1060.11	acyl-Coenzyme A binding domain containing 5	Multiple_Complex
Yme1l1	NM_013771; ENSMUST00000028117; ENSMUST00000125004; ENSMUST00000134342; ENSMUST00000147750; ENSMUST00000148616; ENSMUST00000149240; BC007128; NM_013771.5; OTTMUST00000027216; OTTMUST00000027219; OTTMUST00000027220; OTTMUST00000027221; OTTMUST00000027222; OTTMUST00000028678; uc008iod.2; uc008ioe.2	TC0200000363.mm.1	2876.3	2574.36	2556.58	1937.53	294.067	272.479	903.888	2592.27	YME1-like 1 (S. cerevisiae)	Multiple_Complex
Gm13422	ENSMUST00000118834	TC0200000366.mm.1	6746.86	7332.05	5148.73	4576.41	3281.18	1897.65	11505.2	7332.05	predicted gene 13422 [Source:MGI Symbol;Acc:MGI:3650167]	Multiple_Complex
Gm13331	ENSMUST00000117500	TC0200000369.mm.1	31651.8	31000.4	29328.2	35364.2	68319	59064.4	50012.5	48983.2	predicted gene 13331 [Source:MGI Symbol;Acc:MGI:3649454]	Multiple_Complex
Sh3d2c-ps1	OTTMUST00000027471	TC0200000370.mm.1	32.6724	30.91	32.8996	37.014	47.1766	45.2548	35.0174	33.1285	SH3 domain protein 2C, pseudogene 1	Multiple_Complex
Il1f6	NM_019450; ENSMUST00000028361; ENSMUST00000144442; BC117102; BC117104; NM_019450.3; OTTMUST00000028277; OTTMUST00000028278; uc008ioq.1; uc008ior.1	TC0200000377.mm.1	33.8246	30.0647	35.5062	38.3193	43.4113	48.1679	43.1115	38.5859	interleukin 1 family, member 6	Multiple_Complex
Il1f5	NM_001146087; NM_001146088; NM_019451; ENSMUST00000028360; ENSMUST00000114490; ENSMUST00000123053; ENSMUST00000123577; ENSMUST00000147885; ENSMUST00000168941; BC132600; BC132602; NM_001146087.1; NM_001146088.1; NM_019451.2; OTTMUST00000028269; OTTMUST00000028270; OTTMUST00000028271; OTTMUST00000028272; OTTMUST00000028273; uc008ios.2; uc008iot.2; uc012brp.1	TC0200000379.mm.1	19.1597	18.3792	21.4068	20.8215	25.4572	35.0174	31.779	28.84	interleukin 1 family, member 5 (delta)	Multiple_Complex
Il1rn	NM_001039701; NM_001159562; NM_031167; ENSMUST00000114482; ENSMUST00000114485; ENSMUST00000114486; ENSMUST00000114487; ENSMUST00000142093; ENSMUST00000143423; BC042532; NM_001039701.3; NM_001159562.1; NM_031167.5; OTTMUST00000028283; OTTMUST00000028284; OTTMUST00000028285; OTTMUST00000028286; OTTMUST00000028287; OTTMUST00000028288; uc008iov.2; uc008iow.2; uc008iox.2	TC0200000382.mm.1	17.3878	18.3792	19.8353	19.1597	20.5348	27.8576	32.4467	20.8215	interleukin 1 receptor antagonist	Multiple_Complex
Psd4	NM_177611; ENSMUST00000056641; ENSMUST00000102942; ENSMUST00000127242; ENSMUST00000131930; ENSMUST00000132924; ENSMUST00000133730; ENSMUST00000140303; ENSMUST00000140547; ENSMUST00000142522; ENSMUST00000166388; BC068231; NM_177611.3; OTTMUST00000028258; OTTMUST00000028259; OTTMUST00000028260; OTTMUST00000028261; OTTMUST00000028262; OTTMUST00000028263; OTTMUST00000028264; OTTMUST00000028265; OTTMU…	TC0200000383.mm.1	38.5859	41.6429	49.8665	49.8665	38.5859	41.9326	39.3966	36.5044	pleckstrin and Sec7 domain containing 4	Multiple_Complex
Gm13415; Gm27193; RP23-264D16.1	ENSMUST00000131886; ENSMUST00000135829; ENSMUST00000184217; OTTMUST00000028468; OTTMUST00000028469	TC0200000385.mm.1	17.3878	15.8895	18.2522	18.0009	20.5348	22.0087	21.259	15.8895	predicted gene 13415 [Source:MGI Symbol;Acc:MGI:3651241]; predicted gene 27193 [Source:MGI Symbol;Acc:MGI:5521036]; novel transcript, antisense to Pax8	Multiple_Complex
Gm13418	ENSMUST00000179043	TC0200000386.mm.1	57.2816	55.3304	65.7993	56.493	46.2057	54.5686	56.493	54.9482	predicted gene 13418	Multiple_Complex
Gm13459	ENSMUST00000121558	TC0200000388.mm.1	23.1029	25.8125	31.779	24.0839	30.91	31.779	23.4254	25.1067	predicted gene 13459 [Source:MGI Symbol;Acc:MGI:3651862]	Multiple_Complex
Zmynd19	NM_026021; ENSMUST00000028350; ENSMUST00000148042; BC027321; NM_026021.3; OTTMUST00000026903; OTTMUST00000026904; uc008ipo.1; uc008ipp.1	TC0200000391.mm.1	6338.83	6295.04	7281.4	6382.92	4640.29	2936.74	7231.1	6700.25	zinc finger, MYND domain containing 19	Multiple_Complex
Dph7	NM_026044; ENSMUST00000028351; ENSMUST00000124383; ENSMUST00000126909; ENSMUST00000135339; ENSMUST00000143253; ENSMUST00000146382; ENSMUST00000153375; NM_026044.3; OTTMUST00000027007; OTTMUST00000027008; OTTMUST00000027009; OTTMUST00000027010; OTTMUST00000027011; OTTMUST00000027012; OTTMUST00000027013; uc008ipq.2; uc008ipr.2; uc008ips.2; uc008ipt.1	TC0200000392.mm.1	195.361	215.269	152.219	157.586	60.5477	66.7178	124.5	154.343	diphthamine biosynethesis 7	Multiple_Complex
Pnpla7	NM_146251; ENSMUST00000045295; ENSMUST00000128517; ENSMUST00000132082; ENSMUST00000137913; ENSMUST00000138536; ENSMUST00000139031; ENSMUST00000139643; ENSMUST00000141584; ENSMUST00000142139; ENSMUST00000145508; ENSMUST00000146153; ENSMUST00000152777; ENSMUST00000153618; ENSMUST00000154359; ENSMUST00000155601; BC141365; BC141366; NM_146251.4; OTTMUST00000027161; OTTMUST00000027162; OTTMUST00000027…	TC0200000393.mm.1	79.3413	82.7106	76.1093	79.3413	62.6829	66.257	86.2229	64.8934	patatin-like phospholipase domain containing 7	Multiple_Complex
Nsmf	NM_001039386; NM_001039387; NM_001177654; NM_001177655; NM_020276; ENSMUST00000006646; ENSMUST00000074422; ENSMUST00000100334; ENSMUST00000102931; ENSMUST00000114386; ENSMUST00000114388; ENSMUST00000116574; ENSMUST00000124309; ENSMUST00000132172; ENSMUST00000134744; ENSMUST00000135328; ENSMUST00000140733; ENSMUST00000140737; ENSMUST00000141866; ENSMUST00000144520; ENSMUST00000152122; ENSMUST00000…	TC0200000395.mm.1	25.6342	25.8125	27.2843	25.4572	27.4741	30.4844	26.9087	23.2636	NMDA receptor synaptonuclear signaling and neuronal migration factor	Multiple_Complex
Entpd8	NM_028093; ENSMUST00000044078; ENSMUST00000114376; ENSMUST00000114380; ENSMUST00000127384; ENSMUST00000135004; ENSMUST00000149470; ENSMUST00000150625; ENSMUST00000152326; BC031143; NM_028093.1; OTTMUST00000027631; OTTMUST00000027632; OTTMUST00000027633; OTTMUST00000027634; OTTMUST00000027635; OTTMUST00000027636; OTTMUST00000027637; OTTMUST00000027638; uc008iqf.1; uc008iqg.1; uc009vca.1	TC0200000397.mm.1	24.0839	25.1067	26.9087	24.4201	31.125	32.4467	34.5353	27.8576	ectonucleoside triphosphate diphosphohydrolase 8	Multiple_Complex
Fam166a	NM_026624; ENSMUST00000028346; ENSMUST00000139988; BC061039; NM_026624.3; OTTMUST00000027722; OTTMUST00000027723; uc008iqr.2	TC0200000401.mm.1	31.3414	36.2523	39.6706	40.5042	48.8403	67.6492	47.1766	23.2636	family with sequence similarity 166, member A	Multiple_Complex
Tprn	NM_175286; ENSMUST00000114336; ENSMUST00000137361; ENSMUST00000141509; ENSMUST00000155738; BC089508; NM_175286.4; OTTMUST00000028085; OTTMUST00000028086; OTTMUST00000028087; OTTMUST00000028088; uc008ira.2	TC0200000405.mm.1	6984.79	6122.9	9541.5	11268.4	1652	1924.14	1884.54	1192.69	taperin	Multiple_Complex
Anapc2	NM_175300; ENSMUST00000028341; ENSMUST00000125885; ENSMUST00000129265; ENSMUST00000129300; BC137583; NM_175300.4; OTTMUST00000028080; OTTMUST00000028081; OTTMUST00000028082; OTTMUST00000028083; uc008ird.2; uc008ire.2	TC0200000406.mm.1	225.972	235.568	173.645	167.73	130.69	109.896	116.162	142.025	anaphase promoting complex subunit 2	Multiple_Complex
Tmem210	NM_030055; ENSMUST00000028340; ENSMUST00000144102; NM_030055.1; OTTMUST00000028089; OTTMUST00000028090; uc008irf.2	TC0200000407.mm.1	29.8571	27.8576	48.1679	56.493	81.5719	90.5097	52.3457	29.2426	transmembrane protein 210	Multiple_Complex
Grin1os	NM_001242940; uc008irj.1	TC0200000409.mm.1	23.4254	22.1618	29.8571	25.8125	26.3549	25.2813	29.6508	18.1261	glutamate receptor, ionotropic, NMDA1 (zeta 1), opposite strand	Multiple_Complex
Man1b1	NM_001029983; ENSMUST00000042390; ENSMUST00000126210; ENSMUST00000131826; ENSMUST00000136245; ENSMUST00000149464; ENSMUST00000152245; BC138550; BC138551; NM_001029983.2; OTTMUST00000028418; OTTMUST00000028419; OTTMUST00000028420; OTTMUST00000028421; OTTMUST00000028422; OTTMUST00000028423; uc008iro.2; uc008irp.2	TC0200000410.mm.1	797.865	729.114	1112.82	1105.13	173.645	187.403	160.898	191.341	mannosidase, alpha, class 1B, member 1	Multiple_Complex
Sapcd2	NM_001081085; ENSMUST00000028329; ENSMUST00000100323; ENSMUST00000114293; ENSMUST00000129214; ENSMUST00000132539; ENSMUST00000137171; ENSMUST00000155310; BC070477; NM_001081085.1; OTTMUST00000028575; OTTMUST00000028576; OTTMUST00000028577; OTTMUST00000028578; OTTMUST00000028579; OTTMUST00000028580	TC0200000413.mm.1	190.019	173.645	151.167	128.89	50.2134	48.5029	78.249	95.6704	suppressor APC domain containing 2	Multiple_Complex
Entpd2	NM_009849; ENSMUST00000028328; ENSMUST00000140590; ENSMUST00000148859; BC011241; NM_009849.2; OTTMUST00000028581; OTTMUST00000028582; OTTMUST00000028821; uc008irw.2	TC0200005462.mm.1	50.9143	54.1917	52.3457	48.8403	46.2057	45.2548	44.0173	43.1115	ectonucleoside triphosphate diphosphohydrolase 2	Multiple_Complex
Npdc1	NM_008721; ENSMUST00000055921; ENSMUST00000071442; ENSMUST00000128144; ENSMUST00000131185; ENSMUST00000133409; ENSMUST00000136138; ENSMUST00000138651; ENSMUST00000141106; ENSMUST00000141567; ENSMUST00000144413; ENSMUST00000154809; ENSMUST00000156824; BC003320; BC023887; NM_008721.3; OTTMUST00000028836; OTTMUST00000028837; OTTMUST00000028839; OTTMUST00000028840; OTTMUST00000028841; OTTMUST00000028…	TC0200005463.mm.1	72.0037	81.0084	98.36	84.4485	82.7106	103.968	72.0037	49.5221	neural proliferation, differentiation and control 1	Multiple_Complex
Fut7	NM_001177366; NM_001177367; NM_001289453; NM_001289454; NM_001289455; NM_001289456; NM_013524; ENSMUST00000041654; ENSMUST00000100320; ENSMUST00000114278; ENSMUST00000134259; ENSMUST00000142156; BC104732; BC105670; BC105671; BC105672; NM_001177366.1; NM_001177367.1; NM_013524.3; OTTMUST00000028833; OTTMUST00000028834; OTTMUST00000028835; uc008irz.2; uc012brx.1; uc008isa.2; uc008isb.2; uc012bry.1;…	TC0200000416.mm.1	29.0406	33.8246	35.0174	33.8246	46.5271	53.0765	48.1679	37.7918	fucosyltransferase 7; fucosyltransferase 7 (Fut7), transcript variant 2, mRNA.	Multiple_Complex
Abca2	NM_007379; ENSMUST00000102919; ENSMUST00000125520; ENSMUST00000141065; ENSMUST00000143075; ENSMUST00000144560; ENSMUST00000149385; ENSMUST00000150550; BC157022; NM_007379.2; OTTMUST00000028850; OTTMUST00000028851; OTTMUST00000028852; OTTMUST00000028853; OTTMUST00000028854; OTTMUST00000028855; OTTMUST00000028856; uc008isc.1	TC0200000417.mm.1	40.2244	41.9326	39.3966	38.3193	47.8352	47.1766	40.5042	44.6318	ATP-binding cassette, sub-family A (ABC1), member 2; Synthetic construct Mus musculus clone IMAGE:100063277, MGC:191050 ATP-binding cassette, sub-family A (ABC1), member 2 (Abca2) mRNA, encodes complete protein.	Multiple_Complex
Mir3087	NR_037270; NR_037270.1; uc012bsb.1	TC0200000418.mm.1	17.3878	19.9733	24.761	21.5557	23.4254	38.3193	32.8996	22.4711	microRNA 3087; microRNA 3087 (Mir3087), microRNA.	Multiple_Complex
Clic3	NM_027085; ENSMUST00000102918; ENSMUST00000114265; ENSMUST00000132311; ENSMUST00000140022; ENSMUST00000142006; ENSMUST00000143862; BC060967; NM_027085.3; OTTMUST00000028906; OTTMUST00000028907; OTTMUST00000028908; OTTMUST00000028909; OTTMUST00000028910; OTTMUST00000028911; uc008isd.1	TC0200000419.mm.1	26.3549	25.2813	28.0514	27.8576	32.6724	34.2968	36.2523	31.5594	chloride intracellular channel 3	Multiple_Complex
Fbxw5	NM_013908; ENSMUST00000015239; ENSMUST00000124258; ENSMUST00000124375; ENSMUST00000126601; ENSMUST00000129104; ENSMUST00000135456; ENSMUST00000135511; ENSMUST00000142004; ENSMUST00000148845; BC010776; NM_013908.4; OTTMUST00000028918; OTTMUST00000028919; OTTMUST00000028920; OTTMUST00000028921; OTTMUST00000028922; OTTMUST00000028923; OTTMUST00000028924; OTTMUST00000028925; OTTMUST00000028926; uc008…	TC0200000420.mm.1	162.017	142.025	128.89	144.007	229.126	233.941	259.574	298.172	F-box and WD-40 domain protein 5	Multiple_Complex
Gm13433	ENSMUST00000121701	TC0200000421.mm.1	1595.73	1305.15	1770.57	2179.83	776.047	849.223	855.13	1184.45	predicted gene 13433 [Source:MGI Symbol;Acc:MGI:3651454]	Multiple_Complex
Edf1	NM_021519; ENSMUST00000015236; ENSMUST00000134689; ENSMUST00000142288; ENSMUST00000144395; ENSMUST00000153008; BC023472; NM_021519.1; OTTMUST00000029010; OTTMUST00000029011; OTTMUST00000029012; OTTMUST00000029013; OTTMUST00000029014; uc008isn.1	TC0200000422.mm.1	306.555	335.461	274.374	312.996	110.661	136.239	101.125	118.603	endothelial differentiation-related factor 1	Multiple_Complex
Lcn5	NM_001042630; NM_001276257; NM_007947; ENSMUST00000028306; ENSMUST00000100312; ENSMUST00000100313; ENSMUST00000143401; BC146485; NM_001042630.1; NM_007947.2; OTTMUST00000029721; OTTMUST00000029722; OTTMUST00000029723; OTTMUST00000029724; uc008itb.1; uc008itc.1	TC0200000428.mm.1	16.3362	16.3362	16.9123	17.1484	19.4271	19.1597	23.1029	17.2677	lipocalin 5; Synthetic construct Mus musculus clone IMAGE:100015054, MGC:180351 lipocalin 5 (Lcn5) mRNA, encodes complete protein.	Multiple_Complex
Lcn6	NM_001276448; NM_177840; ENSMUST00000059693; ENSMUST00000114197; ENSMUST00000114199; ENSMUST00000139441; NM_177840.3; OTTMUST00000029736; OTTMUST00000029737; OTTMUST00000029738; OTTMUST00000029739; uc012bse.1; uc029twb.1; uc029twc.1	TC0200000429.mm.1	27.2843	26.1729	28.443	30.91	32.6724	32.2226	42.2243	29.446	lipocalin 6	Multiple_Complex
Kcnt1	NM_001145403; NM_175462; ENSMUST00000037580; ENSMUST00000114170; ENSMUST00000114172; ENSMUST00000114176; ENSMUST00000128502; ENSMUST00000131529; ENSMUST00000138568; ENSMUST00000145544; ENSMUST00000150788; ENSMUST00000153001; ENSMUST00000171268; BC141190; BC171963; BC172746; NM_001145403.1; NM_175462.3; OTTMUST00000030153; OTTMUST00000030154; OTTMUST00000030155; OTTMUST00000030156; OTTMUST00000030…	TC0200000438.mm.1	24.4201	25.9921	25.9921	26.9087	31.5594	33.3589	31.5594	24.2515	potassium channel, subfamily T, member 1; Synthetic construct Homo sapiens clone IMAGE:9094540; MGC:199306 potassium channel, subfamily T, member 1 (Kcnt1) gene, encodes complete protein.	Multiple_Complex
Gpsm1	NM_001199146; NM_001199147; NM_153410; ENSMUST00000066889; ENSMUST00000066936; ENSMUST00000078616; ENSMUST00000114134; ENSMUST00000123981; ENSMUST00000127453; ENSMUST00000132276; ENSMUST00000132638; ENSMUST00000142057; ENSMUST00000145884; ENSMUST00000147873; ENSMUST00000152895; ENSMUST00000153064; BC071197; NM_001199146.1; NM_001199147.1; NM_153410.5; OTTMUST00000030400; OTTMUST00000030401; OTTMU…	TC0200000445.mm.1	26.5382	25.8125	28.0514	29.0406	30.2738	33.1285	30.6965	27.4741	G-protein signalling modulator 1 (AGS3-like, C. elegans)	Multiple_Complex
Pmpca	NM_173180; ENSMUST00000076431; ENSMUST00000114093; ENSMUST00000134871; ENSMUST00000135155; ENSMUST00000137686; ENSMUST00000139535; BC010810; NM_173180.3; OTTMUST00000030547; OTTMUST00000030548; OTTMUST00000030549; OTTMUST00000030550; OTTMUST00000030551; OTTMUST00000030552; uc008ivd.1; uc008ive.1	TC0200000450.mm.1	1468.37	1478.58	1698.45	1488.87	250.732	324.034	270.597	560.278	peptidase (mitochondrial processing) alpha	Multiple_Complex
Gm13358	ENSMUST00000121427	TC0200000452.mm.1	13.3614	12.4666	14.0257	17.7531	16	18.0009	18.1261	14.6213	predicted gene 13358 [Source:MGI Symbol;Acc:MGI:3649552]	Multiple_Complex
Egfl7; Mir126a	NM_001164564; NM_178444; NM_198724; NM_198725; NR_029541; ENSMUST00000100290; ENSMUST00000102907; ENSMUST00000131112; ENSMUST00000139801; ENSMUST00000145575; ENSMUST00000147351; ENSMUST00000149460; ENSMUST00000149789; ENSMUST00000150404; ENSMUST00000152713; ENSMUST00000152988; ENSMUST00000166920; ENSMUST00000172683; ENSMUST00000173777; ENSMUST00000173920; ENSMUST00000174211; ENSMUST00000174465; E…	TC0200005464.mm.1	36.2523	34.2968	34.2968	34.2968	38.8542	37.5307	50.5626	35.0174	EGF-like domain 7; microRNA 126a	Multiple_Complex
Fam69b	NM_019833; ENSMUST00000074240; ENSMUST00000144449; ENSMUST00000153849; BC051954; BC060081; BC116751; NM_019833.3; OTTMUST00000027077; OTTMUST00000027078; OTTMUST00000027079; uc008ivx.2; uc012bsn.1	TC0200005465.mm.1	30.91	29.2426	28.84	31.779	29.6508	29.0406	34.2968	29.2426	family with sequence similarity 69, member B	Multiple_Complex
Rpl7a	NM_013721; BC065176; BC080663; BC080669; BC080712; BC084678; BC089624; BC091731; BC091769; BC099389; NM_013721.3; OTTMUST00000027522; OTTMUST00000027523; OTTMUST00000027524; OTTMUST00000027525; OTTMUST00000027526; OTTMUST00000027527; OTTMUST00000027528; uc008iwf.1	TC0200000457.mm.1	1675.06	1428.22	2368.9	2778.33	989.119	837.532	568.1	814.629	ribosomal protein L7A	Multiple_Complex
Surf2	NM_013678; ENSMUST00000015017; ENSMUST00000125408; ENSMUST00000126947; ENSMUST00000135506; ENSMUST00000143098; ENSMUST00000157066; BC096401; NM_013678.2; OTTMUST00000027503; OTTMUST00000027504; OTTMUST00000027505; OTTMUST00000027506; OTTMUST00000027507; OTTMUST00000027508; uc008iwi.1; uc008iwj.1; uc008iwk.1	TC0200000459.mm.1	245.572	254.232	252.476	224.411	71.0124	91.1392	89.2636	158.683	surfeit gene 2	Multiple_Complex
Adamts13	NM_001001322; ENSMUST00000014996; ENSMUST00000102891; ENSMUST00000147216; BC156647; NM_001001322.2; OTTMUST00000027822; OTTMUST00000027823; OTTMUST00000027824; uc008iwo.1; uc008iwp.1; uc012bsr.1; uc012bss.1	TC0200000461.mm.1	25.8125	27.4741	28.0514	27.8576	30.6965	30.6965	37.5307	29.446	a disintegrin-like and metallopeptidase (reprolysin type) with thrombospondin type 1 motif, 13; Synthetic construct Mus musculus clone IMAGE:100062198, MGC:190410 a disintegrin-like and metallopeptidase (reprolysin type) with thrombospondin type 1 motif, 13 (Adamts13) mRNA, encodes complete protein.	Multiple_Complex
Cacfd1	NM_001243239; NM_001243240; NM_029862; ENSMUST00000114003; ENSMUST00000114004; ENSMUST00000114005; ENSMUST00000114006; ENSMUST00000114007; ENSMUST00000133126; ENSMUST00000133807; ENSMUST00000145290; NM_001243239.1; NM_001243240.1; NM_029862.4; OTTMUST00000027831; OTTMUST00000027832; OTTMUST00000027833; OTTMUST00000027834; OTTMUST00000027835; OTTMUST00000027836; OTTMUST00000027837; OTTMUST00000027…	TC0200000462.mm.1	43.1115	46.2057	37.014	38.0546	47.5048	44.9422	44.9422	45.8866	calcium channel flower domain containing 1	Multiple_Complex
Gm13397	ENSMUST00000119562	TC0200000463.mm.1	171.255	146.018	122.786	157.586	57.2816	50.9143	79.8932	106.153	predicted gene 13397 [Source:MGI Symbol;Acc:MGI:3651605]	Multiple_Complex
Adamtsl2	NM_029981; ENSMUST00000091233; ENSMUST00000130600; ENSMUST00000139633; ENSMUST00000143246; ENSMUST00000169787; BC128568; BC129984; NM_029981.1; OTTMUST00000027839; OTTMUST00000027840; OTTMUST00000027841; OTTMUST00000027842; OTTMUST00000091633; uc008ixa.1; uc008ixb.1	TC0200000465.mm.1	19.6983	20.1122	21.5557	21.1121	24.59	29.2426	27.0958	21.8566	ADAMTS-like 2	Multiple_Complex
Dbh	NM_138942; ENSMUST00000000910; ENSMUST00000155290; BC141022; BC171949; NM_138942.3; OTTMUST00000027810; OTTMUST00000027811; uc008ixe.1	TC0200000467.mm.1	39.1245	40.2244	43.4113	42.2243	87.4266	82.7106	54.9482	36.2523	dopamine beta hydroxylase	Multiple_Complex
Gm20071	XM_003084491.1	TC0200000471.mm.1	30.91	27.8576	34.5353	32.6724	29.0406	30.91	40.7859	23.9176	PREDICTED: predicted gene, 20071 (Gm20071), mRNA.	Multiple_Complex
Wdr5	NM_080848; ENSMUST00000113952; ENSMUST00000125088; ENSMUST00000140396; ENSMUST00000144315; BC016103; BC025801; NM_080848.2; OTTMUST00000028670; OTTMUST00000028671; OTTMUST00000028672; OTTMUST00000028673; uc012bsw.2	TC0200000473.mm.1	6251.56	5673.41	6382.92	6165.49	6080.61	5184.54	3444.31	3743.05	WD repeat domain 5	Multiple_Complex
Rxra	NM_011305; ENSMUST00000077257; ENSMUST00000100251; ENSMUST00000113934; ENSMUST00000129514; ENSMUST00000148756; ENSMUST00000166775; BC138800; BC138802; NM_011305.3; OTTMUST00000028665; OTTMUST00000028666; OTTMUST00000028667; OTTMUST00000028668; OTTMUST00000028669; uc008ixs.1	TC0200000477.mm.1	67.1819	66.7178	72.5046	75.5835	71.0124	67.1819	60.1295	48.1679	retinoid X receptor alpha	Multiple_Complex
Col5a1	NM_015734; ENSMUST00000028280; ENSMUST00000145423; BC138447; BC138449; NM_015734.2; OTTMUST00000027017; OTTMUST00000027183; uc008ixt.2	TC0200000478.mm.1	22.6274	23.1029	23.7524	25.4572	30.91	32.2226	32	27.0958	collagen, type V, alpha 1	Multiple_Complex
Olfm1	NM_001038612; NM_001038613; NM_001038614; NM_019498; ENSMUST00000028177; ENSMUST00000100244; ENSMUST00000102879; ENSMUST00000113920; ENSMUST00000152415; BC026547; NM_001038612.1; NM_001038613.1; NM_001038614.1; NM_019498.2; OTTMUST00000027193; OTTMUST00000027194; OTTMUST00000027195; OTTMUST00000027196; uc008iya.1; uc008iyb.1; uc008iyc.1; uc008iyd.1	TC0200000480.mm.1	286.026	292.036	261.379	254.232	326.288	292.036	608.874	374.806	olfactomedin 1	Multiple_Complex
Ppp1r26	NM_001005420; ENSMUST00000040324; ENSMUST00000128199; ENSMUST00000150362; ENSMUST00000154081; BC070440; NM_001005420.1; OTTMUST00000027267; OTTMUST00000027268; OTTMUST00000027269; OTTMUST00000027270; uc008iye.1	TC0200000481.mm.1	47.5048	51.6251	46.2057	54.5686	77.7085	79.8932	44.0173	63.5579	protein phosphatase 1, regulatory subunit 26	Multiple_Complex
Mrps2	NM_001166031; NM_080452; ENSMUST00000038600; ENSMUST00000123533; ENSMUST00000146332; BC060503; NM_001166031.2; NM_080452.3; OTTMUST00000027259; OTTMUST00000027261; OTTMUST00000027262; uc008iyh.1; uc008iyg.1; uc008iyi.1; uc008iyj.1; uc008iyk.1; uc012bsy.1	TC0200000482.mm.1	158.683	159.786	139.102	146.018	137.187	133.436	170.072	157.586	mitochondrial ribosomal protein S2; mitochondrial ribosomal protein S2 (Mrps2), nuclear gene encoding mitochondrial protein, transcript variant 1, mRNA.	Multiple_Complex
Gbgt1	NM_139197; ENSMUST00000028172; ENSMUST00000127958; ENSMUST00000163121; BC106831; NM_139197.2; OTTMUST00000027271; OTTMUST00000027272; uc008iyl.2	TC0200000484.mm.1	14.42	13.737	16	15.2422	15.8895	18.2522	17.7531	14.9285	globoside alpha-1,3-N-acetylgalactosaminyltransferase 1	Multiple_Complex
Ralgds	NM_001145834; NM_001145835; NM_001145836; NM_009058; ENSMUST00000028170; ENSMUST00000100241; ENSMUST00000113893; ENSMUST00000128680; ENSMUST00000130281; ENSMUST00000135803; ENSMUST00000137215; ENSMUST00000137513; ENSMUST00000140704; ENSMUST00000146217; BC027225; NM_001145834.1; NM_001145835.1; NM_001145836.1; NM_009058.2; OTTMUST00000027249; OTTMUST00000027250; OTTMUST00000027251; OTTMUST00000027…	TC0200000486.mm.1	99.7331	105.42	104.691	99.0442	132.514	110.661	98.36	128	ral guanine nucleotide dissociation stimulator	Multiple_Complex
Tsc1	NM_001289575; NM_001289576; NM_022887; ENSMUST00000028155; ENSMUST00000113867; ENSMUST00000113869; ENSMUST00000113870; ENSMUST00000124507; ENSMUST00000125715; ENSMUST00000133565; ENSMUST00000139642; ENSMUST00000150274; ENSMUST00000153625; ENSMUST00000156857; BC052399; NM_022887.3; OTTMUST00000027552; OTTMUST00000027553; OTTMUST00000027554; OTTMUST00000027555; OTTMUST00000027557; OTTMUST0000002755…	TC0200000490.mm.1	347.291	388.023	298.172	278.204	308.687	230.72	54.9482	317.365	tuberous sclerosis 1; tuberous sclerosis 1 (Tsc1), mRNA.	Multiple_Complex
Ak8	NM_001033874; ENSMUST00000074156; ENSMUST00000123794; ENSMUST00000137588; BC100481; BC109352; NM_001033874.2; OTTMUST00000027604; OTTMUST00000027605; OTTMUST00000027606; uc008izd.1	TC0200000492.mm.1	38.5859	35.7532	43.7133	41.6429	50.9143	50.5626	41.0696	40.2244	adenylate kinase 8	Multiple_Complex
Ddx31	NM_001033294; ENSMUST00000113853; ENSMUST00000147071; ENSMUST00000147779; ENSMUST00000152685; BC066017; BC132351; NM_001033294.3; OTTMUST00000027596; OTTMUST00000027732; OTTMUST00000027733; OTTMUST00000027734; uc008izg.2	TC0200000495.mm.1	396.177	342.509	522.758	494.559	112.986	131.599	121.095	218.275	DEAD/H (Asp-Glu-Ala-Asp/His) box polypeptide 31	Multiple_Complex
Ttf1	NM_009442; ENSMUST00000100237; ENSMUST00000122866; ENSMUST00000130506; ENSMUST00000142786; BC059011; NM_009442.2; OTTMUST00000027759; OTTMUST00000027760; OTTMUST00000027761; OTTMUST00000077338; uc008izk.1	TC0200000499.mm.1	1370.04	1152.06	1217.75	1251.98	165.421	146.018	1937.53	639.145	transcription termination factor, RNA polymerase I	Multiple_Complex
Setx	NM_198033; ENSMUST00000061578; ENSMUST00000129544; ENSMUST00000135992; ENSMUST00000145422; ENSMUST00000154910; NM_198033.2; OTTMUST00000027763; OTTMUST00000027768; OTTMUST00000027769; OTTMUST00000027770; OTTMUST00000027771; uc008izl.1; uc008izm.1; uc008izn.1	TC0200000501.mm.1	8135.41	8135.41	9026.81	7912.95	3615.55	2194.99	5480.15	6295.04	senataxin	Multiple_Complex
Med27	NM_026896; ENSMUST00000028139; ENSMUST00000113830; ENSMUST00000123522; ENSMUST00000147547; ENSMUST00000159034; ENSMUST00000159280; ENSMUST00000162597; ENSMUST00000162603; ENSMUST00000162623; ENSMUST00000162773; BC016537; NM_026896.4; OTTMUST00000027868; OTTMUST00000028053; OTTMUST00000028055; OTTMUST00000028056; OTTMUST00000086748; OTTMUST00000086749; OTTMUST00000086750; OTTMUST00000086751; OTTMU…	TC0200000503.mm.1	1478.58	1370.04	1168.14	1226.22	1438.15	1296.13	2401.97	2005.85	mediator complex subunit 27	Multiple_Complex
Gm13401	ENSMUST00000117074	TC0200000506.mm.1	261.379	282.088	508.463	433.534	119.428	112.986	94.3532	98.36	predicted gene 13401 [Source:MGI Symbol;Acc:MGI:3649786]	Multiple_Complex
Rapgef1	NM_001039086; NM_001039087; NM_054050; ENSMUST00000091146; ENSMUST00000095087; ENSMUST00000102872; ENSMUST00000123953; ENSMUST00000137719; ENSMUST00000147488; ENSMUST00000147755; BC129881; NM_001039086.1; NM_001039087.1; NM_054050.2; OTTMUST00000028646; OTTMUST00000028647; OTTMUST00000028648; OTTMUST00000028649; OTTMUST00000028650; OTTMUST00000028651; OTTMUST00000028652; uc008izt.1; uc008izu.1; u…	TC0200000507.mm.1	85.0359	81.0084	86.8227	88.0347	142.025	109.137	86.2229	78.7932	Rap guanine nucleotide exchange factor (GEF) 1	Multiple_Complex
Gm13547	NM_001177392; ENSMUST00000113808; ENSMUST00000113809; ENSMUST00000113810; ENSMUST00000177379; NM_001177392.1; uc012btg.1	TC0200000509.mm.1	48.5029	46.5271	55.3304	55.3304	59.3016	64.8934	51.2685	41.3553	predicted gene 13547	Multiple_Complex
Coq4	NM_178693; ENSMUST00000028137; ENSMUST00000138233; ENSMUST00000142694; ENSMUST00000143616; ENSMUST00000148791; ENSMUST00000176348; BC139373; BC139376; NM_178693.4; OTTMUST00000030237; OTTMUST00000030238; OTTMUST00000083476; OTTMUST00000083477; OTTMUST00000083488; OTTMUST00000110251; uc008jac.1; uc008jad.1; uc008jae.1; uc012bti.1	TC0200000510.mm.1	592.224	494.559	617.374	572.051	216.767	227.544	233.941	380.038	coenzyme Q4 homolog (yeast)	Multiple_Complex
Slc27a4	NM_011989; ENSMUST00000080065; ENSMUST00000136444; BC023114; NM_011989.4; OTTMUST00000030248; OTTMUST00000030249; uc008jaf.1	TC0200000511.mm.1	249	252.476	254.232	227.544	60.5477	69.551	77.7085	99.7331	solute carrier family 27 (fatty acid transporter), member 4	Multiple_Complex
Urm1	NM_026615; ENSMUST00000091142; ENSMUST00000123021; ENSMUST00000130542; ENSMUST00000147325; ENSMUST00000149379; ENSMUST00000156944; BC026994; NM_026615.4; OTTMUST00000030242; OTTMUST00000030243; OTTMUST00000030244; OTTMUST00000030245; OTTMUST00000030246; OTTMUST00000030247; uc008jag.1; uc008jah.1	TC0200000512.mm.1	349.706	364.557	439.586	396.177	103.25	115.36	93.7015	103.968	ubiquitin related modifier 1 homolog (S. cerevisiae)	Multiple_Complex
Cercam	NM_207298; ENSMUST00000047521; ENSMUST00000134152; ENSMUST00000153863; ENSMUST00000154464; ENSMUST00000155355; BC138847; NM_207298.2; OTTMUST00000030256; OTTMUST00000030257; OTTMUST00000030258; OTTMUST00000030259; OTTMUST00000030260; uc008jai.1	TC0200000514.mm.1	94.3532	108.383	101.829	97.6806	55.3304	60.1295	56.1028	60.5477	cerebral endothelial cell adhesion molecule	Multiple_Complex
Odf2	NM_001113213; NM_001113214; NM_001177659; NM_001177661; NM_013615; ENSMUST00000028128; ENSMUST00000046571; ENSMUST00000113755; ENSMUST00000113756; ENSMUST00000113757; ENSMUST00000113759; ENSMUST00000113762; ENSMUST00000113763; ENSMUST00000113764; ENSMUST00000113765; ENSMUST00000113767; ENSMUST00000123335; ENSMUST00000126103; ENSMUST00000129960; ENSMUST00000130899; ENSMUST00000131165; ENSMUST00000…	TC0200000515.mm.1	515.561	501.463	398.932	407.315	1089.92	885.286	333.144	648.067	outer dense fiber of sperm tails 2	Multiple_Complex
Gle1	NM_028923; ENSMUST00000019859; ENSMUST00000123608; ENSMUST00000124687; ENSMUST00000127390; ENSMUST00000148983; ENSMUST00000149730; ENSMUST00000154490; BC026797; NM_028923.3; OTTMUST00000040476; OTTMUST00000040519; OTTMUST00000040520; OTTMUST00000040521; OTTMUST00000040522; OTTMUST00000040523; OTTMUST00000040524; uc008jap.2; uc008jaq.2	TC0200000517.mm.1	3956.48	4011.71	2936.74	2778.33	1629.26	1184.45	2740.08	3061.45	GLE1 RNA export mediator (yeast)	Multiple_Complex
Sptan1	NM_001076554; NM_001177667; NM_001177668; ENSMUST00000046257; ENSMUST00000095083; ENSMUST00000100225; ENSMUST00000113717; ENSMUST00000113719; ENSMUST00000113741; ENSMUST00000124494; ENSMUST00000129241; ENSMUST00000131827; ENSMUST00000143918; ENSMUST00000149038; ENSMUST00000149846; ENSMUST00000152453; BC150941; BC158015; BC172095; NM_001076554.2; NM_001177667.1; NM_001177668.1; OTTMUST00000040529;…	TC0200000518.mm.1	491.143	512	497.999	390.722	200.854	164.279	203.657	296.112	spectrin alpha, non-erythrocytic 1 (Sptan1), transcript variant 1, mRNA.; spectrin alpha, non-erythrocytic 1	Multiple_Complex
Set	NM_001204875; NM_023871; ENSMUST00000067996; ENSMUST00000102866; ENSMUST00000125824; ENSMUST00000134364; ENSMUST00000137291; ENSMUST00000147590; ENSMUST00000149578; BC018255; BC103791; NM_001204875.1; NM_023871.4; OTTMUST00000040518; OTTMUST00000040609; OTTMUST00000040610; OTTMUST00000040611; OTTMUST00000040612; OTTMUST00000040613; OTTMUST00000040614; uc008jaw.2; uc008jax.2; uc008jay.2	TC0200000522.mm.1	24322.4	23657.3	23493.9	20882.4	3191.46	3191.46	12161.2	9877.98	SET nuclear oncogene	Multiple_Complex
Pkn3	NM_153805; ENSMUST00000045246; ENSMUST00000125346; ENSMUST00000126838; ENSMUST00000134591; ENSMUST00000137240; ENSMUST00000148650; ENSMUST00000150770; ENSMUST00000156197; BC034126; NM_153805.1; OTTMUST00000040621; OTTMUST00000040622; OTTMUST00000040623; OTTMUST00000040624; OTTMUST00000040625; OTTMUST00000040626; OTTMUST00000040627; OTTMUST00000040628; uc008jaz.1; uc008jba.1; uc008jbb.1; uc008jbc.1	TC0200000523.mm.1	71.5064	70.0348	68.1197	75.5835	57.2816	55.3304	57.68	54.1917	protein kinase N3	Multiple_Complex
Tbc1d13	NM_146252; ENSMUST00000044556; ENSMUST00000125142; ENSMUST00000129789; ENSMUST00000131261; ENSMUST00000132324; ENSMUST00000134013; ENSMUST00000136183; ENSMUST00000150879; BC025586; NM_146252.2; OTTMUST00000040592; OTTMUST00000040593; OTTMUST00000040594; OTTMUST00000040595; OTTMUST00000040596; OTTMUST00000040597; OTTMUST00000040598; OTTMUST00000040599; uc008jbi.1; uc008jbj.1	TC0200000525.mm.1	413.001	388.023	464.65	477.713	415.873	340.144	245.572	315.173	TBC1 domain family, member 13	Multiple_Complex
Lrrc8a	NM_177725; ENSMUST00000095078; ENSMUST00000113654; NM_177725.4; OTTMUST00000040641; OTTMUST00000040642; uc008jbu.2	TC0200005466.mm.1	3040.3	3019.3	2134.97	1833.01	1341.84	1251.98	2368.9	2401.97	leucine rich repeat containing 8A	Multiple_Complex
Phyhd1	NM_001252568; NM_001252570; NM_001252571; NM_001281829; NM_172267; ENSMUST00000085290; ENSMUST00000091132; ENSMUST00000113643; ENSMUST00000113645; ENSMUST00000127689; ENSMUST00000129512; ENSMUST00000133877; ENSMUST00000138254; ENSMUST00000139719; ENSMUST00000147204; ENSMUST00000150695; ENSMUST00000154647; ENSMUST00000154988; BC132271; BC132273; BC145356; NM_001252568.1; NM_001252570.1; NM_0012525…	TC0200005467.mm.1	59.7141	60.9688	62.6829	57.2816	58.0812	58.4852	54.1917	54.9482	phytanoyl-CoA dioxygenase domain containing 1; phytanoyl-CoA dioxygenase domain containing 1 (Phyhd1), transcript variant 2, mRNA.	Multiple_Complex
Nup188	NM_198304; ENSMUST00000064447; ENSMUST00000113634; ENSMUST00000133421; ENSMUST00000133603; ENSMUST00000138666; ENSMUST00000148969; ENSMUST00000156023; BC096591; NM_198304.2; OTTMUST00000040702; OTTMUST00000040703; OTTMUST00000040704; OTTMUST00000040705; OTTMUST00000040706; OTTMUST00000040707; OTTMUST00000040708; uc008jbz.1; uc008jca.1; uc008jcb.1	TC0200005468.mm.1	576.03	600.491	451.944	388.023	198.088	164.279	1038.29	238.856	nucleoporin 188	Multiple_Complex
Fam73b	NM_001242407; NM_175392; ENSMUST00000077977; ENSMUST00000100214; ENSMUST00000116543; ENSMUST00000125610; ENSMUST00000127410; ENSMUST00000135841; ENSMUST00000137441; ENSMUST00000140075; ENSMUST00000142801; ENSMUST00000146308; ENSMUST00000175864; ENSMUST00000176517; BC051404; NM_001242407.1; NM_175392.3; OTTMUST00000040765; OTTMUST00000040766; OTTMUST00000040767; OTTMUST00000040768; OTTMUST00000040…	TC0200000532.mm.1	85.0359	85.6274	84.4485	84.4485	56.1028	59.7141	58.0812	52.7098	family with sequence similarity 73, member B	Multiple_Complex
Dolpp1	NM_020329; ENSMUST00000028209; ENSMUST00000113612; ENSMUST00000123202; ENSMUST00000133991; ENSMUST00000137248; ENSMUST00000151018; ENSMUST00000152303; ENSMUST00000155196; ENSMUST00000156059; ENSMUST00000156704; ENSMUST00000156984; BC026544; NM_020329.3; OTTMUST00000040784; OTTMUST00000040785; OTTMUST00000040786; OTTMUST00000040787; OTTMUST00000040788; OTTMUST00000040789; OTTMUST00000040790; OTTMU…	TC0200000533.mm.1	51.2685	52.7098	52.3457	49.18	41.9326	45.5696	41.0696	41.0696	dolichyl pyrophosphate phosphatase 1	Multiple_Complex
Ppp2r4	NM_138748; ENSMUST00000042055; ENSMUST00000113601; ENSMUST00000113603; ENSMUST00000125561; ENSMUST00000125743; ENSMUST00000128516; ENSMUST00000130741; ENSMUST00000131476; ENSMUST00000135105; ENSMUST00000136009; ENSMUST00000137741; ENSMUST00000152165; ENSMUST00000159932; BC006626; BC052852; NM_138748.5; OTTMUST00000040773; OTTMUST00000040774; OTTMUST00000040775; OTTMUST00000040776; OTTMUST00000040…	TC0200000535.mm.1	461.44	410.148	537.455	675.588	374.806	380.038	249	181.019	protein phosphatase 2A activator, regulatory subunit B; protein phosphatase 2A, regulatory subunit B (PR 53)	Multiple_Complex
Cstad	NM_030137; ENSMUST00000102853; ENSMUST00000129719; BC117017; BC117019; NM_030137.2; OTTMUST00000040798; OTTMUST00000040799; uc008jcp.1	TC0200000538.mm.1	19.1597	18.8959	23.7524	23.4254	22.4711	34.7755	27.4741	18.3792	CSA-conditional, T cell activation-dependent protein	Multiple_Complex
Ntmt1	NM_170592; ENSMUST00000041830; ENSMUST00000126037; ENSMUST00000127566; ENSMUST00000128303; ENSMUST00000128509; ENSMUST00000129712; ENSMUST00000138889; ENSMUST00000143970; ENSMUST00000152374; BC027220; NM_170592.2; OTTMUST00000027955; OTTMUST00000027956; OTTMUST00000027957; OTTMUST00000027958; OTTMUST00000027959; OTTMUST00000027960; OTTMUST00000027961; OTTMUST00000027962; OTTMUST00000027963; uc008…	TC0200000542.mm.1	2120.22	2062.24	1910.85	1897.65	230.72	176.069	410.148	661.685	N-terminal Xaa-Pro-Lys N-methyltransferase 1	Multiple_Complex
Prrx2	NM_009116; ENSMUST00000041659; ENSMUST00000113592; ENSMUST00000137924; ENSMUST00000150299; BC137872; BC137874; NM_009116.2; OTTMUST00000027964; OTTMUST00000027965; OTTMUST00000027966; OTTMUST00000027967; uc008jcy.2	TC0200000543.mm.1	70.5219	82.7106	72.5046	69.0706	61.3929	53.4456	61.3929	66.7178	paired related homeobox 2	Multiple_Complex
Tor1b	NM_133673; ENSMUST00000028199; ENSMUST00000132514; ENSMUST00000133544; ENSMUST00000135507; ENSMUST00000155213; ENSMUST00000156711; BC018456; NM_133673.3; OTTMUST00000027995; OTTMUST00000027996; OTTMUST00000027997; OTTMUST00000027998; OTTMUST00000027999; OTTMUST00000028001; uc008jda.1; uc008jdb.1	TC0200000545.mm.1	4870.99	4299.64	6080.61	5595.3	302.334	249	1260.69	803.414	torsin family 1, member B	Multiple_Complex
Usp20	NM_028846; ENSMUST00000061544; ENSMUST00000102849; ENSMUST00000125601; ENSMUST00000127776; ENSMUST00000128295; ENSMUST00000136588; ENSMUST00000138161; ENSMUST00000142232; ENSMUST00000154351; ENSMUST00000154634; ENSMUST00000170476; BC079674; NM_028846.5; OTTMUST00000027968; OTTMUST00000027969; OTTMUST00000027970; OTTMUST00000027971; OTTMUST00000027972; OTTMUST00000027973; OTTMUST00000027974; OTTMU…	TC0200000546.mm.1	165.421	153.277	133.436	147.033	114.563	117.784	113.772	130.69	ubiquitin specific peptidase 20	Multiple_Complex
Gpr107	NM_178760; ENSMUST00000056433; ENSMUST00000127872; ENSMUST00000133207; ENSMUST00000146747; ENSMUST00000147099; ENSMUST00000149622; ENSMUST00000151991; ENSMUST00000153032; ENSMUST00000164324; ENSMUST00000169333; ENSMUST00000172422; BC092231; BC117900; BC117901; NM_178760.4; OTTMUST00000028145; OTTMUST00000028146; OTTMUST00000028147; OTTMUST00000028148; OTTMUST00000028150; OTTMUST00000028151; OTTMU…	TC0200000547.mm.1	140.07	125.366	127.116	126.238	56.1028	70.5219	66.7178	95.0095	G protein-coupled receptor 107	Multiple_Complex
Ncs1	NM_019681; ENSMUST00000000199; ENSMUST00000150670; BC059825; NM_019681.3; OTTMUST00000028142; OTTMUST00000028279; uc008jdq.1	TC0200000549.mm.1	24.9333	27.4741	27.4741	25.6342	29.8571	39.9466	25.9921	22.1618	neuronal calcium sensor 1	Multiple_Complex
Hmcn2	OTTMUST00000028289; OTTMUST00000028510; OTTMUST00000028511; OTTMUST00000028512; OTTMUST00000083228; XM_003084486.2; uc008jds.3; uc008jdt.3	TC0200000550.mm.1	23.1029	23.1029	23.7524	24.9333	28.6408	30.2738	28.443	24.9333	hemicentin 2	Multiple_Complex
Ass1; Gm5424	NM_007494; NR_002687; ENSMUST00000102840; ENSMUST00000126474; ENSMUST00000130195; BC002074; BC087556; NM_007494.3; OTTMUST00000028752; OTTMUST00000028753; OTTMUST00000028754; uc008jdu.1	TC0200000551.mm.1	41.3553	39.6706	35.7532	37.7918	66.257	77.7085	42.5179	67.6492	argininosuccinate synthetase 1; argininosuccinate synthase pseudogene	Multiple_Complex
Fubp3	NM_001033389; ENSMUST00000055244; ENSMUST00000113482; ENSMUST00000129903; ENSMUST00000130578; ENSMUST00000132534; ENSMUST00000134553; ENSMUST00000137504; ENSMUST00000137889; ENSMUST00000150473; ENSMUST00000154050; NM_001033389.3; OTTMUST00000028725; OTTMUST00000028726; OTTMUST00000028727; OTTMUST00000028728; OTTMUST00000028729; OTTMUST00000028730; OTTMUST00000028731; OTTMUST00000028732; OTTMUST00…	TC0200000552.mm.1	304.437	317.365	290.018	249	125.366	142.025	210.839	170.072	far upstream element (FUSE) binding protein 3	Multiple_Complex
Gm13424	ENSMUST00000122301	TC0200000556.mm.1	36.5044	34.0598	40.2244	45.2548	41.9326	49.18	45.5696	53.0765	predicted gene 13424 [Source:MGI Symbol;Acc:MGI:3649648]	Multiple_Complex
Exosc2	NM_144886; ENSMUST00000038474; ENSMUST00000125883; ENSMUST00000137156; ENSMUST00000146135; ENSMUST00000149094; BC021485; BC021807; NM_144886.2; OTTMUST00000028734; OTTMUST00000028735; OTTMUST00000028736; OTTMUST00000028737; OTTMUST00000028738; uc008jdy.1	TC0200000557.mm.1	942.272	903.888	910.175	770.686	200.854	165.421	333.144	1038.29	exosome component 2	Multiple_Complex
Abl1	NM_001112703; NM_001283045; NM_001283046; NM_001283047; NM_009594; ENSMUST00000028190; ENSMUST00000075759; ENSMUST00000123471; ENSMUST00000124089; ENSMUST00000124726; ENSMUST00000127714; ENSMUST00000135233; ENSMUST00000137049; ENSMUST00000142554; ENSMUST00000146537; ENSMUST00000156736; BC059260; BC103770; NM_001112703.1; NM_009594.3; OTTMUST00000028740; OTTMUST00000028741; OTTMUST00000028742; OTT…	TC0200000558.mm.1	481.036	537.455	634.73	560.278	734.185	560.278	141.044	357.054	c-abl oncogene 1, non-receptor tyrosine kinase; v-abl Abelson murine leukemia oncogene 1; c-abl oncogene 1, non-receptor tyrosine kinase (Abl1), transcript variant 1, mRNA.	Multiple_Complex
Lamc3	NM_011836; ENSMUST00000028187; ENSMUST00000135995; ENSMUST00000138325; BC096366; NM_011836.3; OTTMUST00000029119; OTTMUST00000029120; OTTMUST00000029121; uc008jef.1; uc012btp.1	TC0200000559.mm.1	31.5594	29.6508	31.125	32	32	32.4467	32.4467	30.91	laminin gamma 3	Multiple_Complex
Aif1l	NM_145144; ENSMUST00000001920; ENSMUST00000125457; ENSMUST00000128271; ENSMUST00000138833; ENSMUST00000140649; ENSMUST00000145137; ENSMUST00000148056; ENSMUST00000151276; ENSMUST00000156564; ENSMUST00000156743; BC024599; NM_145144.1; OTTMUST00000029108; OTTMUST00000029109; OTTMUST00000029110; OTTMUST00000029111; OTTMUST00000029112; OTTMUST00000029113; OTTMUST00000029114; OTTMUST00000029115; OTTMU…	TC0200000561.mm.1	85.6274	89.2636	85.0359	92.4115	54.9482	67.6492	68.5935	92.4115	allograft inflammatory factor 1-like	Multiple_Complex
Nup214; Mir7674	NM_172268; NR_106135; ENSMUST00000065398; ENSMUST00000123062; ENSMUST00000124455; ENSMUST00000126301; ENSMUST00000129496; ENSMUST00000130185; ENSMUST00000130975; ENSMUST00000138012; ENSMUST00000146138; ENSMUST00000152791; ENSMUST00000153096; BC039282; NM_172268.2; OTTMUST00000031160; OTTMUST00000031161; OTTMUST00000031162; OTTMUST00000031163; OTTMUST00000031164; OTTMUST00000031165; OTTMUST0000003…	TC0200000562.mm.1	10809.4	12331	8480.89	7033.37	13493.7	7643.41	13216	11190.6	nucleoporin 214; microRNA 7674	Multiple_Complex
Plpp7	NM_145521; ENSMUST00000057423; ENSMUST00000140762; ENSMUST00000146502; BC016136; OTTMUST00000031093; OTTMUST00000031094; OTTMUST00000031095	TC0200000566.mm.1	67.6492	71.5064	60.1295	67.1819	66.257	65.3448	50.9143	66.257	phospholipid phosphatase 7 (inactive)	Multiple_Complex
Prrc2b	NM_001159634; NM_172661; ENSMUST00000036691; ENSMUST00000069817; ENSMUST00000123270; ENSMUST00000128936; ENSMUST00000129626; ENSMUST00000132459; ENSMUST00000137551; ENSMUST00000140015; ENSMUST00000141053; ENSMUST00000142219; ENSMUST00000156313; BC055116; NM_001159634.1; NM_172661.3; OTTMUST00000031112; OTTMUST00000031113; OTTMUST00000031114; OTTMUST00000031115; OTTMUST00000031116; OTTMUST00000031…	TC0200000567.mm.1	108.383	121.095	130.69	126.238	62.6829	65.3448	75.5835	55.3304	proline-rich coiled-coil 2B	Multiple_Complex
Pomt1	NM_145145; ENSMUST00000036473; ENSMUST00000123740; ENSMUST00000126784; ENSMUST00000129163; ENSMUST00000132516; ENSMUST00000132853; ENSMUST00000138000; ENSMUST00000146485; ENSMUST00000151598; ENSMUST00000154684; BC027325; NM_145145.1; OTTMUST00000031122; OTTMUST00000031123; OTTMUST00000031124; OTTMUST00000031125; OTTMUST00000031126; OTTMUST00000031127; OTTMUST00000031128; OTTMUST00000031129; OTTMU…	TC0200000572.mm.1	48.8403	62.2499	45.8866	41.3553	46.8507	42.8137	38.3193	38.3193	protein-O-mannosyltransferase 1	Multiple_Complex
Golga2	NM_001080968; NM_133852; ENSMUST00000081670; ENSMUST00000100194; ENSMUST00000113377; ENSMUST00000126276; ENSMUST00000127276; ENSMUST00000129193; ENSMUST00000131712; ENSMUST00000133113; ENSMUST00000139494; ENSMUST00000146544; ENSMUST00000147707; ENSMUST00000149141; BC011407; NM_001080968.1; NM_133852.2; OTTMUST00000031188; OTTMUST00000031189; OTTMUST00000031190; OTTMUST00000031191; OTTMUST00000031…	TC0200000574.mm.1	263.197	276.282	230.72	218.275	216.767	160.898	138.141	213.783	golgi autoantigen, golgin subfamily a, 2	Multiple_Complex
Ciz1	NM_001252534; NM_001252536; NM_001252537; NM_001252538; NM_028412; ENSMUST00000048964; ENSMUST00000113331; ENSMUST00000113332; ENSMUST00000113334; ENSMUST00000113338; ENSMUST00000125482; ENSMUST00000125769; ENSMUST00000125818; ENSMUST00000131152; ENSMUST00000132028; ENSMUST00000132290; ENSMUST00000134141; ENSMUST00000136079; ENSMUST00000136325; ENSMUST00000137220; ENSMUST00000139637; ENSMUST00000…	TC0200000577.mm.1	91.1392	97.6806	114.563	115.36	77.7085	78.7932	158.683	58.4852	CDKN1A interacting zinc finger protein 1; CDKN1A interacting zinc finger protein	Multiple_Complex
Ptges2	NM_133783; ENSMUST00000028162; ENSMUST00000123714; ENSMUST00000130121; BC004846; NM_133783.2; OTTMUST00000028365; OTTMUST00000028366; OTTMUST00000028367; uc008jfm.2	TC0200000578.mm.1	88.0347	95.0095	105.42	111.43	101.829	98.36	102.537	89.2636	prostaglandin E synthase 2	Multiple_Complex
Fam102a	NM_153560; ENSMUST00000048375; ENSMUST00000133366; ENSMUST00000133512; ENSMUST00000136816; ENSMUST00000147723; BC023752; BC031157; NM_153560.4; OTTMUST00000028370; OTTMUST00000028371; OTTMUST00000028372; OTTMUST00000028373; OTTMUST00000028374; uc008jft.1; uc008jfs.1	TC0200000585.mm.1	2401.97	2164.77	2683.69	2817.11	2556.58	1858.6	1871.53	2503.97	family with sequence similarity 102, member A; family with sequence similarity 102, member A (Fam102a), mRNA.	Multiple_Complex
Dpm2	NM_010073; ENSMUST00000028151; ENSMUST00000128039; ENSMUST00000140592; ENSMUST00000150419; BC008256; NM_010073.2; OTTMUST00000028375; OTTMUST00000028376; OTTMUST00000028377; OTTMUST00000028378; uc008jfu.1	TC0200005469.mm.1	73.5167	73.0089	56.493	61.3929	54.5686	47.5048	61.3929	70.5219	dolichol-phosphate (beta-D) mannosyltransferase 2	Multiple_Complex
Pip5kl1	NM_198191; ENSMUST00000055304; ENSMUST00000100188; ENSMUST00000124980; BC094346; BC117018; BC119037; NM_198191.2; OTTMUST00000028354; OTTMUST00000028355; OTTMUST00000028356; uc008jfv.1; uc008jfw.1	TC0200005470.mm.1	22.4711	22.0087	25.4572	25.1067	32.4467	36.7583	31.3414	24.761	phosphatidylinositol-4-phosphate 5-kinase-like 1	Multiple_Complex
St6galnac6; St6galnac4	NM_001025310; NM_001025311; NM_001276425; NM_001289547; NM_001289548; NM_001289549; NM_011373; NM_016973; NR_110347; ENSMUST00000072111; ENSMUST00000081879; ENSMUST00000095044; ENSMUST00000095045; ENSMUST00000102818; ENSMUST00000113289; ENSMUST00000113290; ENSMUST00000123080; ENSMUST00000126636; ENSMUST00000128811; ENSMUST00000129165; ENSMUST00000131229; ENSMUST00000140983; ENSMUST00000143625; EN…	TC0200000587.mm.1	49.8665	49.5221	48.8403	48.1679	42.2243	41.0696	40.2244	44.3235	ST6 (alpha-N-acetyl-neuraminyl-2,3-beta-galactosyl-1,3)-N-acetylgalactosaminide alpha-2,6-sialyltransferase 6; ST6 (alpha-N-acetyl-neuraminyl-2,3-beta-galactosyl-1,3)-N-acetylgalactosaminide alpha-2,6-sialyltransferase 4; (alpha-N-acetyl-neuraminyl-2,3-beta-galactosyl-1,3)-N-acetylgalactosaminide alpha-2,6-sialyltransferase 6; ST6 (alpha-N-acetyl-neuraminyl-2,3-beta-galactosyl-1, 3)-N-acetylgalac…	Multiple_Complex
Ak1	NM_001198790; NM_001198791; NM_001198792; NM_021515; ENSMUST00000068271; ENSMUST00000113277; ENSMUST00000113278; ENSMUST00000135392; ENSMUST00000156578; BC014802; BC054366; NM_001198790.1; NM_001198791.1; NM_001198792.1; NM_021515.3; OTTMUST00000028357; OTTMUST00000028358; OTTMUST00000028359; OTTMUST00000028360; OTTMUST00000028361; uc008jgh.2; uc008jgi.2; uc008jgj.2; uc012btw.1	TC0200005471.mm.1	33.1285	37.2715	31.5594	36.7583	46.2057	37.7918	40.2244	34.7755	adenylate kinase 1	Multiple_Complex
Eng	NM_001146348; NM_001146350; NM_007932; ENSMUST00000009705; ENSMUST00000113272; ENSMUST00000138600; ENSMUST00000139770; ENSMUST00000156306; ENSMUST00000167841; BC029080; NM_001146348.1; NM_001146350.1; NM_007932.2; OTTMUST00000028346; OTTMUST00000028347; OTTMUST00000028348; OTTMUST00000028349; OTTMUST00000028350; uc008jgk.2; uc008jgl.2; uc012btx.1	TC0200005472.mm.1	29.446	31.779	33.3589	33.8246	28.2465	35.0174	30.6965	23.1029	endoglin	Multiple_Complex
Sh2d3c	NM_001252547; NM_013781; NR_045535; ENSMUST00000074248; ENSMUST00000113242; ENSMUST00000124133; ENSMUST00000131101; ENSMUST00000139563; ENSMUST00000141670; BC113203; NM_001252547.1; NM_013781.3; NR_045535.1; OTTMUST00000029789; OTTMUST00000029790; OTTMUST00000029791; OTTMUST00000029792; OTTMUST00000030034; OTTMUST00000030035; uc008jgp.2; uc008jgq.2; uc008jgr.2	TC0200000591.mm.1	1499.22	1389.16	1341.84	1234.75	572.051	617.374	803.414	910.175	SH2 domain containing 3C	Multiple_Complex
Tor2a	NM_152800; NR_045485; ENSMUST00000009707; ENSMUST00000123624; ENSMUST00000140999; ENSMUST00000149720; ENSMUST00000149987; ENSMUST00000156617; ENSMUST00000175763; ENSMUST00000177382; BC003466; BC024469; NM_152800.3; NR_045485.1; OTTMUST00000029816; OTTMUST00000029817; OTTMUST00000029818; OTTMUST00000029819; OTTMUST00000029821; OTTMUST00000091883; OTTMUST00000110829; OTTMUST00000110830; uc008jgs.2;…	TC0200000592.mm.1	948.826	867.067	820.296	776.047	178.527	173.645	146.018	340.144	torsin family 2, member A	Multiple_Complex
Ptrh1	NM_178595; ENSMUST00000066352; ENSMUST00000138214; BC098218; NM_178595.3; OTTMUST00000029803; OTTMUST00000029804; uc008jgx.1; uc008jgy.1	TC0200000593.mm.1	6382.92	5634.22	3929.15	3350.13	652.575	873.098	1136.2	1389.16	peptidyl-tRNA hydrolase 1 homolog (S. cerevisiae)	Multiple_Complex
Fam129b	NM_146119; ENSMUST00000028135; ENSMUST00000125347; ENSMUST00000138781; ENSMUST00000150875; ENSMUST00000151607; ENSMUST00000154514; BC027843; NM_146119.2; OTTMUST00000029853; OTTMUST00000029854; OTTMUST00000029855; OTTMUST00000029856; OTTMUST00000029857; OTTMUST00000029858; uc008jhc.2	TC0200000597.mm.1	23.5883	26.9087	27.6652	25.8125	28.0514	28.443	28.443	25.6342	family with sequence similarity 129, member B	Multiple_Complex
Rpl12; Snora65	NM_009076; NR_002898; ENSMUST00000102811; ENSMUST00000125415; ENSMUST00000126610; ENSMUST00000133842; ENSMUST00000134912; ENSMUST00000144644; ENSMUST00000154340; BC018321; BC081469; BC090393; NM_009076.3; NR_002898.2; OTTMUST00000029954; OTTMUST00000029955; OTTMUST00000029956; OTTMUST00000029957; OTTMUST00000029958; OTTMUST00000029959; OTTMUST00000029960; uc008jhe.2; uc012bub.1	TC0200000600.mm.1	209.383	206.5	209.383	210.839	82.7106	66.257	178.527	162.017	ribosomal protein L12; small nucleolar RNA, H/ACA box 65	Multiple_Complex
Angptl2	NM_011923; ENSMUST00000004208; ENSMUST00000139148; ENSMUST00000143252; BC138609; BC138610; NM_011923.4; OTTMUST00000029972; OTTMUST00000029973; OTTMUST00000029974; uc008jhp.1; uc008jhr.1	TC0200000603.mm.1	71.5064	72.5046	54.9482	64.4452	95.0095	70.5219	130.69	110.661	angiopoietin-like 2	Multiple_Complex
Mapkap1	NM_177345; ENSMUST00000040459; ENSMUST00000113123; ENSMUST00000113124; ENSMUST00000113126; ENSMUST00000124443; ENSMUST00000129633; ENSMUST00000137021; ENSMUST00000138933; ENSMUST00000141253; ENSMUST00000147337; ENSMUST00000149383; ENSMUST00000156967; BC090644; BC096618; NM_177345.3; OTTMUST00000028215; OTTMUST00000028216; OTTMUST00000028217; OTTMUST00000028218; OTTMUST00000028219; OTTMUST00000028…	TC0200000612.mm.1	1408.55	1370.04	1105.13	1024	1234.75	809.002	1770.57	1595.73	mitogen-activated protein kinase associated protein 1	Multiple_Complex
Hspa5	NM_001163434; NM_022310; ENSMUST00000028222; ENSMUST00000100171; ENSMUST00000129333; ENSMUST00000137145; ENSMUST00000137505; ENSMUST00000145466; ENSMUST00000148308; ENSMUST00000155595; BC050927; NM_001163434.1; NM_022310.3; OTTMUST00000028494; OTTMUST00000028495; OTTMUST00000028496; OTTMUST00000028497; OTTMUST00000028498; OTTMUST00000028499; OTTMUST00000028500; OTTMUST00000028501; uc008jis.2; uc0…	TC0200000620.mm.1	968.763	910.175	948.826	867.067	396.177	308.687	837.532	560.278	heat shock protein 5; heat shock 70kD protein 5 (glucose-regulated protein)	Multiple_Complex
Cutal	NM_030021; ENSMUST00000028228; ENSMUST00000047447; ENSMUST00000113068; ENSMUST00000149250; ENSMUST00000184164; BC021771; NM_030021.2; OTTMUST00000028535; OTTMUST00000028536; OTTMUST00000028537; OTTMUST00000028538; uc008jjf.1; uc008jjg.1	TC0200000626.mm.1	27.0958	28.2465	27.0958	25.9921	37.2715	31.5594	27.8576	25.9921	cutA divalent cation tolerance homolog-like	Multiple_Complex
Cntrl	NM_012018; ENSMUST00000028235; ENSMUST00000028237; ENSMUST00000113032; ENSMUST00000113033; ENSMUST00000113034; ENSMUST00000113037; ENSMUST00000123884; ENSMUST00000124081; ENSMUST00000130457; ENSMUST00000143807; ENSMUST00000150807; ENSMUST00000156933; BC158010; OTTMUST00000029284; OTTMUST00000029285; OTTMUST00000029286; OTTMUST00000030118; OTTMUST00000030119; OTTMUST00000030265; OTTMUST00000030267…	TC0200000634.mm.1	88.0347	93.0542	67.1819	68.1197	86.8227	67.6492	51.6251	109.137	centriolin	Multiple_Complex
Gsn	NM_001206367; NM_001206368; NM_001206369; NM_146120; ENSMUST00000028239; ENSMUST00000124323; ENSMUST00000139867; ENSMUST00000142324; BC023143; BC060377; NM_001206367.1; NM_001206368.1; NM_001206369.1; NM_146120.4; OTTMUST00000028765; OTTMUST00000030967; OTTMUST00000030968; OTTMUST00000030969; uc008jkc.2; uc008jkd.2; uc008jke.2; uc008jkf.1; uc008jkg.2	TC0200000636.mm.1	24.59	24.9333	26.7228	26.1729	31.5594	32.6724	31.125	27.8576	gelsolin	Multiple_Complex
Dab2ip	NM_001001602; NM_001114124; NM_001114125; ENSMUST00000065001; ENSMUST00000091010; ENSMUST00000112981; ENSMUST00000112983; ENSMUST00000112986; ENSMUST00000112987; ENSMUST00000112992; ENSMUST00000124098; ENSMUST00000135741; ENSMUST00000138957; ENSMUST00000145698; ENSMUST00000156465; ENSMUST00000156669; BC118530; NM_001001602.2; NM_001114124.1; NM_001114125.1; OTTMUST00000028984; OTTMUST00000029170;…	TC0200000641.mm.1	44.9422	47.1766	48.5029	49.8665	53.8174	60.5477	44.0173	44.3235	disabled 2 interacting protein	Multiple_Complex
Mrrf	NM_026422; ENSMUST00000028250; ENSMUST00000132042; ENSMUST00000162490; BC019787; NM_026422.2; OTTMUST00000028782; OTTMUST00000028783; OTTMUST00000087562; uc008jlj.2	TC0200000647.mm.1	118.603	113.772	88.647	76.6386	56.493	60.1295	84.4485	196.72	mitochondrial ribosome recycling factor	Multiple_Complex
Ptgs1	NM_008969; ENSMUST00000062069; ENSMUST00000133777; ENSMUST00000144319; ENSMUST00000149930; ENSMUST00000151351; BC005573; BC023322; NM_008969.3; OTTMUST00000028971; OTTMUST00000028972; OTTMUST00000028973; OTTMUST00000028974; OTTMUST00000028975; uc008jll.1	TC0200000651.mm.1	17.1484	15.6707	17.6305	18.2522	23.7524	23.5883	31.3414	18.3792	prostaglandin-endoperoxide synthase 1	Multiple_Complex
Olfr334-ps1	OTTMUST00000028966	TC0200000653.mm.1	26.7228	24.59	37.014	30.2738	64.8934	54.5686	64	35.5062	olfactory receptor 334, pseudogene 1	Multiple_Complex
Mir684-1; Gm13430	NR_030454_5; XR_104680.1; uc012bup.1	TC0200000658.mm.1	19484	19484	24491.6	23987.6	5792.62	5873.48	8659.09	9152.82	microRNA 684-1 (Mir684-1), microRNA.; predicted gene 13430; microRNA 684-1	Multiple_Complex
Olfr343-ps1	OTTMUST00000029069	TC0200000662.mm.1	12.8171	14.42	19.0273	17.5087	24.59	38.5859	25.1067	12.295	olfactory receptor 343, pseudogene 1	Multiple_Complex
Gm13438	ENSMUST00000120100	TC0200000667.mm.1	14.9285	16.3362	26.9087	18.2522	19.1597	23.1029	29.0406	17.0299	predicted gene 13438 [Source:MGI Symbol;Acc:MGI:3650785]	Multiple_Complex
Olfr349-ps1	OTTMUST00000029078	TC0200000670.mm.1	9.64646	14.1232	12.996	12.3805	15.2422	21.5557	18.0009	12.8171	olfactory receptor 349, pseudogene 1	Multiple_Complex
Gm13439	ENSMUST00000117541	TC0200000677.mm.1	37.2715	33.5909	41.9326	44.3235	43.1115	43.4113	46.8507	36.2523	predicted gene 13439 [Source:MGI Symbol;Acc:MGI:3650780]	Multiple_Complex
Olfr367-ps	NM_001081010; ENSMUST00000054726; NM_001081010.2; OTTMUST00000028982; OTTMUST00000029091; uc012buq.1	TC0200000683.mm.1	18.6357	21.5557	25.9921	23.4254	27.2843	59.7141	36.0019	21.5557	olfactory receptor 367, pseudogene	Multiple_Complex
Rabgap1; Gpr21	NM_001033960; NM_146121; NM_177383; ENSMUST00000061179; ENSMUST00000065441; ENSMUST00000066055; ENSMUST00000112920; ENSMUST00000130601; ENSMUST00000133434; ENSMUST00000148470; ENSMUST00000153145; ENSMUST00000159092; ENSMUST00000159737; BC112377; BC138337; NM_001033960.1; NM_146121.2; NM_177383.4; OTTMUST00000030109; OTTMUST00000030110; OTTMUST00000030111; OTTMUST00000030112; OTTMUST00000030113; O…	TC0200000686.mm.1	333.144	302.334	300.246	276.282	300.246	247.28	196.72	315.173	RAB GTPase activating protein 1; G protein-coupled receptor 21	Multiple_Complex
Gm13543	ENSMUST00000121230	TC0200000693.mm.1	50.5626	54.1917	60.5477	61.8199	85.0359	95.6704	60.5477	45.5696	predicted gene 13543 [Source:MGI Symbol;Acc:MGI:3649448]	Multiple_Complex
Crb2	NM_001163566; ENSMUST00000050372; ENSMUST00000137693; ENSMUST00000147600; NM_001163566.1; OTTMUST00000030341; OTTMUST00000030342; OTTMUST00000030343; uc008jnf.2	TC0200000694.mm.1	23.9176	23.9176	27.4741	26.1729	28.0514	33.1285	35.0174	27.6652	crumbs family member 2; crumbs homolog 2 (Drosophila)	Multiple_Complex
Lhx2	NM_010710; ENSMUST00000000253; ENSMUST00000133661; ENSMUST00000143783; ENSMUST00000149664; ENSMUST00000155964; ENSMUST00000175896; ENSMUST00000176229; BC055741; NM_010710.3; OTTMUST00000030849; OTTMUST00000030850; OTTMUST00000030851; OTTMUST00000030852; OTTMUST00000030853; OTTMUST00000103343; OTTMUST00000103344	TC0200000697.mm.1	57.2816	51.6251	54.9482	57.2816	88.647	65.3448	51.9842	51.6251	LIM homeobox protein 2	Multiple_Complex
Gm13586	ENSMUST00000121784	TC0200000705.mm.1	5518.27	5367.37	5914.33	6793.79	1067.48	625.992	2574.36	2120.22	predicted gene 13586 [Source:MGI Symbol;Acc:MGI:3649994]	Multiple_Complex
Adgrd2-ps	OTTMUST00000030836	TC0200000706.mm.1	32.6724	31.779	34.7755	37.2715	39.3966	46.2057	41.6429	34.5353	adhesion G protein-coupled receptor D2, pseudogene	Multiple_Complex
Rpl15-ps4	OTTMUST00000030874	TC0200000708.mm.1	21.5557	22.3159	27.6652	36.2523	21.1121	17.2677	17.3878	16.7955	ribosomal protein L15, pseudogene 4	Multiple_Complex
Olfml2a	NM_172854; ENSMUST00000057279; BC137871; NM_172854.2; OTTMUST00000029018; uc008jnv.1	TC0200000714.mm.1	42.5179	39.6706	44.3235	61.8199	56.8859	54.1917	39.1245	29.2426	olfactomedin-like 2A	Multiple_Complex
Gm13473	ENSMUST00000119289	TC0200000715.mm.1	75.5835	77.7085	97.6806	94.3532	127.116	152.219	117.784	95.6704	predicted gene 13473 [Source:MGI Symbol;Acc:MGI:3652338]	Multiple_Complex
Gm13474	ENSMUST00000122466	TC0200000717.mm.1	115.36	150.123	85.6274	106.891	91.7731	81.5719	75.5835	177.294	predicted gene 13474 [Source:MGI Symbol;Acc:MGI:3652316]	Multiple_Complex
Wdr38	NM_029687; ENSMUST00000039535; ENSMUST00000112872; ENSMUST00000124062; BC115629; NM_029687.3; OTTMUST00000029382; OTTMUST00000029383; OTTMUST00000029384; uc008jnw.1; uc008jnx.2	TC0200000718.mm.1	58.4852	55.7152	60.5477	64.4452	48.1679	54.5686	45.5696	60.9688	WD repeat domain 38; WD repeat domain 38 (Wdr38), mRNA.	Multiple_Complex
Arpc5l	NM_028809; ENSMUST00000090993; ENSMUST00000112862; ENSMUST00000135049; ENSMUST00000141467; BC024482; NM_028809.1; OTTMUST00000029542; OTTMUST00000029543; OTTMUST00000029668; uc008joa.1	TC0200000719.mm.1	2876.3	3191.46	2759.13	2336.28	2288.2	1871.53	1652	2778.33	actin related protein 2/3 complex, subunit 5-like	Multiple_Complex
Vmn2r-ps2	OTTMUST00000029629	TC0200000722.mm.1	12.1257	11.3137	13.0864	13.2691	14.6213	12.7286	19.2929	12.3805	vomeronasal 2, receptor, pseudogene 2	Multiple_Complex
Gm13506	ENSMUST00000120391	TC0200000724.mm.1	21.259	20.393	25.1067	27.6652	27.8576	30.4844	54.5686	31.125	predicted gene 13506 [Source:MGI Symbol;Acc:MGI:3649429]	Multiple_Complex
Gm13452	ENSMUST00000120896	TC0200000725.mm.1	16.3362	16.9123	15.3482	19.9733	23.4254	29.8571	39.3966	17.5087	predicted gene 13452 [Source:MGI Symbol;Acc:MGI:3651621]	Multiple_Complex
Gm13457	ENSMUST00000117885	TC0200000727.mm.1	25.9921	27.6652	42.8137	40.2244	101.125	103.25	62.2499	26.9087	predicted gene 13457 [Source:MGI Symbol;Acc:MGI:3651864]	Multiple_Complex
Gm13455	ENSMUST00000118767	TC0200000728.mm.1	14.0257	14.9285	14.1232	14.2215	16.9123	16.4498	16.9123	12.2101	predicted gene 13455 [Source:MGI Symbol;Acc:MGI:3652077]	Multiple_Complex
Gm13456	ENSMUST00000118928	TC0200000730.mm.1	217401	212927	265803	275177	194579	175365	207105	190575	predicted gene 13456 [Source:MGI Symbol;Acc:MGI:3651389]	Multiple_Complex
Gm13462	ENSMUST00000121472	TC0200000732.mm.1	53.4456	53.0765	48.8403	51.6251	50.2134	44.0173	133.436	85.6274	predicted gene 13462 [Source:MGI Symbol;Acc:MGI:3649843]	Multiple_Complex
Gm13460	ENSMUST00000121274	TC0200000733.mm.1	22.6274	24.2515	24.2515	21.8566	26.9087	29.446	42.2243	29.2426	predicted gene 13460 [Source:MGI Symbol;Acc:MGI:3650104]	Multiple_Complex
Gm13463	ENSMUST00000119020	TC0200000736.mm.1	41.0696	43.7133	39.1245	36.2523	51.9842	58.892	45.8866	32.2226	predicted gene 13463 [Source:MGI Symbol;Acc:MGI:3649844]	Multiple_Complex
Kynu	NM_001289593; NM_001289594; NM_027552; ENSMUST00000028223; ENSMUST00000050511; ENSMUST00000112826; ENSMUST00000130968; ENSMUST00000138540; ENSMUST00000148855; BC026950; BC069848; NM_027552.1; OTTMUST00000029322; OTTMUST00000029323; OTTMUST00000029324; OTTMUST00000029325; OTTMUST00000029326; OTTMUST00000029327; uc008jos.1; uc008jot.1; uc012bvc.1	TC0200000740.mm.1	15.8895	14.1232	15.6707	16.5642	20.5348	25.8125	27.6652	16.6795	kynureninase (L-kynurenine hydrolase); kynureninase (L-kynurenine hydrolase) (Kynu), mRNA.	Multiple_Complex
Arhgap15	NM_001025377; NM_153820; ENSMUST00000055776; ENSMUST00000112822; ENSMUST00000112824; ENSMUST00000128630; ENSMUST00000140528; BC024887; BC034881; NM_001025377.1; NM_153820.3; OTTMUST00000029352; OTTMUST00000029353; OTTMUST00000029354; OTTMUST00000029355; OTTMUST00000029356; uc008jov.1; uc008jow.1; uc008jox.1	TC0200000741.mm.1	52.3457	49.5221	43.1115	37.2715	54.1917	45.2548	39.1245	60.1295	Rho GTPase activating protein 15 (Arhgap15), transcript variant 2, mRNA.; Rho GTPase activating protein 15	Multiple_Complex
Gm13477	ENSMUST00000121620	TC0200000756.mm.1	36.2523	35.261	30.6965	38.0546	32	30.6965	63.5579	37.5307	predicted gene 13477 [Source:MGI Symbol;Acc:MGI:3652109]	Multiple_Complex
Zeb2os	NM_001177394; NM_001177395	TC0200000759.mm.1	14.3204	14.5203	14.723	15.7797	19.6983	21.8566	23.5883	16.5642	zinc finger E-box binding homeobox 2, opposite strand (Zeb2os), transcript variant 1, mRNA.; zinc finger E-box binding homeobox 2, opposite strand (Zeb2os), transcript variant 2, mRNA.	Multiple_Complex
Gm13475	ENSMUST00000119290	TC0200000764.mm.1	235.568	250.732	227.544	230.72	404.501	233.941	374.806	224.411	predicted gene 13475 [Source:MGI Symbol;Acc:MGI:3652111]	Multiple_Complex
Gm13478	ENSMUST00000118312	TC0200000767.mm.1	170.072	174.853	221.322	393.44	136.239	165.421	160.898	106.153	predicted gene 13478 [Source:MGI Symbol;Acc:MGI:3651984]	Multiple_Complex
Gm13468; RP23-103G12.1	ENSMUST00000118017; OTTMUST00000029358	TC0200000774.mm.1	1234.75	1097.5	1260.69	1408.55	1910.85	1217.75	814.629	873.098	predicted gene 13468; novel pseudogene	Multiple_Complex
Gm13471	ENSMUST00000122057	TC0200000775.mm.1	17.7531	15.0324	17.7531	18.7654	21.5557	23.9176	19.1597	17.3878	predicted gene 13471 [Source:MGI Symbol;Acc:MGI:3649390]	Multiple_Complex
Gm13482	ENSMUST00000119842	TC0200000776.mm.1	27.6652	24.9333	32.6724	25.4572	42.8137	40.5042	52.7098	28.6408	predicted gene 13482 [Source:MGI Symbol;Acc:MGI:3651625]	Multiple_Complex
Gm13472	ENSMUST00000120948	TC0200000777.mm.1	33.3589	27.6652	42.8137	68.1197	23.4254	23.4254	20.393	25.6342	predicted gene 13472 [Source:MGI Symbol;Acc:MGI:3649391]	Multiple_Complex
Acvr2a	NM_007396; ENSMUST00000063886; ENSMUST00000156681; BC138823; NM_007396.4; OTTMUST00000029496; OTTMUST00000029497; uc008jpn.2; uc008jpo.2	TC0200000781.mm.1	139.102	131.599	107.635	112.986	65.7993	63.1189	88.647	133.436	activin receptor IIA	Multiple_Complex
Mbd5	NM_029924; ENSMUST00000047413; ENSMUST00000112745; ENSMUST00000112754; ENSMUST00000122841; ENSMUST00000127085; ENSMUST00000132717; ENSMUST00000142250; ENSMUST00000147023; ENSMUST00000147055; ENSMUST00000148796; ENSMUST00000154653; BC138375; BC138378; NM_029924.2; OTTMUST00000029632; OTTMUST00000029633; OTTMUST00000029644; OTTMUST00000029645; OTTMUST00000029646; OTTMUST00000029647; OTTMUST00000029…	TC0200000783.mm.1	436.549	471.136	308.687	298.172	445.722	286.026	235.568	897.644	methyl-CpG binding domain protein 5	Multiple_Complex
Gm13510	ENSMUST00000118659	TC0200000792.mm.1	17.6305	20.393	25.9921	20.2521	16.3362	22.0087	27.4741	37.014	predicted gene 13510 [Source:MGI Symbol;Acc:MGI:3649639]	Multiple_Complex
Kif5c	NM_008449; ENSMUST00000028102; ENSMUST00000127245; ENSMUST00000132968; ENSMUST00000138834; ENSMUST00000146247; ENSMUST00000152353; BC067051; NM_008449.2; OTTMUST00000029661; OTTMUST00000029861; OTTMUST00000029862; OTTMUST00000029863; OTTMUST00000029864; OTTMUST00000029865; uc008jpy.1	TC0200000801.mm.1	843.357	809.002	754.826	734.185	873.098	739.292	704.277	826.001	kinesin family member 5C	Multiple_Complex
Lypd6b	NM_027990; ENSMUST00000028103; ENSMUST00000129867; ENSMUST00000153422; BC126943; NM_027990.3; OTTMUST00000029444; OTTMUST00000029445; OTTMUST00000029446; uc008jpz.1; uc012bvf.1	TC0200000803.mm.1	58.4852	67.6492	65.3448	76.1093	66.257	88.0347	59.7141	72.5046	LY6/PLAUR domain containing 6B	Multiple_Complex
Lypd6	NM_177139; NR_033304; ENSMUST00000053208; ENSMUST00000112712; ENSMUST00000126337; ENSMUST00000128451; ENSMUST00000169232; BC070462; NM_177139.5; NR_033304.2; OTTMUST00000029475; OTTMUST00000029476; OTTMUST00000029477; uc008jqa.3; uc012bvg.2	TC0200000804.mm.1	101.125	101.829	92.4115	82.1393	160.898	118.603	49.5221	144.007	LY6/PLAUR domain containing 6	Multiple_Complex
Gm13486	ENSMUST00000119910	TC0200000807.mm.1	18.3792	16.6795	19.8353	18.3792	20.8215	20.5348	25.6342	22.7848	predicted gene 13486 [Source:MGI Symbol;Acc:MGI:3651420]	Multiple_Complex
Gm13498	NR_033595; NR_033595.1; uc012bvh.1	TC0200000811.mm.1	396.177	451.944	385.343	306.555	191.341	219.793	388.023	357.054	heat shock protein 90 alpha (cytosolic), class B member 1 pseudogene; predicted gene 13498	Multiple_Complex
Gm13500	ENSMUST00000119348	TC0200000812.mm.1	44.0173	40.2244	54.1917	64.8934	44.9422	56.493	57.2816	39.9466	predicted gene 13500 [Source:MGI Symbol;Acc:MGI:3650380]	Multiple_Complex
Gm13494	ENSMUST00000120828	TC0200000815.mm.1	22.3159	21.8566	27.2843	27.6652	30.91	30.6965	29.446	27.4741	predicted gene 13494 [Source:MGI Symbol;Acc:MGI:3651037]	Multiple_Complex
Rif1	NM_175238; ENSMUST00000069794; ENSMUST00000112693; ENSMUST00000125116; ENSMUST00000125322; ENSMUST00000125376; ENSMUST00000126218; ENSMUST00000145130; ENSMUST00000152178; NM_175238.5; OTTMUST00000029579; OTTMUST00000029830; OTTMUST00000029831; OTTMUST00000029832; OTTMUST00000029833; OTTMUST00000029834; OTTMUST00000029835; uc008jqq.1; uc008jqr.1; uc008jqs.1; uc008jqt.1; uc012bvj.1; uc012bvk.1	TC0200000821.mm.1	12077.2	12854.6	12245.8	9877.98	11505.2	7538.18	12503.1	7804.01	Rap1 interacting factor 1 homolog (yeast)	Multiple_Complex
Gm13541	ENSMUST00000119519	TC0200000828.mm.1	100.427	89.8845	152.219	131.599	80.4489	95.6704	113.772	82.1393	predicted gene 13541 [Source:MGI Symbol;Acc:MGI:3651925]	Multiple_Complex
Fmnl2	NM_172409; ENSMUST00000049483; ENSMUST00000050719; ENSMUST00000090952; ENSMUST00000127122; ENSMUST00000134459; ENSMUST00000155586; BC168411; NM_172409.2; OTTMUST00000029560; OTTMUST00000029561; OTTMUST00000029562; OTTMUST00000029563; uc008jrh.1; uc008jri.1; uc008jrj.1	TC0200000833.mm.1	455.087	484.382	393.44	390.722	770.686	544.958	576.03	556.408	formin-like 2; Synthetic construct Mus musculus clone IMAGE:100068380, MGC:195924 formin-like 2 (Fmnl2) mRNA, encodes complete protein.	Multiple_Complex
Arl6ip6	NM_022989; ENSMUST00000028336; ENSMUST00000155517; BC019550; BC157980; NM_022989.4; OTTMUST00000029590; OTTMUST00000029591; uc008jrn.2; uc008jro.2	TC0200000843.mm.1	1152.06	942.272	739.292	776.047	568.1	552.565	1305.15	1217.75	ADP-ribosylation factor-like 6 interacting protein 6	Multiple_Complex
Gm13503	ENSMUST00000119017	TC0200000845.mm.1	188.706	183.546	107.635	106.891	49.18	57.2816	97.0059	140.07	predicted gene 13503 [Source:MGI Symbol;Acc:MGI:3649895]	Multiple_Complex
Gm14035	ENSMUST00000117596	TC0200000849.mm.1	38.5859	34.7755	29.8571	30.2738	33.3589	34.0598	41.6429	37.5307	predicted gene 14035 [Source:MGI Symbol;Acc:MGI:3650858]	Multiple_Complex
Galnt13	NM_173030; ENSMUST00000068595; ENSMUST00000112634; ENSMUST00000112635; ENSMUST00000112636; ENSMUST00000136642; BC131651; BC131652; NM_173030.2; OTTMUST00000036656; OTTMUST00000036657; OTTMUST00000036658; OTTMUST00000036659; uc008jrq.1; uc008jrr.1; uc008jrs.1; uc012bvm.1	TC0200000850.mm.1	19.2929	18.507	20.9663	20.9663	22.4711	27.4741	27.8576	21.259	UDP-N-acetyl-alpha-D-galactosamine:polypeptide N-acetylgalactosaminyltransferase 13	Multiple_Complex
Gm13517	ENSMUST00000120782	TC0200000861.mm.1	47.5048	42.2243	51.9842	46.5271	53.8174	48.1679	53.0765	39.9466	predicted gene 13517 [Source:MGI Symbol;Acc:MGI:3649620]	Multiple_Complex
Gm13518	ENSMUST00000120018	TC0200000862.mm.1	25.1067	21.1121	28.0514	21.8566	21.5557	19.5622	40.2244	18.0009	predicted gene 13518 [Source:MGI Symbol;Acc:MGI:3649619]	Multiple_Complex
Gm13519; RP23-35D6.1	ENSMUST00000120500; OTTMUST00000029692	TC0200000865.mm.1	2721.15	1978.24	2105.58	2368.9	3615.55	1897.65	1951	2320.15	predicted gene 13519; novel pseudogene	Multiple_Complex
Gpd2	NM_001145820; NM_010274; ENSMUST00000028167; ENSMUST00000112618; ENSMUST00000124689; ENSMUST00000141536; ENSMUST00000148991; ENSMUST00000154612; ENSMUST00000169687; BC021359; NM_001145820.1; NM_010274.3; OTTMUST00000029883; OTTMUST00000030012; OTTMUST00000030013; OTTMUST00000031299; OTTMUST00000031300; uc008jsc.2; uc008jsd.1; uc008jse.2	TC0200000868.mm.1	916.506	910.175	982.286	903.888	191.341	149.086	415.873	448.822	glycerol phosphate dehydrogenase 2, mitochondrial	Multiple_Complex
Galnt5	NM_172855; ENSMUST00000112616; ENSMUST00000144671; ENSMUST00000166729; BC116332; NM_172855.3; OTTMUST00000030005; OTTMUST00000030006; uc012bvo.1	TC0200000872.mm.1	18.3792	16.9123	19.1597	19.1597	25.6342	24.2515	31.5594	20.8215	UDP-N-acetyl-alpha-D-galactosamine:polypeptide N-acetylgalactosaminyltransferase 5	Multiple_Complex
Gm13545	ENSMUST00000119044	TC0200000877.mm.1	2320.15	2241.11	2418.67	3147.52	497.999	442.643	1209.34	1002.93	predicted gene 13545 [Source:MGI Symbol;Acc:MGI:3649667]	Multiple_Complex
Upp2	NM_001289659; NM_001289660; NM_029692; ENSMUST00000059102; ENSMUST00000071543; ENSMUST00000102755; ENSMUST00000128864; ENSMUST00000135737; ENSMUST00000137007; BC027189; NM_029692.2; OTTMUST00000030468; OTTMUST00000030469; OTTMUST00000030470; OTTMUST00000030471; OTTMUST00000030472; OTTMUST00000030473; uc008jsv.1; uc008jsw.1; uc012bvp.1	TC0200000879.mm.1	23.2636	23.1029	25.9921	26.9087	34.5353	36.7583	37.5307	24.761	uridine phosphorylase 2	Multiple_Complex
Gm13560	ENSMUST00000121865	TC0200000887.mm.1	11.0809	15.8895	10.0561	16.6795	19.4271	20.5348	15.6707	14.6213	predicted gene 13560 [Source:MGI Symbol;Acc:MGI:3651673]	Multiple_Complex
Pkp4	NM_026361; NM_175464; ENSMUST00000037903; ENSMUST00000102754; ENSMUST00000112577; ENSMUST00000122888; ENSMUST00000123908; ENSMUST00000124127; ENSMUST00000124725; ENSMUST00000126749; ENSMUST00000151452; ENSMUST00000168631; ENSMUST00000183359; ENSMUST00000183625; ENSMUST00000184332; ENSMUST00000184705; BC079848; BC082578; NM_026361.2; NM_175464.2; OTTMUST00000030307; OTTMUST00000030308; OTTMUST0000…	TC0200000888.mm.1	2817.11	2916.45	2665.15	2646.74	4705.07	3373.43	4576.41	3468.27	plakophilin 4	Multiple_Complex
Gm13551	ENSMUST00000121286	TC0200000893.mm.1	30.2738	32.8996	35.5062	33.3589	32	41.0696	32	27.6652	predicted gene 13551 [Source:MGI Symbol;Acc:MGI:3650818]	Multiple_Complex
Dapl1	NM_029723; ENSMUST00000028369; ENSMUST00000144415; BC116916; BC116920; NM_029723.3; OTTMUST00000030305; OTTMUST00000030306; uc008jti.3; uc012bvq.2	TC0200000894.mm.1	39.6706	41.6429	37.5307	39.9466	50.2134	59.3016	112.206	93.0542	death associated protein-like 1	Multiple_Complex
Tanc1	NM_198294; ENSMUST00000037526; ENSMUST00000056900; ENSMUST00000112568; ENSMUST00000126271; ENSMUST00000127013; ENSMUST00000128030; ENSMUST00000136248; ENSMUST00000139863; ENSMUST00000142573; ENSMUST00000147650; ENSMUST00000162857; BC079914; BC141367; NM_198294.2; OTTMUST00000030323; OTTMUST00000030326; OTTMUST00000030327; OTTMUST00000030328; OTTMUST00000030329; OTTMUST00000030330; OTTMUST00000030…	TC0200000897.mm.1	225.972	235.568	213.783	209.383	385.343	265.028	224.411	199.466	tetratricopeptide repeat, ankyrin repeat and coiled-coil containing 1	Multiple_Complex
March7	NM_020575; ENSMUST00000067542; ENSMUST00000102747; ENSMUST00000102748; ENSMUST00000126986; ENSMUST00000131813; ENSMUST00000134905; ENSMUST00000136367; ENSMUST00000142485; ENSMUST00000143806; BC025029; NM_020575.2; OTTMUST00000030731; OTTMUST00000030732; OTTMUST00000030733; OTTMUST00000030734; OTTMUST00000030735; OTTMUST00000030736; OTTMUST00000030737; OTTMUST00000040241; uc008jtx.1; uc008jty.1; u…	TC0200000909.mm.1	1226.22	1097.5	1314.23	1370.04	714.109	873.098	699.413	861.078	membrane-associated ring finger (C3HC4) 7	Multiple_Complex
Gm13566	ENSMUST00000117428	TC0200000915.mm.1	31.779	22.9433	29.8571	34.2968	41.0696	45.5696	54.9482	36.2523	predicted gene 13566 [Source:MGI Symbol;Acc:MGI:3649655]	Multiple_Complex
Gm13581	ENSMUST00000120675	TC0200000918.mm.1	46.8507	52.3457	52.7098	63.5579	53.4456	46.5271	56.8859	38.0546	predicted gene 13581 [Source:MGI Symbol;Acc:MGI:3650461]	Multiple_Complex
Tank	NM_001164071; NM_001164072; NM_011529; ENSMUST00000078074; ENSMUST00000112494; ENSMUST00000112495; ENSMUST00000112501; ENSMUST00000112502; ENSMUST00000136688; ENSMUST00000139533; ENSMUST00000141544; ENSMUST00000143515; ENSMUST00000145632; ENSMUST00000154693; BC026148; NM_001164071.1; NM_001164072.1; NM_011529.2; OTTMUST00000031374; OTTMUST00000031375; OTTMUST00000031376; OTTMUST00000031377; OTTMU…	TC0200000923.mm.1	93.0542	88.647	66.257	65.7993	95.0095	75.5835	173.645	140.07	TRAF family member-associated Nf-kappa B activator	Multiple_Complex
Psmd14	NM_021526; ENSMUST00000028278; ENSMUST00000125388; ENSMUST00000134658; ENSMUST00000135265; ENSMUST00000139475; ENSMUST00000146051; ENSMUST00000153683; ENSMUST00000154627; BC003742; NM_021526.2; OTTMUST00000031567; OTTMUST00000031568; OTTMUST00000031569; OTTMUST00000031570; OTTMUST00000031571; OTTMUST00000031572; OTTMUST00000031573; OTTMUST00000031574; uc008jvc.1	TC0200000924.mm.1	809.002	849.223	739.292	630.346	107.635	103.25	324.034	364.557	proteasome (prosome, macropain) 26S subunit, non-ATPase, 14	Multiple_Complex
Tbr1	NM_009322; ENSMUST00000048934; ENSMUST00000102737; ENSMUST00000131538; ENSMUST00000136867; BC052737; BC058399; NM_009322.3; OTTMUST00000031566; OTTMUST00000031578; OTTMUST00000031579; OTTMUST00000031580; uc008jvd.1	TC0200000927.mm.1	17.3878	17.5087	19.5622	19.1597	22.3159	30.6965	26.5382	18.1261	T-box brain gene 1	Multiple_Complex
Slc4a10	NM_001242378; NM_001242379; NM_001242380; NM_001242381; NM_001242382; NM_001242383; NM_033552; ENSMUST00000054484; ENSMUST00000102735; ENSMUST00000112480; ENSMUST00000147917; ENSMUST00000149527; ENSMUST00000155219; ENSMUST00000156534; BC039226; NM_001242378.1; NM_001242379.1; NM_001242380.1; NM_001242381.1; NM_001242382.1; NM_001242383.1; NM_033552.3; OTTMUST00000030426; OTTMUST00000030427; OTTMU…	TC0200000929.mm.1	37.7918	41.6429	44.0173	44.3235	58.4852	47.5048	47.8352	52.7098	solute carrier family 4, sodium bicarbonate cotransporter-like, member 10	Multiple_Complex
Gca	NM_145523; ENSMUST00000028257; ENSMUST00000148083; BC021450; NM_145523.3; OTTMUST00000030860; OTTMUST00000030861; uc008jvp.1	TC0200000933.mm.1	106.153	109.896	81.5719	85.6274	45.5696	38.3193	36.5044	184.823	grancalcin	Multiple_Complex
Scn2a1	NM_001099298; ENSMUST00000028377; ENSMUST00000100067; ENSMUST00000138368; ENSMUST00000144254; NM_001099298.2; OTTMUST00000031206; OTTMUST00000031207; OTTMUST00000031208; uc008jwo.2; uc012bwd.1	TC0200000953.mm.1	19.8353	21.5557	21.8566	21.8566	26.9087	29.2426	28.2465	23.7524	sodium channel, voltage-gated, type II, alpha 1	Multiple_Complex
Csrnp3	NM_153409; NM_178634; ENSMUST00000053910; ENSMUST00000112394; ENSMUST00000112397; ENSMUST00000122912; ENSMUST00000129133; ENSMUST00000139896; ENSMUST00000145598; ENSMUST00000176109; BC055701; NM_153409.5; NM_178634.2; OTTMUST00000031210; OTTMUST00000031310; OTTMUST00000031311; OTTMUST00000031312; OTTMUST00000031313; OTTMUST00000031314; OTTMUST00000031315; OTTMUST00000031316; uc008jwq.2; uc008jwr.…	TC0200000955.mm.1	106.153	125.366	90.5097	84.4485	140.07	116.97	135.298	176.069	cysteine-serine-rich nuclear protein 3	Multiple_Complex
Gm1322	NM_001033477; NM_001033477.3; uc012bwk.1	TC0200000965.mm.1	10.9283	12.042	10.2674	13.3614	13.5479	15.5625	21.259	13.9288	predicted gene 1322	Multiple_Complex
Xirp2	NM_001024618; NM_001083919; ENSMUST00000028410; ENSMUST00000112347; NM_001024618.2; NM_001083919.1; OTTMUST00000030942; uc008jxj.1; uc008jxk.1; uc012bwl.1; uc012bwm.1; uc012bwn.1	TC0200000966.mm.1	19.0273	20.6776	17.6305	19.1597	20.5348	25.2813	25.6342	24.2515	xin actin-binding repeat containing 2	Multiple_Complex
B3galt1	NM_020283; ENSMUST00000042456; ENSMUST00000112346; ENSMUST00000180887; BC094660; BC132246; BC132528; NM_020283.3; OTTMUST00000030981; OTTMUST00000112460; uc008jxm.2	TC0200000969.mm.1	24.0839	23.2636	22.3159	22.4711	30.2738	32.2226	23.5883	24.2515	UDP-Gal:betaGlcNAc beta 1,3-galactosyltransferase, polypeptide 1	Multiple_Complex
Gm13606; RP23-27J1.3	ENSMUST00000118172; OTTMUST00000030980	TC0200000985.mm.1	1871.53	1782.89	2272.4	2896.31	5792.62	5293.48	942.272	1296.13	predicted gene 13606; novel pseudogene	Multiple_Complex
4932414N04Rik	NM_183113; ENSMUST00000055930; ENSMUST00000112332; ENSMUST00000125621; ENSMUST00000128259; ENSMUST00000135023; NM_183113.3; uc008jxr.1	TC0200000990.mm.1	27.0958	29.0406	26.7228	28.84	34.0598	35.261	38.5859	29.446	RIKEN cDNA 4932414N04 gene	Multiple_Complex
Cers6	NM_172856; ENSMUST00000028426; ENSMUST00000141498; ENSMUST00000141983; ENSMUST00000155748; ENSMUST00000175684; ENSMUST00000176018; ENSMUST00000183755; BC057629; NM_172856.3; OTTMUST00000031236; OTTMUST00000031237; OTTMUST00000031238; OTTMUST00000031239; OTTMUST00000110036; OTTMUST00000110037; OTTMUST00000117228; uc008jxs.1	TC0200000994.mm.1	709.176	749.612	588.134	580.037	903.888	786.88	1074.91	1144.1	ceramide synthase 6	Multiple_Complex
Nostrin	NM_181547; ENSMUST00000041865; ENSMUST00000141276; BC069942; NM_181547.3; OTTMUST00000031234; OTTMUST00000031235; uc008jxt.2	TC0200001002.mm.1	40.2244	40.5042	35.261	39.1245	39.6706	47.1766	38.8542	53.4456	nitric oxide synthase trafficker	Multiple_Complex
G6pc2	NM_001289856; NM_001289857; NM_021331; ENSMUST00000005364; ENSMUST00000112317; ENSMUST00000129288; ENSMUST00000151953; BC148698; NM_021331.3; OTTMUST00000031263; OTTMUST00000031264; OTTMUST00000031265; OTTMUST00000031266; uc008jxy.1; uc008jxz.1	TC0200001003.mm.1	18.3792	19.5622	20.8215	20.393	23.1029	25.2813	24.4201	31.779	glucose-6-phosphatase, catalytic, 2; Synthetic construct Mus musculus clone IMAGE:100015702, MGC:183404 glucose-6-phosphatase, catalytic, 2 (G6pc2) mRNA, encodes complete protein.	Multiple_Complex
Gm13614	ENSMUST00000117306	TC0200001005.mm.1	16.4498	18.0009	17.7531	17.3878	16.9123	27.2843	24.761	15.6707	predicted gene 13614 [Source:MGI Symbol;Acc:MGI:3651723]	Multiple_Complex
Bbs5	NM_028284; ENSMUST00000074963; ENSMUST00000112286; ENSMUST00000127806; ENSMUST00000130061; ENSMUST00000134659; ENSMUST00000143165; ENSMUST00000144240; ENSMUST00000149276; BC061031; NM_028284.2; OTTMUST00000031285; OTTMUST00000031286; OTTMUST00000031287; OTTMUST00000031288; OTTMUST00000031289; OTTMUST00000031290; OTTMUST00000031291; OTTMUST00000031292; uc008jyf.1; uc012bwp.1	TC0200001007.mm.1	125.366	128	116.97	120.259	113.772	101.829	48.5029	195.361	Bardet-Biedl syndrome 5 (human)	Multiple_Complex
Ppig	NM_001081086; ENSMUST00000040915; ENSMUST00000090858; ENSMUST00000124810; ENSMUST00000125105; ENSMUST00000128506; ENSMUST00000134424; ENSMUST00000134500; ENSMUST00000142839; ENSMUST00000143954; ENSMUST00000144652; ENSMUST00000146234; ENSMUST00000153772; BC150694; NM_001081086.1; OTTMUST00000031354; OTTMUST00000031355; OTTMUST00000031356; OTTMUST00000031357; OTTMUST00000031358; OTTMUST00000031359;…	TC0200001009.mm.1	3061.45	3019.3	3169.41	2936.74	1562.89	1448.15	1710.26	1992	peptidyl-prolyl isomerase G (cyclophilin G)	Multiple_Complex
Phospho2	NM_028521; ENSMUST00000028494; ENSMUST00000112266; ENSMUST00000128765; ENSMUST00000131100; ENSMUST00000151298; ENSMUST00000180290; BC025612; BC031523; NM_028521.2; OTTMUST00000031418; OTTMUST00000031419; OTTMUST00000031420; OTTMUST00000031421; OTTMUST00000031422; uc008jyp.1; uc008jyq.1; uc008jyr.1	TC0200001011.mm.1	512	477.713	367.093	364.557	596.344	448.822	814.629	962.071	phosphatase, orphan 2	Multiple_Complex
Klhl23	NM_177784; ENSMUST00000053087; ENSMUST00000135759; ENSMUST00000152898; BC072626; NM_177784.4; OTTMUST00000031423; OTTMUST00000031424; OTTMUST00000031425; uc008jys.2	TC0200001012.mm.1	21.8566	22.4711	22.0087	22.4711	19.8353	24.0839	25.6342	18.7654	kelch-like 23	Multiple_Complex
Ssb	NM_001110145; NM_009278; ENSMUST00000090852; ENSMUST00000112260; ENSMUST00000132186; ENSMUST00000132603; ENSMUST00000156057; ENSMUST00000166411; BC003820; BC106150; NM_001110145.1; NM_009278.4; OTTMUST00000031436; OTTMUST00000031437; OTTMUST00000031438; OTTMUST00000031439; OTTMUST00000031440; uc008jyt.2; uc012bws.1; uc012bwt.1	TC0200001013.mm.1	4576.41	4359.66	2797.65	2721.15	1520.15	1858.6	3350.13	5673.41	Sjogren syndrome antigen B	Multiple_Complex
Ubr3	NM_001081548; NM_177783; ENSMUST00000055758; ENSMUST00000112251; ENSMUST00000123890; ENSMUST00000125608; ENSMUST00000126165; ENSMUST00000131553; ENSMUST00000136543; ENSMUST00000142563; ENSMUST00000150301; ENSMUST00000152610; NM_001081548.2; NM_177783.5; OTTMUST00000031645; OTTMUST00000031646; OTTMUST00000031647; OTTMUST00000031648; OTTMUST00000031649; OTTMUST00000031650; OTTMUST00000031651; OTTMU…	TC0200001015.mm.1	897.644	910.175	1024	968.763	749.612	548.748	1418.35	968.763	ubiquitin protein ligase E3 component n-recognin 3 (Ubr3), transcript variant 1, mRNA.; ubiquitin protein ligase E3 component n-recognin 3	Multiple_Complex
Myo3b	NM_177376; ENSMUST00000060208; ENSMUST00000112241; ENSMUST00000112243; BC157062; NM_177376.4; OTTMUST00000031642; OTTMUST00000031643; uc008jzd.2; uc008jze.1; uc008jzf.2; uc012bww.1	TC0200001018.mm.1	20.5348	21.7057	23.4254	23.5883	30.0647	34.2968	33.1285	21.5557	myosin IIIB; Synthetic construct Mus musculus clone IMAGE:100063309, MGC:191062 myosin IIIB (Myo3b) mRNA, encodes complete protein.	Multiple_Complex
Erich2	NM_025744; ENSMUST00000100041; ENSMUST00000123137; ENSMUST00000134607; ENSMUST00000136967; ENSMUST00000153121; NM_025744.2; OTTMUST00000083413; OTTMUST00000083414; OTTMUST00000083415; OTTMUST00000083416; OTTMUST00000083417; uc008jzh.1; uc008jzi.1	TC0200001022.mm.1	16.2234	15.2422	17.0299	16.9123	23.9176	24.0839	19.8353	17.3878	glutamate rich 2	Multiple_Complex
Gad1	NM_008077; ENSMUST00000094934; ENSMUST00000123330; ENSMUST00000130604; ENSMUST00000130618; ENSMUST00000130998; ENSMUST00000140478; ENSMUST00000148210; ENSMUST00000155979; BC027059; NM_008077.4; OTTMUST00000083419; OTTMUST00000083431; OTTMUST00000083432; OTTMUST00000083433; OTTMUST00000083434; OTTMUST00000083435; OTTMUST00000083436; OTTMUST00000083437; uc008jzj.1; uc008jzk.1; uc008jzl.1; uc008jzm.1	TC0200001023.mm.1	19.6983	18.8959	21.4068	20.8215	28.84	28.443	28.2465	22.1618	glutamate decarboxylase 1	Multiple_Complex
Gorasp2	NM_027352; NR_027343; ENSMUST00000028509; ENSMUST00000112201; ENSMUST00000112205; ENSMUST00000130970; ENSMUST00000133432; ENSMUST00000136485; BC005600; BC016455; NM_027352.4; NR_027343.1; OTTMUST00000031663; OTTMUST00000031664; OTTMUST00000031665; OTTMUST00000031666; OTTMUST00000031667; OTTMUST00000031712; uc008jzn.2; uc008jzo.2; uc008jzp.2; uc008jzq.1; uc008jzr.1; uc008jzs.2	TC0200001025.mm.1	867.067	855.13	739.292	797.865	1038.29	916.506	734.185	1370.04	golgi reassembly stacking protein 2	Multiple_Complex
Gm13633	ENSMUST00000120668	TC0200001026.mm.1	20.8215	18.1261	17.1484	18.2522	22.7848	21.8566	23.1029	20.2521	predicted gene 13633 [Source:MGI Symbol;Acc:MGI:3651356]	Multiple_Complex
Dcaf17	NM_001165980; NM_001165981; NM_001165982; NM_198005; ENSMUST00000064141; ENSMUST00000102701; ENSMUST00000112159; ENSMUST00000112167; ENSMUST00000130292; ENSMUST00000132619; ENSMUST00000135357; ENSMUST00000136299; ENSMUST00000154704; BC031546; NM_001165980.1; NM_001165981.1; NM_001165982.1; NM_198005.2; OTTMUST00000031759; OTTMUST00000031760; OTTMUST00000031761; OTTMUST00000031762; OTTMUST00000031…	TC0200001030.mm.1	148.056	156.498	138.141	121.938	61.8199	69.551	119.428	93.0542	DDB1 and CUL4 associated factor 17	Multiple_Complex
Dync1i2	NM_001198872; NM_001198873; NM_001198874; NM_001198875; NM_001198876; NM_001198877; NM_001198878; NM_010064; ENSMUST00000081710; ENSMUST00000100028; ENSMUST00000112136; ENSMUST00000112138; ENSMUST00000112139; ENSMUST00000112140; ENSMUST00000112142; ENSMUST00000112144; ENSMUST00000137683; ENSMUST00000138613; ENSMUST00000141619; ENSMUST00000149735; BC139374; BC139375; NM_001198872.1; NM_001198873.1…	TC0200001033.mm.1	770.686	765.363	709.176	634.73	765.363	666.287	1128.35	1251.98	dynein cytoplasmic 1 intermediate chain 2	Multiple_Complex
Hat1	NM_026115; ENSMUST00000028408; ENSMUST00000112122; ENSMUST00000144888; ENSMUST00000145147; BC055460; NM_026115.4; OTTMUST00000031861; OTTMUST00000031862; OTTMUST00000031863; uc008kap.1; uc008kaq.1	TC0200001036.mm.1	556.408	576.03	433.534	401.707	136.239	136.239	508.463	424.612	histone aminotransferase 1	Multiple_Complex
[truncated: 25,477 more rows]
